# Supplementary material for: Checklist of British and Irish Hymenoptera - Ichneumonidae
Source: Biodivers Data J. 2016 Jul 5;(4):e9042. doi: 10.3897/BDJ.4.e9042 (PMC5039340; doi:10.3897/BDJ.4.e9042)
Supplement: Supplementary material 1 — Checklist of British and Irish Ichneumonidae [file biodiversity_data_journal-4-e9042-s001.xlsx]

## Sheet: Sheet1
Taxon_Local_ID	Kingdom	Subkingdom	Phylum	Subphylum	Superclass	Class	Subclass	Superorder	Order	Suborder	Infraorder	Superfamily	Family	Subfamily	Tribe	Subtribe	Genus	Subgenus	Species	Subspecies	Variety	Form	Authorship	Nomenclature	Feeds on	Symbiotic with	Parasite of	Host of	Native Status	Conservation Status	Distribution	Horizon	Notes
300001	Animalia		Arthropoda			Insecta			Hymenoptera			Ichneumonoidea	Ichneumonidae	ACAENITINAE									Förster, 1869										Tribes within Acaenitinae (formerly Acaenitini and Coleocentrini) were abandoned by Wahl &amp; Gauld (1998). Distribution data from Fitton (1981) and Shaw &amp; Wahl (1989), with further references given.
300002	Animalia		Arthropoda			Insecta			Hymenoptera			Ichneumonoidea	Ichneumonidae	ACAENITINAE			Acaenitus						Latreille, 1809	<p style="margin-left: 40px;"><i>ACOENITES</i> Latreille, 1810</p><p style="margin-left: 40px;"><i>ACOENITUS</i> Griffith, 1832</p>
300003	Animalia		Arthropoda			Insecta			Hymenoptera			Ichneumonoidea	Ichneumonidae	ACAENITINAE			Acaenitus		dubitator				(Panzer, 1800)	<p style="margin-left: 40px;"><i>Ichneumon dubitator</i> Panzer, 1800</p>							Scotland
300004	Animalia		Arthropoda			Insecta			Hymenoptera			Ichneumonoidea	Ichneumonidae	ACAENITINAE			Arotes						Gravenhorst, 1829	<p style="margin-left: 40px;"><i>ASTHENOMERIS</i> Förster, 1869</p><p style="margin-left: 40px;"><i>SPHALERUS</i> Kriechbaumer, 1878</p>
300005	Animalia		Arthropoda			Insecta			Hymenoptera			Ichneumonoidea	Ichneumonidae	ACAENITINAE			Arotes		albicinctus				Gravenhorst, 1829	<p style="margin-left: 40px;"><i>bifasciatus</i> (Kriechbaumer, 1878, <i>Sphalerus</i>)</p><p style="margin-left: 40px;"><i>annulicornis</i> Kriechbaumer, 1894</p>							England
300006	Animalia		Arthropoda			Insecta			Hymenoptera			Ichneumonoidea	Ichneumonidae	ACAENITINAE			Coleocentrus						Gravenhorst, 1829	<p style="margin-left: 40px;"><i>MACROCOLEUS</i> Desvignes, 1850</p>
300007	Animalia		Arthropoda			Insecta			Hymenoptera			Ichneumonoidea	Ichneumonidae	ACAENITINAE			Coleocentrus		croceicornis				(Gravenhorst, 1829)	<p style="margin-left: 40px;"><i>Macrus croceicornis</i> Gravenhorst, 1829</p>							England		Coleocentrus soleatus (Gravenhorst, 1829, Macrus) was removed from synonymy by Kasparyan &amp; Khalaim (2007b).
300008	Animalia		Arthropoda			Insecta			Hymenoptera			Ichneumonoidea	Ichneumonidae	ACAENITINAE			Coleocentrus		excitator				(Poda, 1761)	<p style="margin-left: 40px;"><i>Ichneumon excitator</i> Poda, 1761</p><p style="margin-left: 40px;"><i>segmentator</i> (Fabricius, 1793, <i>Ichneumon</i>)</p><p style="margin-left: 40px;"><i>gigantor</i> (Thunberg, 1824, <i>Ichneumon</i>)</p><p style="margin-left: 40px;"><i>longiventris</i> (Gravenhorst, 1829, <i>Macrus</i>)</p><p style="margin-left: 40px;"><i>segmentatrix</i> (Schulz, 1906, <i>…							Scotland		added by Shaw (1986)
300009	Animalia		Arthropoda			Insecta			Hymenoptera			Ichneumonoidea	Ichneumonidae	ACAENITINAE			Leptacoenites						Strobl, 1902
300010	Animalia		Arthropoda			Insecta			Hymenoptera			Ichneumonoidea	Ichneumonidae	ACAENITINAE			Leptacoenites		notabilis				(Desvignes, 1856)	<p style="margin-left: 40px;"><i>Lampronota notabilis</i> Desvignes, 1856</p><p style="margin-left: 40px;"><i>frauenfeldi</i> (Tschek, 1869, <i>Lissonota</i>)</p><p style="margin-left: 40px;"><i>marginatus</i> (Kriechbaumer, 1899, <i>Heterolabis</i>)</p><p style="margin-left: 40px;"><i>petiolaris</i> (Kriechbaumer, 1899, <i>Heterolabis</i>)</p><p style="margin-left: 40px;"><i>tscheki</i> (Strobl,…
300011	Animalia		Arthropoda			Insecta			Hymenoptera			Ichneumonoidea	Ichneumonidae	ACAENITINAE			Phaenolobus						Förster, 1869	<p style="margin-left: 40px;"><i>CHORISCHIZUS</i> Förster, 1869</p><p style="margin-left: 40px;"><i>MOLDACOENITUS</i> Constantineanu &amp; Constantineanu, 1968</p>
300012	Animalia		Arthropoda			Insecta			Hymenoptera			Ichneumonoidea	Ichneumonidae	ACAENITINAE			Phaenolobus		terebrator				(Scopoli, 1763)	<p style="margin-left: 40px;"><i>Ichneumon terebrator</i> Scopoli, 1763</p><p style="margin-left: 40px;"><i>arator</i> (Rossi, 1790, <i>Ichneumon</i>)</p>							England
300013	Animalia		Arthropoda			Insecta			Hymenoptera			Ichneumonoidea	Ichneumonidae	ADELOGNATHINAE									Thomson, 1888										Distribution data from Fitton et al. (1982) supplemented by the collections of NMS, with further references given. Note that, according to the molecular phylogenetic results of Laurenne et al. (2006), Adelognathus may be an aberrant genus of Cryptinae.
300014	Animalia		Arthropoda			Insecta			Hymenoptera			Ichneumonoidea	Ichneumonidae	ADELOGNATHINAE			Adelognathus						Holmgren, 1857	<p style="margin-left: 40px;"><i>PAMMICRA</i> Förster, 1869</p><p style="margin-left: 40px;"><i>NOTOMERIS</i> Förster, 1869</p><p style="margin-left: 40px;"><i>CNEMISCHYS</i> Förster, 1869</p><p style="margin-left: 40px;"><i>EPITROPUS</i> Rossem, 1990</p>
300015	Animalia		Arthropoda			Insecta			Hymenoptera			Ichneumonoidea	Ichneumonidae	ADELOGNATHINAE			Adelognathus		acantholydae				Kasparyan, 1986								Scotland		NMS, det. Shaw, added here
300016	Animalia		Arthropoda			Insecta			Hymenoptera			Ichneumonoidea	Ichneumonidae	ADELOGNATHINAE			Adelognathus		brevicornis				Holmgren, 1857	<p style="margin-left: 40px;"><i>limbatus</i> Thomson, 1888</p><p style="margin-left: 40px;"><i>montivagator</i> Aubert, 1976</p>							England, Scotland, Ireland		The chrysopygus (Grav.) referred to by Fitton et al. (1982) actually refers to punctulatus Thoms.; chrysopygus is the correct name for the species referred to as granulatus Perkins by Fitton et al. (1982) (Kasparyan, 1986). Some distribution data from Bennett et al. (2002).
300017	Animalia		Arthropoda			Insecta			Hymenoptera			Ichneumonoidea	Ichneumonidae	ADELOGNATHINAE			Adelognathus		britannicus				Perkins, 1943								England
300018	Animalia		Arthropoda			Insecta			Hymenoptera			Ichneumonoidea	Ichneumonidae	ADELOGNATHINAE			Adelognathus		chrysopygus				(Gravenhorst, 1829)	<p style="margin-left: 40px;"><i>Hemiteles chrysopygus</i> Gravenhorst, 1829</p><p style="margin-left: 40px;"><i>granulatus</i> Perkins, 1943</p>							England, Scotland, Ireland, Isle of Man
300019	Animalia		Arthropoda			Insecta			Hymenoptera			Ichneumonoidea	Ichneumonidae	ADELOGNATHINAE			Adelognathus		difformis				Holmgren, 1857								England		NMS, det. Shaw, added here
300020	Animalia		Arthropoda			Insecta			Hymenoptera			Ichneumonoidea	Ichneumonidae	ADELOGNATHINAE			Adelognathus		dorsalis				(Gravenhorst, 1829)	<p style="margin-left: 40px;"><i>Hemiteles dorsalis</i> Gravenhorst, 1829</p><p style="margin-left: 40px;"><i>melanius</i> Roman, 1918</p><p style="margin-left: 40px;"><i>insolitus</i> (Rossem, 1990, <i>Epitropus</i>)</p>							England, Scotland, Wales, Ireland, Isle of Man
300021	Animalia		Arthropoda			Insecta			Hymenoptera			Ichneumonoidea	Ichneumonidae	ADELOGNATHINAE			Adelognathus		laevicollis				Thomson, 1883								England, Ireland
300022	Animalia		Arthropoda			Insecta			Hymenoptera			Ichneumonoidea	Ichneumonidae	ADELOGNATHINAE			Adelognathus		leucotrochi				Shaw &amp; Wahl, 2014								England, Scotland		added by Shaw &amp; Wahl (2014)
300023	Animalia		Arthropoda			Insecta			Hymenoptera			Ichneumonoidea	Ichneumonidae	ADELOGNATHINAE			Adelognathus		nigriceps				Thomson, 1888								England, Wales		some distribution data from Askew (2000)
300024	Animalia		Arthropoda			Insecta			Hymenoptera			Ichneumonoidea	Ichneumonidae	ADELOGNATHINAE			Adelognathus		nigrifrons				Holmgren, 1857								England, Ireland		added by Fitton et al. (1982)
300025	Animalia		Arthropoda			Insecta			Hymenoptera			Ichneumonoidea	Ichneumonidae	ADELOGNATHINAE			Adelognathus		obscurus				Kasparyan, 1986								England, Scotland		added by Kasparyan (1990)
300026	Animalia		Arthropoda			Insecta			Hymenoptera			Ichneumonoidea	Ichneumonidae	ADELOGNATHINAE			Adelognathus		pallipes				(Gravenhorst, 1829)	<p style="margin-left: 40px;"><i>Plectiscus pallipes</i> Gravenhorst, 1829</p><p style="margin-left: 40px;"><i>ruthei</i> Holmgren, 1857</p><p style="margin-left: 40px;"><i>pallidipes</i> (Marshall, 1872, <i>Plectiscus</i>)</p>							England, Scotland, Ireland
300027	Animalia		Arthropoda			Insecta			Hymenoptera			Ichneumonoidea	Ichneumonidae	ADELOGNATHINAE			Adelognathus		pilosus				Thomson, 1888								England
300028	Animalia		Arthropoda			Insecta			Hymenoptera			Ichneumonoidea	Ichneumonidae	ADELOGNATHINAE			Adelognathus		punctulatus				Thomson, 1883	<p style="margin-left: 40px;"><i>chrysopygus</i> 0</p><p style="margin-left: 40px;"><i>pallipes</i> Holmgren, 1857</p><p style="margin-left: 40px;"><i>dimidiatus</i> Thomson, 1888</p><p style="margin-left: 40px;"><i>pallidipes</i> Dalla Torre, 1901</p>							England, Ireland
300029	Animalia		Arthropoda			Insecta			Hymenoptera			Ichneumonoidea	Ichneumonidae	ADELOGNATHINAE			Adelognathus		pusillus				Holmgren, 1857								England, Wales, Ireland
300030	Animalia		Arthropoda			Insecta			Hymenoptera			Ichneumonoidea	Ichneumonidae	ADELOGNATHINAE			Adelognathus		stelfoxi				Fitton, Gauld &amp; Shaw, 1982								England, Scotland, Wales, Ireland		added by Fitton et al. (1982); Ely (2001)
300031	Animalia		Arthropoda			Insecta			Hymenoptera			Ichneumonoidea	Ichneumonidae	ADELOGNATHINAE			Adelognathus		tenthredinarum				(Giraud, 1872)	<p style="margin-left: 40px;"><i>Plectiscus tenthredinarum</i> Giraud, 1872</p><p style="margin-left: 40px;"><i>nigricornis</i> Thomson, 1888</p>							England
300032	Animalia		Arthropoda			Insecta			Hymenoptera			Ichneumonoidea	Ichneumonidae	ADELOGNATHINAE			Adelognathus		tetratinctorius				(Thunberg, 1824)	<p style="margin-left: 40px;"><i>Ichneumon tetratinctorius</i> Thunberg, 1824</p><p style="margin-left: 40px;"><i>fasciatus</i> Thomson, 1883</p><p style="margin-left: 40px;"><i>scabriculus</i> Thomson, 1883</p>							England, Ireland
300033	Animalia		Arthropoda			Insecta			Hymenoptera			Ichneumonoidea	Ichneumonidae	ADELOGNATHINAE			Adelognathus		thomsoni				Schmiedeknecht, 1911	<p style="margin-left: 40px;"><i>thuringiacus</i> Schmiedeknecht, 1911</p>							England, Ireland
300034	Animalia		Arthropoda			Insecta			Hymenoptera			Ichneumonoidea	Ichneumonidae	AGRIOTYPINAE									Haliday, 1838										Distribution data from Bennett (2001), Howe &amp; Howe (2005) and the collections of the NMS.
300035	Animalia		Arthropoda			Insecta			Hymenoptera			Ichneumonoidea	Ichneumonidae	AGRIOTYPINAE			Agriotypus						Curtis, 1832	<p style="margin-left: 40px;"><i>CROTOPUS</i> Holmgren, 1859</p><p style="margin-left: 40px;"><i>ATOPOTYPUS</i> Chao, 1992</p>
300036	Animalia		Arthropoda			Insecta			Hymenoptera			Ichneumonoidea	Ichneumonidae	AGRIOTYPINAE			Agriotypus		armatus				Curtis, 1832	<p style="margin-left: 40px;"><i>abnormis</i> (Holmgren, 1859, <i>Crotopus</i>)</p>							England, Scotland, Wales
300037	Animalia		Arthropoda			Insecta			Hymenoptera			Ichneumonoidea	Ichneumonidae	ALOMYINAE									Förster, 1869										Alomya has frequently been placed in its own subfamily, Alomyinae (e.g. Perkins, 1959), or in a separate tribe within the Ichneumoninae (Diller, 1981; Selfa &amp; Diller, 1994) but a close relationship with Colpognathus and Centeterus was proposed by Wahl &amp; Mason (1995), with the result that the ichneumonine tribe here called Phaeogenini took the name Alomyini. Based on the molecular phylogen…
300038	Animalia		Arthropoda			Insecta			Hymenoptera			Ichneumonoidea	Ichneumonidae	ALOMYINAE			Alomya						Panzer, 1806	<p style="margin-left: 40px;"><i>ALOMYIA</i> misspelling</p><p style="margin-left: 40px;"><i>HALOMYA</i> Billberg, 1820</p>									Distribution data from Perkins (1952, 1959) and the NMS.
300039	Animalia		Arthropoda			Insecta			Hymenoptera			Ichneumonoidea	Ichneumonidae	ALOMYINAE			Alomya		debellator				(Fabricius, 1775)	<p style="margin-left: 40px;"><i>Ichneumon debellator</i> Fabricius, 1775</p><p style="margin-left: 40px;"><i>fischeri</i> (Schrank, 1776, <i>Ichneumon</i>)</p><p style="margin-left: 40px;"><i>trituberculata</i> (Gmelin, 1790, <i>Ichneumon</i>)</p><p style="margin-left: 40px;"><i>ovator</i> (Fabricius, 1793, <i>Ichneumon</i>)</p><p style="margin-left: 40px;"><i>victor</i> Curtis, 1826</p><p style…							England, Scotland, Ireland, Isle of Man
300040	Animalia		Arthropoda			Insecta			Hymenoptera			Ichneumonoidea	Ichneumonidae	ALOMYINAE			Alomya		semiflava				Stephens, 1835	<p style="margin-left: 40px;"><i>minor</i> Ulbricht, 1909</p><p style="margin-left: 40px;"><i>minor</i> Ulbricht, 1911</p>							England
300041	Animalia		Arthropoda			Insecta			Hymenoptera			Ichneumonoidea	Ichneumonidae	ANOMALONINAE									Viereck, 1918	<p style="margin-left: 40px;"><i>ANOMALINAE</i> misspelling</p>									Distribution data mostly taken from the collections of the NMS and NHM, supplemented by Gauld &amp; Mitchell (1977a), unless noted otherwise. Most of the NMS and some of the NHM material has been identified recently by H. Schnee.
300042	Animalia		Arthropoda			Insecta			Hymenoptera			Ichneumonoidea	Ichneumonidae	ANOMALONINAE	ANOMALONINI								Viereck, 1918	<p style="margin-left: 40px;"><i>ANOMALINI</i> misspelling</p>
300043	Animalia		Arthropoda			Insecta			Hymenoptera			Ichneumonoidea	Ichneumonidae	ANOMALONINAE	ANOMALONINI		Anomalon						Panzer, 1804	<p style="margin-left: 40px;"><i>TRACHYNOTUS</i> Gravenhorst, 1829</p><p style="margin-left: 40px;"><i>OCHLERUS</i> Gistel, 1848</p><p style="margin-left: 40px;"><i>NOTOTRACHYS</i> Marshall, 1872</p><p style="margin-left: 40px;"><i>ANOMALUM</i> Schulz, 1906</p><p style="margin-left: 40px;"><i>TRACHYOPTERUS</i> Morley, 1912</p><p style="margin-left: 40px;"><i>PSEUDONOTOTRACHYS</i> Meyer, 1930</p><…
300044	Animalia		Arthropoda			Insecta			Hymenoptera			Ichneumonoidea	Ichneumonidae	ANOMALONINAE	ANOMALONINI		Anomalon		cruentatum				(Geoffroy, 1785)	<p style="margin-left: 40px;"><i>Ichneumon cruentatus</i> Geoffroy, 1785</p><p style="margin-left: 40px;"><i>petiolatum</i> (Geoffroy, 1785, <i>Ichneumon</i>)</p><p style="margin-left: 40px;"><i>foliator</i> (Fabricius, 1798, <i>Ophion</i>)</p><p style="margin-left: 40px;"><i>cruentatum</i> Panzer, 1804</p><p style="margin-left: 40px;"><i>humerale</i> (Brullé, 1832, <i>Trachynotus</i>)</p><p styl…							England
300045	Animalia		Arthropoda			Insecta			Hymenoptera			Ichneumonoidea	Ichneumonidae	ANOMALONINAE	GRAVENHORSTIINI								Enderlein, 1912	<p style="margin-left: 40px;"><i>THERIONINI</i> Viereck, 1918</p>									Species of Gravenhorstiini excluded from the British and Irish list: [PERISPHINCTER Townes, 1961 brevicollis (Wesmael, 1849, Anomalon)] Gauld &amp; Mitchell (1977a) recorded one specimen of brevicollis from Killiecrankie, Scotland, as a species of Agrypon. As this species is now included in Perisphincter (Schnee, 1978), a genus which Gauld knew at the time, and the specimen is lost (M.R. Shaw, pe…
300046	Animalia		Arthropoda			Insecta			Hymenoptera			Ichneumonoidea	Ichneumonidae	ANOMALONINAE	GRAVENHORSTIINI		Agrypon						Förster, 1860	<p style="margin-left: 40px;"><i>AGRYPUM</i> Schulz, 1906</p>									species of Agrypon excluded from the British and Irish list:[interruptus (Desvignes, 1856, Anomalon] Listed as a doubtfully placed species of Agrypon by Fitton (1978), but Gauld &amp; Mitchell (1977a) had established that this species is actually an exotic cremastine. Currently listed in Yu &amp; Horstmann (1997) as a doubtfully placed species of Cremastus.
300047	Animalia		Arthropoda			Insecta			Hymenoptera			Ichneumonoidea	Ichneumonidae	ANOMALONINAE	GRAVENHORSTIINI		Agrypon		anomelas				(Gravenhorst, 1829)	<p style="margin-left: 40px;"><i>Anomalon anomelas</i> Gravenhorst, 1829</p><p style="margin-left: 40px;"><i>anomalas</i> misspelling</p><p style="margin-left: 40px;"><i>furtivum</i> Förster, 1860</p><p style="margin-left: 40px;"><i>trochanteratum</i> (Holmgren, 1860, <i>Anomalon</i>)</p><p style="margin-left: 40px;"><i>rufipes</i> Kiss, 1926</p>							England		George (1978) provides information on its occurrence in Britain.
300048	Animalia		Arthropoda			Insecta			Hymenoptera			Ichneumonoidea	Ichneumonidae	ANOMALONINAE	GRAVENHORSTIINI		Agrypon		anxium				(Wesmael, 1849)	<p style="margin-left: 40px;"><i>Anomalon anxium</i> Wesmael, 1849</p><p style="margin-left: 40px;"><i>pictum</i> Kiss, 1924</p>							England, Scotland, Wales, Ireland
300049	Animalia		Arthropoda			Insecta			Hymenoptera			Ichneumonoidea	Ichneumonidae	ANOMALONINAE	GRAVENHORSTIINI		Agrypon		batis				(Ratzeburg, 1855)	<p style="margin-left: 40px;"><i>Anomalon batis</i> Ratzeburg, 1855</p><p style="margin-left: 40px;"><i>serpentinum</i> Förster, 1860</p><p style="margin-left: 40px;"><i>stenostigma</i> (Thomson, 1892, <i>Anomalon</i>)</p><p style="margin-left: 40px;"><i>segne</i> (Tosquinet, 1896, <i>Anomalon</i>)</p>							England, Scotland, Ireland		NMS, NHM, det. Schnee, added here
300050	Animalia		Arthropoda			Insecta			Hymenoptera			Ichneumonoidea	Ichneumonidae	ANOMALONINAE	GRAVENHORSTIINI		Agrypon		brachycerum				Hellén, 1950								England, Scotland		NMS, NHM, det. Schnee, added here. Listed as a synonym of anxium in Yu &amp; Horstmann (1997).
300051	Animalia		Arthropoda			Insecta			Hymenoptera			Ichneumonoidea	Ichneumonidae	ANOMALONINAE	GRAVENHORSTIINI		Agrypon		canaliculatum				(Ratzeburg, 1844)	<p style="margin-left: 40px;"><i>Anomalon canaliculatum</i> Ratzeburg, 1844</p>							England, Scotland		NMS, NHM, det. Schnee, added here. Misidentified canaliculatum of authors is Habronyx nigricornis (Wesm.).
300052	Animalia		Arthropoda			Insecta			Hymenoptera			Ichneumonoidea	Ichneumonidae	ANOMALONINAE	GRAVENHORSTIINI		Agrypon		clandestinum				(Gravenhorst, 1829)	<p style="margin-left: 40px;"><i>Anomalon clandestinum</i> Gravenhorst, 1829</p><p style="margin-left: 40px;"><i>delarvatum</i> misident.</p><p style="margin-left: 40px;"><i>capillosum</i> (Hartig, 1838, <i>Anomalon</i>)</p><p style="margin-left: 40px;"><i>affine</i> (Holmgren, 1857, <i>Anomalon</i>)</p><p style="margin-left: 40px;"><i>brachypterum</i> Förster, 1860</p><p style="margin-left: 40px…							England, Scotland, Ireland, Isle of Man
300053	Animalia		Arthropoda			Insecta			Hymenoptera			Ichneumonoidea	Ichneumonidae	ANOMALONINAE	GRAVENHORSTIINI		Agrypon		flaveolatum				(Gravenhorst, 1807)	<p style="margin-left: 40px;"><i>Ophion flaveolatum</i> Gravenhorst, 1807</p><p style="margin-left: 40px;"><i>cribrator</i> (Thunberg, 1824, <i>Ichneumon</i>)</p><p style="margin-left: 40px;"><i>laedator</i> (Thunberg, 1824, <i>Ichneumon</i>)</p><p style="margin-left: 40px;"><i>arquatum</i> (Gravenhorst, 1829, <i>Anomalon</i>)</p><p style="margin-left: 40px;"><i>septentrionale</i> (Holmgren, 1857…							England, Scotland, Wales, Ireland
300054	Animalia		Arthropoda			Insecta			Hymenoptera			Ichneumonoidea	Ichneumonidae	ANOMALONINAE	GRAVENHORSTIINI		Agrypon		flexorium				(Thunberg, 1824)	<p style="margin-left: 40px;"><i>Ichneumon flexorium</i> Thunberg, 1824</p><p style="margin-left: 40px;"><i>tenuicorne</i> (Gravenhorst, 1829, <i>Anomalon</i>)</p><p style="margin-left: 40px;"><i>subclavatum</i> Förster, 1860</p><p style="margin-left: 40px;"><i>anaitidis</i> (Szépligeti, 1899, <i>Labrorychus</i>)</p><p style="margin-left: 40px;"><i>sibiricum</i> (Shestakov, 1923, <i>Labrorychus</…							England, Scotland, Wales, Ireland		Agrypon polyxenae (Szépligeti, 1899, Labrorychus) removed from synonymy by Schnee (2008).
300055	Animalia		Arthropoda			Insecta			Hymenoptera			Ichneumonoidea	Ichneumonidae	ANOMALONINAE	GRAVENHORSTIINI		Agrypon		gracilipes				(Curtis, 1839)	<p style="margin-left: 40px;"><i>Therion gracilipes</i> Curtis, 1839</p><p style="margin-left: 40px;"><i>debile</i> (Wesmael, 1849, <i>Anomalon</i>)</p><p style="margin-left: 40px;"><i>meridionator</i> Aubert, 1964</p>							England, Wales
300056	Animalia		Arthropoda			Insecta			Hymenoptera			Ichneumonoidea	Ichneumonidae	ANOMALONINAE	GRAVENHORSTIINI		Agrypon		interstitiale				Schnee, 1989								England, Scotland		NMS, NHM, det. Schnee, added here
300057	Animalia		Arthropoda			Insecta			Hymenoptera			Ichneumonoidea	Ichneumonidae	ANOMALONINAE	GRAVENHORSTIINI		Agrypon		minutum				(Bridgman &amp; Fitch, 1884)	<p style="margin-left: 40px;"><i>Anomalon minutum</i> Bridgman &amp; Fitch, 1884</p><p style="margin-left: 40px;"><i>minutum</i> (Bridgman, 1884, <i>Anomalon</i>)</p>							England, Scotland, Wales		Listed as a synonym of anxium (Wesm.) in Yu &amp; Horstmann (1997), treated by Schnee as a valid species, but unpublished.
300058	Animalia		Arthropoda			Insecta			Hymenoptera			Ichneumonoidea	Ichneumonidae	ANOMALONINAE	GRAVENHORSTIINI		Agrypon		rugifer				(Thomson, 1894)	<p style="margin-left: 40px;"><i>Anomalon rugifer</i> Thomson, 1894</p>							Wales		NMS, det. Schnee, added here
300059	Animalia		Arthropoda			Insecta			Hymenoptera			Ichneumonoidea	Ichneumonidae	ANOMALONINAE	GRAVENHORSTIINI		Agrypon		varitarsum				(Wesmael, 1849)	<p style="margin-left: 40px;"><i>Anomalon varitarsum</i> Wesmael, 1849</p><p style="margin-left: 40px;"><i>cognatum</i> Förster, 1860</p><p style="margin-left: 40px;"><i>nigripes</i> (Bridgman, 1887, <i>Anomalon</i>)</p><p style="margin-left: 40px;"><i>variitarsum</i> Dalla Torre, 1901</p>							England, Scotland, Ireland
300060	Animalia		Arthropoda			Insecta			Hymenoptera			Ichneumonoidea	Ichneumonidae	ANOMALONINAE	GRAVENHORSTIINI		Agrypon		sp.				H								England, Wales		NMS, NHM, det. Schnee, added here
300061	Animalia		Arthropoda			Insecta			Hymenoptera			Ichneumonoidea	Ichneumonidae	ANOMALONINAE	GRAVENHORSTIINI		Aphanistes						Förster, 1869	<p style="margin-left: 40px;"><i>ANOCHILACRUM</i> Enderlein, 1921</p>
300062	Animalia		Arthropoda			Insecta			Hymenoptera			Ichneumonoidea	Ichneumonidae	ANOMALONINAE	GRAVENHORSTIINI		Aphanistes		bellicosus				(Wesmael, 1849)	<p style="margin-left: 40px;"><i>Anomalon bellicosum</i> Wesmael, 1849</p>							England		NMS, det. Schnee, added here
300063	Animalia		Arthropoda			Insecta			Hymenoptera			Ichneumonoidea	Ichneumonidae	ANOMALONINAE	GRAVENHORSTIINI		Aphanistes		gliscens				(Hartig, 1838)	<p style="margin-left: 40px;"><i>Anomalon gliscens</i> Hartig, 1838</p><p style="margin-left: 40px;"><i>bellicosus</i> misident.</p><p style="margin-left: 40px;"><i>xanthopus</i> misident.</p><p style="margin-left: 40px;"><i>armatus</i> (Wesmael, 1849, <i>Anomalon</i>)</p>							England, Scotland, Wales
300064	Animalia		Arthropoda			Insecta			Hymenoptera			Ichneumonoidea	Ichneumonidae	ANOMALONINAE	GRAVENHORSTIINI		Aphanistes		ruficornis				(Gravenhorst, 1829)	<p style="margin-left: 40px;"><i>Anomalon ruficorne</i> Gravenhorst, 1829</p><p style="margin-left: 40px;"><i>excavatus</i> (Ratzeburg, 1848, <i>Anomalon</i>)</p><p style="margin-left: 40px;"><i>wesmaeli</i> (Holmgren, 1856, <i>Anomalon</i>)</p>							England, Scotland, Wales, Ireland
300065	Animalia		Arthropoda			Insecta			Hymenoptera			Ichneumonoidea	Ichneumonidae	ANOMALONINAE	GRAVENHORSTIINI		Atrometus						Förster, 1869
300066	Animalia		Arthropoda			Insecta			Hymenoptera			Ichneumonoidea	Ichneumonidae	ANOMALONINAE	GRAVENHORSTIINI		Atrometus		?insignis				Förster, 1878	<p style="margin-left: 40px;"><i>rubricatus</i> Förster, 1878</p><p style="margin-left: 40px;"><i>trachynotus</i> (Brauns, 1895, <i>Anomalon</i>)</p><p style="margin-left: 40px;"><i>melanosoma</i> Szépligeti, 1899</p><p style="margin-left: 40px;"><i>pulchellator</i> Aubert, 1971</p>									No British specimen could be located in the depositories cited by Gauld &amp; Mitchell (1977a) (M.R. Shaw, pers comm.).
300067	Animalia		Arthropoda			Insecta			Hymenoptera			Ichneumonoidea	Ichneumonidae	ANOMALONINAE	GRAVENHORSTIINI		Barylypa						Förster, 1869	<p style="margin-left: 40px;"><i>LAPHYCTES</i> Förster, 1869</p><p style="margin-left: 40px;"><i>SARNTHEINIA</i> Dalla Torre, 1901</p><p style="margin-left: 40px;"><i>HADROMANUS</i> Szépligeti, 1905</p><p style="margin-left: 40px;"><i>MAGNIBUCCA</i> Morley, 1913</p><p style="margin-left: 40px;"><i>TROCHISCOMERUS</i> Meyer, 1931</p>
300068	Animalia		Arthropoda			Insecta			Hymenoptera			Ichneumonoidea	Ichneumonidae	ANOMALONINAE	GRAVENHORSTIINI		Barylypa		delictor				(Thunberg, 1824)	<p style="margin-left: 40px;"><i>Ichneumon delictor</i> Thunberg, 1824</p><p style="margin-left: 40px;"><i>perspicillator</i> (Gravenhorst, 1829, <i>Anomalon</i>)</p><p style="margin-left: 40px;"><i>affinis</i> (Lucas, 1849, <i>Anomalon</i>)</p><p style="margin-left: 40px;"><i>menyanthidis</i> (Boie, 1855, <i>Anomalon</i>)</p><p style="margin-left: 40px;"><i>mesozona</i> (Förster, 1878, <i>Laphyc…							England, Scotland, Wales
300069	Animalia		Arthropoda			Insecta			Hymenoptera			Ichneumonoidea	Ichneumonidae	ANOMALONINAE	GRAVENHORSTIINI		Barylypa		propugnator				(Förster, 1855)	<p style="margin-left: 40px;"><i>Anomalon propugnator</i> Förster, 1855</p><p style="margin-left: 40px;"><i>insidiator</i> (Förster, 1878, <i>Laphyctes</i>)</p><p style="margin-left: 40px;"><i>carinata</i> (Brischke, 1880, <i>Anomalon</i>)</p><p style="margin-left: 40px;"><i>cylindrica</i> (Bridgman &amp; Fitch, 1884, <i>Anomalon</i>)</p><p style="margin-left: 40px;"><i>cylindrica</i> (Bridgman, …							England, Wales, Ireland		Listed as a species of Erigorgus in Yu &amp; Horstmann (1997), transferred to Barylypa by Schnee (2008).
300070	Animalia		Arthropoda			Insecta			Hymenoptera			Ichneumonoidea	Ichneumonidae	ANOMALONINAE	GRAVENHORSTIINI		Barylypa		rubricator				(Szépligeti, 1899)	<p style="margin-left: 40px;"><i>Laphyctes rubricator</i> Szépligeti, 1899</p><p style="margin-left: 40px;"><i>rubricatrix</i> (Schulz, 1906, <i>Sarntheinia</i>)</p><p style="margin-left: 40px;"><i>rossica</i> Meyer, 1935</p>							England		NHM, Hunterian, det. Schnee, added here
300071	Animalia		Arthropoda			Insecta			Hymenoptera			Ichneumonoidea	Ichneumonidae	ANOMALONINAE	GRAVENHORSTIINI		Barylypa		?uniguttata				(Gravenhorst, 1829)	<p style="margin-left: 40px;"><i>Anomalon uniguttatum</i> Gravenhorst, 1829</p>							England		Although Gauld &amp; Mitchell (1977a) record uniguttata as British on the basis of one specimen from Norfolk, no British specimen could be located in the depositories cited by Gauld &amp; Mitchell (M.R. Shaw, pers comm.); Gauld was not aware at the time of the presence of rubricator in Britain.
300072	Animalia		Arthropoda			Insecta			Hymenoptera			Ichneumonoidea	Ichneumonidae	ANOMALONINAE	GRAVENHORSTIINI		Erigorgus						Förster, 1869	<p style="margin-left: 40px;"><i>SYMPRATIS</i> Förster, 1869</p>									Although Gauld (1976a; 1997) regarded Erigorgus as a subgenus of Gravenhorstia, most recent works regard it as a separate genus, a position followed by Yu &amp; Horstmann (1997). As the relative merits of genus versus subgenus are rather subjective I have followed the majority opinion.
300073	Animalia		Arthropoda			Insecta			Hymenoptera			Ichneumonoidea	Ichneumonidae	ANOMALONINAE	GRAVENHORSTIINI		Erigorgus		cerinops				(Gravenhorst, 1829)	<p style="margin-left: 40px;"><i>Anomalon cerinops</i> Gravenhorst, 1829</p><p style="margin-left: 40px;"><i>flavifrons</i> (Gravenhorst, 1807, <i>Ophion</i>)</p><p style="margin-left: 40px;"><i>xantha</i> (Boie, 1855, <i>Anomalon</i>)</p><p style="margin-left: 40px;"><i>facialis</i> (Boie, 1857, <i>Campoplex</i>)</p><p style="margin-left: 40px;"><i>lapponicus</i> (Thomson, 1892, <i>Anomalon</i>)…							England, Scotland, Wales, Ireland
300074	Animalia		Arthropoda			Insecta			Hymenoptera			Ichneumonoidea	Ichneumonidae	ANOMALONINAE	GRAVENHORSTIINI		Erigorgus		fibulator				(Gravenhorst, 1829)	<p style="margin-left: 40px;"><i>Anomalon fibulator</i> Gravenhorst, 1829</p><p style="margin-left: 40px;"><i>NHM, det.</i> Schnee, added</p><p style="margin-left: 40px;"><i>claripennis</i> (Thomson, 1892, <i>Anomalon</i>)</p>							England, Wales		NHM, det. Schnee, added here
300075	Animalia		Arthropoda			Insecta			Hymenoptera			Ichneumonoidea	Ichneumonidae	ANOMALONINAE	GRAVENHORSTIINI		Erigorgus		foersteri				(Mocsáry, 1897)	<p style="margin-left: 40px;"><i>Anomalon foersteri</i> Mocsáry, 1897</p><p style="margin-left: 40px;"><i>melanops</i> misident.</p><p style="margin-left: 40px;"><i>brevicorne</i> (Förster, 1855, <i>Anomalon</i>)</p>									NMS, det. Schnee, added here; reared by M.R. Shaw: Bradwell Village, Burford, Oxon. The name foersteri was overlooked by Yu &amp; Horstmann (1997) and other authors (Schnee, 2008).
300076	Animalia		Arthropoda			Insecta			Hymenoptera			Ichneumonoidea	Ichneumonidae	ANOMALONINAE	GRAVENHORSTIINI		Erigorgus		melanops				(Förster, 1855)	<p style="margin-left: 40px;"><i>Anomalon melanops</i> Förster, 1855</p><p style="margin-left: 40px;"><i>melanobata</i> misident.</p><p style="margin-left: 40px;"><i>varians</i> (Brauns, 1895, <i>Anomalon</i>)</p><p style="margin-left: 40px;"><i>flavimana</i> (Szépligeti, 1899, <i>Erigorgus</i>)</p><p style="margin-left: 40px;"><i>interstitialis</i> (Szépligeti, 1899, <i>Erigorgus</i>)</p><p styl…							England, Scotland
300077	Animalia		Arthropoda			Insecta			Hymenoptera			Ichneumonoidea	Ichneumonidae	ANOMALONINAE	GRAVENHORSTIINI		Erigorgus		procerus				(Gravenhorst, 1829)	<p style="margin-left: 40px;"><i>Anomalon procerum</i> Gravenhorst, 1829</p>							England		NHM, det. Schnee, added here; various authors included procerus as a British species but Gauld &amp; Mitchell (1977a) did not see any British or Irish material and there were no such specimens in NHM or NMS at that time.
300078	Animalia		Arthropoda			Insecta			Hymenoptera			Ichneumonoidea	Ichneumonidae	ANOMALONINAE	GRAVENHORSTIINI		Erigorgus		varicornis				(Thomson, 1894)	<p style="margin-left: 40px;"><i>Anomalon varicorne</i> Thomson, 1894</p>							England, Scotland		NHM, det Schnee, added here. Listed as a synonym of propugnator (Förster) in Yu &amp; Horstmann (1997).
300079	Animalia		Arthropoda			Insecta			Hymenoptera			Ichneumonoidea	Ichneumonidae	ANOMALONINAE	GRAVENHORSTIINI		Gravenhorstia						Boie, 1836	<p style="margin-left: 40px;"><i>ODONTOPSIS</i> Förster, 1869</p>
300080	Animalia		Arthropoda			Insecta			Hymenoptera			Ichneumonoidea	Ichneumonidae	ANOMALONINAE	GRAVENHORSTIINI		Gravenhorstia		picta				Boie, 1836	<p style="margin-left: 40px;"><i>fasciata</i> (Giraud, 1857, <i>Anomalon</i>)</p><p style="margin-left: 40px;"><i>fasciata</i> (Marshall, 1873, <i>Anomalon</i>)</p><p style="margin-left: 40px;"><i>septemfasciata</i> (Taschenberg, 1875, <i>Ophion</i>)</p><p style="margin-left: 40px;"><i>picta</i> (Rudow, 1882, <i>Anomalon</i>)</p>							England
300081	Animalia		Arthropoda			Insecta			Hymenoptera			Ichneumonoidea	Ichneumonidae	ANOMALONINAE	GRAVENHORSTIINI		Habrocampulum						Gauld, 1976
300082	Animalia		Arthropoda			Insecta			Hymenoptera			Ichneumonoidea	Ichneumonidae	ANOMALONINAE	GRAVENHORSTIINI		Habrocampulum		biguttatum				(Gravenhorst, 1829)	<p style="margin-left: 40px;"><i>Anomalon biguttatum</i> Gravenhorst, 1829</p>							England
300083	Animalia		Arthropoda			Insecta			Hymenoptera			Ichneumonoidea	Ichneumonidae	ANOMALONINAE	GRAVENHORSTIINI		Habronyx						Förster, 1869
300084	Animalia		Arthropoda			Insecta			Hymenoptera			Ichneumonoidea	Ichneumonidae	ANOMALONINAE	GRAVENHORSTIINI		Habronyx	Camposcopus					Förster, 1869	<p style="margin-left: 40px;"><i>LABRORYCHUS</i> Förster, 1869</p><p style="margin-left: 40px;"><i>BLAPTOCAMPUS</i> Thomson, 1892</p>
300085	Animalia		Arthropoda			Insecta			Hymenoptera			Ichneumonoidea	Ichneumonidae	ANOMALONINAE	GRAVENHORSTIINI		Habronyx	Camposcopus	nigricornis				(Wesmael, 1849)	<p style="margin-left: 40px;"><i>Anomalon nigricorne</i> Wesmael, 1849</p><p style="margin-left: 40px;"><i>canaliculatus</i> misident.</p><p style="margin-left: 40px;"><i>melanomerus</i> (Förster, 1860, <i>Agrypon</i>)</p><p style="margin-left: 40px;"><i>maidan</i> (Shestakov, 1923, <i>Blaptocampus</i>)</p>							England, Scotland, Wales, Ireland
300086	Animalia		Arthropoda			Insecta			Hymenoptera			Ichneumonoidea	Ichneumonidae	ANOMALONINAE	GRAVENHORSTIINI		Habronyx	Camposcopus	perspicuus				(Wesmael, 1849)	<p style="margin-left: 40px;"><i>Anomalon perspicuum</i> Wesmael, 1849</p>							England, Scotland, Wales
300087	Animalia		Arthropoda			Insecta			Hymenoptera			Ichneumonoidea	Ichneumonidae	ANOMALONINAE	GRAVENHORSTIINI		Habronyx	Habronyx					Förster, 1869	<p style="margin-left: 40px;"><i>ACANTHOSTOMA</i> Kriechbaumer, 1895</p><p style="margin-left: 40px;"><i>MACROSTEMMA</i> Shestakov, 1923</p>
300088	Animalia		Arthropoda			Insecta			Hymenoptera			Ichneumonoidea	Ichneumonidae	ANOMALONINAE	GRAVENHORSTIINI		Habronyx	Habronyx	heros				(Wesmael, 1849)	<p style="margin-left: 40px;"><i>Anomalon heros</i> Wesmael, 1849</p><p style="margin-left: 40px;"><i>mirabilis</i> (Desvignes, 1856, <i>Anomalon</i>)</p><p style="margin-left: 40px;"><i>gravenhorstii</i> Förster, 1860</p><p style="margin-left: 40px;"><i>gigas</i> (Kriechbaumer, 1880, <i>Anomalon</i>)</p><p style="margin-left: 40px;"><i>oti</i> (Kriechbaumer, 1895, <i>Anomalon</i>)</p>							England
300089	Animalia		Arthropoda			Insecta			Hymenoptera			Ichneumonoidea	Ichneumonidae	ANOMALONINAE	GRAVENHORSTIINI		Heteropelma						Wesmael, 1849	<p style="margin-left: 40px;"><i>SCHIZOLOMA</i> Wesmael, 1849</p><p style="margin-left: 40px;"><i>SCHIZOPOMA</i> Förster, 1869</p>
300090	Animalia		Arthropoda			Insecta			Hymenoptera			Ichneumonoidea	Ichneumonidae	ANOMALONINAE	GRAVENHORSTIINI		Heteropelma		amictum				(Fabricius, 1775)	<p style="margin-left: 40px;"><i>Ichneumon amictus</i> Fabricius, 1775</p><p style="margin-left: 40px;"><i>xanthopus</i> (Schrank, 1781, <i>Ichneumon</i>)</p><p style="margin-left: 40px;"><i>amictor</i> (Thunberg, 1824, <i>Ichneumon</i>)</p><p style="margin-left: 40px;"><i>xanthopor</i> (Thunberg, 1824, <i>Ichneumon</i>)</p><p style="margin-left: 40px;"><i>capitatum</i> (Desvignes, 1856, <i>Anoma…							England, Scotland, Ireland, Isle of Man		distribution data from Gauld (1976b)
300091	Animalia		Arthropoda			Insecta			Hymenoptera			Ichneumonoidea	Ichneumonidae	ANOMALONINAE	GRAVENHORSTIINI		Heteropelma		megarthrum				(Ratzeburg, 1848)	<p style="margin-left: 40px;"><i>Anomalon megarthrum</i> Ratzeburg, 1848</p><p style="margin-left: 40px;"><i>calcator</i> Wesmael, 1849</p><p style="margin-left: 40px;"><i>scabridum</i> (Boie, 1855, <i>Anomalon</i>)</p><p style="margin-left: 40px;"><i>megalarthrum</i> (Schulz, 1906, <i>Anomalon</i>)</p><p style="margin-left: 40px;"><i>nigriscutum</i> (Fahringer, 1941, <i>Anomalon</i>)</p>							England, Scotland, Ireland
300092	Animalia		Arthropoda			Insecta			Hymenoptera			Ichneumonoidea	Ichneumonidae	ANOMALONINAE	GRAVENHORSTIINI		Parania						Morley, 1913
300093	Animalia		Arthropoda			Insecta			Hymenoptera			Ichneumonoidea	Ichneumonidae	ANOMALONINAE	GRAVENHORSTIINI		Parania		geniculata				(Holmgren, 1857)	<p style="margin-left: 40px;"><i>Anomalon geniculatum</i> Holmgren, 1857</p>							England
300094	Animalia		Arthropoda			Insecta			Hymenoptera			Ichneumonoidea	Ichneumonidae	ANOMALONINAE	GRAVENHORSTIINI		Therion						Curtis, 1829	<p style="margin-left: 40px;"><i>THERIUM</i> Agassiz, 1846</p><p style="margin-left: 40px;"><i>EXOCHILUM</i> Wesmael, 1849</p>
300095	Animalia		Arthropoda			Insecta			Hymenoptera			Ichneumonoidea	Ichneumonidae	ANOMALONINAE	GRAVENHORSTIINI		Therion		circumflexum				(Linnaeus, 1758)	<p style="margin-left: 40px;"><i>Ichneumon circumflexus</i> Linnaeus, 1758</p><p style="margin-left: 40px;"><i>brevicorne</i> misident.</p><p style="margin-left: 40px;"><i>ramidulum</i> (Christ, 1791, <i>Ichneumon</i>)</p><p style="margin-left: 40px;"><i>unicolor</i> (Ratzeburg, 1844, <i>Anomalon</i>)</p><p style="margin-left: 40px;"><i>callosum</i> (Shestakov, 1923, <i>Exochilum</i>)</p><p style…							England, Scotland, Wales, Ireland
300096	Animalia		Arthropoda			Insecta			Hymenoptera			Ichneumonoidea	Ichneumonidae	ANOMALONINAE	GRAVENHORSTIINI		Trichomma						Wesmael, 1849	<p style="margin-left: 40px;"><i>TRICHOMELLA</i> Szépligeti, 1910</p>
300097	Animalia		Arthropoda			Insecta			Hymenoptera			Ichneumonoidea	Ichneumonidae	ANOMALONINAE	GRAVENHORSTIINI		Trichomma		enecator				(Rossi, 1790)	<p style="margin-left: 40px;"><i>Ichneumon enecator</i> Rossi, 1790</p><p style="margin-left: 40px;"><i>ruficoxis</i> Förster, 1860</p>							England, Isle of Man
300098	Animalia		Arthropoda			Insecta			Hymenoptera			Ichneumonoidea	Ichneumonidae	ANOMALONINAE	GRAVENHORSTIINI		Trichomma		fulvidens				Wesmael, 1849	<p style="margin-left: 40px;"><i>bituberculatum</i> Schmiedeknecht, 1902</p>							England
300099	Animalia		Arthropoda			Insecta			Hymenoptera			Ichneumonoidea	Ichneumonidae	ANOMALONINAE	GRAVENHORSTIINI		Trichomma		intermedium				Krieger, 1904								England
300100	Animalia		Arthropoda			Insecta			Hymenoptera			Ichneumonoidea	Ichneumonidae	ANOMALONINAE	GRAVENHORSTIINI		Trichomma		occisor				Habermehl, 1909								England
300101	Animalia		Arthropoda			Insecta			Hymenoptera			Ichneumonoidea	Ichneumonidae	BANCHINAE									Wesmael, 1845	<p style="margin-left: 40px;"><i>LISSONOTINAE</i> Förster, 1869</p>									Taxonomy and distribution data follow Brock’s (in prep.) handbook to the British Banchinae, with some additions from NMS, NHM, Aubert (1978) and Fitton (1976). Additional references are given.
300102	Animalia		Arthropoda			Insecta			Hymenoptera			Ichneumonoidea	Ichneumonidae	BANCHINAE	ATROPHINI								Seyrig, 1932	<p style="margin-left: 40px;"><i>LISSONOTINI</i> Förster, 1869</p>
300103	Animalia		Arthropoda			Insecta			Hymenoptera			Ichneumonoidea	Ichneumonidae	BANCHINAE	ATROPHINI		Alloplasta						Förster, 1869	<p style="margin-left: 40px;"><i>ASYMMICTUS</i> Förster, 1869</p><p style="margin-left: 40px;"><i>TRYSICAMPE</i> Förster, 1869</p>
300104	Animalia		Arthropoda			Insecta			Hymenoptera			Ichneumonoidea	Ichneumonidae	BANCHINAE	ATROPHINI		Alloplasta		piceator				(Thunberg, 1824)	<p style="margin-left: 40px;"><i>Ichneumon piceator</i> Thunberg, 1824</p><p style="margin-left: 40px;"><i>creditor</i> (Thunberg, 1824, <i>Ichneumon</i>)</p><p style="margin-left: 40px;"><i>albitarsus</i> (Gravenhorst, 1829, <i>Exetastes</i>)</p><p style="margin-left: 40px;"><i>lata</i> (Gravenhorst, 1829, <i>Exetastes</i>)</p><p style="margin-left: 40px;"><i>murina</i> (Gravenhorst, 1829, <i>Li…							England, Scotland, Ireland
300105	Animalia		Arthropoda			Insecta			Hymenoptera			Ichneumonoidea	Ichneumonidae	BANCHINAE	ATROPHINI		Alloplasta		plantaria				(Gravenhorst, 1829)	<p style="margin-left: 40px;"><i>Phytodietus plantarius</i> Gravenhorst, 1829</p>							England, Wales
300106	Animalia		Arthropoda			Insecta			Hymenoptera			Ichneumonoidea	Ichneumonidae	BANCHINAE	ATROPHINI		Arenetra						Holmgren, 1859	<p style="margin-left: 40px;"><i>LASIOPS</i> Holmgren, 1856</p>
300107	Animalia		Arthropoda			Insecta			Hymenoptera			Ichneumonoidea	Ichneumonidae	BANCHINAE	ATROPHINI		Arenetra		pilosella				(Gravenhorst, 1829)	<p style="margin-left: 40px;"><i>Tryphon pilosellus</i> Gravenhorst, 1829</p>							England, Scotland
300108	Animalia		Arthropoda			Insecta			Hymenoptera			Ichneumonoidea	Ichneumonidae	BANCHINAE	ATROPHINI		Cryptopimpla						Taschenberg, 1863	<p style="margin-left: 40px;"><i>APHANODON</i> Förster, 1869</p><p style="margin-left: 40px;"><i>XENACIS</i> Förster, 1869</p><p style="margin-left: 40px;"><i>XENOCORNIA</i> Schmiedeknecht, 1900</p>
300109	Animalia		Arthropoda			Insecta			Hymenoptera			Ichneumonoidea	Ichneumonidae	BANCHINAE	ATROPHINI		Cryptopimpla		altipes				(Holmgren, 1860)	<p style="margin-left: 40px;"><i>Lissonota altipes</i> Holmgren, 1860</p>							England, Scotland		added by Brock (in prep.). Removed from synomymy with quadrilineata by Brock (in prep.).
300110	Animalia		Arthropoda			Insecta			Hymenoptera			Ichneumonoidea	Ichneumonidae	BANCHINAE	ATROPHINI		Cryptopimpla		anomala				(Holmgren, 1860)	<p style="margin-left: 40px;"><i>Lissonota anomala</i> Holmgren, 1860</p>							England, Scotland, Wales		added by Brock (in prep.)
300111	Animalia		Arthropoda			Insecta			Hymenoptera			Ichneumonoidea	Ichneumonidae	BANCHINAE	ATROPHINI		Cryptopimpla		arvicola				(Gravenhorst, 1829)	<p style="margin-left: 40px;"><i>Lissonota arvicola</i> Gravenhorst, 1829</p><p style="margin-left: 40px;"><i>brachycentra</i> (Gravenhorst, 1829, <i>Lissonota</i>)</p><p style="margin-left: 40px;"><i>kaisdii</i> (Kiss, 1929, <i>Arenetra</i>)</p>							England
300112	Animalia		Arthropoda			Insecta			Hymenoptera			Ichneumonoidea	Ichneumonidae	BANCHINAE	ATROPHINI		Cryptopimpla		calceolata				(Gravenhorst, 1829)	<p style="margin-left: 40px;"><i>Phytodietus calceolatus</i> Gravenhorst, 1829</p><p style="margin-left: 40px;"><i>leptogaster</i> (Holmgren, 1860, <i>Lissonota</i>)</p>							England, Scotland
300113	Animalia		Arthropoda			Insecta			Hymenoptera			Ichneumonoidea	Ichneumonidae	BANCHINAE	ATROPHINI		Cryptopimpla		caligata				(Gravenhorst, 1829)	<p style="margin-left: 40px;"><i>Lissonota caligata</i> Gravenhorst, 1829</p>							England, Ireland
300114	Animalia		Arthropoda			Insecta			Hymenoptera			Ichneumonoidea	Ichneumonidae	BANCHINAE	ATROPHINI		Cryptopimpla		errabunda				(Gravenhorst, 1829)	<p style="margin-left: 40px;"><i>Phytodietus errabundus</i> Gravenhorst, 1829</p>							England, Ireland
300115	Animalia		Arthropoda			Insecta			Hymenoptera			Ichneumonoidea	Ichneumonidae	BANCHINAE	ATROPHINI		Cryptopimpla		hertrichi				Heinrich, 1952								England, Scotland		added by Brock (in prep.)
300116	Animalia		Arthropoda			Insecta			Hymenoptera			Ichneumonoidea	Ichneumonidae	BANCHINAE	ATROPHINI		Cryptopimpla		quadrilineata				(Gravenhorst, 1829)	<p style="margin-left: 40px;"><i>Tryphon quadrilineatus</i> Gravenhorst, 1829</p><p style="margin-left: 40px;"><i>blanda</i> (Gravenhorst, 1829, <i>Phytodietus</i>)</p><p style="margin-left: 40px;"><i>hungarica</i> (Szépligeti, 1899, <i>Xenacis</i>)</p><p style="margin-left: 40px;"><i>vaga</i> (Szépligeti, 1899, <i>Lissonota</i>)</p>							England, Wales
300117	Animalia		Arthropoda			Insecta			Hymenoptera			Ichneumonoidea	Ichneumonidae	BANCHINAE	ATROPHINI		Lissonota						Gravenhorst, 1829	<p style="margin-left: 40px;"><i>LAMPRONOTA</i> Curtis, 1832</p><p style="margin-left: 40px;"><i>STILBONOTA</i> Stephens, 1835</p><p style="margin-left: 40px;"><i>MENISCUS</i> Schiødte, 1839</p><p style="margin-left: 40px;"><i>ASYNIDA</i> Gistel, 1848</p><p style="margin-left: 40px;"><i>AMERSIBIA</i> Förster, 1869</p><p style="margin-left: 40px;"><i>BATHYCETES</i> Förster, 1869</p><p style="margi…									Contra Brock (in prep.), subgenera are not employed as there is little justification for their use and some ‘subgenera’ seem to be of use only in Europe, whereas there is a great variety of species in the wider world referred to Lissonota (Lissonota) by default. Species of Lissonota excluded from British and Irish list: [bilineata Gravenhorst, 1829] J.P. Brock (pers. comm.) has not seen any authe…
300118	Animalia		Arthropoda			Insecta			Hymenoptera			Ichneumonoidea	Ichneumonidae	BANCHINAE	ATROPHINI		Lissonota		accusator				(Fabricius, 1793)	<p style="margin-left: 40px;"><i>Ichneumon accusator</i> Fabricius, 1793</p><p style="margin-left: 40px;"><i>segmentator</i> misident.</p><p style="margin-left: 40px;"><i>rusticator</i> (Thunberg, 1824, <i>Ichneumon</i>)</p><p style="margin-left: 40px;"><i>humeralis</i> (Zetterstedt, 1838, <i>Tryphon</i>)</p><p style="margin-left: 40px;"><i>unicincta</i> Holmgren, 1860</p><p style="margin-left: 4…							England, Ireland		Brock (in prep.) does not explain his use of rusticator as the valid name for the species Horstmann (2001b) refers to as accusator, so the latter is followed here. The name accusator has often been applied to Cylloceria melancholica (Gravenhorst).
300119	Animalia		Arthropoda			Insecta			Hymenoptera			Ichneumonoidea	Ichneumonidae	BANCHINAE	ATROPHINI		Lissonota		admontensis				Strobl, 1902	<p style="margin-left: 40px;"><i>alpina</i> Strobl, 1902</p><p style="margin-left: 40px;"><i>praebellator</i> Aubert, 1967</p>							England, Scotland		added by Brock (in prep.)
300120	Animalia		Arthropoda			Insecta			Hymenoptera			Ichneumonoidea	Ichneumonidae	BANCHINAE	ATROPHINI		Lissonota		anomala				Holmgren, 1860								Ireland
300121	Animalia		Arthropoda			Insecta			Hymenoptera			Ichneumonoidea	Ichneumonidae	BANCHINAE	ATROPHINI		Lissonota		antennalis				Thomson, 1877								England, Wales		added by Brock (in prep.)
300122	Animalia		Arthropoda			Insecta			Hymenoptera			Ichneumonoidea	Ichneumonidae	BANCHINAE	ATROPHINI		Lissonota		argiola				Gravenhorst, 1829	<p style="margin-left: 40px;"><i>eximia</i> Habermehl, 1918</p>							England, Scotland, Wales, Ireland
300123	Animalia		Arthropoda			Insecta			Hymenoptera			Ichneumonoidea	Ichneumonidae	BANCHINAE	ATROPHINI		Lissonota		biguttata				Holmgren, 1860	<p style="margin-left: 40px;"><i>femorata</i> Holmgren, 1860</p><p style="margin-left: 40px;"><i>crassipes</i> Thomson, 1877</p>							England, Ireland
300124	Animalia		Arthropoda			Insecta			Hymenoptera			Ichneumonoidea	Ichneumonidae	BANCHINAE	ATROPHINI		Lissonota		buccator				(Thunberg, 1824)	<p style="margin-left: 40px;"><i>Ichneumon buccator</i> Thunberg, 1824</p><p style="margin-left: 40px;"><i>varicoxa</i> Thomson, 1887</p><p style="margin-left: 40px;"><i>iridipennis</i> Kriechbaumer, 1900</p>							England, Scotland		There is some doubt about the correct name of this speceis as it is not certain which species Thunberg’s type belongs to within the buccator group of species (Brock, in prep.); distribution data from Horstmann (2003a); Brock (in prep.) states that Irish records require confirmation.
300125	Animalia		Arthropoda			Insecta			Hymenoptera			Ichneumonoidea	Ichneumonidae	BANCHINAE	ATROPHINI		Lissonota		canaliculata				(Szépligeti, 1899)	<p style="margin-left: 40px;"><i>Meniscus canaliculatus</i> Szépligeti, 1899</p><p style="margin-left: 40px;"><i>pimplator</i> misident.</p><p style="margin-left: 40px;"><i>flavipes</i> Lucas, 1849</p>							England		added by Brock (in prep.)
300126	Animalia		Arthropoda			Insecta			Hymenoptera			Ichneumonoidea	Ichneumonidae	BANCHINAE	ATROPHINI		Lissonota		carbonaria				Holmgren, 1860	<p style="margin-left: 40px;"><i>melania</i> Holmgren, 1860</p><p style="margin-left: 40px;"><i>artemisiae</i> Tschek, 1871</p>							England, Scotland		Brock (in prep.) states that Irish records require confirmation.
300127	Animalia		Arthropoda			Insecta			Hymenoptera			Ichneumonoidea	Ichneumonidae	BANCHINAE	ATROPHINI		Lissonota		clypealis				Thomson, 1877	<p style="margin-left: 40px;"><i>albobarbata</i> Strobl, 1902</p>							England, Scotland, Ireland
300128	Animalia		Arthropoda			Insecta			Hymenoptera			Ichneumonoidea	Ichneumonidae	BANCHINAE	ATROPHINI		Lissonota		clypeator				(Gravenhorst, 1820)	<p style="margin-left: 40px;"><i>Ichneumon clypeator</i> Gravenhorst, 1820</p><p style="margin-left: 40px;"><i>cylindrator</i> misident.</p><p style="margin-left: 40px;"><i>?coccinea</i> (Christ, 1791, <i>Ichneumon</i>)</p><p style="margin-left: 40px;"><i>unicornis</i> Strobl, 1902</p><p style="margin-left: 40px;"><i>nigrescens</i> Constantineanu, 1929</p><p style="margin-left: 40px;"><i>spectabi…							England, Scotland, Ireland
300129	Animalia		Arthropoda			Insecta			Hymenoptera			Ichneumonoidea	Ichneumonidae	BANCHINAE	ATROPHINI		Lissonota		coracina				(Gmelin, 1790)	<p style="margin-left: 40px;"><i>Ichneumon coracinus</i> Gmelin, 1790</p><p style="margin-left: 40px;"><i>bellator</i> (Gravenhorst, 1807, <i>Ichneumon</i>)</p><p style="margin-left: 40px;"><i>tricoloria</i> (Thunberg, 1824, <i>Ichneumon</i>)</p><p style="margin-left: 40px;"><i>irrigua</i> Thomson, 1888</p><p style="margin-left: 40px;"><i>bellatrix</i> Schulz, 1906</p><p style="margin-left: 40px;…							England, Scotland, Ireland
300130	Animalia		Arthropoda			Insecta			Hymenoptera			Ichneumonoidea	Ichneumonidae	BANCHINAE	ATROPHINI		Lissonota		cruentator				(Panzer, 1809)	<p style="margin-left: 40px;"><i>Alomya cruentator</i> Panzer, 1809</p><p style="margin-left: 40px;"><i>insignita</i> Gravenhorst, 1829</p><p style="margin-left: 40px;"><i>verberans</i> Gravenhorst, 1829</p><p style="margin-left: 40px;"><i>cruentatrix</i> (Schulz, 1906, <i>Alomya</i>)</p><p style="margin-left: 40px;"><i>rufifemur</i> Kiss, 1926</p><p style="margin-left: 40px;"><i>szepligeti</i> K…							England, Ireland
300131	Animalia		Arthropoda			Insecta			Hymenoptera			Ichneumonoidea	Ichneumonidae	BANCHINAE	ATROPHINI		Lissonota		culiciformis				Gravenhorst, 1829	<p style="margin-left: 40px;"><i>lateralis</i> Gravenhorst, 1829</p><p style="margin-left: 40px;"><i>cruenta</i> Vollenhoven, 1858</p><p style="margin-left: 40px;"><i>assimilis</i> Brischke, 1880</p><p style="margin-left: 40px;"><i>sziladyi</i> Kiss, 1926</p>							England, Wales		added by Brock (in prep.)
300132	Animalia		Arthropoda			Insecta			Hymenoptera			Ichneumonoidea	Ichneumonidae	BANCHINAE	ATROPHINI		Lissonota		deversor				Gravenhorst, 1829								England
300133	Animalia		Arthropoda			Insecta			Hymenoptera			Ichneumonoidea	Ichneumonidae	BANCHINAE	ATROPHINI		Lissonota		digestor				(Thunberg, 1824)	<p style="margin-left: 40px;"><i>Ichneumon digestor</i> Thunberg, 1824</p><p style="margin-left: 40px;"><i>vocator</i> (Thunberg, 1824, <i>Ichneumon</i>)</p><p style="margin-left: 40px;"><i>hians</i> Thomson, 1877</p>							England, Scotland
300134	Animalia		Arthropoda			Insecta			Hymenoptera			Ichneumonoidea	Ichneumonidae	BANCHINAE	ATROPHINI		Lissonota		distincta				Bridgman, 1889								England
300135	Animalia		Arthropoda			Insecta			Hymenoptera			Ichneumonoidea	Ichneumonidae	BANCHINAE	ATROPHINI		Lissonota		dubia				Holmgren, 1856	<p style="margin-left: 40px;"><i>jugorum</i> (Strobl, 1903, <i>Mesoleius</i>)</p><p style="margin-left: 40px;"><i>duplanae</i> (Heinrich, 1937, <i>Gibbonota</i>)</p>							England, Scotland		Brock (in prep.) states that Irish records require confirmation.
300136	Animalia		Arthropoda			Insecta			Hymenoptera			Ichneumonoidea	Ichneumonidae	BANCHINAE	ATROPHINI		Lissonota		erythrina				Holmgren, 1860	<p style="margin-left: 40px;"><i>pusilla</i> Habermehl, 1918</p>							Scotland		added by Brock (in prep.)
300137	Animalia		Arthropoda			Insecta			Hymenoptera			Ichneumonoidea	Ichneumonidae	BANCHINAE	ATROPHINI		Lissonota		fletcheri				Bridgman, 1882								England		Brock (in prep.) states that Irish records require confirmation.
300138	Animalia		Arthropoda			Insecta			Hymenoptera			Ichneumonoidea	Ichneumonidae	BANCHINAE	ATROPHINI		Lissonota		folii				Thomson, 1877	<p style="margin-left: 40px;"><i>transversa</i> Bridgman, 1889</p><p style="margin-left: 40px;"><i>areolata</i> (Kiss, 1924, <i>Clistopyga</i>)</p>							England, Ireland
300139	Animalia		Arthropoda			Insecta			Hymenoptera			Ichneumonoidea	Ichneumonidae	BANCHINAE	ATROPHINI		Lissonota		freyi				(Hellén, 1915)	<p style="margin-left: 40px;"><i>Meniscus freyi</i> Hellén, 1915</p><p style="margin-left: 40px;"><i>tuberculata</i> (Hellén, 1915, <i>Meniscus</i>)</p><p style="margin-left: 40px;"><i>sesiae</i> Habermehl, 1918</p>							England		added by Brock (in prep.)
300140	Animalia		Arthropoda			Insecta			Hymenoptera			Ichneumonoidea	Ichneumonidae	BANCHINAE	ATROPHINI		Lissonota		frontalis				(Desvignes, 1856)	<p style="margin-left: 40px;"><i>Lampronota frontalis</i> Desvignes, 1856</p><p style="margin-left: 40px;"><i>canaliculata</i> misident.</p><p style="margin-left: 40px;"><i>sulcator</i> (Morley, 1908, <i>Meniscus</i>)</p>							England, Scotland
300141	Animalia		Arthropoda			Insecta			Hymenoptera			Ichneumonoidea	Ichneumonidae	BANCHINAE	ATROPHINI		Lissonota		fulvipes				(Desvignes, 1856)	<p style="margin-left: 40px;"><i>Lampronota fulvipes</i> Desvignes, 1856</p><p style="margin-left: 40px;"><i>piffardi</i> (Morley, 1908, <i>Meniscus</i>)</p>							England
300142	Animalia		Arthropoda			Insecta			Hymenoptera			Ichneumonoidea	Ichneumonidae	BANCHINAE	ATROPHINI		Lissonota		fundator				(Thunberg, 1824)	<p style="margin-left: 40px;"><i>Ichneumon fundator</i> Thunberg, 1824</p><p style="margin-left: 40px;"><i>sulphurifera</i> Gravenhorst, 1829</p><p style="margin-left: 40px;"><i>rimator</i> Thomson, 1877</p><p style="margin-left: 40px;"><i>affinis</i> (Szépligeti, 1899, <i>Meniscus</i>)</p><p style="margin-left: 40px;"><i>caudata</i> (Szépligeti, 1899, <i>Meniscus</i>)</p><p style="margin-left: 4…							England, Scotland, Ireland
300143	Animalia		Arthropoda			Insecta			Hymenoptera			Ichneumonoidea	Ichneumonidae	BANCHINAE	ATROPHINI		Lissonota		genator				Aubert, 1972								Scotland		added by Brock (in prep.)
300144	Animalia		Arthropoda			Insecta			Hymenoptera			Ichneumonoidea	Ichneumonidae	BANCHINAE	ATROPHINI		Lissonota		gracilenta				Holmgren, 1860								England, Scotland		added by Brock (in prep.)
300145	Animalia		Arthropoda			Insecta			Hymenoptera			Ichneumonoidea	Ichneumonidae	BANCHINAE	ATROPHINI		Lissonota		gracilipes				Thomson, 1877								England		added by Brock (in prep.)
300146	Animalia		Arthropoda			Insecta			Hymenoptera			Ichneumonoidea	Ichneumonidae	BANCHINAE	ATROPHINI		Lissonota		halidayi				Holmgren, 1860								England
300147	Animalia		Arthropoda			Insecta			Hymenoptera			Ichneumonoidea	Ichneumonidae	BANCHINAE	ATROPHINI		Lissonota		histrio				(Fabricius, 1798)	<p style="margin-left: 40px;"><i>Banchus histrio</i> Fabricius, 1798</p><p style="margin-left: 40px;"><i>marginator</i> (Fabricius, 1804, <i>Bassus</i>)</p><p style="margin-left: 40px;"><i>parallela</i> Gravenhorst, 1829</p><p style="margin-left: 40px;"><i>dioszeghyi</i> (Kiss, 1924, <i>Syzeuctus</i>)</p><p style="margin-left: 40px;"><i>nigrobasalis</i> Constantineanu &amp; Pisica, 1960</p>							England, Scotland, Ireland
300148	Animalia		Arthropoda			Insecta			Hymenoptera			Ichneumonoidea	Ichneumonidae	BANCHINAE	ATROPHINI		Lissonota		impressor				Gravenhorst, 1829	<p style="margin-left: 40px;"><i>basalis</i> Brischke, 1865</p><p style="margin-left: 40px;"><i>nigricoxis</i> Ulbricht, 1913</p><p style="margin-left: 40px;"><i>humerella</i> Habermehl, 1918</p>							England		added by Brock (in prep.)
300149	Animalia		Arthropoda			Insecta			Hymenoptera			Ichneumonoidea	Ichneumonidae	BANCHINAE	ATROPHINI		Lissonota		linearis				Gravenhorst, 1829	<p style="margin-left: 40px;"><i>varicornis</i> (Schmiedeknecht, 1900, <i>Campocineta</i>)</p><p style="margin-left: 40px;"><i>incerta</i> Habermehl, 1918</p>							England		Brock (in prep.) states that Irish records require confirmation.
300150	Animalia		Arthropoda			Insecta			Hymenoptera			Ichneumonoidea	Ichneumonidae	BANCHINAE	ATROPHINI		Lissonota		lineata				Gravenhorst, 1829	<p style="margin-left: 40px;"><i>flavovariegatus</i> (Lucas, 1849, <i>Mesoleptus</i>)</p>							England, Wales
300151	Animalia		Arthropoda			Insecta			Hymenoptera			Ichneumonoidea	Ichneumonidae	BANCHINAE	ATROPHINI		Lissonota		lineolaris				(Gmelin, 1790)	<p style="margin-left: 40px;"><i>Ichneumon lineolaris</i> Gmelin, 1790</p><p style="margin-left: 40px;"><i>catenator</i> (Panzer, 1804, <i>Ichneumon</i>)</p><p style="margin-left: 40px;"><i>gladiator</i> (Thunberg, 1824, <i>Ichneumon</i>)</p><p style="margin-left: 40px;"><i>mammillator</i> (Thunberg, 1824, <i>Ichneumon</i>)</p><p style="margin-left: 40px;"><i>signator</i> (Thunberg, 1824, <i>Ichn…							England, Scotland, Ireland, Isle of Man
300152	Animalia		Arthropoda			Insecta			Hymenoptera			Ichneumonoidea	Ichneumonidae	BANCHINAE	ATROPHINI		Lissonota		luffiator				Aubert, 1969								England		added by Brock (in prep.)
300153	Animalia		Arthropoda			Insecta			Hymenoptera			Ichneumonoidea	Ichneumonidae	BANCHINAE	ATROPHINI		Lissonota		maculata				Brischke, 1865	<p style="margin-left: 40px;"><i>affinis</i> Brischke, 1865</p>							England		Brock (in prep.) states that Irish records require confirmation.
300154	Animalia		Arthropoda			Insecta			Hymenoptera			Ichneumonoidea	Ichneumonidae	BANCHINAE	ATROPHINI		Lissonota		magdalenae				Pfankuch, 1921	<p style="margin-left: 40px;"><i>vernalis</i> Roman, 1925</p>							England, Scotland, Ireland		added by Stelfox (1932); recorded originally from Ireland by and therefore not listed in Fitton (1978), then from Scotland by Ashmole et al. (1983).
300155	Animalia		Arthropoda			Insecta			Hymenoptera			Ichneumonoidea	Ichneumonidae	BANCHINAE	ATROPHINI		Lissonota		mutator				Aubert, 1969								England		distribution data from Shaw (1999a)
300156	Animalia		Arthropoda			Insecta			Hymenoptera			Ichneumonoidea	Ichneumonidae	BANCHINAE	ATROPHINI		Lissonota		nigridens				Thomson, 1889								England, Scotland, Ireland
300157	Animalia		Arthropoda			Insecta			Hymenoptera			Ichneumonoidea	Ichneumonidae	BANCHINAE	ATROPHINI		Lissonota		nitida				Gravenhorst, 1829	<p style="margin-left: 40px;"><i>agnata</i> Gravenhorst, 1829</p><p style="margin-left: 40px;"><i>rhenana</i> Ulbricht, 1916</p><p style="margin-left: 40px;"><i>lissonotoides</i> (Habermehl, 1917, <i>Meniscus</i>)</p>							England
300158	Animalia		Arthropoda			Insecta			Hymenoptera			Ichneumonoidea	Ichneumonidae	BANCHINAE	ATROPHINI		Lissonota		obsoleta				Bridgman, 1889								England
300159	Animalia		Arthropoda			Insecta			Hymenoptera			Ichneumonoidea	Ichneumonidae	BANCHINAE	ATROPHINI		Lissonota		palpalis				Thomson, 1889	<p style="margin-left: 40px;"><i>oudemansi</i> Smits</p><p style="margin-left: 40px;"><i>exareolata</i> (Habermehl, 1923, <i>Meniscus</i>)</p><p style="margin-left: 40px;"><i>inareolata</i> (Kiss, 1824, <i>Meniscus</i>)</p>							England, Ireland
300160	Animalia		Arthropoda			Insecta			Hymenoptera			Ichneumonoidea	Ichneumonidae	BANCHINAE	ATROPHINI		Lissonota		palpator				Aubert, 1969	<p style="margin-left: 40px;"><i>parasitellae</i> Horstmann, 2003</p><p style="margin-left: 40px;"><i>errabunda</i> misident.</p>							England, Scotland		added by Horstmann (2003a)
300161	Animalia		Arthropoda			Insecta			Hymenoptera			Ichneumonoidea	Ichneumonidae	BANCHINAE	ATROPHINI		Lissonota		picticoxis				Schmiedeknecht, 1900								England, Scotland		added by Brock (in prep.)
300162	Animalia		Arthropoda			Insecta			Hymenoptera			Ichneumonoidea	Ichneumonidae	BANCHINAE	ATROPHINI		Lissonota		pimplator				(Zetterstedt, 1838)	<p style="margin-left: 40px;"><i>Tryphon pimplator</i> Zetterstedt, 1838</p>							Scotland		added by Aubert (1978); Morley’s (1908) pimplator refers to canaliculata Brock (in prep.).
300163	Animalia		Arthropoda			Insecta			Hymenoptera			Ichneumonoidea	Ichneumonidae	BANCHINAE	ATROPHINI		Lissonota		pleuralis				Brischke, 1880	<p style="margin-left: 40px;"><i>strigifrons</i> Schmiedeknecht, 1900</p>							England		added by Aubert (1978)
300164	Animalia		Arthropoda			Insecta			Hymenoptera			Ichneumonoidea	Ichneumonidae	BANCHINAE	ATROPHINI		Lissonota		proxima				Fonscolombe, 1854	<p style="margin-left: 40px;"><i>varipes</i> (Desvignes, 1856, <i>Lampronota</i>)</p><p style="margin-left: 40px;"><i>commixta</i> Holmgren, 1860</p><p style="margin-left: 40px;"><i>lapponica</i> Holmgren, 1860</p><p style="margin-left: 40px;"><i>opacula</i> Szépligeti, 1899</p><p style="margin-left: 40px;"><i>variipes</i> Dalla Torre, 1901</p>							England, Ireland
300165	Animalia		Arthropoda			Insecta			Hymenoptera			Ichneumonoidea	Ichneumonidae	BANCHINAE	ATROPHINI		Lissonota		punctiventrator				Aubert, 1977	<p style="margin-left: 40px;"><i>punctiventris</i> misident.</p>							England, Scotland, Wales		added by Aubert (1978)
300166	Animalia		Arthropoda			Insecta			Hymenoptera			Ichneumonoidea	Ichneumonidae	BANCHINAE	ATROPHINI		Lissonota		punctiventris				Thomson, 1877	<p style="margin-left: 40px;"><i>?errabunda</i> Holmgren</p>							England, Scotland		added by Brock (in prep.)
300167	Animalia		Arthropoda			Insecta			Hymenoptera			Ichneumonoidea	Ichneumonidae	BANCHINAE	ATROPHINI		Lissonota		quadrinotata				Gravenhorst, 1829	<p style="margin-left: 40px;"><i>leucogona</i> Gravenhorst, 1829</p><p style="margin-left: 40px;"><i>carinifrons</i> Thomson, 1877</p>							England, Wales
300168	Animalia		Arthropoda			Insecta			Hymenoptera			Ichneumonoidea	Ichneumonidae	BANCHINAE	ATROPHINI		Lissonota		saturator				(Thunberg, 1824)	<p style="margin-left: 40px;"><i>Ichneumon saturator</i> Thunberg, 1824</p><p style="margin-left: 40px;"><i>pubescens</i> (Zetterstedt, 1838, <i>Bassus</i>)</p><p style="margin-left: 40px;"><i>vicina</i> Holmgren, 1860</p><p style="margin-left: 40px;"><i>basalis</i> Thomson, 1889</p><p style="margin-left: 40px;"><i>mutanda</i> Schmiedeknecht, 1900</p>							England, Scotland, Wales		Brock (in prep.) states that Irish records require confirmation.
300169	Animalia		Arthropoda			Insecta			Hymenoptera			Ichneumonoidea	Ichneumonidae	BANCHINAE	ATROPHINI		Lissonota		semirufa				(Desvignes, 1856)	<p style="margin-left: 40px;"><i>Lampronota semirufa</i> Desvignes, 1856</p>							England, Scotland		some distribution data from Horstmann (2004c)
300170	Animalia		Arthropoda			Insecta			Hymenoptera			Ichneumonoidea	Ichneumonidae	BANCHINAE	ATROPHINI		Lissonota		setosa				(Geoffroy, 1785)	<p style="margin-left: 40px;"><i>Ichneumon setosus</i> Geoffroy, 1785</p><p style="margin-left: 40px;"><i>enervator</i> (Fabricius, 1793, <i>Ichneumon</i>)</p><p style="margin-left: 40px;"><i>cryptator</i> (Thunberg, 1824, <i>Ichneumon</i>)</p><p style="margin-left: 40px;"><i>renovator</i> (Thunberg, 1824, <i>Ichneumon</i>)</p><p style="margin-left: 40px;"><i>nigra</i> (Szépligeti, 1914, <i>Odino…							England
300171	Animalia		Arthropoda			Insecta			Hymenoptera			Ichneumonoidea	Ichneumonidae	BANCHINAE	ATROPHINI		Lissonota		silvatica				Habermehl, 1918	<p style="margin-left: 40px;"><i>palpator</i> Aubert, 1969</p>							England		added by Aubert (1978)
300172	Animalia		Arthropoda			Insecta			Hymenoptera			Ichneumonoidea	Ichneumonidae	BANCHINAE	ATROPHINI		Lissonota		stigmator				Aubert, 1972								England, Scotland
300173	Animalia		Arthropoda			Insecta			Hymenoptera			Ichneumonoidea	Ichneumonidae	BANCHINAE	ATROPHINI		Lissonota		subaciculata				Bridgman, 1886	<p style="margin-left: 40px;"><i>nitida</i> Bridgman, 1886</p>							England		Brock (in prep.) states that Irish records require confirmation.
300174	Animalia		Arthropoda			Insecta			Hymenoptera			Ichneumonoidea	Ichneumonidae	BANCHINAE	ATROPHINI		Lissonota		tenerrima				Thomson, 1877	<p style="margin-left: 40px;"><i>variabilis</i> Holmgren, 1860</p><p style="margin-left: 40px;"><i>fracta</i> Taschenberg, 1863</p><p style="margin-left: 40px;"><i>rufomedia</i> Bridgman, 1886</p><p style="margin-left: 40px;"><i>trochanterata</i> Bridgman, 1889</p><p style="margin-left: 40px;"><i>trochanteralis</i> Dalla Torre, 1901</p><p style="margin-left: 40px;"><i>procera</i> Pfeffer, 1913</p…							England, Scotland, Ireland
300175	Animalia		Arthropoda			Insecta			Hymenoptera			Ichneumonoidea	Ichneumonidae	BANCHINAE	ATROPHINI		Lissonota		trochanterator				Aubert, 1972								England
300176	Animalia		Arthropoda			Insecta			Hymenoptera			Ichneumonoidea	Ichneumonidae	BANCHINAE	ATROPHINI		Lissonota		versicolor				Holmgren, 1860	<p style="margin-left: 40px;"><i>formosa</i> Bridgman, 1888</p><p style="margin-left: 40px;"><i>coxata</i> Smits</p><p style="margin-left: 40px;"><i>rufithorax</i> Habermehl, 1918</p>							England, Ireland
300177	Animalia		Arthropoda			Insecta			Hymenoptera			Ichneumonoidea	Ichneumonidae	BANCHINAE	ATROPHINI		Lissonota		sp.				A								England		added by Brock (in prep.)
300178	Animalia		Arthropoda			Insecta			Hymenoptera			Ichneumonoidea	Ichneumonidae	BANCHINAE	ATROPHINI		Lissonota		sp.				C								England		added by Brock (in prep.)
300179	Animalia		Arthropoda			Insecta			Hymenoptera			Ichneumonoidea	Ichneumonidae	BANCHINAE	ATROPHINI		Lissonota		sp.				D								England, Scotland, Wales		added by Brock (in prep.)
300180	Animalia		Arthropoda			Insecta			Hymenoptera			Ichneumonoidea	Ichneumonidae	BANCHINAE	ATROPHINI		Lissonota		sp.				P								Scotland		added by Brock (in prep.)
300181	Animalia		Arthropoda			Insecta			Hymenoptera			Ichneumonoidea	Ichneumonidae	BANCHINAE	ATROPHINI		Lissonota		sp.				S								England		added by Brock (in prep.); impressor misident.
300182	Animalia		Arthropoda			Insecta			Hymenoptera			Ichneumonoidea	Ichneumonidae	BANCHINAE	ATROPHINI		Lissonota		sp.				SI								England		added by Brock (in prep.)
300183	Animalia		Arthropoda			Insecta			Hymenoptera			Ichneumonoidea	Ichneumonidae	BANCHINAE	ATROPHINI		Lissonota		sp.				V	<p style="margin-left: 40px;"><i>basalis</i> Brischke, 1865]</p>							England		added by Brock (in prep.)
300184	Animalia		Arthropoda			Insecta			Hymenoptera			Ichneumonoidea	Ichneumonidae	BANCHINAE	ATROPHINI		Syzeuctus						Förster, 1869	<p style="margin-left: 40px;"><i>DICERATOPS</i> Förster, 1869</p><p style="margin-left: 40px;"><i>SYZEUCTA</i> Thomson, 1889</p>									Species of Syzeuctus excluded from the British and Irish list: [irrisorius (Rossius, 1794, Ichneumon)] Brock (in prep.) found no British specimens of irrisorius.
300185	Animalia		Arthropoda			Insecta			Hymenoptera			Ichneumonoidea	Ichneumonidae	BANCHINAE	ATROPHINI		Syzeuctus		bicornis				(Gravenhorst, 1829)	<p style="margin-left: 40px;"><i>Lissonta bicornis</i> Gravenhorst, 1829</p>							England
300186	Animalia		Arthropoda			Insecta			Hymenoptera			Ichneumonoidea	Ichneumonidae	BANCHINAE	ATROPHINI		Syzeuctus		fuscator				(Panzer, 1809)	<p style="margin-left: 40px;"><i>Ophion fuscator</i> Panzer, 1809</p><p style="margin-left: 40px;"><i>maculatorius</i> (Fabricius, 1787, <i>Ichneumon</i>)</p><p style="margin-left: 40px;"><i>bicolor</i> Szépligeti, 1899</p><p style="margin-left: 40px;"><i>rufipes</i> Kiss, 1933</p>							England, Wales
300187	Animalia		Arthropoda			Insecta			Hymenoptera			Ichneumonoidea	Ichneumonidae	BANCHINAE	BANCHINI								Wesmael, 1845
300188	Animalia		Arthropoda			Insecta			Hymenoptera			Ichneumonoidea	Ichneumonidae	BANCHINAE	BANCHINI		Banchus						Fabricius, 1798										Distribution data from Fitton (1985) and the NMS.
300189	Animalia		Arthropoda			Insecta			Hymenoptera			Ichneumonoidea	Ichneumonidae	BANCHINAE	BANCHINI		Banchus		crefeldensis				Ulbricht, 1916	<p style="margin-left: 40px;"><i>croaticus</i> Hensch, 1928</p>							Scotland, Ireland
300190	Animalia		Arthropoda			Insecta			Hymenoptera			Ichneumonoidea	Ichneumonidae	BANCHINAE	BANCHINI		Banchus		dilatatorius				(Thunberg, 1824)	<p style="margin-left: 40px;"><i>Ichneumon dilatatorius</i> Thunberg, 1824</p><p style="margin-left: 40px;"><i>variegator</i> misident.</p><p style="margin-left: 40px;"><i>acuminator</i> (Fabricius, 1787, <i>Ichneumon</i>)</p><p style="margin-left: 40px;"><i>compressus</i> (Fabricius, 1787, <i>Ichneumon</i>)</p><p style="margin-left: 40px;"><i>sibiricus</i> Meyer, 1927</p>							England, Scotland
300191	Animalia		Arthropoda			Insecta			Hymenoptera			Ichneumonoidea	Ichneumonidae	BANCHINAE	BANCHINI		Banchus		falcatorius				(Fabricius, 1775)	<p style="margin-left: 40px;"><i>Ichneumon falcatorius</i> Fabricius, 1775</p><p style="margin-left: 40px;"><i>variegator</i> (Fabricius, 1775, <i>Ichneumon</i>)</p><p style="margin-left: 40px;"><i>tricolor</i> (Schrank, 1776, <i>Ichneumon</i>)</p><p style="margin-left: 40px;"><i>intersectus</i> (Geoffroy, 1785, <i>Ichneumon</i>)</p><p style="margin-left: 40px;"><i>aries</i> (Christ, 1791, <i>Ich…							England
300192	Animalia		Arthropoda			Insecta			Hymenoptera			Ichneumonoidea	Ichneumonidae	BANCHINAE	BANCHINI		Banchus		hastator				(Fabricius, 1793)	<p style="margin-left: 40px;"><i>Ichneumon hastator</i> Fabricius, 1793</p><p style="margin-left: 40px;"><i>pungitor</i> (Thunberg, 1824, <i>Ichneumon</i>)</p><p style="margin-left: 40px;"><i>reticulator</i> (Thunberg, 1824, <i>Ichneumon</i>)</p><p style="margin-left: 40px;"><i>femoralis</i> Thomson, 1897</p><p style="margin-left: 40px;"><i>kolosovi</i> Meyer, 1925</p>							England, Scotland, Ireland
300193	Animalia		Arthropoda			Insecta			Hymenoptera			Ichneumonoidea	Ichneumonidae	BANCHINAE	BANCHINI		Banchus		moppiti				Fitton, 1985										added by Fitton (1985); known in Britain only from an unlabelled specimen from Desvignes’s collection.
300194	Animalia		Arthropoda			Insecta			Hymenoptera			Ichneumonoidea	Ichneumonidae	BANCHINAE	BANCHINI		Banchus		palpalis				Ruthe, 1859	<p style="margin-left: 40px;"><i>monileatus</i> misident.</p><p style="margin-left: 40px;"><i>groenlandicus</i> Aurivilius, 1890</p>							England, Scotland, Ireland		added by Fitton (1985)
300195	Animalia		Arthropoda			Insecta			Hymenoptera			Ichneumonoidea	Ichneumonidae	BANCHINAE	BANCHINI		Banchus		pictus				Fabricius, 1798	<p style="margin-left: 40px;"><i>cultratus</i> (Gmelin, 1790, <i>Ichneumon</i>)</p><p style="margin-left: 40px;"><i>mutillatus</i> (Christ, 1791, <i>Ichneumon</i>)</p><p style="margin-left: 40px;"><i>bipunctatus</i> Hensch, 1928</p><p style="margin-left: 40px;"><i>zagoriensis</i> Hensch, 1928</p>							England, Wales
300196	Animalia		Arthropoda			Insecta			Hymenoptera			Ichneumonoidea	Ichneumonidae	BANCHINAE	BANCHINI		Banchus		volutatorius				(Linnaeus, 1758)	<p style="margin-left: 40px;"><i>Ichneumon volutatorius</i> Linnaeus, 1758</p><p style="margin-left: 40px;"><i>venator</i> (Linnaeus, 1758, <i>Ichneumon</i>)</p><p style="margin-left: 40px;"><i>umbellatarum</i> (Schrank, 1786, <i>Ichneumon</i>)</p><p style="margin-left: 40px;"><i>certator</i> (Thunberg, 1824, <i>Ichneumon</i>)</p><p style="margin-left: 40px;"><i>monileatus</i> Gravenhorst, 1829</…							England, Scotland, Wales, Ireland
300197	Animalia		Arthropoda			Insecta			Hymenoptera			Ichneumonoidea	Ichneumonidae	BANCHINAE	BANCHINI		Exetastes						Gravenhorst, 1829	<p style="margin-left: 40px;"><i>LEPTOBATUS</i> Gravenhorst, 1829</p><p style="margin-left: 40px;"><i>RHIMPHALEA</i> Förster, 1869</p><p style="margin-left: 40px;"><i>SEMNOPHRYS</i> Förster, 1869</p><p style="margin-left: 40px;"><i>ALLEXETASTES</i> Kokujev, 1904</p>
300198	Animalia		Arthropoda			Insecta			Hymenoptera			Ichneumonoidea	Ichneumonidae	BANCHINAE	BANCHINI		Exetastes		adpressorius				(Thunberg, 1824)	<p style="margin-left: 40px;"><i>Ichneumon adpressorius</i> Thunberg, 1824</p><p style="margin-left: 40px;"><i>guttatorius</i> Gravenhorst, 1829</p><p style="margin-left: 40px;"><i>tristis</i> Gravenhorst, 1829</p><p style="margin-left: 40px;"><i>procera</i> Kriechbaumer, 1894</p><p style="margin-left: 40px;"><i>guttifer</i> Thomson, 1897</p><p style="margin-left: 40px;"><i>medianus</i> Szépliget…							England, Scotland, Ireland
300199	Animalia		Arthropoda			Insecta			Hymenoptera			Ichneumonoidea	Ichneumonidae	BANCHINAE	BANCHINI		Exetastes		atrator				(Forster, 1771)	<p style="margin-left: 40px;"><i>Ichneumon atrator</i> Forster, 1771</p><p style="margin-left: 40px;"><i>cinctipes</i> (Retzius, 1783, <i>Ichneumon</i>)</p><p style="margin-left: 40px;"><i>junci</i> (Geoffroy, 1785, <i>Ichneumon</i>)</p><p style="margin-left: 40px;"><i>osculatorius</i> (Fabricius, 1787, <i>Ichneumon</i>)</p><p style="margin-left: 40px;"><i>obscurator</i> (Gmelin, 1790, <i>Ichneum…							England, Scotland, Ireland
300200	Animalia		Arthropoda			Insecta			Hymenoptera			Ichneumonoidea	Ichneumonidae	BANCHINAE	BANCHINI		Exetastes		calobatus				Gravenhorst, 1829	<p style="margin-left: 40px;"><i>calobates</i> Dalla Torre, 1901</p>							England
300201	Animalia		Arthropoda			Insecta			Hymenoptera			Ichneumonoidea	Ichneumonidae	BANCHINAE	BANCHINI		Exetastes		femorator				Desvignes, 1856								England		Brock (in prep.) states that Irish records require confirmation.
300202	Animalia		Arthropoda			Insecta			Hymenoptera			Ichneumonoidea	Ichneumonidae	BANCHINAE	BANCHINI		Exetastes		fornicator				(Fabricius, 1781)	<p style="margin-left: 40px;"><i>Ichneumon fornicator</i> Fabricius, 1781</p><p style="margin-left: 40px;"><i>exapansor</i> (Thunberg, 1824, <i>Ichneumon</i>)</p><p style="margin-left: 40px;"><i>punctulatus</i> Kokujev, 1905</p>							England, Ireland
300203	Animalia		Arthropoda			Insecta			Hymenoptera			Ichneumonoidea	Ichneumonidae	BANCHINAE	BANCHINI		Exetastes		illusor				Gravenhorst, 1829	<p style="margin-left: 40px;"><i>minor</i> Szépligeti, 1901</p><p style="margin-left: 40px;"><i>annulatus</i> Habermehl, 1927</p><p style="margin-left: 40px;"><i>?geniculosus</i> Holmgren, 1860</p>							England, Scotland, Ireland, Isle of Man
300204	Animalia		Arthropoda			Insecta			Hymenoptera			Ichneumonoidea	Ichneumonidae	BANCHINAE	BANCHINI		Exetastes		illyricus				Strobl, 1904								England		added by Brock (in prep.)
300205	Animalia		Arthropoda			Insecta			Hymenoptera			Ichneumonoidea	Ichneumonidae	BANCHINAE	BANCHINI		Exetastes		laevigator				(Villers, 1789)	<p style="margin-left: 40px;"><i>Ichneumon laevigator</i> Villers, 1789</p><p style="margin-left: 40px;"><i>cothurnatus</i> (Gravenhorst, 1807, <i>Ichneumon</i>)</p><p style="margin-left: 40px;"><i>incurvator</i> (Thunberg, 1824, <i>Ichneumon</i>)</p><p style="margin-left: 40px;"><i>alpinus</i> Kriechbaumer, 1888</p><p style="margin-left: 40px;"><i>puberulus</i> (Szépligeti, 1898, <i></i>)</p><p …							England
300206	Animalia		Arthropoda			Insecta			Hymenoptera			Ichneumonoidea	Ichneumonidae	BANCHINAE	BANCHINI		Exetastes		maurus				Desvignes, 1856	<p style="margin-left: 40px;"><i>facialis</i> Desvignes, 1856</p><p style="margin-left: 40px;"><i>benoisti</i> Seyrig, 1926</p><p style="margin-left: 40px;"><i>melanopus</i> Meyer, 1927</p><p style="margin-left: 40px;"><i>croaticus</i> Hensch, 1928</p>							England
300207	Animalia		Arthropoda			Insecta			Hymenoptera			Ichneumonoidea	Ichneumonidae	BANCHINAE	BANCHINI		Exetastes		nigripes				Gravenhorst, 1829								England, Scotland, Wales		Brock (in prep.) states that Irish records require confirmation.
300208	Animalia		Arthropoda			Insecta			Hymenoptera			Ichneumonoidea	Ichneumonidae	BANCHINAE	BANCHINI		Exetastes		tibialis				Pfankuch, 1921								England		added by Brock (in prep.)
300209	Animalia		Arthropoda			Insecta			Hymenoptera			Ichneumonoidea	Ichneumonidae	BANCHINAE	BANCHINI		Rynchobanchus						Kriechbaumer, 1894
300210	Animalia		Arthropoda			Insecta			Hymenoptera			Ichneumonoidea	Ichneumonidae	BANCHINAE	BANCHINI		Rynchobanchus		flavopictus				Heinrich, 1937								England		added by Fitton (1987)
300211	Animalia		Arthropoda			Insecta			Hymenoptera			Ichneumonoidea	Ichneumonidae	BANCHINAE	GLYPTINI								Cushman &amp; Rohwer, 1920
300212	Animalia		Arthropoda			Insecta			Hymenoptera			Ichneumonoidea	Ichneumonidae	BANCHINAE	GLYPTINI		Apophua						Morley, 1913
300213	Animalia		Arthropoda			Insecta			Hymenoptera			Ichneumonoidea	Ichneumonidae	BANCHINAE	GLYPTINI		Apophua		bipunctoria				(Thunberg, 1824)	<p style="margin-left: 40px;"><i>Ichneumon bipunctorius</i> Thunberg, 1824</p><p style="margin-left: 40px;"><i>cubitoria</i> (Thunberg, 1824, <i>Ichneumon</i>)</p><p style="margin-left: 40px;"><i>flavolineata</i> (Gravenhorst, 1829, <i>Glypta</i>)</p><p style="margin-left: 40px;"><i>baltica</i> (Habermehl, 1926, <i>Glypta</i>)</p>							England, Scotland, Wales, Ireland, Isle of Man
300214	Animalia		Arthropoda			Insecta			Hymenoptera			Ichneumonoidea	Ichneumonidae	BANCHINAE	GLYPTINI		Apophua		cicatricosa				(Ratzeburg, 1848)	<p style="margin-left: 40px;"><i>Glypta cicatricosa</i> Ratzeburg, 1848</p><p style="margin-left: 40px;"><i>crenulata</i> (Thomson, 1889, <i>Glypta</i>)</p>
300215	Animalia		Arthropoda			Insecta			Hymenoptera			Ichneumonoidea	Ichneumonidae	BANCHINAE	GLYPTINI		Apophua		evanescens				(Ratzeburg, 1848)	<p style="margin-left: 40px;"><i>Glypta evanescens</i> Ratzeburg, 1848</p><p style="margin-left: 40px;"><i>albifrons</i> (Holmgren, 1856, <i>Glypta</i>)</p>							England, Scotland, Ireland
300216	Animalia		Arthropoda			Insecta			Hymenoptera			Ichneumonoidea	Ichneumonidae	BANCHINAE	GLYPTINI		Apophua		genalis				(Möller, 1883)	<p style="margin-left: 40px;"><i>Glypta genalis</i> Möller, 1883</p><p style="margin-left: 40px;"><i>superba</i> (Hellén, 1915, <i>Glypta</i>)</p>							Ireland
300217	Animalia		Arthropoda			Insecta			Hymenoptera			Ichneumonoidea	Ichneumonidae	BANCHINAE	GLYPTINI		Diblastomorpha						Förster, 1869										Reinstated as a valid genus, from synonymy under Glypta, by Watanabe &amp; Maeto (2013).
300218	Animalia		Arthropoda			Insecta			Hymenoptera			Ichneumonoidea	Ichneumonidae	BANCHINAE	GLYPTINI		Diblastomorpha		cylindrator				(Fabricius, 1787)	<p style="margin-left: 40px;"><i>Ichneumon cylindrator</i> Fabricius, 1787</p><p style="margin-left: 40px;"><i>erythrogaster</i> Lucas, 1849</p><p style="margin-left: 40px;"><i>bicornis</i> Boie, 1850</p><p style="margin-left: 40px;"><i>bicornis</i> Desvignes, 1856</p><p style="margin-left: 40px;"><i>corniculata</i> Brischke, 1865</p><p style="margin-left: 40px;"><i>elegans</i> Vollenhoven, 1873<…							England, Scotland, Wales, Ireland
300219	Animalia		Arthropoda			Insecta			Hymenoptera			Ichneumonoidea	Ichneumonidae	BANCHINAE	GLYPTINI		Diblastomorpha		rostrata				Holmgren, 1860								England, Ireland, Isle of Man		Treated as a valid species, rather than a synonym of cylindrator, by Brock (in prep.).
300220	Animalia		Arthropoda			Insecta			Hymenoptera			Ichneumonoidea	Ichneumonidae	BANCHINAE	GLYPTINI		Glypta						Gravenhorst, 1829	<p style="margin-left: 40px;"><i>CONOBLASTA</i> Förster, 1869</p><p style="margin-left: 40px;"><i>FOVEOGLYPTA</i> Hellén, 1915</p>									Species of Glypta excluded from the British and Irish list: [schneideri Krieger, 1897] Recorded from Ireland by Johnson (1921) (and not listed by Fitton, 1978, as not known from Britain), but J.P. Brock has seen no authentic British or Irish material. [scalaris Gravenhorst, 1829] Misidentified scalaris are described by Brock (in prep.) as Glypa sp. PU. [teres Gravenhorst, 1829] British specimens …
300221	Animalia		Arthropoda			Insecta			Hymenoptera			Ichneumonoidea	Ichneumonidae	BANCHINAE	GLYPTINI		Glypta		bifoveolata				Gravenhorst, 1829	<p style="margin-left: 40px;"><i>setosa</i> Roman, 1909</p>							England, Scotland, Wales, Ireland
300222	Animalia		Arthropoda			Insecta			Hymenoptera			Ichneumonoidea	Ichneumonidae	BANCHINAE	GLYPTINI		Glypta		ceratites				Gravenhorst, 1829								England, Scotland, Ireland, Isle of Man
300223	Animalia		Arthropoda			Insecta			Hymenoptera			Ichneumonoidea	Ichneumonidae	BANCHINAE	GLYPTINI		Glypta		consimilis				Holmgren, 1860	<p style="margin-left: 40px;"><i>brevicornis</i> Rudow, 1883</p><p style="margin-left: 40px;"><i>parvicornuta</i> Bridgman, 1886</p><p style="margin-left: 40px;"><i>xanthognatha</i> Thomson, 1889</p><p style="margin-left: 40px;"><i>berolinae</i> (Strand, 1918, <i>Conoblasta</i>)</p>							England, Scotland, Ireland
300224	Animalia		Arthropoda			Insecta			Hymenoptera			Ichneumonoidea	Ichneumonidae	BANCHINAE	GLYPTINI		Glypta		elongata				Holmgren, 1860								England, Scotland, Wales, Ireland
300225	Animalia		Arthropoda			Insecta			Hymenoptera			Ichneumonoidea	Ichneumonidae	BANCHINAE	GLYPTINI		Glypta		extincta				Ratzeburg, 1852	<p style="margin-left: 40px;"><i>nigriventris</i> Thomson, 1889</p>							England, Scotland
300226	Animalia		Arthropoda			Insecta			Hymenoptera			Ichneumonoidea	Ichneumonidae	BANCHINAE	GLYPTINI		Glypta		femorator				Desvignes, 1856	<p style="margin-left: 40px;"><i>filicornis</i> Thomson, 1889</p><p style="margin-left: 40px;"><i>femoratrix</i> Schulz, 1906</p><p style="margin-left: 40px;"><i>elegantula</i> Hellén, 1915</p><p style="margin-left: 40px;"><i>obscurata</i> Kiss, 1929</p><p style="margin-left: 40px;"><i>pellucida</i> Schmiedeknecht, 1935</p><p style="margin-left: 40px;"><i>triangularis</i> Schmiedeknecht, 1935</p>…							England, Scotland, Ireland
300227	Animalia		Arthropoda			Insecta			Hymenoptera			Ichneumonoidea	Ichneumonidae	BANCHINAE	GLYPTINI		Glypta		fronticornis				Gravenhorst, 1829	<p style="margin-left: 40px;"><i>dispar</i> Schiødte, 1839</p>							England, Scotland, Ireland
300228	Animalia		Arthropoda			Insecta			Hymenoptera			Ichneumonoidea	Ichneumonidae	BANCHINAE	GLYPTINI		Glypta		haesitator				Gravenhorst, 1829	<p style="margin-left: 40px;"><i>haesitatrix</i> Schulz, 1906</p><p style="margin-left: 40px;"><i>australis</i> (Hedwig, 1959, <i>Lycorina</i>)</p>							England, Scotland, Ireland
300229	Animalia		Arthropoda			Insecta			Hymenoptera			Ichneumonoidea	Ichneumonidae	BANCHINAE	GLYPTINI		Glypta		incisa				Gravenhorst, 1829								England, Wales
300230	Animalia		Arthropoda			Insecta			Hymenoptera			Ichneumonoidea	Ichneumonidae	BANCHINAE	GLYPTINI		Glypta		lapponica				Holmgren, 1860	<p style="margin-left: 40px;"><i>annulata</i> Bridgman, 1890</p><p style="margin-left: 40px;"><i>areolaris</i> Hellén, 1915</p><p style="margin-left: 40px;"><i>nigricoxa</i> (Kokujev, 1927, <i>Conoblasta</i>)</p><p style="margin-left: 40px;"><i>alpina</i> (Heinrich, 1949, <i>Conoblasta</i>)</p>							England, Scotland, Ireland
300231	Animalia		Arthropoda			Insecta			Hymenoptera			Ichneumonoidea	Ichneumonidae	BANCHINAE	GLYPTINI		Glypta		lineata				Desvignes, 1856								England
300232	Animalia		Arthropoda			Insecta			Hymenoptera			Ichneumonoidea	Ichneumonidae	BANCHINAE	GLYPTINI		Glypta		longicauda				Hartig, 1838	<p style="margin-left: 40px;"><i>nigrotrochanterata</i> Strobl, 1902</p>							Ireland
300233	Animalia		Arthropoda			Insecta			Hymenoptera			Ichneumonoidea	Ichneumonidae	BANCHINAE	GLYPTINI		Glypta		longispinis				(Gmelin, 1790)	<p style="margin-left: 40px;"><i>Ichneumon longispinis</i> Gmelin, 1790</p><p style="margin-left: 40px;"><i>provincialis</i> Fonscolombe, 1854</p><p style="margin-left: 40px;"><i>rubicunda</i> Bridgman, 1890</p><p style="margin-left: 40px;"><i>algerica</i> Habemehl, 1917</p><p style="margin-left: 40px;"><i>zangezurica</i> Kuslitzky, 1974</p>							England
300234	Animalia		Arthropoda			Insecta			Hymenoptera			Ichneumonoidea	Ichneumonidae	BANCHINAE	GLYPTINI		Glypta		mensurator				(Fabricius, 1775)	<p style="margin-left: 40px;"><i>Ichneumon mensurator</i> Fabricius, 1775</p><p style="margin-left: 40px;"><i>lugubrina</i> Holmgren, 1860</p><p style="margin-left: 40px;"><i>macropyga</i> Hellén, 1915</p><p style="margin-left: 40px;"><i>heydeni</i> Habemehl, 1917</p><p style="margin-left: 40px;"><i>jaroslavensis</i> Shestakov, 1927</p>							England, Scotland, Wales, Ireland
300235	Animalia		Arthropoda			Insecta			Hymenoptera			Ichneumonoidea	Ichneumonidae	BANCHINAE	GLYPTINI		Glypta		microcera				Thomson, 1899	<p style="margin-left: 40px;"><i>segrex</i> Kokujev, 1913</p>							England		added by Aubert (1978)
300236	Animalia		Arthropoda			Insecta			Hymenoptera			Ichneumonoidea	Ichneumonidae	BANCHINAE	GLYPTINI		Glypta		monoceros				Gravenhorst, 1829								England, Scotland, Wales, Ireland
300237	Animalia		Arthropoda			Insecta			Hymenoptera			Ichneumonoidea	Ichneumonidae	BANCHINAE	GLYPTINI		Glypta		nigricornis				Thomson, 1899	<p style="margin-left: 40px;"><i>rufipes</i> Brischke, 1865</p><p style="margin-left: 40px;"><i>brischkei</i> Dalla Torre, 1901</p><p style="margin-left: 40px;"><i>papyri</i> Speiser, 1908</p>							England, Scotland, Ireland		added by Aubert (1978)
300238	Animalia		Arthropoda			Insecta			Hymenoptera			Ichneumonoidea	Ichneumonidae	BANCHINAE	GLYPTINI		Glypta		nigrina				Desvignes, 1856	<p style="margin-left: 40px;"><i>flavipes</i> Desvignes, 1856</p><p style="margin-left: 40px;"><i>ruficeps</i> Desvignes, 1856</p><p style="margin-left: 40px;"><i>fractigena</i> Thomson, 1889</p><p style="margin-left: 40px;"><i>obscura</i> Pfankuch, 1924</p><p style="margin-left: 40px;"><i>clypeodentata</i> Bauer, 1959</p><p style="margin-left: 40px;"><i>habermani</i> Ozols, 1959</p>							England, Scotland, Ireland
300239	Animalia		Arthropoda			Insecta			Hymenoptera			Ichneumonoidea	Ichneumonidae	BANCHINAE	GLYPTINI		Glypta		nigrotrochanterator				Strobl, 1902	<p style="margin-left: 40px;"><i>mensurator</i> misident.</p><p style="margin-left: 40px;"><i>longicauda</i> misident.</p>							England, Scotland, Ireland		added by Brock (in prep.)
300240	Animalia		Arthropoda			Insecta			Hymenoptera			Ichneumonoidea	Ichneumonidae	BANCHINAE	GLYPTINI		Glypta		parvicaudata				Bridgman, 1889								England, Scotland, Ireland
300241	Animalia		Arthropoda			Insecta			Hymenoptera			Ichneumonoidea	Ichneumonidae	BANCHINAE	GLYPTINI		Glypta		pedata				Desvignes, 1856								England
300242	Animalia		Arthropoda			Insecta			Hymenoptera			Ichneumonoidea	Ichneumonidae	BANCHINAE	GLYPTINI		Glypta		pictipes				Taschenberg, 1863								England, Scotland, Ireland		added by Aubert (1978)
300243	Animalia		Arthropoda			Insecta			Hymenoptera			Ichneumonoidea	Ichneumonidae	BANCHINAE	GLYPTINI		Glypta		punctifrons				Bridgman, 1890								Scotland		Synonymised under scalaris by Aubert (1978) but this synonymy rejected by Brock (in prep.). Known only from the male type specimen, punctifrons is essentially an unknown species within Glypta.
300244	Animalia		Arthropoda			Insecta			Hymenoptera			Ichneumonoidea	Ichneumonidae	BANCHINAE	GLYPTINI		Glypta		resinanae				Hartig, 1838	<p style="margin-left: 40px;"><i>arreptans</i> Hellén, 1915</p><p style="margin-left: 40px;"><i>summimontis</i> Heinrich, 1953</p>							England
300245	Animalia		Arthropoda			Insecta			Hymenoptera			Ichneumonoidea	Ichneumonidae	BANCHINAE	GLYPTINI		Glypta		rufata				Bridgman, 1887								England, Ireland
300246	Animalia		Arthropoda			Insecta			Hymenoptera			Ichneumonoidea	Ichneumonidae	BANCHINAE	GLYPTINI		Glypta		sculpturata				Gravenhorst, 1829	<p style="margin-left: 40px;"><i>macrura</i> Habermehl, 1918</p><p style="margin-left: 40px;"><i>rufoclypeata</i> Kiss, 1924</p>							England, Ireland
300247	Animalia		Arthropoda			Insecta			Hymenoptera			Ichneumonoidea	Ichneumonidae	BANCHINAE	GLYPTINI		Glypta		scutellaris				Thomson, 1899								England, Scotland		added by Brock (in prep.)
300248	Animalia		Arthropoda			Insecta			Hymenoptera			Ichneumonoidea	Ichneumonidae	BANCHINAE	GLYPTINI		Glypta		similis				Bridgman, 1886	<p style="margin-left: 40px;"><i>rufipes</i> Thomson, 1889</p><p style="margin-left: 40px;"><i>thomsonii</i> Dalla Torre, 1901</p><p style="margin-left: 40px;"><i>thomsoni</i> Strobl, 1902</p>							England, Ireland
300249	Animalia		Arthropoda			Insecta			Hymenoptera			Ichneumonoidea	Ichneumonidae	BANCHINAE	GLYPTINI		Glypta		tenuicornis				Thomson, 1889	<p style="margin-left: 40px;"><i>pygmaea</i> Shestakov, 1927</p>							England
300250	Animalia		Arthropoda			Insecta			Hymenoptera			Ichneumonoidea	Ichneumonidae	BANCHINAE	GLYPTINI		Glypta		trochanterata				Bridgman, 1886								England, Scotland, Ireland
300251	Animalia		Arthropoda			Insecta			Hymenoptera			Ichneumonoidea	Ichneumonidae	BANCHINAE	GLYPTINI		Glypta		ulbrichti				Habermehl, 1926								England		added by Brock (in prep.)
300252	Animalia		Arthropoda			Insecta			Hymenoptera			Ichneumonoidea	Ichneumonidae	BANCHINAE	GLYPTINI		Glypta		vulnerator				Gravenhorst, 1829	<p style="margin-left: 40px;"><i>vulneratrix</i> Schulz, 1906</p><p style="margin-left: 40px;"><i>monstrosa</i> Hellén, 1915</p>							England, Scotland, Ireland
300253	Animalia		Arthropoda			Insecta			Hymenoptera			Ichneumonoidea	Ichneumonidae	BANCHINAE	GLYPTINI		Glypta		woerzi				(Hedwig, 1952)	<p style="margin-left: 40px;"><i>Conoblasta woerzi</i> Hedwig, 1952</p>							England		added by Brock (in prep.)
300254	Animalia		Arthropoda			Insecta			Hymenoptera			Ichneumonoidea	Ichneumonidae	BANCHINAE	GLYPTINI		Glypta		sp.				PA								England		added by Brock (in prep.)
300255	Animalia		Arthropoda			Insecta			Hymenoptera			Ichneumonoidea	Ichneumonidae	BANCHINAE	GLYPTINI		Glypta		sp.				PU	<p style="margin-left: 40px;"><i>scalaris</i> misident.</p>							Ireland		added by Brock (in prep.)
300256	Animalia		Arthropoda			Insecta			Hymenoptera			Ichneumonoidea	Ichneumonidae	BANCHINAE	GLYPTINI		Teleutaea						Förster, 1869	<p style="margin-left: 40px;"><i>HOPLITOPHRYS</i> Förster, 1869</p><p style="margin-left: 40px;"><i>TELEUTEA</i> Thomson, 1889</p>
300257	Animalia		Arthropoda			Insecta			Hymenoptera			Ichneumonoidea	Ichneumonidae	BANCHINAE	GLYPTINI		Teleutaea		brischkei				(Holmgren, 1860)	<p style="margin-left: 40px;"><i>Glypta brischkei</i> Holmgren, 1860</p>							England		added by Aubert (1978); NMS; Horniman
300258	Animalia		Arthropoda			Insecta			Hymenoptera			Ichneumonoidea	Ichneumonidae	CAMPOPLEGINAE									Förster, 1869										Many of the species new to the fauna have been identified by K. Horstmann from material in NMS and NHM. Additional references are given.
300259	Animalia		Arthropoda			Insecta			Hymenoptera			Ichneumonoidea	Ichneumonidae	CAMPOPLEGINAE			Alcima						Förster, 1869
300260	Animalia		Arthropoda			Insecta			Hymenoptera			Ichneumonoidea	Ichneumonidae	CAMPOPLEGINAE			Alcima		orbitale				(Gravenhorst, 1829)	<p style="margin-left: 40px;"><i>Campoplex orbitalis</i> Gravenhorst, 1829</p><p style="margin-left: 40px;"><i>alboscutellare</i> (Thomson, 1887, <i>Casinaria</i>)</p><p style="margin-left: 40px;"><i>carinata</i> (Kriechbaumer, 1898, <i>Casinaria</i>)</p>							England, Wales		Listed as Casinaria orbitalis by Fitton (1978).
300261	Animalia		Arthropoda			Insecta			Hymenoptera			Ichneumonoidea	Ichneumonidae	CAMPOPLEGINAE			Bathyplectes						Förster, 1869	<p style="margin-left: 40px;"><i>CANIDIA</i> Holmgren, 1860</p><p style="margin-left: 40px;"><i>RHEXINEURA</i> Förster, 1869</p><p style="margin-left: 40px;"><i>BIOLYSIA</i> Schmiedeknecht, 1907</p><p style="margin-left: 40px;"><i>BATHYPIESTA</i> Aubert, 1979</p>
300262	Animalia		Arthropoda			Insecta			Hymenoptera			Ichneumonoidea	Ichneumonidae	CAMPOPLEGINAE			Bathyplectes		anurus				(Thomson, 1887)	<p style="margin-left: 40px;"><i>Canidia anura</i> Thomson, 1887</p>							England, Ireland
300263	Animalia		Arthropoda			Insecta			Hymenoptera			Ichneumonoidea	Ichneumonidae	CAMPOPLEGINAE			Bathyplectes		balteatus				(Thomson, 1887)	<p style="margin-left: 40px;"><i>Canidia balteata</i> Thomson, 1887</p><p style="margin-left: 40px;"><i>trisculptus</i> (Habermehl, 1926, <i>Canidia</i>)</p>							England		NMS, det. Horstmann, added here
300264	Animalia		Arthropoda			Insecta			Hymenoptera			Ichneumonoidea	Ichneumonidae	CAMPOPLEGINAE			Bathyplectes		curculionis				(Thomson, 1887)	<p style="margin-left: 40px;"><i>Canidia curculionis</i> Thomson, 1887</p><p style="margin-left: 40px;"><i>carthaginiensis</i> (Smits van Burgst, 1913, <i>Canidia</i>)</p>							England, Ireland		added by Horstmann (1974); omitted by Fitton (1978)
300265	Animalia		Arthropoda			Insecta			Hymenoptera			Ichneumonoidea	Ichneumonidae	CAMPOPLEGINAE			Bathyplectes		exiguus				(Gravenhorst, 1829)	<p style="margin-left: 40px;"><i>Campoplex exiguus</i> Gravenhorst, 1829</p><p style="margin-left: 40px;"><i>subcinctus</i> (Gravenhorst, 1829, <i>Campoplex</i>)</p>							England, Scotland, Ireland
300266	Animalia		Arthropoda			Insecta			Hymenoptera			Ichneumonoidea	Ichneumonidae	CAMPOPLEGINAE			Bathyplectes		immolator				(Gravenhorst, 1829)	<p style="margin-left: 40px;"><i>Campoplex immolator</i> Gravenhorst, 1829</p><p style="margin-left: 40px;"><i>marginellus</i> (Thomson, 1887, <i>Nepiesta</i>)</p>							Ireland
300267	Animalia		Arthropoda			Insecta			Hymenoptera			Ichneumonoidea	Ichneumonidae	CAMPOPLEGINAE			Bathyplectes		infernalis				(Gravenhorst, 1820)	<p style="margin-left: 40px;"><i>Ichneumon infernalis</i> Gravenhorst, 1820</p><p style="margin-left: 40px;"><i>infernalis</i> (Gravenhorst, 1829, <i>Mesoleptus</i>)</p><p style="margin-left: 40px;"><i>tristis</i> (Gravenhorst, 1829, <i>Campoplex</i>)</p><p style="margin-left: 40px;"><i>trochantellus</i> (Thomson, 1887, <i>Canidia</i>)</p>							England, Ireland
300268	Animalia		Arthropoda			Insecta			Hymenoptera			Ichneumonoidea	Ichneumonidae	CAMPOPLEGINAE			Bathyplectes		quinqueangularis				(Ratzeburg, 1852)	<p style="margin-left: 40px;"><i>Campoplex quinqueangularis</i> Ratzeburg, 1852</p>							Ireland		added by Horstmann (1974); omitted by Fitton (1978)
300269	Animalia		Arthropoda			Insecta			Hymenoptera			Ichneumonoidea	Ichneumonidae	CAMPOPLEGINAE			Bathyplectes		rostratus				(Thomson, 1887)	<p style="margin-left: 40px;"><i>Canidia rostrata</i> Thomson, 1887</p>							Scotland, Ireland
300270	Animalia		Arthropoda			Insecta			Hymenoptera			Ichneumonoidea	Ichneumonidae	CAMPOPLEGINAE			Bathyplectes		rufipes				Horstmann, 1974								England		NMS, det. Horstmann, added here
300271	Animalia		Arthropoda			Insecta			Hymenoptera			Ichneumonoidea	Ichneumonidae	CAMPOPLEGINAE			Bathyplectes		tibiator				(Gravenhorst, 1820)	<p style="margin-left: 40px;"><i>Ichneumon tibiator</i> Gravenhorst, 1820</p><p style="margin-left: 40px;"><i>corvinus</i> (Thomson, 1887, <i>Canidia</i>)</p>							England		NHM, added here
300272	Animalia		Arthropoda			Insecta			Hymenoptera			Ichneumonoidea	Ichneumonidae	CAMPOPLEGINAE			Callidora						Förster, 1869	<p style="margin-left: 40px;"><i>PANTROPA</i> Förster, 1869</p><p style="margin-left: 40px;"><i>NEOCALLIDORA</i> Ozols, 1966</p>
300273	Animalia		Arthropoda			Insecta			Hymenoptera			Ichneumonoidea	Ichneumonidae	CAMPOPLEGINAE			Callidora		analis				(Gravenhorst, 1829)	<p style="margin-left: 40px;"><i>Campoplex analis</i> Gravenhorst, 1829</p>							England		NMS, det. Horstmann, added here
300274	Animalia		Arthropoda			Insecta			Hymenoptera			Ichneumonoidea	Ichneumonidae	CAMPOPLEGINAE			Campoletis						Förster, 1869	<p style="margin-left: 40px;"><i>ANILASTUS</i> Förster, 1869</p><p style="margin-left: 40px;"><i>ECPHORA</i> Förster, 1869</p><p style="margin-left: 40px;"><i>ANILASTA</i> Thomson, 1877</p><p style="margin-left: 40px;"><i>ECPHOROPSIS</i> Ashmead, 1900</p>
300275	Animalia		Arthropoda			Insecta			Hymenoptera			Ichneumonoidea	Ichneumonidae	CAMPOPLEGINAE			Campoletis		agilis				(Holmgren, 1860)	<p style="margin-left: 40px;"><i>Sagaritis agilis</i> Holmgren, 1860</p>							Ireland
300276	Animalia		Arthropoda			Insecta			Hymenoptera			Ichneumonoidea	Ichneumonidae	CAMPOPLEGINAE			Campoletis		annulata				(Gravenhorst, 1829)	<p style="margin-left: 40px;"><i>Campoplex annulatus</i> Gravenhorst, 1829</p><p style="margin-left: 40px;"><i>maculipes</i> (Tschek, 1871, <i>Sagaritis</i>)</p><p style="margin-left: 40px;"><i>trochanterata</i> (Kriechbaumer, 1894, <i>Sagaritis</i>)</p><p style="margin-left: 40px;"><i>nigripes</i> (Seyrig, 1928, <i>Sagaritis</i>)</p>							England, Scotland, Ireland
300277	Animalia		Arthropoda			Insecta			Hymenoptera			Ichneumonoidea	Ichneumonidae	CAMPOPLEGINAE			Campoletis		cognata				(Tschek, 1871)	<p style="margin-left: 40px;"><i>Sagaritis cognata</i> Tschek, 1871</p>
300278	Animalia		Arthropoda			Insecta			Hymenoptera			Ichneumonoidea	Ichneumonidae	CAMPOPLEGINAE			Campoletis		crassicornis				(Tschek, 1871)	<p style="margin-left: 40px;"><i>Sagaritis crassicornis</i> Tschek, 1871</p><p style="margin-left: 40px;"><i>brachycera</i> (Thomson, 1877, <i>Sagaritis</i>)</p>							England, Scotland, Ireland
300279	Animalia		Arthropoda			Insecta			Hymenoptera			Ichneumonoidea	Ichneumonidae	CAMPOPLEGINAE			Campoletis		dilatator				(Thunberg, 1824)	<p style="margin-left: 40px;"><i>Ichneumon dilatator</i> Thunberg, 1824</p><p style="margin-left: 40px;"><i>mediator</i> (Zetterstedt, 1838, <i>Porizon</i>)</p>							Ireland
300280	Animalia		Arthropoda			Insecta			Hymenoptera			Ichneumonoidea	Ichneumonidae	CAMPOPLEGINAE			Campoletis		ensator				(Gravenhorst, 1829)	<p style="margin-left: 40px;"><i>Campoplex ensator</i> Gravenhorst, 1829</p><p style="margin-left: 40px;"><i>holmgreni</i> (Tschek, 1871, <i>Sagaritis</i>)</p>							England, Scotland, Ireland
300281	Animalia		Arthropoda			Insecta			Hymenoptera			Ichneumonoidea	Ichneumonidae	CAMPOPLEGINAE			Campoletis		fasciata				(Bridgman, 1888)	<p style="margin-left: 40px;"><i>Sagaritis fasciata</i> Bridgman, 1888</p>							England
300282	Animalia		Arthropoda			Insecta			Hymenoptera			Ichneumonoidea	Ichneumonidae	CAMPOPLEGINAE			Campoletis		femoralis				(Gravenhorst, 1829)	<p style="margin-left: 40px;"><i>Campoplex femoralis</i> Gravenhorst, 1829</p><p style="margin-left: 40px;"><i>laticollis</i> (Holmgren, 1860, <i>Sagaritis</i>)</p>							Ireland
300283	Animalia		Arthropoda			Insecta			Hymenoptera			Ichneumonoidea	Ichneumonidae	CAMPOPLEGINAE			Campoletis		fuscipes				(Holmgren, 1856)	<p style="margin-left: 40px;"><i>Campoplex fuscipes</i> Holmgren, 1856</p><p style="margin-left: 40px;"><i>semirufa</i> (Szépligeti, 1916, <i>Omorgus</i>)</p>							England, Ireland
300284	Animalia		Arthropoda			Insecta			Hymenoptera			Ichneumonoidea	Ichneumonidae	CAMPOPLEGINAE			Campoletis		incisa				(Bridgman, 1883)	<p style="margin-left: 40px;"><i>Sagaritis incisa</i> Bridgman, 1883</p>							Ireland
300285	Animalia		Arthropoda			Insecta			Hymenoptera			Ichneumonoidea	Ichneumonidae	CAMPOPLEGINAE			Campoletis		latrator				(Gravenhorst, 1829)	<p style="margin-left: 40px;"><i>Campoplex latrator</i> Gravenhorst, 1829</p><p style="margin-left: 40px;"><i>assimilis</i> (Gravenhorst, 1829, <i>Campoplex</i>)</p><p style="margin-left: 40px;"><i>mitis</i> (Holmgren, 1860, <i>Sagaritis</i>)</p><p style="margin-left: 40px;"><i>latratrix</i> (Schulz, 1906, <i>Sagaritis</i>)</p><p style="margin-left: 40px;"><i>bicingulata</i> (Szépligeti, 1916, <i…							England, Scotland, Ireland, Isle of Man		Horstmann (2000d) shows that this is not a junior homonym (treated as such in Yu &amp; Horstmann, 1997).
300286	Animalia		Arthropoda			Insecta			Hymenoptera			Ichneumonoidea	Ichneumonidae	CAMPOPLEGINAE			Campoletis		postica				(Bridgman &amp; Fitch, 1885)	<p style="margin-left: 40px;"><i>Sagaritis postica</i> Bridgman &amp; Fitch, 1885</p><p style="margin-left: 40px;"><i>postica</i> (Bridgman, 1886, <i>Sagaritis</i>)</p>							England, Scotland, Ireland
300287	Animalia		Arthropoda			Insecta			Hymenoptera			Ichneumonoidea	Ichneumonidae	CAMPOPLEGINAE			Campoletis		punctata				(Bridgman, 1886)	<p style="margin-left: 40px;"><i>Sagaritis punctata</i> Bridgman, 1886</p>							England, Scotland, Ireland
300288	Animalia		Arthropoda			Insecta			Hymenoptera			Ichneumonoidea	Ichneumonidae	CAMPOPLEGINAE			Campoletis		rapax				(Gravenhorst, 1829)	<p style="margin-left: 40px;"><i>Campoplex rapax</i> Gravenhorst, 1829</p><p style="margin-left: 40px;"><i>erythropus</i> (Thomson, 1887, <i>Sagaritis</i>)</p><p style="margin-left: 40px;"><i>curticaudis</i> (Szépligeti, 1916, <i>Omorgus</i>)</p>							England, Scotland, Wales, Ireland		J.F. Perkins, in his curation of the NHM collection, applied the name rapax Grav. to a species of Hyposoter; Campoletis specimens are under erythropus (Thomson).
300289	Animalia		Arthropoda			Insecta			Hymenoptera			Ichneumonoidea	Ichneumonidae	CAMPOPLEGINAE			Campoletis		raptor				(Zetterstedt, 1838)	<p style="margin-left: 40px;"><i>Porizon raptor</i> Zetterstedt, 1838</p><p style="margin-left: 40px;"><i>raptrix</i> (Schulz, 1906, <i>Sagaritis</i>)</p><p style="margin-left: 40px;"><i>dubiosa</i> (Szépligeti, 1916, <i>Omorgus</i>)</p><p style="margin-left: 40px;"><i>rufator</i> Aubert, 1960</p>
300290	Animalia		Arthropoda			Insecta			Hymenoptera			Ichneumonoidea	Ichneumonidae	CAMPOPLEGINAE			Campoletis		thomsoni				(Roman, 1915)	<p style="margin-left: 40px;"><i>Sagaritis thomsoni</i> Roman, 1915</p>							England, Scotland		NMS, det. Horstmann, added here
300291	Animalia		Arthropoda			Insecta			Hymenoptera			Ichneumonoidea	Ichneumonidae	CAMPOPLEGINAE			Campoletis		trichoptili				(Bauer, 1936)	<p style="margin-left: 40px;"><i>Sagaritis trichoptili</i> Bauer, 1936</p>							England		NMS, det. Horstmann, added here
300292	Animalia		Arthropoda			Insecta			Hymenoptera			Ichneumonoidea	Ichneumonidae	CAMPOPLEGINAE			Campoletis		varians				(Thomson, 1887)	<p style="margin-left: 40px;"><i>Sagaritis varians</i> Thomson, 1887</p><p style="margin-left: 40px;"><i>completa</i> (Szépligeti, 1916, <i>Omorgus</i>)</p>							England, Scotland, Wales, Ireland		added by Johnson (1929); only known originally from Ireland so omitted by Fitton (1978); also specimens in NMS and NHM, det. K. Horstmann.
300293	Animalia		Arthropoda			Insecta			Hymenoptera			Ichneumonoidea	Ichneumonidae	CAMPOPLEGINAE			Campoletis		viennensis				(Gravenhorst, 1829)	<p style="margin-left: 40px;"><i>Campoplex viennensis</i> Gravenhorst, 1829</p><p style="margin-left: 40px;"><i>annulator</i> (Zetterstedt, 1838, <i>Porizon</i>)</p><p style="margin-left: 40px;"><i>vexans</i> (Holmgren, 1860, <i>Limneria</i>)</p><p style="margin-left: 40px;"><i>maculipes</i> (Strobl, 1904, <i>Anilasta</i>)</p><p style="margin-left: 40px;"><i>subdentata</i> (Hellén, 1949, <i>Sagar…							England, Ireland
300294	Animalia		Arthropoda			Insecta			Hymenoptera			Ichneumonoidea	Ichneumonidae	CAMPOPLEGINAE			Campoletis		vimmeri				(Gregor, 1935)	<p style="margin-left: 40px;"><i>Sagaritis vimmeri</i> Gregor, 1935</p>							Scotland		NMS, det. Riedel, added here
300295	Animalia		Arthropoda			Insecta			Hymenoptera			Ichneumonoidea	Ichneumonidae	CAMPOPLEGINAE			Campoletis		zonata				(Gravenhorst, 1829)	<p style="margin-left: 40px;"><i>Campoplex zonatus</i> Gravenhorst, 1829</p>							England, Scotland, Ireland
300296	Animalia		Arthropoda			Insecta			Hymenoptera			Ichneumonoidea	Ichneumonidae	CAMPOPLEGINAE			Campoplex						Gravenhorst, 1829	<p style="margin-left: 40px;"><i>DIORATICA</i> Förster, 1869</p><p style="margin-left: 40px;"><i>OMORGUS</i> Förster, 1869</p><p style="margin-left: 40px;"><i>OMORGA</i> Förster, 1869</p>									The Campoplex material in NHM was sorted and determined by J.F. Perkins and more recently identified by K. Horstmann. doubtfully placed species of Campoplex [arvensis Gravenhorst, 1829 nom. dub. ] Listed as Sinophorus arvensis by Fitton (1978), K. Horstmann (pers. comm.) has seen only the type specimen of this species, which remains uninterpreted at present. species excluded from the British and …
300297	Animalia		Arthropoda			Insecta			Hymenoptera			Ichneumonoidea	Ichneumonidae	CAMPOPLEGINAE			Campoplex		abbreviatus				(Brischke, 1880)	<p style="margin-left: 40px;"><i>Limneria abbreviata</i> Brischke, 1880</p>
300298	Animalia		Arthropoda			Insecta			Hymenoptera			Ichneumonoidea	Ichneumonidae	CAMPOPLEGINAE			Campoplex		alticolellae				Horstmann, 1980								England, Scotland, Wales		NMS, det. Horstmann, added here
300299	Animalia		Arthropoda			Insecta			Hymenoptera			Ichneumonoidea	Ichneumonidae	CAMPOPLEGINAE			Campoplex		bilobus				(Thomson, 1887)	<p style="margin-left: 40px;"><i>Omorga biloba</i> Thomson, 1887</p>							England
300300	Animalia		Arthropoda			Insecta			Hymenoptera			Ichneumonoidea	Ichneumonidae	CAMPOPLEGINAE			Campoplex		brevicornis				(Szépligeti, 1916)	<p style="margin-left: 40px;"><i>Omorgus brevicornis</i> Szépligeti, 1916</p><p style="margin-left: 40px;"><i>flavocinctus</i> (Seyrig, 1928, <i>Sagaritis</i>)</p>							England		NMS, det. Horstmann, added here
300301	Animalia		Arthropoda			Insecta			Hymenoptera			Ichneumonoidea	Ichneumonidae	CAMPOPLEGINAE			Campoplex		caloptiliae				Horstmann, 2013								England, Scotland		added by Horstmann (2013)
300302	Animalia		Arthropoda			Insecta			Hymenoptera			Ichneumonoidea	Ichneumonidae	CAMPOPLEGINAE			Campoplex		cingulatus				(Brischke, 1880)	<p style="margin-left: 40px;"><i>Limneria cingulata</i> Brischke, 1880</p>
300303	Animalia		Arthropoda			Insecta			Hymenoptera			Ichneumonoidea	Ichneumonidae	CAMPOPLEGINAE			Campoplex		continuus				(Thomson, 1887)	<p style="margin-left: 40px;"><i>Omorga continua</i> Thomson, 1887</p>							England		The true continuus has been identified by K. Horstmann (specimen in NMS; see note under pyraustae).
300304	Animalia		Arthropoda			Insecta			Hymenoptera			Ichneumonoidea	Ichneumonidae	CAMPOPLEGINAE			Campoplex		coracinus				(Thomson, 1887)	<p style="margin-left: 40px;"><i>Omorga coracina</i> Thomson, 1887</p><p style="margin-left: 40px;"><i>submarginatus</i> (Bridgman, 1899, <i>Limneria</i>)</p>							England
300305	Animalia		Arthropoda			Insecta			Hymenoptera			Ichneumonoidea	Ichneumonidae	CAMPOPLEGINAE			Campoplex		crassus				Horstmann, 1980								England		NMS, det. Horstmann, added here
300306	Animalia		Arthropoda			Insecta			Hymenoptera			Ichneumonoidea	Ichneumonidae	CAMPOPLEGINAE			Campoplex		cursitans				(Holmgren, 1860)	<p style="margin-left: 40px;"><i>Limneria cursitans</i> Holmgren, 1860</p>							England, Ireland
300307	Animalia		Arthropoda			Insecta			Hymenoptera			Ichneumonoidea	Ichneumonidae	CAMPOPLEGINAE			Campoplex		deficiens				Gravenhorst, 1829	<p style="margin-left: 40px;"><i>algerica</i> (Habermehl, 1922, <i>Omorga</i>)</p>							England		Listed as Venturia deficiens by Yu &amp; Horstmann (1997) but treated as a species of Campoplex by Horstmann (2000d). Has been misidentified as Campoplex difformis.
300308	Animalia		Arthropoda			Insecta			Hymenoptera			Ichneumonoidea	Ichneumonidae	CAMPOPLEGINAE			Campoplex		difformis				(Gmelin, 1790)	<p style="margin-left: 40px;"><i>Ichneumon difformis</i> Gmelin, 1790</p><p style="margin-left: 40px;"><i>lineolatus</i> Ratzeburg, 1844</p><p style="margin-left: 40px;"><i>mutabilis</i> (Holmgren, 1860, <i>Limneria</i>)</p>							England, Ireland
300309	Animalia		Arthropoda			Insecta			Hymenoptera			Ichneumonoidea	Ichneumonidae	CAMPOPLEGINAE			Campoplex		eudoniae				Horstmann &amp; Yu, 1999	<p style="margin-left: 40px;"><i>rufipes</i> (Bridgman, 1883, <i>Nemeritis</i>)</p><p style="margin-left: 40px;"><i>ruficoxa</i> (Thomson, 1887, <i>Omorga</i>)</p>							England, Scotland, Ireland		some distribution data from Horstmann &amp; Yu (1999)
300310	Animalia		Arthropoda			Insecta			Hymenoptera			Ichneumonoidea	Ichneumonidae	CAMPOPLEGINAE			Campoplex		faunus				Gravenhorst, 1829	<p style="margin-left: 40px;"><i>xanthocarpus</i> (Szépligeti, 1916, <i>Omorgus</i>)</p>							England, Ireland
300311	Animalia		Arthropoda			Insecta			Hymenoptera			Ichneumonoidea	Ichneumonidae	CAMPOPLEGINAE			Campoplex		formosanae				Horstmann, 2012								England		NMS, det. Horstmann, added here
300312	Animalia		Arthropoda			Insecta			Hymenoptera			Ichneumonoidea	Ichneumonidae	CAMPOPLEGINAE			Campoplex		fusciplica				(Thomson, 1887)	<p style="margin-left: 40px;"><i>Omorga fusciplica</i> Thomson, 1887</p>
300313	Animalia		Arthropoda			Insecta			Hymenoptera			Ichneumonoidea	Ichneumonidae	CAMPOPLEGINAE			Campoplex		hadrocerus				(Thomson, 1887)	<p style="margin-left: 40px;"><i>Omorga hadrocera</i> Thomson, 1887</p><p style="margin-left: 40px;"><i>fasciatus</i> (Bridgman, 1889, <i>Limneria</i>)</p>							England, Ireland
300314	Animalia		Arthropoda			Insecta			Hymenoptera			Ichneumonoidea	Ichneumonidae	CAMPOPLEGINAE			Campoplex		interruptus				Horstmann, 1993								England, Scotland		NMS, det. Horstmann, added here
300315	Animalia		Arthropoda			Insecta			Hymenoptera			Ichneumonoidea	Ichneumonidae	CAMPOPLEGINAE			Campoplex		investigator				(Habermehl, 1923)	<p style="margin-left: 40px;"><i>Omorga investigator</i> Habermehl, 1923</p>							England		NMS, det. Horstmann, added here
300316	Animalia		Arthropoda			Insecta			Hymenoptera			Ichneumonoidea	Ichneumonidae	CAMPOPLEGINAE			Campoplex		jaeckhi				(Bauer, 1936)	<p style="margin-left: 40px;"><i>Dioctes jaeckhi</i> Bauer, 1936</p>							England		added by Horstmann (2012b)
300317	Animalia		Arthropoda			Insecta			Hymenoptera			Ichneumonoidea	Ichneumonidae	CAMPOPLEGINAE			Campoplex		lugubrinus				(Holmgren, 1860)	<p style="margin-left: 40px;"><i>Limneria lugubrina</i> Holmgren, 1860</p><p style="margin-left: 40px;"><i>pusillus</i> (Szépligeti, 1916, <i>Angitia</i>)</p>							England, Scotland, Ireland
300318	Animalia		Arthropoda			Insecta			Hymenoptera			Ichneumonoidea	Ichneumonidae	CAMPOPLEGINAE			Campoplex		lyratus				(Thomson, 1887)	<p style="margin-left: 40px;"><i>Omorga lyrata</i> Thomson, 1887</p>							England, Scotland, Wales, Ireland, Isle of Man		added by Shaw (1984)
300319	Animalia		Arthropoda			Insecta			Hymenoptera			Ichneumonoidea	Ichneumonidae	CAMPOPLEGINAE			Campoplex		melanostictus				Gravenhorst, 1829								England, Scotland
300320	Animalia		Arthropoda			Insecta			Hymenoptera			Ichneumonoidea	Ichneumonidae	CAMPOPLEGINAE			Campoplex		molestus				Gravenhorst, 1829								England
300321	Animalia		Arthropoda			Insecta			Hymenoptera			Ichneumonoidea	Ichneumonidae	CAMPOPLEGINAE			Campoplex		multicinctus				Gravenhorst, 1829	<p style="margin-left: 40px;"><i>excentricus</i> (Bauer, 1937, <i>Omorgus</i>)</p>							England, Ireland
300322	Animalia		Arthropoda			Insecta			Hymenoptera			Ichneumonoidea	Ichneumonidae	CAMPOPLEGINAE			Campoplex		ovatus				(Brischke, 1880)	<p style="margin-left: 40px;"><i>Limneria ovata</i> Brischke, 1880</p>							England, Scotland
300323	Animalia		Arthropoda			Insecta			Hymenoptera			Ichneumonoidea	Ichneumonidae	CAMPOPLEGINAE			Campoplex		procerus				(Brischke, 1880)	<p style="margin-left: 40px;"><i>Limneria procera</i> Brischke, 1880</p>
300324	Animalia		Arthropoda			Insecta			Hymenoptera			Ichneumonoidea	Ichneumonidae	CAMPOPLEGINAE			Campoplex		psammae				(Morley, 1915)	<p style="margin-left: 40px;"><i>Omorga psammae</i> Morley, 1915</p>							England, Scotland, Ireland		Described as a variety of Omorga (=Campoplex) ensator (Grav., 1829) and listed as Campoplex psammae by Fitton (1978) but not not listed in Yu &amp; Horstmann (1997) and treated, without justification, as a subspecies of ensator by Yu et al. (2012). Horstmann (2012b) regarded this as a valid species.
300325	Animalia		Arthropoda			Insecta			Hymenoptera			Ichneumonoidea	Ichneumonidae	CAMPOPLEGINAE			Campoplex		punctipleuris				Horstmann, 1980	<p style="margin-left: 40px;"><i>alhpictus</i> (Pfankuch, 1924, <i>Omorga</i>)</p><p style="margin-left: 40px;"><i>albipictus</i> Horstmann</p>							England, Scotland, Wales		added by Horstmann (1980)
300326	Animalia		Arthropoda			Insecta			Hymenoptera			Ichneumonoidea	Ichneumonidae	CAMPOPLEGINAE			Campoplex		punctulatus				(Szépligeti, 1916)	<p style="margin-left: 40px;"><i>Omorgus punctulatus</i> Szépligeti, 1916</p>							England, Scotland, Ireland		NHM, NMS, det. Horstmann, added here
300327	Animalia		Arthropoda			Insecta			Hymenoptera			Ichneumonoidea	Ichneumonidae	CAMPOPLEGINAE			Campoplex		pyraustae				Smith, 1931	<p style="margin-left: 40px;"><i>continuus</i> misident.</p>							England, Scotland, Wales, Ireland, Isle of Man		added by Shaw &amp; Aeschlimann (1994);
300328	Animalia		Arthropoda			Insecta			Hymenoptera			Ichneumonoidea	Ichneumonidae	CAMPOPLEGINAE			Campoplex		ramidulus				(Brischke, 1880)	<p style="margin-left: 40px;"><i>Limneria ramidula</i> Brischke, 1880</p>							England
300329	Animalia		Arthropoda			Insecta			Hymenoptera			Ichneumonoidea	Ichneumonidae	CAMPOPLEGINAE			Campoplex		raschkiellae				Horstmann, 1980								England, Scotland		added by Horstmann (1980)
300330	Animalia		Arthropoda			Insecta			Hymenoptera			Ichneumonoidea	Ichneumonidae	CAMPOPLEGINAE			Campoplex		restrictor				Aubert, 1960								England		added by Shaw (1981a)
300331	Animalia		Arthropoda			Insecta			Hymenoptera			Ichneumonoidea	Ichneumonidae	CAMPOPLEGINAE			Campoplex		rothii				(Holmgren, 1860)	<p style="margin-left: 40px;"><i>Limneria rothii</i> Holmgren, 1860</p>							England, Scotland
300332	Animalia		Arthropoda			Insecta			Hymenoptera			Ichneumonoidea	Ichneumonidae	CAMPOPLEGINAE			Campoplex		rufipes				Gravenhorst, 1829	<p style="margin-left: 40px;"><i>angulatus</i> (Thomson, 1887, <i>Omorga</i>)</p>							England, Scotland, Ireland
300333	Animalia		Arthropoda			Insecta			Hymenoptera			Ichneumonoidea	Ichneumonidae	CAMPOPLEGINAE			Campoplex		striatus				Horstmann, 1985								England		NHM, det. Horstmann, added here
300334	Animalia		Arthropoda			Insecta			Hymenoptera			Ichneumonoidea	Ichneumonidae	CAMPOPLEGINAE			Campoplex		sulcatus				Horstmann, 1985								England, Scotland, Isle of Man		added by Horstmann (1985)
300335	Animalia		Arthropoda			Insecta			Hymenoptera			Ichneumonoidea	Ichneumonidae	CAMPOPLEGINAE			Campoplex		tibialis				(Szépligeti, 1916)	<p style="margin-left: 40px;"><i>Nemeritis tibialis</i> Szépligeti, 1916</p><p style="margin-left: 40px;"><i>dioszeghyi</i> (Kiss, 1929, <i>Omorgus</i>)</p><p style="margin-left: 40px;"><i>corsicator</i> Aubert, 1960</p>							England, Wales		NHM, det. Horstmann, added here; also some Scottish specimens in NMS, tentatively identified as this species by K. Horstmann.
300336	Animalia		Arthropoda			Insecta			Hymenoptera			Ichneumonoidea	Ichneumonidae	CAMPOPLEGINAE			Campoplex		tumidulus				Gravenhorst, 1829	<p style="margin-left: 40px;"><i>ensator</i> misident.</p><p style="margin-left: 40px;"><i>nigrifemur</i> (Seyrig, 1928, <i>Omorgus</i>)</p><p style="margin-left: 40px;"><i>rufinator</i> Aubert, 1971</p>							England, Scotland, Wales, Ireland, Isle of Man		Recorded as Campoplex rufinator by Shaw (1984) and Shaw &amp; Aeschlimann (1994).
300337	Animalia		Arthropoda			Insecta			Hymenoptera			Ichneumonoidea	Ichneumonidae	CAMPOPLEGINAE			Campoplex		tussilaginis				Horstmann, 2013								England		added by Horstmann (2013)
300338	Animalia		Arthropoda			Insecta			Hymenoptera			Ichneumonoidea	Ichneumonidae	CAMPOPLEGINAE			Campoplex		unicingulatus				(Schmiedeknecht, 1909)	<p style="margin-left: 40px;"><i>Omorgus unicingulatus</i> Schmiedeknecht, 1909</p>							England, Scotland, Isle of Man		added by Horstmann (1985)
300339	Animalia		Arthropoda			Insecta			Hymenoptera			Ichneumonoidea	Ichneumonidae	CAMPOPLEGINAE			Campoplex		variabilis				(Bridgman, 1886)	<p style="margin-left: 40px;"><i>Limneria variabilis</i> Bridgman, 1886</p>							England
300340	Animalia		Arthropoda			Insecta			Hymenoptera			Ichneumonoidea	Ichneumonidae	CAMPOPLEGINAE			Campoplex		volubilis				(Holmgren, 1860)	<p style="margin-left: 40px;"><i>Limneria volubilis</i> Holmgren, 1860</p><p style="margin-left: 40px;"><i>anterior</i> Aubert, 1960]</p>							Scotland		NMS, det. Horstmann, added here
300341	Animalia		Arthropoda			Insecta			Hymenoptera			Ichneumonoidea	Ichneumonidae	CAMPOPLEGINAE			Casinaria						Holmgren, 1859	<p style="margin-left: 40px;"><i>AMORPHOTA</i> Förster, 1869</p><p style="margin-left: 40px;"><i>ANEMPHERES</i> Förster, 1869</p><p style="margin-left: 40px;"><i>CAMPOTREPHUS</i> Förster, 1869</p><p style="margin-left: 40px;"><i>HOROGENES</i> Förster, 1869</p><p style="margin-left: 40px;"><i>NOTHANOMALON</i> Szépligeti, 1905</p><p style="margin-left: 40px;"><i>TROPHOCAMPA</i> Schmiedeknecht, 1907…
300342	Animalia		Arthropoda			Insecta			Hymenoptera			Ichneumonoidea	Ichneumonidae	CAMPOPLEGINAE			Casinaria		affinis				Tschek, 1871								Ireland
300343	Animalia		Arthropoda			Insecta			Hymenoptera			Ichneumonoidea	Ichneumonidae	CAMPOPLEGINAE			Casinaria		albipalpis				(Gravenhorst, 1829)	<p style="margin-left: 40px;"><i>Campoplex albipalpis</i> Gravenhorst, 1829</p>							Ireland
300344	Animalia		Arthropoda			Insecta			Hymenoptera			Ichneumonoidea	Ichneumonidae	CAMPOPLEGINAE			Casinaria		ischnogaster				Thomson, 1887								England, Ireland
300345	Animalia		Arthropoda			Insecta			Hymenoptera			Ichneumonoidea	Ichneumonidae	CAMPOPLEGINAE			Casinaria		moesta				(Gravenhorst, 1829)	<p style="margin-left: 40px;"><i>Campoplex moestus</i> Gravenhorst, 1829</p><p style="margin-left: 40px;"><i>maesta</i> Dalla Torre, 1901</p>							England		added by Horstmann (2000d)
300346	Animalia		Arthropoda			Insecta			Hymenoptera			Ichneumonoidea	Ichneumonidae	CAMPOPLEGINAE			Casinaria		morionella				Holmgren, 1860								England
300347	Animalia		Arthropoda			Insecta			Hymenoptera			Ichneumonoidea	Ichneumonidae	CAMPOPLEGINAE			Casinaria		pallipes				Brischke, 1880	<p style="margin-left: 40px;"><i>pallidipes</i> Dalla Torre, 1901</p>							England, Ireland
300348	Animalia		Arthropoda			Insecta			Hymenoptera			Ichneumonoidea	Ichneumonidae	CAMPOPLEGINAE			Casinaria		petiolaris				(Gravenhorst, 1829)	<p style="margin-left: 40px;"><i>Mesoleptus petiolaris</i> Gravenhorst, 1829</p><p style="margin-left: 40px;"><i>claviventris</i> Holmgren, 1860</p>							England
300349	Animalia		Arthropoda			Insecta			Hymenoptera			Ichneumonoidea	Ichneumonidae	CAMPOPLEGINAE			Casinaria		tenuiventris				(Gravenhorst, 1829)	<p style="margin-left: 40px;"><i>Campoplex tenuiventris</i> Gravenhorst, 1829</p><p style="margin-left: 40px;"><i>conica</i> (Ratzeburg, 1844, <i>Campoplex</i>)</p><p style="margin-left: 40px;"><i>latifrons</i> Holmgren, 1860</p><p style="margin-left: 40px;"><i>protensa</i> Thomson, 1887</p>							England
300350	Animalia		Arthropoda			Insecta			Hymenoptera			Ichneumonoidea	Ichneumonidae	CAMPOPLEGINAE			Charops						Holmgren, 1859
300351	Animalia		Arthropoda			Insecta			Hymenoptera			Ichneumonoidea	Ichneumonidae	CAMPOPLEGINAE			Charops		cantator				(DeGeer, 1778)	<p style="margin-left: 40px;"><i>Ichneumon cantator</i> DeGeer, 1778</p><p style="margin-left: 40px;"><i>decipiens</i> (Gravenhorst, 1829, <i>Campoplex</i>)</p><p style="margin-left: 40px;"><i>tenuitarsus</i> (Gravenhorst, 1829, <i>Anomalon</i>)</p><p style="margin-left: 40px;"><i>nigropetiolatus</i> Strobl, 1904</p><p style="margin-left: 40px;"><i>nigrifacies</i> (Kiss, 1924, <i>Anomalon</i>)</p>							England, Wales
300352	Animalia		Arthropoda			Insecta			Hymenoptera			Ichneumonoidea	Ichneumonidae	CAMPOPLEGINAE			Clypeoplex						Horstmann, 1987
300353	Animalia		Arthropoda			Insecta			Hymenoptera			Ichneumonoidea	Ichneumonidae	CAMPOPLEGINAE			Clypeoplex		cerophagus				(Gravenhorst, 1829)	<p style="margin-left: 40px;"><i>Campoplex cerophagus</i> Gravenhorst, 1829</p><p style="margin-left: 40px;"><i>picticrus</i> (Thomson, 1887, <i>Omorga</i>)</p>							England, Scotland		NHM, NMS, UM, added here
300354	Animalia		Arthropoda			Insecta			Hymenoptera			Ichneumonoidea	Ichneumonidae	CAMPOPLEGINAE			Cymodusa						Holmgren, 1859	<p style="margin-left: 40px;"><i>SAGARITIS</i> Holmgren, 1859</p><p style="margin-left: 40px;"><i>THERSITIA</i> Schmiedeknecht, 1907</p><p style="margin-left: 40px;"><i>SAGARITOPSIS</i> Hincks, 1944</p>
300355	Animalia		Arthropoda			Insecta			Hymenoptera			Ichneumonoidea	Ichneumonidae	CAMPOPLEGINAE			Cymodusa		antennator				Holmgren, 1860	<p style="margin-left: 40px;"><i>flavipes</i> Brischke, 1880</p><p style="margin-left: 40px;"><i>anntenatrix</i> Schulz, 1906</p>							England, Scotland, Ireland
300356	Animalia		Arthropoda			Insecta			Hymenoptera			Ichneumonoidea	Ichneumonidae	CAMPOPLEGINAE			Cymodusa		cruentata				(Gravenhorst, 1829)	<p style="margin-left: 40px;"><i>Campoplex cruentata</i> Gravenhorst, 1829</p><p style="margin-left: 40px;"><i>marginella</i> (Zetterstedt, 1838, <i>Porizon</i>)</p><p style="margin-left: 40px;"><i>longicalcar</i> Thomson, 1887</p>							Scotland, Ireland
300357	Animalia		Arthropoda			Insecta			Hymenoptera			Ichneumonoidea	Ichneumonidae	CAMPOPLEGINAE			Cymodusa		declinator				(Gravenhorst, 1829)	<p style="margin-left: 40px;"><i>Campoplex declinator</i> Gravenhorst, 1829</p><p style="margin-left: 40px;"><i>fasciata</i> (Bridgman &amp; Fitch, 1885, <i>Thymaris</i>)</p><p style="margin-left: 40px;"><i>fasciata</i> (Bridgman, 1886, <i>Thymaris</i>)</p><p style="margin-left: 40px;"><i>declinatrix</i> (Schulz, 1906, <i>Sagaritis</i>)</p>							England, Scotland		The name declinator Grav. was applied to a species of Campoletis by J.F. Perkins in his curation of the NHM collection.
300358	Animalia		Arthropoda			Insecta			Hymenoptera			Ichneumonoidea	Ichneumonidae	CAMPOPLEGINAE			Cymodusa		exilis				Holmgren, 1860	<p style="margin-left: 40px;"><i>petulans</i> Holmgren, 1860</p><p style="margin-left: 40px;"><i>convergens</i> (Thomson, 1887, <i>Nemeritis</i>)</p>							England, Ireland
300359	Animalia		Arthropoda			Insecta			Hymenoptera			Ichneumonoidea	Ichneumonidae	CAMPOPLEGINAE			Cymodusa		leucocera				Holmgren, 1859	<p style="margin-left: 40px;"><i>pulchricornis</i> Szépligeti, 1901</p><p style="margin-left: 40px;"><i>egregia</i> (Schmiedeknecht, 1907, <i>Thersitia</i>)</p>							England, Scotland, Ireland
300360	Animalia		Arthropoda			Insecta			Hymenoptera			Ichneumonoidea	Ichneumonidae	CAMPOPLEGINAE			Diadegma						Förster, 1869	<p style="margin-left: 40px;"><i>ANGITIA</i> Holmgren, 1859</p><p style="margin-left: 40px;"><i>NYTHOBIA</i> Förster, 1869</p><p style="margin-left: 40px;"><i>PECTINELLA</i> Morley, 1915</p><p style="margin-left: 40px;"><i>NEOANGITIA</i> Horstmann, 1969</p><p style="margin-left: 40px;"><i>AUMA</i> Dbar, 1984</p>									Distribution data for some species (the ‘Nythobia’ group) taken from Shaw &amp; Horstmann (1997).
300361	Animalia		Arthropoda			Insecta			Hymenoptera			Ichneumonoidea	Ichneumonidae	CAMPOPLEGINAE			Diadegma		aculeatum				(Bridgman, 1889)	<p style="margin-left: 40px;"><i>Limneria aculeata</i> Bridgman, 1889</p><p style="margin-left: 40px;"><i>atrum</i> (Kokujev, 1915, <i>Angitia</i>)</p><p style="margin-left: 40px;"><i>politor</i> (Aubert, 1960, <i>Horogenes</i>)</p>							England, Wales
300362	Animalia		Arthropoda			Insecta			Hymenoptera			Ichneumonoidea	Ichneumonidae	CAMPOPLEGINAE			Diadegma		agile				(Brischke, 1880)	<p style="margin-left: 40px;"><i>Limneria agilis</i> Brischke, 1880</p>
300363	Animalia		Arthropoda			Insecta			Hymenoptera			Ichneumonoidea	Ichneumonidae	CAMPOPLEGINAE			Diadegma		angitiaeforma				Horstmann, 1969								England, Scotland		NMS, det. Horstmann, added here
300364	Animalia		Arthropoda			Insecta			Hymenoptera			Ichneumonoidea	Ichneumonidae	CAMPOPLEGINAE			Diadegma		angulator				(Aubert, 1963)	<p style="margin-left: 40px;"><i>Horogenes angulator</i> Aubert, 1963</p>							England, Ireland		NMS, det. Horstmann, added here
300365	Animalia		Arthropoda			Insecta			Hymenoptera			Ichneumonoidea	Ichneumonidae	CAMPOPLEGINAE			Diadegma		annulicrus				(Thomson, 1887)	<p style="margin-left: 40px;"><i>Angitia annulicrus</i> Thomson, 1887</p>
300366	Animalia		Arthropoda			Insecta			Hymenoptera			Ichneumonoidea	Ichneumonidae	CAMPOPLEGINAE			Diadegma		anurum				(Thomson, 1887)	<p style="margin-left: 40px;"><i>Angitia anura</i> Thomson, 1887</p>							England, Scotland		added by Shaw &amp; Horstmann (1997)
300367	Animalia		Arthropoda			Insecta			Hymenoptera			Ichneumonoidea	Ichneumonidae	CAMPOPLEGINAE			Diadegma		areolare				(Holmgren, 1860)	<p style="margin-left: 40px;"><i>Limneria areolaris</i> Holmgren, 1860</p>							Ireland		added by O’Connor et al. (2007); det. J.F. Perkins, also recorded from the Isle of Man by Walker (1872) but this may not be reliable.
300368	Animalia		Arthropoda			Insecta			Hymenoptera			Ichneumonoidea	Ichneumonidae	CAMPOPLEGINAE			Diadegma		argentellae				Horstmann, 2004								Scotland		added by Horstmann (2004a); described in the subgenus Nythobia but subgenera have not been used here.
300369	Animalia		Arthropoda			Insecta			Hymenoptera			Ichneumonoidea	Ichneumonidae	CAMPOPLEGINAE			Diadegma		armillatum				(Gravenhorst, 1829)	<p style="margin-left: 40px;"><i>Campoplex armillatus</i> Gravenhorst, 1829</p><p style="margin-left: 40px;"><i>tibiale</i> (Gravenhorst, 1829, <i>Campoplex</i>)</p><p style="margin-left: 40px;"><i>pseudocombinatum</i> (Szépligeti, 1916, <i>Angitia</i>)</p>							England, Scotland, Wales, Ireland		Diadegma monospilum (Thomson, 1887, Angitia) was removed from synonymy by Horstmann (2006d).
300370	Animalia		Arthropoda			Insecta			Hymenoptera			Ichneumonoidea	Ichneumonidae	CAMPOPLEGINAE			Diadegma		berberatae				Horstmann, 2013								England		added by Horstmann (2013)
300371	Animalia		Arthropoda			Insecta			Hymenoptera			Ichneumonoidea	Ichneumonidae	CAMPOPLEGINAE			Diadegma		brevipetiolatum				Horstmann, 1969								England		NMS, det. Horstmann, added here
300372	Animalia		Arthropoda			Insecta			Hymenoptera			Ichneumonoidea	Ichneumonidae	CAMPOPLEGINAE			Diadegma		brevivalve				(Thomson, 1887)	<p style="margin-left: 40px;"><i>Angitia brevivalvis</i> Thomson, 1887</p>							England		NMS, det. Horstmann, added here
300373	Animalia		Arthropoda			Insecta			Hymenoptera			Ichneumonoidea	Ichneumonidae	CAMPOPLEGINAE			Diadegma		callisto				Horstmann, 1993								Scotland		NMS, det. Horstmann, added here
300374	Animalia		Arthropoda			Insecta			Hymenoptera			Ichneumonoidea	Ichneumonidae	CAMPOPLEGINAE			Diadegma		chrysostictos				(Gmelin, 1790)	<p style="margin-left: 40px;"><i>Ichneumon chrysostictos</i> Gmelin, 1790</p><p style="margin-left: 40px;"><i>corsicator</i> (Aubert, 1961, <i>Horogenes</i>)</p><p style="margin-left: 40px;"><i>orientator</i> Aubert, 1965</p>							England, Scotland, Ireland		distribution data from Horstmann &amp; Shaw (1984)
300375	Animalia		Arthropoda			Insecta			Hymenoptera			Ichneumonoidea	Ichneumonidae	CAMPOPLEGINAE			Diadegma		claripenne				(Thomson, 1887)	<p style="margin-left: 40px;"><i>Angitia claripennis</i> Thomson, 1887</p>							Ireland		added by O’Connor et al. (2007); also a specimen lacking locality data in NHM, det. J.F. Perkins.
300376	Animalia		Arthropoda			Insecta			Hymenoptera			Ichneumonoidea	Ichneumonidae	CAMPOPLEGINAE			Diadegma		clavicorne				(Brischke, 1880)	<p style="margin-left: 40px;"><i>Limneria clavicornis</i> Brischke, 1880</p>
300377	Animalia		Arthropoda			Insecta			Hymenoptera			Ichneumonoidea	Ichneumonidae	CAMPOPLEGINAE			Diadegma		coleophorarum				(Ratzeburg, 1852)	<p style="margin-left: 40px;"><i>Campoplex coleophorarum</i> Ratzeburg, 1852</p>							England, Scotland
300378	Animalia		Arthropoda			Insecta			Hymenoptera			Ichneumonoidea	Ichneumonidae	CAMPOPLEGINAE			Diadegma		combinatum				(Holmgren, 1860)	<p style="margin-left: 40px;"><i>Limneria combinata</i> Holmgren, 1860</p><p style="margin-left: 40px;"><i>alpinator</i> Aubert, 1970</p>							England, Scotland, Ireland
300379	Animalia		Arthropoda			Insecta			Hymenoptera			Ichneumonoidea	Ichneumonidae	CAMPOPLEGINAE			Diadegma		compunctellae				Horstmann, 2013								Scotland		added by Horstmann (2013)
300380	Animalia		Arthropoda			Insecta			Hymenoptera			Ichneumonoidea	Ichneumonidae	CAMPOPLEGINAE			Diadegma		consumtor				(Gravenhorst, 1829)	<p style="margin-left: 40px;"><i>Campoplex consumtor</i> Gravenhorst, 1829</p><p style="margin-left: 40px;"><i>varians</i> (Brischke, 1880, <i>Limneria</i>)</p>
300381	Animalia		Arthropoda			Insecta			Hymenoptera			Ichneumonoidea	Ichneumonidae	CAMPOPLEGINAE			Diadegma		crassicorne				(Gravenhorst, 1829)	<p style="margin-left: 40px;"><i>Campoplex crassicornis</i> Gravenhorst, 1829</p><p style="margin-left: 40px;"><i>carnifex</i> (Gravenhorst, 1829, <i>Campoplex</i>)</p><p style="margin-left: 40px;"><i>brevicorne</i> (Holmgren, 1860, <i>Limneria</i>)</p><p style="margin-left: 40px;"><i>normannicum</i> (Rudow, 1883, <i>Limneria</i>)</p>							England, Scotland, Ireland		Listed as a species of Meloboris in Fitton (1978); some distribution data from Horstmann (2000d)
300382	Animalia		Arthropoda			Insecta			Hymenoptera			Ichneumonoidea	Ichneumonidae	CAMPOPLEGINAE			Diadegma		crassiseta				(Thomson, 1887)	<p style="margin-left: 40px;"><i>Angitia crassiseta</i> Thomson, 1887</p>							England		NHM, det. Perkins, added here
300383	Animalia		Arthropoda			Insecta			Hymenoptera			Ichneumonoidea	Ichneumonidae	CAMPOPLEGINAE			Diadegma		crassum				(Bridgman, 1889)	<p style="margin-left: 40px;"><i>Limneria crassa</i> Bridgman, 1889</p>							England, Scotland
300384	Animalia		Arthropoda			Insecta			Hymenoptera			Ichneumonoidea	Ichneumonidae	CAMPOPLEGINAE			Diadegma		crataegi				Horstmann, 1980								England, Scotland		added by Horstmann (1980)
300385	Animalia		Arthropoda			Insecta			Hymenoptera			Ichneumonoidea	Ichneumonidae	CAMPOPLEGINAE			Diadegma		cylindricum				(Brischke, 1880)	<p style="margin-left: 40px;"><i>Limneria cylindrica</i> Brischke, 1880</p>							England, Ireland		Noted as occurring in England and Ireland by various authors but not listed by Fitton (1978).
300386	Animalia		Arthropoda			Insecta			Hymenoptera			Ichneumonoidea	Ichneumonidae	CAMPOPLEGINAE			Diadegma		duplicatum				Horstmann, 1980								England, Scotland		added by Shaw &amp; Horstmann (1997)
300387	Animalia		Arthropoda			Insecta			Hymenoptera			Ichneumonoidea	Ichneumonidae	CAMPOPLEGINAE			Diadegma		elishae				(Bridgman, 1884)	<p style="margin-left: 40px;"><i>Limneria elishae</i> Bridgman, 1884</p>							England, Scotland, Ireland
300388	Animalia		Arthropoda			Insecta			Hymenoptera			Ichneumonoidea	Ichneumonidae	CAMPOPLEGINAE			Diadegma		ericinellae				Horstmann, 2013								England		added by Horstmann (2013)
300389	Animalia		Arthropoda			Insecta			Hymenoptera			Ichneumonoidea	Ichneumonidae	CAMPOPLEGINAE			Diadegma		erucator				(Zetterstedt, 1838)	<p style="margin-left: 40px;"><i>Porizon erucator</i> Zetterstedt, 1838</p><p style="margin-left: 40px;"><i>rufipes</i> misident.</p><p style="margin-left: 40px;"><i>fumipennis</i> (Holmgren, 1856, <i>Campoplex</i>)</p>							England, Scotland, Ireland
300390	Animalia		Arthropoda			Insecta			Hymenoptera			Ichneumonoidea	Ichneumonidae	CAMPOPLEGINAE			Diadegma		exareolator				Aubert, 1964								England, Scotland, Ireland		added by Shaw &amp; Horstmann (1997)
300391	Animalia		Arthropoda			Insecta			Hymenoptera			Ichneumonoidea	Ichneumonidae	CAMPOPLEGINAE			Diadegma		fabricianae				Horstmann &amp; Shaw, 1984								England, Scotland, Wales		added by Horstmann &amp; Shaw (1984)
300392	Animalia		Arthropoda			Insecta			Hymenoptera			Ichneumonoidea	Ichneumonidae	CAMPOPLEGINAE			Diadegma		fenestrale				(Holmgren, 1860)	<p style="margin-left: 40px;"><i>Limneria fenestralis</i> Holmgren, 1860</p><p style="margin-left: 40px;"><i>?gracile</i> (Gravenhorst, 1829, <i>Campoplex</i>)</p>							England, Scotland, Wales, Ireland, Isle of Man		distribution data from Azidah et al. (2000) and NMS
300393	Animalia		Arthropoda			Insecta			Hymenoptera			Ichneumonoidea	Ichneumonidae	CAMPOPLEGINAE			Diadegma		flexum				Horstmann, 1973								England		NMS, det. Horstmann, added here
300394	Animalia		Arthropoda			Insecta			Hymenoptera			Ichneumonoidea	Ichneumonidae	CAMPOPLEGINAE			Diadegma		fungicola				Horstmann, 2008								England		added by Horstmann (2008a)
300395	Animalia		Arthropoda			Insecta			Hymenoptera			Ichneumonoidea	Ichneumonidae	CAMPOPLEGINAE			Diadegma		grisescens				(Gravenhorst, 1829)	<p style="margin-left: 40px;"><i>Mesoleptus grisescens</i> Gravenhorst, 1829</p><p style="margin-left: 40px;"><i>rufiventris</i> (Gravenhorst, 1829, <i>Campoplex</i>)</p><p style="margin-left: 40px;"><i>hydropota</i> (Holmgren, 1860, <i>Limneria</i>)</p>							England, Scotland, Ireland
300396	Animalia		Arthropoda			Insecta			Hymenoptera			Ichneumonoidea	Ichneumonidae	CAMPOPLEGINAE			Diadegma		holopygum				(Thomson, 1887)	<p style="margin-left: 40px;"><i>Angitia holopyga</i> Thomson, 1887</p>							England, Scotland, Ireland
300397	Animalia		Arthropoda			Insecta			Hymenoptera			Ichneumonoidea	Ichneumonidae	CAMPOPLEGINAE			Diadegma		hygrobium				(Thomson, 1887)	<p style="margin-left: 40px;"><i>Meloboris hygrobia</i> Thomson, 1887</p><p style="margin-left: 40px;"><i>ischnocerum</i> (Thomson, 1887, <i>Meloboris</i>)</p><p style="margin-left: 40px;"><i>pechlaneri</i> (Hedwig, 1957, <i>Angitia</i>)</p>							England, Scotland, Wales, Ireland
300398	Animalia		Arthropoda			Insecta			Hymenoptera			Ichneumonoidea	Ichneumonidae	CAMPOPLEGINAE			Diadegma		incompletum				Horstmann, 1973								Scotland		NMS, det. Horstmann, added here
300399	Animalia		Arthropoda			Insecta			Hymenoptera			Ichneumonoidea	Ichneumonidae	CAMPOPLEGINAE			Diadegma		insectator				(Schrank, 1781)	<p style="margin-left: 40px;"><i>Ichneumon insectator</i> Schrank, 1781</p><p style="margin-left: 40px;"><i>insectatrix</i> (Schulz, 1906, <i>Angitia</i>)</p>							England, Ireland
300400	Animalia		Arthropoda			Insecta			Hymenoptera			Ichneumonoidea	Ichneumonidae	CAMPOPLEGINAE			Diadegma		?kyffhusanae				Horstmann, 1973								England		Tentative identification.
300401	Animalia		Arthropoda			Insecta			Hymenoptera			Ichneumonoidea	Ichneumonidae	CAMPOPLEGINAE			Diadegma		laricinellum				(Strobl, 1904)	<p style="margin-left: 40px;"><i>Angitia laricinella</i> Strobl, 1904</p>							Scotland		added by Shaw &amp; Horstmann (1997)
300402	Animalia		Arthropoda			Insecta			Hymenoptera			Ichneumonoidea	Ichneumonidae	CAMPOPLEGINAE			Diadegma		?laterale				(Gravenhorst, 1829)	<p style="margin-left: 40px;"><i>Campoplex lateralis</i> Gravenhorst, 1829</p>							England, Ireland		There is one specimen labelled as ‘?lateralis’ by K. Horstmann in NMS, from the Isle of Coll. and specimens in NMI det. A.W. Stelfox (O’Connor et al., 2007).
300403	Animalia		Arthropoda			Insecta			Hymenoptera			Ichneumonoidea	Ichneumonidae	CAMPOPLEGINAE			Diadegma		latungulum				(Thomson, 1887)	<p style="margin-left: 40px;"><i>Angitia latungula</i> Thomson, 1887</p><p style="margin-left: 40px;"><i>deletum</i> (Morley, 1915, <i>Pectinella</i>)</p>							England, Scotland, Wales, Ireland
300404	Animalia		Arthropoda			Insecta			Hymenoptera			Ichneumonoidea	Ichneumonidae	CAMPOPLEGINAE			Diadegma		ledicola				Horstmann, 1969								England, Wales		added by Shaw &amp; Horstmann (1997)
300405	Animalia		Arthropoda			Insecta			Hymenoptera			Ichneumonoidea	Ichneumonidae	CAMPOPLEGINAE			Diadegma		lithocolletis				Horstmann, 1969								England, Scotland		added by Shaw &amp; Horstmann (1997)
300406	Animalia		Arthropoda			Insecta			Hymenoptera			Ichneumonoidea	Ichneumonidae	CAMPOPLEGINAE			Diadegma		litorale				(Holmgren, 1856)	<p style="margin-left: 40px;"><i>Campoplex litoralis</i> Holmgren, 1856</p>							England, Ireland
300407	Animalia		Arthropoda			Insecta			Hymenoptera			Ichneumonoidea	Ichneumonidae	CAMPOPLEGINAE			Diadegma		majale				(Gravenhorst, 1829)	<p style="margin-left: 40px;"><i>Campoplex majalis</i> Gravenhorst, 1829</p>							England, Scotland, Ireland
300408	Animalia		Arthropoda			Insecta			Hymenoptera			Ichneumonoidea	Ichneumonidae	CAMPOPLEGINAE			Diadegma		melanium				(Thomson, 1887)	<p style="margin-left: 40px;"><i>Angitia melania</i> Thomson, 1887</p>							England
300409	Animalia		Arthropoda			Insecta			Hymenoptera			Ichneumonoidea	Ichneumonidae	CAMPOPLEGINAE			Diadegma		monospilum				(Thomson, 1887)	<p style="margin-left: 40px;"><i>Angitia monospila</i> Thomson, 1887</p>							England, Scotland, Wales		NMS, det. Horstmann, added here
300410	Animalia		Arthropoda			Insecta			Hymenoptera			Ichneumonoidea	Ichneumonidae	CAMPOPLEGINAE			Diadegma		nanus				(Gravenhorst, 1829)	<p style="margin-left: 40px;"><i>Campoplex nanus</i> Gravenhorst, 1829</p>							England, Scotland
300411	Animalia		Arthropoda			Insecta			Hymenoptera			Ichneumonoidea	Ichneumonidae	CAMPOPLEGINAE			Diadegma		naryciae				Horstmann, 2008	<p style="margin-left: 40px;"><i>narcyiae</i> misspelling</p>							England, Scotland		NMS, det. Horstmann, added here; originally, incorrectly, spelt narcyiae, emended by Horstmann (2012b).
300412	Animalia		Arthropoda			Insecta			Hymenoptera			Ichneumonoidea	Ichneumonidae	CAMPOPLEGINAE			Diadegma		neocerophagum				Horstmann, 1969	<p style="margin-left: 40px;"><i>cerophaga</i> misident.</p>
300413	Animalia		Arthropoda			Insecta			Hymenoptera			Ichneumonoidea	Ichneumonidae	CAMPOPLEGINAE			Diadegma		neomajale				Horstmann, 1969								England		NHM, det. Horstmann, added here
300414	Animalia		Arthropoda			Insecta			Hymenoptera			Ichneumonoidea	Ichneumonidae	CAMPOPLEGINAE			Diadegma		pusio				(Holmgren, 1860)	<p style="margin-left: 40px;"><i>Meloboris pusio</i> Holmgren, 1860</p><p style="margin-left: 40px;"><i>annulipes</i> (Bridgman, 1889, <i>Limneria</i>)</p>							England, Scotland
300415	Animalia		Arthropoda			Insecta			Hymenoptera			Ichneumonoidea	Ichneumonidae	CAMPOPLEGINAE			Diadegma		rufatum				(Bridgman, 1884)	<p style="margin-left: 40px;"><i>Limneria rufata</i> Bridgman, 1884</p>							England, Scotland
300416	Animalia		Arthropoda			Insecta			Hymenoptera			Ichneumonoidea	Ichneumonidae	CAMPOPLEGINAE			Diadegma		ruficeps				(Holmgren, 1860)	<p style="margin-left: 40px;"><i>Limneria ruficeps</i> Holmgren, 1860</p><p style="margin-left: 40px;"><i>gracile</i> (Ratzeburg, 1848, <i>Campoplex</i>)</p><p style="margin-left: 40px;"><i>rimator</i> (Thomson, 1887, <i>Angitia</i>)</p><p style="margin-left: 40px;"><i>rimatrix</i> (Schulz, 1906, <i>Angitia</i>)</p>							England, Scotland		NHM, NMS, det. Horstmann, added here; there is also a specimen in NMS, from Co. Clare, Ireland, labelled ?ruficeps by K. Horstmann.
300417	Animalia		Arthropoda			Insecta			Hymenoptera			Ichneumonoidea	Ichneumonidae	CAMPOPLEGINAE			Diadegma		scotiae				(Bridgman, 1889)	<p style="margin-left: 40px;"><i>Limneria scotiae</i> Bridgman, 1889</p>							Scotland
300418	Animalia		Arthropoda			Insecta			Hymenoptera			Ichneumonoidea	Ichneumonidae	CAMPOPLEGINAE			Diadegma		semiclausum				(Hellén, 1949)	<p style="margin-left: 40px;"><i>Limneria semiclausa</i> Hellén, 1949</p><p style="margin-left: 40px;"><i>tibialis</i> misident.</p><p style="margin-left: 40px;"><i>cerophaga</i> misident.</p><p style="margin-left: 40px;"><i>eucerophagum</i> Horstmann, 1969</p>							England, Scotland, Ireland, Isle of Man		distribution data from Azidah et al. (2000)
300419	Animalia		Arthropoda			Insecta			Hymenoptera			Ichneumonoidea	Ichneumonidae	CAMPOPLEGINAE			Diadegma		sordipes				(Thomson, 1887)	<p style="margin-left: 40px;"><i>Angitia sordipes</i> Thomson, 1887</p>							England, Scotland, Wales
300420	Animalia		Arthropoda			Insecta			Hymenoptera			Ichneumonoidea	Ichneumonidae	CAMPOPLEGINAE			Diadegma		stagnale				(Holmgren, 1856)	<p style="margin-left: 40px;"><i>Campoplex stagnalis</i> Holmgren, 1856</p>							England, Ireland
300421	Animalia		Arthropoda			Insecta			Hymenoptera			Ichneumonoidea	Ichneumonidae	CAMPOPLEGINAE			Diadegma		stigmatellae				Horstmann, 1980								England, Scotland		added by Horstmann (1980)
300422	Animalia		Arthropoda			Insecta			Hymenoptera			Ichneumonoidea	Ichneumonidae	CAMPOPLEGINAE			Diadegma		tenuipes				(Thomson, 1887)	<p style="margin-left: 40px;"><i>Angitia tenuipes</i> Thomson, 1887</p>							England, Scotland, Ireland
300423	Animalia		Arthropoda			Insecta			Hymenoptera			Ichneumonoidea	Ichneumonidae	CAMPOPLEGINAE			Diadegma		tripunctatum				(Bridgman, 1886)	<p style="margin-left: 40px;"><i>Limneria tripunctata</i> Bridgman, 1886</p>							England, Ireland
300424	Animalia		Arthropoda			Insecta			Hymenoptera			Ichneumonoidea	Ichneumonidae	CAMPOPLEGINAE			Diadegma		trochanteratum				(Thomson, 1887)	<p style="margin-left: 40px;"><i>Angitia trochanterata</i> Thomson, 1887</p>							England, Ireland
300425	Animalia		Arthropoda			Insecta			Hymenoptera			Ichneumonoidea	Ichneumonidae	CAMPOPLEGINAE			Diadegma		truncatum				(Thomson, 1887)	<p style="margin-left: 40px;"><i>Campoplex truncata</i> Thomson, 1887</p><p style="margin-left: 40px;"><i>subbuccatum</i> (Thomson, 1887, <i>Angitia</i>)</p>							England, Wales, Ireland
300426	Animalia		Arthropoda			Insecta			Hymenoptera			Ichneumonoidea	Ichneumonidae	CAMPOPLEGINAE			Dolophron						Förster, 1869
300427	Animalia		Arthropoda			Insecta			Hymenoptera			Ichneumonoidea	Ichneumonidae	CAMPOPLEGINAE			Dolophron		pedellum				(Holmgren, 1860)	<p style="margin-left: 40px;"><i>Limneria pedella</i> Holmgren, 1860</p><p style="margin-left: 40px;"><i>albicoxis</i> (Schmiedeknecht, 1909, <i>Synetaeris</i>)</p>							England, Scotland, Isle of Man
300428	Animalia		Arthropoda			Insecta			Hymenoptera			Ichneumonoidea	Ichneumonidae	CAMPOPLEGINAE			Dusona						Cameron, 1901	<p style="margin-left: 40px;"><i>DELOPIA</i> Cameron, 1903</p>									Most distribution data from Horstmann (2011b), based on R. Hinz’s and K. Horstmann’s identifications of specimens in NMS and NHM; older determinations of material in NHM cannot be relied upon. Some species have been carried over from the 1978 checklist but no recent specimens have been seen, these are indicated by a ‘?’. Species of Dusona excluded from the British and Irish list: [limnobia (Thoms…
300429	Animalia		Arthropoda			Insecta			Hymenoptera			Ichneumonoidea	Ichneumonidae	CAMPOPLEGINAE			Dusona		admontina				(Speiser, 1908)	<p style="margin-left: 40px;"><i>Campoplex admontinus</i> Speiser, 1908</p><p style="margin-left: 40px;"><i>rufiventris</i> (Strobl, 1904, <i>Campoplex</i>)</p>							England, Scotland		added by Horstmann (2011b)
300430	Animalia		Arthropoda			Insecta			Hymenoptera			Ichneumonoidea	Ichneumonidae	CAMPOPLEGINAE			Dusona		aemula				(Förster, 1868)	<p style="margin-left: 40px;"><i>Campoplex aemulus</i> Förster, 1868</p><p style="margin-left: 40px;"><i>discrepans</i> (Förster, 1868, <i>Campoplex</i>)</p><p style="margin-left: 40px;"><i>dissepta</i> (Förster, 1868, <i>Campoplex</i>)</p><p style="margin-left: 40px;"><i>parvula</i> (Förster, 1868, <i>Campoplex</i>)</p><p style="margin-left: 40px;"><i>filicornis</i> (Holmgren, 1872, <i>Campoplex…							England, Scotland, Wales		added by Horstmann (2011b)
300431	Animalia		Arthropoda			Insecta			Hymenoptera			Ichneumonoidea	Ichneumonidae	CAMPOPLEGINAE			Dusona		?alpigena				Hinz, 1972								Scotland		Tentative identification of a specimen in NMS by K. Horstmann.
300432	Animalia		Arthropoda			Insecta			Hymenoptera			Ichneumonoidea	Ichneumonidae	CAMPOPLEGINAE			Dusona		anceps				(Holmgren, 1860)	<p style="margin-left: 40px;"><i>Campoplex anceps</i> Holmgren, 1860</p><p style="margin-left: 40px;"><i>auriculata</i> (Förster, 1868, <i>Campoplex</i>)</p><p style="margin-left: 40px;"><i>disparilis</i> (Förster, 1868, <i>Campoplex</i>)</p><p style="margin-left: 40px;"><i>costulata</i> (Bridgman &amp; Fitch, 1885, <i>Campoplex</i>)</p><p style="margin-left: 40px;"><i>costulata</i> (Bridgman, 18…							England
300433	Animalia		Arthropoda			Insecta			Hymenoptera			Ichneumonoidea	Ichneumonidae	CAMPOPLEGINAE			Dusona		angustata				(Thomson, 1887)	<p style="margin-left: 40px;"><i>Campoplex angustatus</i> Thomson, 1887</p>							England, Scotland
300434	Animalia		Arthropoda			Insecta			Hymenoptera			Ichneumonoidea	Ichneumonidae	CAMPOPLEGINAE			Dusona		angustifrons				(Förster, 1868)	<p style="margin-left: 40px;"><i>Campoplex angustifrons</i> Förster, 1868</p><p style="margin-left: 40px;"><i>?obreptans</i> (Förster, 1868, <i>Campoplex</i>)</p><p style="margin-left: 40px;"><i>zonella</i> (Förster, 1868, <i>Campoplex</i>)</p><p style="margin-left: 40px;"><i>cornella</i> (Teunissen, 1947, <i>Campoplex</i>)</p>							England, Scotland, Wales
300435	Animalia		Arthropoda			Insecta			Hymenoptera			Ichneumonoidea	Ichneumonidae	CAMPOPLEGINAE			Dusona		annexa				(Förster, 1868)	<p style="margin-left: 40px;"><i>Campoplex annexus</i> Förster, 1868</p><p style="margin-left: 40px;"><i>limnobia</i> (Thomson, 1887, <i>Campoplex</i>)</p><p style="margin-left: 40px;"><i>facialis</i> (Holmgren, 1872, <i>Campoplex</i>)</p><p style="margin-left: 40px;"><i>americana</i> (Ashmead, 1890, <i>Casinaria</i>)</p><p style="margin-left: 40px;"><i>mariae</i> (Dalla Torre, 1901, <i>Campoplex…							England, Scotland, Ireland, Isle of Man
300436	Animalia		Arthropoda			Insecta			Hymenoptera			Ichneumonoidea	Ichneumonidae	CAMPOPLEGINAE			Dusona		aurita				(Kriechbaumer, 1883)	<p style="margin-left: 40px;"><i>Campoplex auritus</i> Kriechbaumer, 1883</p>							England		added by Horstmann (2011b)
300437	Animalia		Arthropoda			Insecta			Hymenoptera			Ichneumonoidea	Ichneumonidae	CAMPOPLEGINAE			Dusona		aversa				(Förster, 1868)	<p style="margin-left: 40px;"><i>Campoplex aversus</i> Förster, 1868</p><p style="margin-left: 40px;"><i>dubiosa</i> (Förster, 1868, <i>Campoplex</i>)</p><p style="margin-left: 40px;"><i>tschekii</i> (Holmgren, 1872, <i>Campoplex</i>)</p><p style="margin-left: 40px;"><i>crassipes</i> (Thomson, 1887, <i>Campoplex</i>)</p>							England, Scotland
300438	Animalia		Arthropoda			Insecta			Hymenoptera			Ichneumonoidea	Ichneumonidae	CAMPOPLEGINAE			Dusona		bellipes				(Holmgren, 1872)	<p style="margin-left: 40px;"><i>Campoplex bellipes</i> Holmgren, 1872</p><p style="margin-left: 40px;"><i>vernalis</i> Hinz, 1957</p>							England		added by Horstmann (2011b)
300439	Animalia		Arthropoda			Insecta			Hymenoptera			Ichneumonoidea	Ichneumonidae	CAMPOPLEGINAE			Dusona		bicoloripes				(Ashmead, 1906)	<p style="margin-left: 40px;"><i>Campoplex bicoloripes</i> Ashmead, 1906</p><p style="margin-left: 40px;"><i>pugillator</i> misident.</p><p style="margin-left: 40px;"><i>foersteri</i> (Roman, 1942, <i>Campoplex</i>)</p>							England, Scotland
300440	Animalia		Arthropoda			Insecta			Hymenoptera			Ichneumonoidea	Ichneumonidae	CAMPOPLEGINAE			Dusona		blanda				(Förster, 1868)	<p style="margin-left: 40px;"><i>Campoplex blandus</i> Förster, 1868</p><p style="margin-left: 40px;"><i>remota</i> (Förster, 1868, <i>Campoplex</i>)</p><p style="margin-left: 40px;"><i>forsselli</i> (Holmgren, 1872, <i>Campoplex</i>)</p><p style="margin-left: 40px;"><i>punctiventris</i> (Woldstedt, 1877, <i>Casinaria</i>)</p>							England, Scotland, Isle of Man
300441	Animalia		Arthropoda			Insecta			Hymenoptera			Ichneumonoidea	Ichneumonidae	CAMPOPLEGINAE			Dusona		bucculenta				(Holmgren, 1860)	<p style="margin-left: 40px;"><i>Campoplex bucculentus</i> Holmgren, 1860</p><p style="margin-left: 40px;"><i>melampus</i> (Förster, 1868, <i>Campoplex</i>)</p>							England, Scotland
300442	Animalia		Arthropoda			Insecta			Hymenoptera			Ichneumonoidea	Ichneumonidae	CAMPOPLEGINAE			Dusona		carinifrons				(Holmgren, 1860)	<p style="margin-left: 40px;"><i>Campoplex carinifrons</i> Holmgren, 1860</p><p style="margin-left: 40px;"><i>minax</i> (Förster, 1868, <i>Campoplex</i>)</p><p style="margin-left: 40px;"><i>geometrae</i> (Rudow, 1883, <i>Campoplex</i>)</p>							England
300443	Animalia		Arthropoda			Insecta			Hymenoptera			Ichneumonoidea	Ichneumonidae	CAMPOPLEGINAE			Dusona		carpathica				(Szépligeti, 1916)	<p style="margin-left: 40px;"><i>Casinaria carpathica</i> Szépligeti, 1916</p><p style="margin-left: 40px;"><i>zonella</i> misident.</p><p style="margin-left: 40px;"><i>adriaansei</i> (Teunissen, 1947, <i>Campoplex</i>)</p>							England, Scotland		added by Horstmann (2011b)
300444	Animalia		Arthropoda			Insecta			Hymenoptera			Ichneumonoidea	Ichneumonidae	CAMPOPLEGINAE			Dusona		circumcinctus				(Förster, 1868)	<p style="margin-left: 40px;"><i>Campoplex circumcinctus</i> Förster, 1868</p><p style="margin-left: 40px;"><i>subcinctus</i> (Förster, 1868, <i>Campoplex</i>)</p>							England		added by Horstmann (2011b)
300445	Animalia		Arthropoda			Insecta			Hymenoptera			Ichneumonoidea	Ichneumonidae	CAMPOPLEGINAE			Dusona		circumspectans				(Förster, 1868)	<p style="margin-left: 40px;"><i>Campoplex circumspectans</i> Förster, 1868</p><p style="margin-left: 40px;"><i>vagula</i> (Förster, 1868, <i>Campoplex</i>)</p><p style="margin-left: 40px;"><i>subsulcata</i> (Holmgren, 1872, <i>Campoplex</i>)</p>							England, Scotland		added by Horstmann (2011b)
300446	Animalia		Arthropoda			Insecta			Hymenoptera			Ichneumonoidea	Ichneumonidae	CAMPOPLEGINAE			Dusona		confusa				(Förster, 1868)	<p style="margin-left: 40px;"><i>Campoplex confusus</i> Förster, 1868</p><p style="margin-left: 40px;"><i>lacunosa</i> (Kriechbaumer, 1883, <i>Campoplex</i>)</p><p style="margin-left: 40px;"><i>consimilis</i> (Schmiedeknecht, 1908, <i>Campoplex</i>)</p>							England, Scotland, Wales, Isle of Man
300447	Animalia		Arthropoda			Insecta			Hymenoptera			Ichneumonoidea	Ichneumonidae	CAMPOPLEGINAE			Dusona		cultrator				(Gravenhorst, 1829)	<p style="margin-left: 40px;"><i>Campoplex cultrator</i> Gravenhorst, 1829</p>							England
300448	Animalia		Arthropoda			Insecta			Hymenoptera			Ichneumonoidea	Ichneumonidae	CAMPOPLEGINAE			Dusona		disclusa				(Förster, 1868)	<p style="margin-left: 40px;"><i>Campoplex disclusus</i> Förster, 1868</p>							England, Scotland		added by Horstmann (2011b)
300449	Animalia		Arthropoda			Insecta			Hymenoptera			Ichneumonoidea	Ichneumonidae	CAMPOPLEGINAE			Dusona		dubitor				Hinz, 1977	<p style="margin-left: 40px;"><i>oxyacanthae</i> misident.</p>							England, Scotland		added by Horstmann (2011b)
300450	Animalia		Arthropoda			Insecta			Hymenoptera			Ichneumonoidea	Ichneumonidae	CAMPOPLEGINAE			Dusona		erythrogaster				(Förster, 1868)	<p style="margin-left: 40px;"><i>Campoplex erythrogaster</i> Förster, 1868</p><p style="margin-left: 40px;"><i>indefessa</i> (Förster, 1868, <i>Campoplex</i>)</p>							England, Scotland
300451	Animalia		Arthropoda			Insecta			Hymenoptera			Ichneumonoidea	Ichneumonidae	CAMPOPLEGINAE			Dusona		falcator				(Fabricius, 1775)	<p style="margin-left: 40px;"><i>Ichneumon falcator</i> Fabricius, 1775</p>							England
300452	Animalia		Arthropoda			Insecta			Hymenoptera			Ichneumonoidea	Ichneumonidae	CAMPOPLEGINAE			Dusona		flagellator				(Fabricius, 1793)	<p style="margin-left: 40px;"><i>Ichneumon flagellator</i> Fabricius, 1793</p><p style="margin-left: 40px;"><i>debilis</i> (Förster, 1868, <i>Campoplex</i>)</p><p style="margin-left: 40px;"><i>heterocera</i> (Förster, 1868, <i>Campoplex</i>)</p>							England		added by Horstmann (2011b)
300453	Animalia		Arthropoda			Insecta			Hymenoptera			Ichneumonoidea	Ichneumonidae	CAMPOPLEGINAE			Dusona		?holmgrenii				(Dalla Torre, 1901)	<p style="margin-left: 40px;"><i>Campoplex ?holmgrenii</i> Dalla Torre, 1901</p><p style="margin-left: 40px;"><i>unicincta</i> (Holmgren, 1872, <i>Campoplex</i>)</p>
300454	Animalia		Arthropoda			Insecta			Hymenoptera			Ichneumonoidea	Ichneumonidae	CAMPOPLEGINAE			Dusona		humilis				(Förster, 1868)	<p style="margin-left: 40px;"><i>Campoplex humilis</i> Förster, 1868</p><p style="margin-left: 40px;"><i>eurynotus</i> (Holmgren, 1872, <i>Campoplex</i>)</p>							England, Scotland		added by Horstmann (2011b)
300455	Animalia		Arthropoda			Insecta			Hymenoptera			Ichneumonoidea	Ichneumonidae	CAMPOPLEGINAE			Dusona		incompleta				(Bridgman, 1889)	<p style="margin-left: 40px;"><i>Campoplex incompletus</i> Bridgman, 1889</p>							England, Scotland
300456	Animalia		Arthropoda			Insecta			Hymenoptera			Ichneumonoidea	Ichneumonidae	CAMPOPLEGINAE			Dusona		inermis				(Förster, 1868)	<p style="margin-left: 40px;"><i>Campoplex inermis</i> Förster, 1868</p>							England, Scotland		added by Horstmann (2011b)
300457	Animalia		Arthropoda			Insecta			Hymenoptera			Ichneumonoidea	Ichneumonidae	CAMPOPLEGINAE			Dusona		infesta				(Förster, 1868)	<p style="margin-left: 40px;"><i>Campoplex infestus</i> Förster, 1868</p><p style="margin-left: 40px;"><i>terrifica</i> (Förster, 1868, <i>Campoplex</i>)</p>							Scotland, Wales
300458	Animalia		Arthropoda			Insecta			Hymenoptera			Ichneumonoidea	Ichneumonidae	CAMPOPLEGINAE			Dusona		insignita				(Förster, 1868)	<p style="margin-left: 40px;"><i>Campoplex insignitus</i> Förster, 1868</p><p style="margin-left: 40px;"><i>bistrigosa</i> (Holmgren, 1872, <i>Campoplex</i>)</p>							England, Scotland
300459	Animalia		Arthropoda			Insecta			Hymenoptera			Ichneumonoidea	Ichneumonidae	CAMPOPLEGINAE			Dusona		juvenilis				(Förster, 1868)	<p style="margin-left: 40px;"><i>Campoplex juvenilis</i> Förster, 1868</p><p style="margin-left: 40px;"><i>victor</i> (Thunberg, 1824, <i>Ichneumon</i>)</p><p style="margin-left: 40px;"><i>monozona</i> (Förster, 1868, <i>Campoplex</i>)</p>							England, Wales
300460	Animalia		Arthropoda			Insecta			Hymenoptera			Ichneumonoidea	Ichneumonidae	CAMPOPLEGINAE			Dusona		leptogaster				(Holmgren, 1860)	<p style="margin-left: 40px;"><i>Campoplex leptogaster</i> Holmgren, 1860</p><p style="margin-left: 40px;"><i>macrostylus</i> (Förster, 1868, <i>Campoplex</i>)</p><p style="margin-left: 40px;"><i>sylvicola</i> (Habermehl, 1922, <i>Campoplex</i>)</p>							England, Scotland
300461	Animalia		Arthropoda			Insecta			Hymenoptera			Ichneumonoidea	Ichneumonidae	CAMPOPLEGINAE			Dusona		libertatis				(Teunissen, 1947)	<p style="margin-left: 40px;"><i>Campoplex libertatis</i> Teunissen, 1947</p>							England		added by Horstmann (2011b)
300462	Animalia		Arthropoda			Insecta			Hymenoptera			Ichneumonoidea	Ichneumonidae	CAMPOPLEGINAE			Dusona		mercator				(Fabricius, 1793)	<p style="margin-left: 40px;"><i>Ichneumon mercator</i> Fabricius, 1793</p><p style="margin-left: 40px;"><i>venditor</i> (Thunberg, 1824, <i>Ichneumon</i>)</p><p style="margin-left: 40px;"><i>oxyacanthae</i> (Boie, 1855, <i></i>)</p><p style="margin-left: 40px;"><i>mesoxantha</i> (Förster, 1868, <i>Campoplex</i>)</p>							England, Scotland
300463	Animalia		Arthropoda			Insecta			Hymenoptera			Ichneumonoidea	Ichneumonidae	CAMPOPLEGINAE			Dusona		minor				(Provancher, 1879)	<p style="margin-left: 40px;"><i>Campoplex minor</i> Provancher, 1879</p>							England		added by Horstmann (2011b)
300464	Animalia		Arthropoda			Insecta			Hymenoptera			Ichneumonoidea	Ichneumonidae	CAMPOPLEGINAE			Dusona		montana				(Roman, 1929)	<p style="margin-left: 40px;"><i>Campoplex montanus</i> Roman, 1929</p><p style="margin-left: 40px;"><i>carinifer</i> (Teunissen, 1947, <i>Campoplex</i>)</p>							England		added by Horstmann (2011b)
300465	Animalia		Arthropoda			Insecta			Hymenoptera			Ichneumonoidea	Ichneumonidae	CAMPOPLEGINAE			Dusona		myrtilla				(Desvignes, 1856)	<p style="margin-left: 40px;"><i>Campoplex myrtillus</i> Desvignes, 1856</p><p style="margin-left: 40px;"><i>tenthredinum</i> (Tschek, 1871, <i>Campoplex</i>)</p><p style="margin-left: 40px;"><i>nobilitata</i> (Holmgren, 1872, <i>Campoplex</i>)</p>							England
300466	Animalia		Arthropoda			Insecta			Hymenoptera			Ichneumonoidea	Ichneumonidae	CAMPOPLEGINAE			Dusona		nidulator				(Fabricius, 1804)	<p style="margin-left: 40px;"><i>Ophion nidulator</i> Fabricius, 1804</p><p style="margin-left: 40px;"><i>nitidulator</i> (Holmgren, 1856, <i>Campoplex</i>)</p><p style="margin-left: 40px;"><i>circumscripta</i> (Förster, 1868, <i>Campoplex</i>)</p><p style="margin-left: 40px;"><i>martialis</i> (Förster, 1868, <i>Campoplex</i>)</p><p style="margin-left: 40px;"><i>vindex</i> (Förster, 1868, <i>Camp…							England, Scotland
300467	Animalia		Arthropoda			Insecta			Hymenoptera			Ichneumonoidea	Ichneumonidae	CAMPOPLEGINAE			Dusona		notabilis				(Förster, 1868)	<p style="margin-left: 40px;"><i>Campoplex notabilis</i> Förster, 1868</p><p style="margin-left: 40px;"><i>scolator</i> misident.</p>							England, Scotland
300468	Animalia		Arthropoda			Insecta			Hymenoptera			Ichneumonoidea	Ichneumonidae	CAMPOPLEGINAE			Dusona		obliterata				(Holmgren, 1872)	<p style="margin-left: 40px;"><i>Campoplex obliteratus</i> Holmgren, 1872</p><p style="margin-left: 40px;"><i>limniventris</i> (Kriechbaumer, 1883, <i>Campoplex</i>)</p>							England		added by Horstmann (2011b)
300469	Animalia		Arthropoda			Insecta			Hymenoptera			Ichneumonoidea	Ichneumonidae	CAMPOPLEGINAE			Dusona		?opaca				(Thomson, 1887)	<p style="margin-left: 40px;"><i>Campoplex opacus</i> Thomson, 1887</p>
300470	Animalia		Arthropoda			Insecta			Hymenoptera			Ichneumonoidea	Ichneumonidae	CAMPOPLEGINAE			Dusona		petiolator				(Fabricius, 1804)	<p style="margin-left: 40px;"><i>Ophion petiolator</i> Fabricius, 1804</p><p style="margin-left: 40px;"><i>lapponica</i> (Holmgren, 1860, <i>Campoplex</i>)</p><p style="margin-left: 40px;"><i>callizona</i> (Förster, 1868, <i>Campoplex</i>)</p><p style="margin-left: 40px;"><i>punctata</i> (Bridgman &amp; Fitch, 1885, <i>Campoplex</i>)</p><p style="margin-left: 40px;"><i>punctata</i> (Bridgman, 188…							England, Scotland
300471	Animalia		Arthropoda			Insecta			Hymenoptera			Ichneumonoidea	Ichneumonidae	CAMPOPLEGINAE			Dusona		pineticola				(Holmgren, 1872)	<p style="margin-left: 40px;"><i>Campoplex pineticola</i> Holmgren, 1872</p><p style="margin-left: 40px;"><i>litigiosa</i> (Habermehl, 1922, <i>Campoplex</i>)</p><p style="margin-left: 40px;"><i>sibirica</i> Hinz, 1985</p>							England, Scotland		added by Horstmann (2011b)
300472	Animalia		Arthropoda			Insecta			Hymenoptera			Ichneumonoidea	Ichneumonidae	CAMPOPLEGINAE			Dusona		polita				(Förster, 1868)	<p style="margin-left: 40px;"><i>Campoplex politus</i> Förster, 1868</p><p style="margin-left: 40px;"><i>flavipalpis</i> (Förster, 1868, <i>Campoplex</i>)</p><p style="margin-left: 40px;"><i>mediana</i> (Förster, 1868, <i>Campoplex</i>)</p><p style="margin-left: 40px;"><i>spoliator</i> (Förster, 1868, <i>Campoplex</i>)</p><p style="margin-left: 40px;"><i>trisculpta</i> (Holmgren, 1872, <i>Campopl…							England, Scotland
300473	Animalia		Arthropoda			Insecta			Hymenoptera			Ichneumonoidea	Ichneumonidae	CAMPOPLEGINAE			Dusona		prominula				(Förster, 1868)	<p style="margin-left: 40px;"><i>Campoplex prominulus</i> Förster, 1868</p><p style="margin-left: 40px;"><i>contumax</i> (Förster, 1868, <i>Campoplex</i>)</p><p style="margin-left: 40px;"><i>foveolata</i> (Förster, 1868, <i>Campoplex</i>)</p>							England, Scotland
300474	Animalia		Arthropoda			Insecta			Hymenoptera			Ichneumonoidea	Ichneumonidae	CAMPOPLEGINAE			Dusona		pugillator				(Linnaeus, 1758)	<p style="margin-left: 40px;"><i>Ichneumon pugillator</i> Linnaeus, 1758</p><p style="margin-left: 40px;"><i>canaliculata</i> (Förster, 1868, <i>Campoplex</i>)</p>							England, Scotland
300475	Animalia		Arthropoda			Insecta			Hymenoptera			Ichneumonoidea	Ichneumonidae	CAMPOPLEGINAE			Dusona		pulchripes				(Holmgren, 1872)	<p style="margin-left: 40px;"><i>Campoplex pulchripes</i> Holmgren, 1872</p><p style="margin-left: 40px;"><i>praecox</i> (Teunissen, 1947, <i>Campoplex</i>)</p>							England, Ireland		added by Horstmann (2011b)
300476	Animalia		Arthropoda			Insecta			Hymenoptera			Ichneumonoidea	Ichneumonidae	CAMPOPLEGINAE			Dusona		recta				(Thomson, 1887)	<p style="margin-left: 40px;"><i>Campoplex rectus</i> Thomson, 1887</p>							England		added by Horstmann (2011b)
300477	Animalia		Arthropoda			Insecta			Hymenoptera			Ichneumonoidea	Ichneumonidae	CAMPOPLEGINAE			Dusona		rubidatae				Horstmann, 2009								Scotland		added by Horstmann (2011b)
300478	Animalia		Arthropoda			Insecta			Hymenoptera			Ichneumonoidea	Ichneumonidae	CAMPOPLEGINAE			Dusona		rugifer				(Förster, 1868)	<p style="margin-left: 40px;"><i>Campoplex rugifer</i> Förster, 1868</p><p style="margin-left: 40px;"><i>subaequalis</i> (Förster, 1868, <i>Campoplex</i>)</p><p style="margin-left: 40px;"><i>puncta</i> (Kriechbaumer, 1883, <i>Campoplex</i>)</p>							England, Scotland		English record from W.A. Ely (pers. comm.).
300479	Animalia		Arthropoda			Insecta			Hymenoptera			Ichneumonoidea	Ichneumonidae	CAMPOPLEGINAE			Dusona		?rugulosa				(Förster, 1868)	<p style="margin-left: 40px;"><i>Campoplex rugulosus</i> Förster, 1868</p>
300480	Animalia		Arthropoda			Insecta			Hymenoptera			Ichneumonoidea	Ichneumonidae	CAMPOPLEGINAE			Dusona		semiflava				(Costa, 1883)	<p style="margin-left: 40px;"><i>Campoplex semiflavus</i> Costa, 1883</p><p style="margin-left: 40px;"><i>flaviscapus</i> (Thomson, 1887, <i>Campoplex</i>)</p>							England		added by Horstmann (2011b)
300481	Animalia		Arthropoda			Insecta			Hymenoptera			Ichneumonoidea	Ichneumonidae	CAMPOPLEGINAE			Dusona		sobolicida				(Förster, 1868)	<p style="margin-left: 40px;"><i>Campoplex sobolicida</i> Förster, 1868</p><p style="margin-left: 40px;"><i>ulcerata</i> (Holmgren, 1872, <i>Campoplex</i>)</p>							England, Scotland, Wales
300482	Animalia		Arthropoda			Insecta			Hymenoptera			Ichneumonoidea	Ichneumonidae	CAMPOPLEGINAE			Dusona		spinipes				(Thomson, 1887)	<p style="margin-left: 40px;"><i>Campoplex spinipes</i> Thomson, 1887</p>							England		added by Horstmann (2011b)
300483	Animalia		Arthropoda			Insecta			Hymenoptera			Ichneumonoidea	Ichneumonidae	CAMPOPLEGINAE			Dusona		stenogaster				(Förster, 1868)	<p style="margin-left: 40px;"><i>Campoplex stenogaster</i> Förster, 1868</p><p style="margin-left: 40px;"><i>monticola</i> (Habermehl, 1922, <i>Campoplex</i>)</p>							England		added by Horstmann (2011b)
300484	Animalia		Arthropoda			Insecta			Hymenoptera			Ichneumonoidea	Ichneumonidae	CAMPOPLEGINAE			Dusona		stragifex				(Förster, 1868)	<p style="margin-left: 40px;"><i>Campoplex stragifex</i> Förster, 1868</p><p style="margin-left: 40px;"><i>delusor</i> misident.</p><p style="margin-left: 40px;"><i>adjuncta</i> (Förster, 1868, <i>Campoplex</i>)</p><p style="margin-left: 40px;"><i>areolata</i> (Brauns, 1895, <i>Campoplex</i>)</p>							England, Scotland, Isle of Man
300485	Animalia		Arthropoda			Insecta			Hymenoptera			Ichneumonoidea	Ichneumonidae	CAMPOPLEGINAE			Dusona		stygia				(Förster, 1868)	<p style="margin-left: 40px;"><i>Campoplex stygius</i> Förster, 1868</p>							England		added by Horstmann (2011b)
300486	Animalia		Arthropoda			Insecta			Hymenoptera			Ichneumonoidea	Ichneumonidae	CAMPOPLEGINAE			Dusona		subimpressa				(Förster, 1868)	<p style="margin-left: 40px;"><i>Campoplex subimpressus</i> Förster, 1868</p><p style="margin-left: 40px;"><i>transitoria</i> (Kiss, 1924, <i>Campoplex</i>)</p>							England		added by Horstmann (2011b)
300487	Animalia		Arthropoda			Insecta			Hymenoptera			Ichneumonoidea	Ichneumonidae	CAMPOPLEGINAE			Dusona		tenuis				(Förster, 1868)	<p style="margin-left: 40px;"><i>Campoplex tenuis</i> Förster, 1868</p><p style="margin-left: 40px;"><i>agnata</i> (Förster, 1868, <i>Campoplex</i>)</p><p style="margin-left: 40px;"><i>anxia</i> (Förster, 1868, <i>Campoplex</i>)</p><p style="margin-left: 40px;"><i>peraffinis</i> (Förster, 1868, <i>Campoplex</i>)</p><p style="margin-left: 40px;"><i>proxima</i> (Förster, 1868, <i>Campoplex</i>)</p>							England, Scotland
300488	Animalia		Arthropoda			Insecta			Hymenoptera			Ichneumonoidea	Ichneumonidae	CAMPOPLEGINAE			Dusona		terebrator				(Förster, 1868)	<p style="margin-left: 40px;"><i>Campoplex terebrator</i> Förster, 1868</p><p style="margin-left: 40px;"><i>added</i> by</p>							England, Scotland, Wales, Ireland, Isle of Man		added by Horstmann (2011b)
300489	Animalia		Arthropoda			Insecta			Hymenoptera			Ichneumonoidea	Ichneumonidae	CAMPOPLEGINAE			Dusona		thomsoni				Hinz, 1966								England		added by Horstmann (2011b)
300490	Animalia		Arthropoda			Insecta			Hymenoptera			Ichneumonoidea	Ichneumonidae	CAMPOPLEGINAE			Dusona		vigilator				(Förster, 1868)	<p style="margin-left: 40px;"><i>Campoplex vigilator</i> Förster, 1868</p>							England, Scotland
300491	Animalia		Arthropoda			Insecta			Hymenoptera			Ichneumonoidea	Ichneumonidae	CAMPOPLEGINAE			Dusona		xenocampta				(Förster, 1868)	<p style="margin-left: 40px;"><i>Campoplex xenocamptus</i> Förster, 1868</p><p style="margin-left: 40px;"><i>polyxantha</i> (Strobl, 1904, <i>Campoplex</i>)</p><p style="margin-left: 40px;"><i>baltica</i> (Habermehl, 1926, <i>Campoplex</i>)</p>							Scotland
300492	Animalia		Arthropoda			Insecta			Hymenoptera			Ichneumonoidea	Ichneumonidae	CAMPOPLEGINAE			Echthronomas						Förster, 1869
300493	Animalia		Arthropoda			Insecta			Hymenoptera			Ichneumonoidea	Ichneumonidae	CAMPOPLEGINAE			Echthronomas		facialis				(Thomson, 1887)	<p style="margin-left: 40px;"><i>Anilasta facialis</i> Thomson, 1887</p>							England		Horniman, det. Shaw, added here
300494	Animalia		Arthropoda			Insecta			Hymenoptera			Ichneumonoidea	Ichneumonidae	CAMPOPLEGINAE			Echthronomas		ochrostoma				(Holmgren, 1860)	<p style="margin-left: 40px;"><i>Casinaria ochrostoma</i> Holmgren, 1860</p>									NHM, added here
300495	Animalia		Arthropoda			Insecta			Hymenoptera			Ichneumonoidea	Ichneumonidae	CAMPOPLEGINAE			Echthronomas		tricincta				(Gravenhorst, 1829)	<p style="margin-left: 40px;"><i>Campoplex tricinctus</i> Gravenhorst, 1829</p>
300496	Animalia		Arthropoda			Insecta			Hymenoptera			Ichneumonoidea	Ichneumonidae	CAMPOPLEGINAE			Enytus						Cameron, 1905	<p style="margin-left: 40px;"><i>IOCTES</i> Förster, 1869</p><p style="margin-left: 40px;"><i>NAREOLATA</i> Ellinger &amp; Sachtleben, 1928</p>
300497	Animalia		Arthropoda			Insecta			Hymenoptera			Ichneumonoidea	Ichneumonidae	CAMPOPLEGINAE			Enytus		apostata				(Gravenhorst, 1829)	<p style="margin-left: 40px;"><i>Campoplex apostata</i> Gravenhorst, 1829</p><p style="margin-left: 40px;"><i>exareolata</i> (Ratzeburg, 1852, <i>Campoplex</i>)</p><p style="margin-left: 40px;"><i>reticulata</i> (Bridgman, 1884, <i>Limneria</i>)</p>							England, Scotland, Ireland		distribution data from Shaw (1981a)
300498	Animalia		Arthropoda			Insecta			Hymenoptera			Ichneumonoidea	Ichneumonidae	CAMPOPLEGINAE			Enytus		appositor				(Aubert, 1970)	<p style="margin-left: 40px;"><i>Diadegma appositor</i> Aubert, 1970</p>							England, Scotland, Wales, Isle of Man		NMS, NHM, det. Horstmann, added here
300499	Animalia		Arthropoda			Insecta			Hymenoptera			Ichneumonoidea	Ichneumonidae	CAMPOPLEGINAE			Enytus		crataegellae				(Thomson, 1887)	<p style="margin-left: 40px;"><i>Angitia crataegellae</i> Thomson, 1887</p>							England		NMS, det. Horstmann, added here
300500	Animalia		Arthropoda			Insecta			Hymenoptera			Ichneumonoidea	Ichneumonidae	CAMPOPLEGINAE			Enytus		neoapostata				(Horstmann, 1969)	<p style="margin-left: 40px;"><i>Diadegma neoapostata</i> Horstmann, 1969</p><p style="margin-left: 40px;"><i>neapostatus</i> misspelling</p>							England, Scotland, Ireland
300501	Animalia		Arthropoda			Insecta			Hymenoptera			Ichneumonoidea	Ichneumonidae	CAMPOPLEGINAE			Enytus		parvicanda				(Thomson, 1887)	<p style="margin-left: 40px;"><i>Angitia parvicanda</i> Thomson, 1887</p><p style="margin-left: 40px;"><i>parvicauda</i> misspelling</p>
300502	Animalia		Arthropoda			Insecta			Hymenoptera			Ichneumonoidea	Ichneumonidae	CAMPOPLEGINAE			Enytus		styriacus				(Horstmann, 1980)	<p style="margin-left: 40px;"><i>Diadegma styriacum</i> Horstmann, 1980</p>							Scotland		NMS, det. Horstmann, added here
300503	Animalia		Arthropoda			Insecta			Hymenoptera			Ichneumonoidea	Ichneumonidae	CAMPOPLEGINAE			Eriborus						Förster, 1869	<p style="margin-left: 40px;"><i>ZAPORUS</i> Förster, 1869</p>									Distribution data for Eriborus species from Horstmann (1987) and the collections of NHM, NMS and UM.
300504	Animalia		Arthropoda			Insecta			Hymenoptera			Ichneumonoidea	Ichneumonidae	CAMPOPLEGINAE			Eriborus		braccatus				(Gmelin, 1790)	<p style="margin-left: 40px;"><i>Ichneumon braccatus</i> Gmelin, 1790</p><p style="margin-left: 40px;"><i>jocator</i> (Fabricius, 1793, <i>Ichneumon</i>)</p><p style="margin-left: 40px;"><i>nigriventris</i> (Habermehl, 1922, <i>Anilasta</i>)</p>							England
300505	Animalia		Arthropoda			Insecta			Hymenoptera			Ichneumonoidea	Ichneumonidae	CAMPOPLEGINAE			Eriborus		dorsalis				(Gravenhorst, 1829)	<p style="margin-left: 40px;"><i>Campoplex dorsalis</i> Gravenhorst, 1829</p><p style="margin-left: 40px;"><i>micorocephalus</i> (Gravenhorst, 1829, <i>Ischnoceros</i>)</p>							England, Scotland		Listed twice by Fitton (1978), under Meloboris and Eriborus.
300506	Animalia		Arthropoda			Insecta			Hymenoptera			Ichneumonoidea	Ichneumonidae	CAMPOPLEGINAE			Eriborus		perfidus				(Gravenhorst, 1829)	<p style="margin-left: 40px;"><i>Campoplex perfidus</i> Gravenhorst, 1829</p><p style="margin-left: 40px;"><i>aberrans</i> (Gravenhorst, 1829, <i>Campoplex</i>)</p><p style="margin-left: 40px;"><i>obscuriventris</i> Kiss, 1926</p>							England
300507	Animalia		Arthropoda			Insecta			Hymenoptera			Ichneumonoidea	Ichneumonidae	CAMPOPLEGINAE			Gonotypus						Förster, 1869	<p style="margin-left: 40px;"><i>GONOTYPA</i> Thomson, 1887</p>
300508	Animalia		Arthropoda			Insecta			Hymenoptera			Ichneumonoidea	Ichneumonidae	CAMPOPLEGINAE			Gonotypus		melanostoma				(Thomson, 1887)	<p style="margin-left: 40px;"><i>Gonotypa melanostoma</i> Thomson, 1887</p>							England, Wales, Ireland, Isle of Man
300509	Animalia		Arthropoda			Insecta			Hymenoptera			Ichneumonoidea	Ichneumonidae	CAMPOPLEGINAE			Hyposoter						Förster, 1869	<p style="margin-left: 40px;"><i>AMELOCTONUS</i> Förster, 1869</p><p style="margin-left: 40px;"><i>ISCHNOSCOPUS</i> Förster, 1869</p><p style="margin-left: 40px;"><i>RHYTHMONOTUS</i> Förster, 1869</p>
300510	Animalia		Arthropoda			Insecta			Hymenoptera			Ichneumonoidea	Ichneumonidae	CAMPOPLEGINAE			Hyposoter		albonotatus				(Bridgman, 1889)	<p style="margin-left: 40px;"><i>Limneria albonotata</i> Bridgman, 1889</p><p style="margin-left: 40px;"><i>melaleucus</i> (Schmiedeknecht, 1909, <i>Anilastus</i>)</p>							England, Scotland
300511	Animalia		Arthropoda			Insecta			Hymenoptera			Ichneumonoidea	Ichneumonidae	CAMPOPLEGINAE			Hyposoter		alienus				(Brischke, 1880)	<p style="margin-left: 40px;"><i>Limneria aliena</i> Brischke, 1880</p>							Ireland
300512	Animalia		Arthropoda			Insecta			Hymenoptera			Ichneumonoidea	Ichneumonidae	CAMPOPLEGINAE			Hyposoter		anglicanus				(Habermehl, 1923)	<p style="margin-left: 40px;"><i>Anilasta anglicana</i> Habermehl, 1923</p>
300513	Animalia		Arthropoda			Insecta			Hymenoptera			Ichneumonoidea	Ichneumonidae	CAMPOPLEGINAE			Hyposoter		barrettii				(Bridgman, 1881)	<p style="margin-left: 40px;"><i>Limneria barrettii</i> Bridgman, 1881</p><p style="margin-left: 40px;"><i>teucrii</i> (Bridgman, 1889, <i>Limneria</i>)</p>							England
300514	Animalia		Arthropoda			Insecta			Hymenoptera			Ichneumonoidea	Ichneumonidae	CAMPOPLEGINAE			Hyposoter		boops				(Thomson, 1887)	<p style="margin-left: 40px;"><i>Anilasta boops</i> Thomson, 1887</p>							England		added by Horstmann (2013); raised from synonymy with brischkei by Horstmann (2013).
300515	Animalia		Arthropoda			Insecta			Hymenoptera			Ichneumonoidea	Ichneumonidae	CAMPOPLEGINAE			Hyposoter		brischkei				(Bridgman, 1882)	<p style="margin-left: 40px;"><i>Limneria brischkei</i> Bridgman, 1882</p>							England, Scotland, Ireland
300516	Animalia		Arthropoda			Insecta			Hymenoptera			Ichneumonoidea	Ichneumonidae	CAMPOPLEGINAE			Hyposoter		caedator				(Gravenhorst, 1829)	<p style="margin-left: 40px;"><i>Campoplex caedator</i> Gravenhorst, 1829</p><p style="margin-left: 40px;"><i>henscheli</i> (Smits van Burgst, 1910, <i>Anilastus</i>)</p><p style="margin-left: 40px;"><i>persimilis</i> (Szépligeti, 1916, <i>Anilastus</i>)</p><p style="margin-left: 40px;"><i>parvulus</i> (Kiss, 1926, <i>Anilastus</i>)</p>							England
300517	Animalia		Arthropoda			Insecta			Hymenoptera			Ichneumonoidea	Ichneumonidae	CAMPOPLEGINAE			Hyposoter		carbonarius				(Ratzeburg, 1844)	<p style="margin-left: 40px;"><i>Campoplex carbonaria</i> Ratzeburg, 1844</p>							England, Scotland
300518	Animalia		Arthropoda			Insecta			Hymenoptera			Ichneumonoidea	Ichneumonidae	CAMPOPLEGINAE			Hyposoter		clausus				(Brischke, 1880)	<p style="margin-left: 40px;"><i>Limneria clausa</i> Brischke, 1880</p>							England, Scotland		Many specimens in NHM are only doubtfully identified; material in NMS has been recently identified by K. Horstmann.
300519	Animalia		Arthropoda			Insecta			Hymenoptera			Ichneumonoidea	Ichneumonidae	CAMPOPLEGINAE			Hyposoter		coxator				(Thomson, 1887)	<p style="margin-left: 40px;"><i>Anilasta coxator</i> Thomson, 1887</p>							England		NHM, NMS, det. Horstmann, added here
300520	Animalia		Arthropoda			Insecta			Hymenoptera			Ichneumonoidea	Ichneumonidae	CAMPOPLEGINAE			Hyposoter		didymator				(Thunberg, 1824)	<p style="margin-left: 40px;"><i>Ichneumon didymator</i> Thunberg, 1824</p><p style="margin-left: 40px;"><i>rotundator</i> (Thunberg, 1824, <i>Ichneumon</i>)</p><p style="margin-left: 40px;"><i>ruficinctus</i> (Gravenhorst, 1829, <i>Campoplex</i>)</p><p style="margin-left: 40px;"><i>schmiedeknechti</i> (Smits van Burgst, 1913, <i>Anilastus</i>)</p>							England, Scotland, Wales, Ireland
300521	Animalia		Arthropoda			Insecta			Hymenoptera			Ichneumonoidea	Ichneumonidae	CAMPOPLEGINAE			Hyposoter		discedens				(Schmiedeknecht, 1909)	<p style="margin-left: 40px;"><i>Anilastus discedens</i> Schmiedeknecht, 1909</p>							Ireland
300522	Animalia		Arthropoda			Insecta			Hymenoptera			Ichneumonoidea	Ichneumonidae	CAMPOPLEGINAE			Hyposoter		dolosus				(Gravenhorst, 1829)	<p style="margin-left: 40px;"><i>Campoplex dolosus</i> Gravenhorst, 1829</p><p style="margin-left: 40px;"><i>rufimanus</i> (Gravenhorst, 1829, <i>Campoplex</i>)</p><p style="margin-left: 40px;"><i>oculatus</i> (Tschek, 1871, <i>Limneria</i>)</p>							England, Scotland
300523	Animalia		Arthropoda			Insecta			Hymenoptera			Ichneumonoidea	Ichneumonidae	CAMPOPLEGINAE			Hyposoter		fitchii				(Bridgman, 1881)	<p style="margin-left: 40px;"><i>Limneria fitchii</i> Bridgman, 1881</p>
300524	Animalia		Arthropoda			Insecta			Hymenoptera			Ichneumonoidea	Ichneumonidae	CAMPOPLEGINAE			Hyposoter		inquinatus				(Holmgren, 1860)	<p style="margin-left: 40px;"><i>Limneria inquinata</i> Holmgren, 1860</p>							Scotland		One British specimen (no locality) in NHM but pointing the other direction, implying erroneous identification (by J.F. Perkins?). Carried over from the 1978 checklist and on the basis of material in UM, det. J.P. Brock.
300525	Animalia		Arthropoda			Insecta			Hymenoptera			Ichneumonoidea	Ichneumonidae	CAMPOPLEGINAE			Hyposoter		leucomerus				(Thomson, 1887)	<p style="margin-left: 40px;"><i>Anilasta leucomera</i> Thomson, 1887</p><p style="margin-left: 40px;"><i>tricinctus</i> (Holmgren, 1858, <i>Limneria</i>)</p>							England, Ireland		NMS, det. Horstmann, added here
300526	Animalia		Arthropoda			Insecta			Hymenoptera			Ichneumonoidea	Ichneumonidae	CAMPOPLEGINAE			Hyposoter		longulus				(Thomson, 1887)	<p style="margin-left: 40px;"><i>Anilasta longula</i> Thomson, 1887</p>							England, Scotland, Wales
300527	Animalia		Arthropoda			Insecta			Hymenoptera			Ichneumonoidea	Ichneumonidae	CAMPOPLEGINAE			Hyposoter		neglectus				(Holmgren, 1860)	<p style="margin-left: 40px;"><i>Limneria neglecta</i> Holmgren, 1860</p><p style="margin-left: 40px;"><i>varicoxa</i> (Thomson, 1887, <i>Anilasta</i>)</p><p style="margin-left: 40px;"><i>variicoxus</i> (Dalla Torre, 1901, <i>Anilastus</i>)</p>							Scotland		NMS, det. Horstmann, added here
300528	Animalia		Arthropoda			Insecta			Hymenoptera			Ichneumonoidea	Ichneumonidae	CAMPOPLEGINAE			Hyposoter		notatus				(Gravenhorst, 1829)	<p style="margin-left: 40px;"><i>Campoplex notatus</i> Gravenhorst, 1829</p>							England, Scotland, Wales, Ireland
300529	Animalia		Arthropoda			Insecta			Hymenoptera			Ichneumonoidea	Ichneumonidae	CAMPOPLEGINAE			Hyposoter		obscurellus				(Holmgren, 1860)	<p style="margin-left: 40px;"><i>Limneria obscurella</i> Holmgren, 1860</p>
300530	Animalia		Arthropoda			Insecta			Hymenoptera			Ichneumonoidea	Ichneumonidae	CAMPOPLEGINAE			Hyposoter		orbator				(Gravenhorst, 1829)	<p style="margin-left: 40px;"><i>Campoplex orbator</i> Gravenhorst, 1829</p><p style="margin-left: 40px;"><i>rufus</i> (Bridgman, 1882, <i>Limneria</i>)</p>
300531	Animalia		Arthropoda			Insecta			Hymenoptera			Ichneumonoidea	Ichneumonidae	CAMPOPLEGINAE			Hyposoter		placidus				(Desvignes, 1856)	<p style="margin-left: 40px;"><i>Campoplex placidus</i> Desvignes, 1856</p>							England
300532	Animalia		Arthropoda			Insecta			Hymenoptera			Ichneumonoidea	Ichneumonidae	CAMPOPLEGINAE			Hyposoter		rhodocerae				(Rondani, 1877)	<p style="margin-left: 40px;"><i>Tryphon rhodocerae</i> Rondani, 1877</p><p style="margin-left: 40px;"><i>ebeninus</i> misident.</p>							England, Ireland
300533	Animalia		Arthropoda			Insecta			Hymenoptera			Ichneumonoidea	Ichneumonidae	CAMPOPLEGINAE			Hyposoter		ruficrus				(Thomson, 1887)	<p style="margin-left: 40px;"><i>Anilasta ruficrus</i> Thomson, 1887</p>							England		NMS, det. Horstmann, added here
300534	Animalia		Arthropoda			Insecta			Hymenoptera			Ichneumonoidea	Ichneumonidae	CAMPOPLEGINAE			Hyposoter		thuringiacus				(Schmiedeknecht, 1909)	<p style="margin-left: 40px;"><i>Anilastus thuringiacus</i> Schmiedeknecht, 1909</p>							England, Ireland
300535	Animalia		Arthropoda			Insecta			Hymenoptera			Ichneumonoidea	Ichneumonidae	CAMPOPLEGINAE			Hyposoter		tricolor				(Ratzeburg, 1844)	<p style="margin-left: 40px;"><i>Campoplex tricolor</i> Ratzeburg, 1844</p><p style="margin-left: 40px;"><i>vidua</i> misident.</p><p style="margin-left: 40px;"><i>henaultii</i> (Desvignes, 1856, <i>Campoplex</i>)</p>							England, Scotland
300536	Animalia		Arthropoda			Insecta			Hymenoptera			Ichneumonoidea	Ichneumonidae	CAMPOPLEGINAE			Hyposoter		virginalis				(Gravenhorst, 1829)	<p style="margin-left: 40px;"><i>Campoplex virginalis</i> Gravenhorst, 1829</p>							England		distribution data from Horstmann (2000d)
300537	Animalia		Arthropoda			Insecta			Hymenoptera			Ichneumonoidea	Ichneumonidae	CAMPOPLEGINAE			Hyposoter		vividus				(Holmgren, 1860)	<p style="margin-left: 40px;"><i>Limneria vivida</i> Holmgren, 1860</p><p style="margin-left: 40px;"><i>albicrus</i> (Thomson, 1877, <i>Anilasta</i>)</p>							England		NHM, added here
300538	Animalia		Arthropoda			Insecta			Hymenoptera			Ichneumonoidea	Ichneumonidae	CAMPOPLEGINAE			Lathroplex						Förster, 1869
300539	Animalia		Arthropoda			Insecta			Hymenoptera			Ichneumonoidea	Ichneumonidae	CAMPOPLEGINAE			Lathroplex		clypearis				Thomson, 1887								England		NMS, det. Horstmann, added here
300540	Animalia		Arthropoda			Insecta			Hymenoptera			Ichneumonoidea	Ichneumonidae	CAMPOPLEGINAE			Lathrostizus						Förster, 1869	<p style="margin-left: 40px;"><i>LATHROSTIZA</i> Thomson, 1887</p>
300541	Animalia		Arthropoda			Insecta			Hymenoptera			Ichneumonoidea	Ichneumonidae	CAMPOPLEGINAE			Lathrostizus		clypeatus				(Brischke, 1880)	<p style="margin-left: 40px;"><i>Limneria clypeata</i> Brischke, 1880</p><p style="margin-left: 40px;"><i>sternocerus</i> (Thomson, 1887, <i>Lathrostiza</i>)</p>							Scotland
300542	Animalia		Arthropoda			Insecta			Hymenoptera			Ichneumonoidea	Ichneumonidae	CAMPOPLEGINAE			Lathrostizus		lugens				(Gravenhorst, 1829)	<p style="margin-left: 40px;"><i>Campoplex lugens</i> Gravenhorst, 1829</p><p style="margin-left: 40px;"><i>vestigialis</i> (Ratzeburg, 1852, <i>Campoplex</i>)</p>							England, Ireland, Isle of Man
300543	Animalia		Arthropoda			Insecta			Hymenoptera			Ichneumonoidea	Ichneumonidae	CAMPOPLEGINAE			Lemophagus						Townes, 1965	<p style="margin-left: 40px;"><i>HOLOCREMNODES</i> Aubert, 1986</p>
300544	Animalia		Arthropoda			Insecta			Hymenoptera			Ichneumonoidea	Ichneumonidae	CAMPOPLEGINAE			Lemophagus		curtus				Townes, 1965								England, Wales		added by Cox (2007); NHM; NMS
300545	Animalia		Arthropoda			Insecta			Hymenoptera			Ichneumonoidea	Ichneumonidae	CAMPOPLEGINAE			Lemophagus		errabundus				(Gravenhorst, 1829)	<p style="margin-left: 40px;"><i>Campoplex errabundus</i> Gravenhorst, 1829</p>							England		added by Salisbury (2003)
300546	Animalia		Arthropoda			Insecta			Hymenoptera			Ichneumonoidea	Ichneumonidae	CAMPOPLEGINAE			Leptocampoplex						Horstmann, 1970
300547	Animalia		Arthropoda			Insecta			Hymenoptera			Ichneumonoidea	Ichneumonidae	CAMPOPLEGINAE			Leptocampoplex		cremastoides				(Holmgren, 1860)	<p style="margin-left: 40px;"><i>Nemeritis cremastoides</i> Holmgren, 1860</p>							England, Scotland		NMS, NHM, added here; Horstmann (1999a) removed punctulatus (Ratze.) to a synonym of Porizon moderator (L.).
300548	Animalia		Arthropoda			Insecta			Hymenoptera			Ichneumonoidea	Ichneumonidae	CAMPOPLEGINAE			Macrus						Gravenhorst, 1829
300549	Animalia		Arthropoda			Insecta			Hymenoptera			Ichneumonoidea	Ichneumonidae	CAMPOPLEGINAE			Macrus		parvulus				(Gravenhorst, 1829)	<p style="margin-left: 40px;"><i>Campoplex parvulus</i> Gravenhorst, 1829</p><p style="margin-left: 40px;"><i>fusicornis</i> (Roman, 1923, <i>Lathroplex0029</i>)</p>							England, Scotland
300550	Animalia		Arthropoda			Insecta			Hymenoptera			Ichneumonoidea	Ichneumonidae	CAMPOPLEGINAE			Melanoplex						Horstmann, 1987
300551	Animalia		Arthropoda			Insecta			Hymenoptera			Ichneumonoidea	Ichneumonidae	CAMPOPLEGINAE			Melanoplex		bucculentus				(Holmgren, 1860)	<p style="margin-left: 40px;"><i>Limneria bucculentus</i> Holmgren, 1860</p>							England		NHM, det. Horstmann, added here
300552	Animalia		Arthropoda			Insecta			Hymenoptera			Ichneumonoidea	Ichneumonidae	CAMPOPLEGINAE			Meloboris						Holmgren, 1859	<p style="margin-left: 40px;"><i>ASINAMORA</i> Förster, 1869</p><p style="margin-left: 40px;"><i>NEPIERA</i> Förster, 1869</p><p style="margin-left: 40px;"><i>PSEUDOCYMODUSA</i> Habermehl, 1922</p><p style="margin-left: 40px;"><i>ANOIXIS</i> Townes, 1970</p>
300553	Animalia		Arthropoda			Insecta			Hymenoptera			Ichneumonoidea	Ichneumonidae	CAMPOPLEGINAE			Meloboris		alternans				(Gravenhorst, 1829)	<p style="margin-left: 40px;"><i>Campoplex alternans</i> Gravenhorst, 1829</p><p style="margin-left: 40px;"><i>elachistae</i> (Brischke, 1880, <i>Cymodusa</i>)</p><p style="margin-left: 40px;"><i>ruficornis</i> (Bridgman, 1884, <i>Limneria</i>)</p>							England, Scotland, Ireland
300554	Animalia		Arthropoda			Insecta			Hymenoptera			Ichneumonoidea	Ichneumonidae	CAMPOPLEGINAE			Meloboris		cingulata				Horstmann, 2004								Scotland		added by Horstmann (2004a)
300555	Animalia		Arthropoda			Insecta			Hymenoptera			Ichneumonoidea	Ichneumonidae	CAMPOPLEGINAE			Meloboris		collector				(Thunberg, 1824)	<p style="margin-left: 40px;"><i>Ichneumon collector</i> Thunberg, 1824</p><p style="margin-left: 40px;"><i>concinna</i> (Holmgren, 1860, <i>Limneria</i>)</p><p style="margin-left: 40px;"><i>signata</i> (Szépligeti, 1916, <i>Omorgus</i>)</p><p style="margin-left: 40px;"><i>foersteri</i> (Kiss, 1924, <i>Idechthis</i>)</p><p style="margin-left: 40px;"><i>albicincta</i> (Seyrig, 1927, <i>Angitia</i>…							England, Scotland, Wales, Ireland, Isle of Man
300556	Animalia		Arthropoda			Insecta			Hymenoptera			Ichneumonoidea	Ichneumonidae	CAMPOPLEGINAE			Meloboris		gracilis				Holmgren, 1859	<p style="margin-left: 40px;"><i>monticolana</i> (Bridgman, 1881, <i>Limneria</i>)</p>							England, Scotland, Ireland
300557	Animalia		Arthropoda			Insecta			Hymenoptera			Ichneumonoidea	Ichneumonidae	CAMPOPLEGINAE			Meloboris		neglecta				(Habermehl, 1923)	<p style="margin-left: 40px;"><i>Pseudocymodusa neglecta</i> Habermehl, 1923</p>
300558	Animalia		Arthropoda			Insecta			Hymenoptera			Ichneumonoidea	Ichneumonidae	CAMPOPLEGINAE			Meloboris		proxima				(Perkins, 1942)	<p style="margin-left: 40px;"><i>Nepiera proxima</i> Perkins, 1942</p>							England, Scotland, Ireland		NHM, NMS, det. Horstmann, added here
300559	Animalia		Arthropoda			Insecta			Hymenoptera			Ichneumonoidea	Ichneumonidae	CAMPOPLEGINAE			Nemeritis						Holmgren, 1860	<p style="margin-left: 40px;"><i>PSEUDONEMERITIS</i> Szépligeti, 1916</p>									Distribution data for Nemeritis species from Horstmann (1994a).
300560	Animalia		Arthropoda			Insecta			Hymenoptera			Ichneumonoidea	Ichneumonidae	CAMPOPLEGINAE			Nemeritis		breviventris				Horstmann, 1975								England		NHM, det. Horstmann, added here
300561	Animalia		Arthropoda			Insecta			Hymenoptera			Ichneumonoidea	Ichneumonidae	CAMPOPLEGINAE			Nemeritis		caudatula				Thomson, 1887	<p style="margin-left: 40px;"><i>rhaphidiae</i> Kriechbaumer, 1892</p><p style="margin-left: 40px;"><i>raphidiae</i> Dalla Torre, 1901</p><p style="margin-left: 40px;"><i>monticola</i> Habermehl, 1922</p>							England
300562	Animalia		Arthropoda			Insecta			Hymenoptera			Ichneumonoidea	Ichneumonidae	CAMPOPLEGINAE			Nemeritis		cingulata				Horstmann, 1980								England
300563	Animalia		Arthropoda			Insecta			Hymenoptera			Ichneumonoidea	Ichneumonidae	CAMPOPLEGINAE			Nemeritis		fallax				(Gravenhorst, 1829)	<p style="margin-left: 40px;"><i>Campoplex fallax</i> Gravenhorst, 1829</p><p style="margin-left: 40px;"><i>crassiceps</i> Habermehl, 1922</p>							England		NMS, NHM, det. Horstmann, added here
300564	Animalia		Arthropoda			Insecta			Hymenoptera			Ichneumonoidea	Ichneumonidae	CAMPOPLEGINAE			Nemeritis		lativentris				Thomson, 1887								England
300565	Animalia		Arthropoda			Insecta			Hymenoptera			Ichneumonoidea	Ichneumonidae	CAMPOPLEGINAE			Nemeritis		macrocentra				(Gravenhorst, 1829)	<p style="margin-left: 40px;"><i>Campoplex macrocentrus</i> Gravenhorst, 1829</p><p style="margin-left: 40px;"><i>sordida</i> (Gravenhorst, 1829, <i>Campoplex</i>)</p><p style="margin-left: 40px;"><i>varipes</i> (Gravenhorst, 1829, <i>Campoplex</i>)</p><p style="margin-left: 40px;"><i>antennalis</i> (Szépligeti, 1916, <i>Angitia</i>)</p><p style="margin-left: 40px;"><i>caudata</i> (Szépligeti, 19…							England, Ireland
300566	Animalia		Arthropoda			Insecta			Hymenoptera			Ichneumonoidea	Ichneumonidae	CAMPOPLEGINAE			Nemeritis		silvicola				Horstmann, 1973								England
300567	Animalia		Arthropoda			Insecta			Hymenoptera			Ichneumonoidea	Ichneumonidae	CAMPOPLEGINAE			Nemeritis		stenura				Thomson, 1887										One English specimen in NMS tentatively identified by K. Horstmann; carried over from Fitton et al.’s (1978) checklist.
300568	Animalia		Arthropoda			Insecta			Hymenoptera			Ichneumonoidea	Ichneumonidae	CAMPOPLEGINAE			Nepiesta						Förster, 1869
300569	Animalia		Arthropoda			Insecta			Hymenoptera			Ichneumonoidea	Ichneumonidae	CAMPOPLEGINAE			Nepiesta		mandibularis				(Holmgren, 1860)	<p style="margin-left: 40px;"><i>Limneria mandibularis</i> Holmgren, 1860</p><p style="margin-left: 40px;"><i>aberrans</i> misident.</p><p style="margin-left: 40px;"><i>umbrata</i> (Brischke, 1880, <i>Canidia</i>)</p><p style="margin-left: 40px;"><i>nigra</i> Szépligeti, 1901</p>							England, Scotland, Ireland
300570	Animalia		Arthropoda			Insecta			Hymenoptera			Ichneumonoidea	Ichneumonidae	CAMPOPLEGINAE			Nepiesta		subclavata				Thomson, 1887								England		NMS, det Horstmann, added here
300571	Animalia		Arthropoda			Insecta			Hymenoptera			Ichneumonoidea	Ichneumonidae	CAMPOPLEGINAE			Nepiesta		tricingulata				Horstmann, 1973								England		NMS, det Horstmann, added here
300572	Animalia		Arthropoda			Insecta			Hymenoptera			Ichneumonoidea	Ichneumonidae	CAMPOPLEGINAE			Olesicampe						Förster, 1869	<p style="margin-left: 40px;"><i>LIMNERIA</i> Förster, 1859</p><p style="margin-left: 40px;"><i>HOLOCREMNUS</i> Förster, 1869</p><p style="margin-left: 40px;"><i>OMOBORUS</i> Förster, 1869</p><p style="margin-left: 40px;"><i>HOLOCREMNA</i> Thomson, 1887</p><p style="margin-left: 40px;"><i>OLESICAMPA</i> Thomson, 1887</p>									Species of Olesicampe excluded from the British and Irish list: [monticola (Hedwig, 1938, Holocremna)] Welsh specimens in NHM, ex Cephalcia alpina (not a British native), det. K. Horstmann and I.D. Gauld, presumably brought over for biocontrol purposes. [ratzeburgi (Tschek, 1871, Limneria)] Released in Wales for biocontrol purposes but with no evidence of successful establishment (Billany et al.,…
300573	Animalia		Arthropoda			Insecta			Hymenoptera			Ichneumonoidea	Ichneumonidae	CAMPOPLEGINAE			Olesicampe		alboplica				(Thomson, 1887)	<p style="margin-left: 40px;"><i>Olesicampa alboplica</i> Thomson, 1887</p><p style="margin-left: 40px;"><i>simplex</i> (Thomson, 1887, <i>Olesicampa</i>)</p>							England, Ireland
300574	Animalia		Arthropoda			Insecta			Hymenoptera			Ichneumonoidea	Ichneumonidae	CAMPOPLEGINAE			Olesicampe		argentata				(Gravenhorst, 1829)	<p style="margin-left: 40px;"><i>Campoplex argentatus</i> Gravenhorst, 1829</p>							Scotland
300575	Animalia		Arthropoda			Insecta			Hymenoptera			Ichneumonoidea	Ichneumonidae	CAMPOPLEGINAE			Olesicampe		auctor				(Gravenhorst, 1829)	<p style="margin-left: 40px;"><i>Campoplex auctor</i> Gravenhorst, 1829</p><p style="margin-left: 40px;"><i>limbata</i> (Gravenhorst, 1829, <i>Campoplex</i>)</p><p style="margin-left: 40px;"><i>auctrix</i> (Schulz, 1906, <i>Olesicampa</i>)</p>							England
300576	Animalia		Arthropoda			Insecta			Hymenoptera			Ichneumonoidea	Ichneumonidae	CAMPOPLEGINAE			Olesicampe		binotata				(Thomson, 1887)	<p style="margin-left: 40px;"><i>Olesicampa binotata</i> Thomson, 1887</p>							England, Scotland		NHM, det. Perkins, added here
300577	Animalia		Arthropoda			Insecta			Hymenoptera			Ichneumonoidea	Ichneumonidae	CAMPOPLEGINAE			Olesicampe		buccata				(Thomson, 1887)	<p style="margin-left: 40px;"><i>Holocremna buccata</i> Thomson, 1887</p>							Ireland
300578	Animalia		Arthropoda			Insecta			Hymenoptera			Ichneumonoidea	Ichneumonidae	CAMPOPLEGINAE			Olesicampe		canaliculata				(Gravenhorst, 1829)	<p style="margin-left: 40px;"><i>Campoplex canaliculatus</i> Gravenhorst, 1829</p>							Isle of Man		NMS, det. Horstmann, added here
300579	Animalia		Arthropoda			Insecta			Hymenoptera			Ichneumonoidea	Ichneumonidae	CAMPOPLEGINAE			Olesicampe		cavigena				(Thomson, 1887)	<p style="margin-left: 40px;"><i>Olesicampa cavigena</i> Thomson, 1887</p>
300580	Animalia		Arthropoda			Insecta			Hymenoptera			Ichneumonoidea	Ichneumonidae	CAMPOPLEGINAE			Olesicampe		clandestina				(Holmgren, 1860)	<p style="margin-left: 40px;"><i>Limneria clandestina</i> Holmgren, 1860</p>							England, Ireland		distribution data from Shaw (1999a)
300581	Animalia		Arthropoda			Insecta			Hymenoptera			Ichneumonoidea	Ichneumonidae	CAMPOPLEGINAE			Olesicampe		crassitarsis				(Thomson, 1887)	<p style="margin-left: 40px;"><i>Olesicampa crassitarsis</i> Thomson, 1887</p>							Scotland, Ireland
300582	Animalia		Arthropoda			Insecta			Hymenoptera			Ichneumonoidea	Ichneumonidae	CAMPOPLEGINAE			Olesicampe		erythropyga				(Holmgren, 1860)	<p style="margin-left: 40px;"><i>Limneria erythropyga</i> Holmgren, 1860</p>							Ireland
300583	Animalia		Arthropoda			Insecta			Hymenoptera			Ichneumonoidea	Ichneumonidae	CAMPOPLEGINAE			Olesicampe		femorella				(Thomson, 1887)	<p style="margin-left: 40px;"><i>Olesicampa femorella</i> Thomson, 1887</p>							England		NHM, det. Perkins, added here
300584	Animalia		Arthropoda			Insecta			Hymenoptera			Ichneumonoidea	Ichneumonidae	CAMPOPLEGINAE			Olesicampe		forticostata				(Schmiedeknecht, 1909)	<p style="margin-left: 40px;"><i>Anilastus forticostatus</i> Schmiedeknecht, 1909</p>							England
300585	Animalia		Arthropoda			Insecta			Hymenoptera			Ichneumonoidea	Ichneumonidae	CAMPOPLEGINAE			Olesicampe		fulcrans				(Thomson, 1887)	<p style="margin-left: 40px;"><i>Olesicampa fulcrans</i> Thomson, 1887</p>							England, Scotland, Ireland
300586	Animalia		Arthropoda			Insecta			Hymenoptera			Ichneumonoidea	Ichneumonidae	CAMPOPLEGINAE			Olesicampe		fulviventris				(Gmelin, 1790)	<p style="margin-left: 40px;"><i>Ichneumon fulviventris</i> Gmelin, 1790</p>							England, Ireland
300587	Animalia		Arthropoda			Insecta			Hymenoptera			Ichneumonoidea	Ichneumonidae	CAMPOPLEGINAE			Olesicampe		geniculella				(Thomson, 1887)	<p style="margin-left: 40px;"><i>Olesicampa geniculella</i> Thomson, 1887</p>							Scotland, Ireland
300588	Animalia		Arthropoda			Insecta			Hymenoptera			Ichneumonoidea	Ichneumonidae	CAMPOPLEGINAE			Olesicampe		gracilipes				(Thomson, 1887)	<p style="margin-left: 40px;"><i>Olesicampa gracilipes</i> Thomson, 1887</p>							Ireland
300589	Animalia		Arthropoda			Insecta			Hymenoptera			Ichneumonoidea	Ichneumonidae	CAMPOPLEGINAE			Olesicampe		longipes				(Müller, 1776)	<p style="margin-left: 40px;"><i>Ichneumon longipes</i> Müller, 1776</p><p style="margin-left: 40px;"><i>canescens</i> (Gmelin, 1790, <i>Ichneumon</i>)</p>							Ireland
300590	Animalia		Arthropoda			Insecta			Hymenoptera			Ichneumonoidea	Ichneumonidae	CAMPOPLEGINAE			Olesicampe		macellator				(Thunberg, 1824)	<p style="margin-left: 40px;"><i>Ichneumon macellator</i> Thunberg, 1824</p><p style="margin-left: 40px;"><i>retecta</i> (Hartig, 1838, <i>Campoplex</i>)</p><p style="margin-left: 40px;"><i>cothurnata</i> (Holmgren, 1860, <i>Limneria</i>)</p><p style="margin-left: 40px;"><i>frutetorum</i> (Thomson, 1887, <i>Holocremna</i>)</p>							England, Scotland
300591	Animalia		Arthropoda			Insecta			Hymenoptera			Ichneumonoidea	Ichneumonidae	CAMPOPLEGINAE			Olesicampe		nigroplica				(Thomson, 1887)	<p style="margin-left: 40px;"><i>Olesicampa nigroplica</i> Thomson, 1887</p>							England, Scotland
300592	Animalia		Arthropoda			Insecta			Hymenoptera			Ichneumonoidea	Ichneumonidae	CAMPOPLEGINAE			Olesicampe		pagana				(Holmgren, 1860)	<p style="margin-left: 40px;"><i>Limneria pagana</i> Holmgren, 1860</p>
300593	Animalia		Arthropoda			Insecta			Hymenoptera			Ichneumonoidea	Ichneumonidae	CAMPOPLEGINAE			Olesicampe		paludicola				(Holmgren, 1860)	<p style="margin-left: 40px;"><i>Limneria paludicola</i> Holmgren, 1860</p><p style="margin-left: 40px;"><i>inculcator</i> misident.</p><p style="margin-left: 40px;"><i>?sagittaria</i> (Müller, 1776, <i>Ichneumon</i>)</p>							England, Ireland
300594	Animalia		Arthropoda			Insecta			Hymenoptera			Ichneumonoidea	Ichneumonidae	CAMPOPLEGINAE			Olesicampe		patellana				(Thomson, 1887)	<p style="margin-left: 40px;"><i>Olesicampa patellana</i> Thomson, 1887</p>							Scotland, Ireland		NHM, det. Perkins, added here
300595	Animalia		Arthropoda			Insecta			Hymenoptera			Ichneumonoidea	Ichneumonidae	CAMPOPLEGINAE			Olesicampe		praecox				(Holmgren, 1860)	<p style="margin-left: 40px;"><i>Limneria praecox</i> Holmgren, 1860</p>							Ireland
300596	Animalia		Arthropoda			Insecta			Hymenoptera			Ichneumonoidea	Ichneumonidae	CAMPOPLEGINAE			Olesicampe		proterva				(Brischke, 1880)	<p style="margin-left: 40px;"><i>Limneria proterva</i> Brischke, 1880</p><p style="margin-left: 40px;"><i>luteipes</i> (Thomson, 1887, <i>Olesicampa</i>)</p><p style="margin-left: 40px;"><i>subcallosa</i> (Thomson, 1887, <i>Olesicampa</i>)</p>							Ireland
300597	Animalia		Arthropoda			Insecta			Hymenoptera			Ichneumonoidea	Ichneumonidae	CAMPOPLEGINAE			Olesicampe		pubescens				(Ratzeburg, 1844)	<p style="margin-left: 40px;"><i>Campoplex pubescens</i> Ratzeburg, 1844</p><p style="margin-left: 40px;"><i>hyalinata</i> (Holmgren, 1860, <i>Limneria</i>)</p>							Ireland
300598	Animalia		Arthropoda			Insecta			Hymenoptera			Ichneumonoidea	Ichneumonidae	CAMPOPLEGINAE			Olesicampe		retusa				(Thomson, 1887)	<p style="margin-left: 40px;"><i>Olesicampa retusa</i> Thomson, 1887</p>
300599	Animalia		Arthropoda			Insecta			Hymenoptera			Ichneumonoidea	Ichneumonidae	CAMPOPLEGINAE			Olesicampe		sericea				(Holmgren, 1856)	<p style="margin-left: 40px;"><i>Campoplex sericeus</i> Holmgren, 1856</p>							England, Ireland
300600	Animalia		Arthropoda			Insecta			Hymenoptera			Ichneumonoidea	Ichneumonidae	CAMPOPLEGINAE			Olesicampe		sinuata				(Thomson, 1887)	<p style="margin-left: 40px;"><i>Holocremna sinuata</i> Thomson, 1887</p>							England, Scotland		NHM, det. Perkins, UM, added here
300601	Animalia		Arthropoda			Insecta			Hymenoptera			Ichneumonoidea	Ichneumonidae	CAMPOPLEGINAE			Olesicampe		transiens				(Ratzeburg, 1848)	<p style="margin-left: 40px;"><i>Campoplex transiens</i> Ratzeburg, 1848</p><p style="margin-left: 40px;"><i>incrassator</i> (Holmgren, 1856, <i>Campoplex</i>)</p>							England, Scotland, Wales, Ireland
300602	Animalia		Arthropoda			Insecta			Hymenoptera			Ichneumonoidea	Ichneumonidae	CAMPOPLEGINAE			Olesicampe		vexata				(Holmgren, 1860)	<p style="margin-left: 40px;"><i>Limneria vexata</i> Holmgren, 1860</p>
300603	Animalia		Arthropoda			Insecta			Hymenoptera			Ichneumonoidea	Ichneumonidae	CAMPOPLEGINAE			Olesicampe		vitripennis				(Holmgren, 1860)	<p style="margin-left: 40px;"><i>Limneria vitripennis</i> Holmgren, 1860</p>
300604	Animalia		Arthropoda			Insecta			Hymenoptera			Ichneumonoidea	Ichneumonidae	CAMPOPLEGINAE			Phobocampe						Förster, 1869	<p style="margin-left: 40px;"><i>HYPOTHEREUTES</i> Förster, 1869</p><p style="margin-left: 40px;"><i>PHOBOCAMPA</i> Thomson, 1887</p>
300605	Animalia		Arthropoda			Insecta			Hymenoptera			Ichneumonoidea	Ichneumonidae	CAMPOPLEGINAE			Phobocampe		alticollis				(Thomson, 1887)	<p style="margin-left: 40px;"><i>Phobocampa alticollis</i> Thomson, 1887</p>							England		added by Horstmann (2006d)
300606	Animalia		Arthropoda			Insecta			Hymenoptera			Ichneumonoidea	Ichneumonidae	CAMPOPLEGINAE			Phobocampe		bicingulata				(Gravenhorst, 1829)	<p style="margin-left: 40px;"><i>Campoplex bicingulatus</i> Gravenhorst, 1829</p>							England, Scotland, Wales
300607	Animalia		Arthropoda			Insecta			Hymenoptera			Ichneumonoidea	Ichneumonidae	CAMPOPLEGINAE			Phobocampe		brumatae				Horstmann, 2009								England, Scotland		added by Horstmann (2006d)
300608	Animalia		Arthropoda			Insecta			Hymenoptera			Ichneumonoidea	Ichneumonidae	CAMPOPLEGINAE			Phobocampe		confusa				(Thomson, 1887)	<p style="margin-left: 40px;"><i>Phobocampa confusa</i> Thomson, 1887</p>							England, Scotland, Ireland		Omitted by Fitton (1978) as it had previously only been recorded from Ireland (Stelfox, 1929), although it was also discussed as a British species by Shaw &amp; Askew (1976).
300609	Animalia		Arthropoda			Insecta			Hymenoptera			Ichneumonoidea	Ichneumonidae	CAMPOPLEGINAE			Phobocampe		coniferella				(Roman, 1914)	<p style="margin-left: 40px;"><i>Phobocampa coniferella</i> Roman, 1914</p><p style="margin-left: 40px;"><i>facialis</i> (Szépligeti, 1916, <i>Holocremnus</i>)</p>							England		added by Šedivý (2004); Britain given as a locality by Šedivý (2004) but the specimens in NHM are destroyed, leaving only the parasitoid cocoons; however there are English specimens in NMS, det. K. Horstmann.
300610	Animalia		Arthropoda			Insecta			Hymenoptera			Ichneumonoidea	Ichneumonidae	CAMPOPLEGINAE			Phobocampe		crassiuscula				(Gravenhorst, 1829)	<p style="margin-left: 40px;"><i>Campoplex crassiusculus</i> Gravenhorst, 1829</p>							England, Scotland
300611	Animalia		Arthropoda			Insecta			Hymenoptera			Ichneumonoidea	Ichneumonidae	CAMPOPLEGINAE			Phobocampe		croceipes				(Marshall, 1876)	<p style="margin-left: 40px;"><i>Limneria croceipes</i> Marshall, 1876</p><p style="margin-left: 40px;"><i>albitarsis</i> Szépligeti, 1916</p>							England, Scotland
300612	Animalia		Arthropoda			Insecta			Hymenoptera			Ichneumonoidea	Ichneumonidae	CAMPOPLEGINAE			Phobocampe		flavicincta				(Thomson, 1887)	<p style="margin-left: 40px;"><i>Phobocampa flavicincta</i> Thomson, 1887</p>							Scotland		NHM, det. Perkins, added here
300613	Animalia		Arthropoda			Insecta			Hymenoptera			Ichneumonoidea	Ichneumonidae	CAMPOPLEGINAE			Phobocampe		horstmanni				Šedivý, 2004								England, Scotland		NMS, det. Horstmann, added here
300614	Animalia		Arthropoda			Insecta			Hymenoptera			Ichneumonoidea	Ichneumonidae	CAMPOPLEGINAE			Phobocampe		lymantriae				Gupta, 1983								England		NMS, det. Horstmann, added here
300615	Animalia		Arthropoda			Insecta			Hymenoptera			Ichneumonoidea	Ichneumonidae	CAMPOPLEGINAE			Phobocampe		neglecta				(Holmgren, 1860)	<p style="margin-left: 40px;"><i>Limneria neglecta</i> Holmgren, 1860</p><p style="margin-left: 40px;"><i>varicoxa</i> (Thomson, 1887, <i>Anilasta</i>)</p><p style="margin-left: 40px;"><i>variicoxa</i> (Dalla Torre, 1901, <i>Anilastus</i>)</p>							England, Scotland
300616	Animalia		Arthropoda			Insecta			Hymenoptera			Ichneumonoidea	Ichneumonidae	CAMPOPLEGINAE			Phobocampe		nigra				Šedivý, 2004								England		NHM, det. Horstmann, added here
300617	Animalia		Arthropoda			Insecta			Hymenoptera			Ichneumonoidea	Ichneumonidae	CAMPOPLEGINAE			Phobocampe		pulchella				(Thomson, 1887)	<p style="margin-left: 40px;"><i>Phobocampa pulchella</i> Thomson, 1887</p>							England, Scotland		NMS, det. Horstmann, added here
300618	Animalia		Arthropoda			Insecta			Hymenoptera			Ichneumonoidea	Ichneumonidae	CAMPOPLEGINAE			Phobocampe		quercus				Horstmann, 2008								England		added by Horstmann (2008a)
300619	Animalia		Arthropoda			Insecta			Hymenoptera			Ichneumonoidea	Ichneumonidae	CAMPOPLEGINAE			Phobocampe		tempestiva				(Holmgren, 1860)	<p style="margin-left: 40px;"><i>Limneria tempestiva</i> Holmgren, 1860</p>							England, Scotland		NMS, det. Horstmann, added here
300620	Animalia		Arthropoda			Insecta			Hymenoptera			Ichneumonoidea	Ichneumonidae	CAMPOPLEGINAE			Phobocampe		unicincta				(Gravenhorst, 1829)	<p style="margin-left: 40px;"><i>Campoplex unicinctus</i> Gravenhorst, 1829</p><p style="margin-left: 40px;"><i>disparis</i> (Viereck, 1911, <i>Hyoposoter</i>)</p>							England
300621	Animalia		Arthropoda			Insecta			Hymenoptera			Ichneumonoidea	Ichneumonidae	CAMPOPLEGINAE			Phobocampe		variabilis				Šedivý, 2004								England		NMS, det. Horstmann, added here
300622	Animalia		Arthropoda			Insecta			Hymenoptera			Ichneumonoidea	Ichneumonidae	CAMPOPLEGINAE			Porizon						Fallén, 1813	<p style="margin-left: 40px;"><i>PHAEDROCTONUS</i> Förster, 1869</p>
300623	Animalia		Arthropoda			Insecta			Hymenoptera			Ichneumonoidea	Ichneumonidae	CAMPOPLEGINAE			Porizon		humuli				(Horstmann, 1987)	<p style="margin-left: 40px;"><i>Phaedroctonus humuli</i> Horstmann, 1987</p>							England		NMS, det. Horstmann, added here
300624	Animalia		Arthropoda			Insecta			Hymenoptera			Ichneumonoidea	Ichneumonidae	CAMPOPLEGINAE			Porizon		moderator				(Linnaeus, 1758)	<p style="margin-left: 40px;"><i>Ichneumon moderator</i> Linnaeus, 1758</p><p style="margin-left: 40px;"><i>strobinellae</i> (Christ, 1791, <i>Cynipsichneumon</i>)</p><p style="margin-left: 40px;"><i>flaviventris</i> (Ratzeburg, 1844, <i>Campoplex</i>)</p><p style="margin-left: 40px;"><i>punctulatus</i> (Ratzeburg, 1844, <i>Cremastus</i>)</p><p style="margin-left: 40px;"><i>ensifer</i> (Brischke,…							England, Scotland
300625	Animalia		Arthropoda			Insecta			Hymenoptera			Ichneumonoidea	Ichneumonidae	CAMPOPLEGINAE			Porizon		transfuga				(Gravenhorst, 1829)	<p style="margin-left: 40px;"><i>Campoplex transfuga</i> Gravenhorst, 1829</p><p style="margin-left: 40px;"><i>syringellae</i> Hedwig, 1944</p>							England, Scotland, Wales, Ireland, Isle of Man
300626	Animalia		Arthropoda			Insecta			Hymenoptera			Ichneumonoidea	Ichneumonidae	CAMPOPLEGINAE			Pyracmon						Holmgren, 1859
300627	Animalia		Arthropoda			Insecta			Hymenoptera			Ichneumonoidea	Ichneumonidae	CAMPOPLEGINAE			Pyracmon		fumipennis				(Zetterstedt, 1838)	<p style="margin-left: 40px;"><i>Porizon fumipennis</i> Zetterstedt, 1838</p>							Ireland
300628	Animalia		Arthropoda			Insecta			Hymenoptera			Ichneumonoidea	Ichneumonidae	CAMPOPLEGINAE			Pyracmon		sepiellus				(Holmgren, 1860)	<p style="margin-left: 40px;"><i>Limneria sepiella</i> Holmgren, 1860</p>							England		NHM, det. Horstmann, added here
300629	Animalia		Arthropoda			Insecta			Hymenoptera			Ichneumonoidea	Ichneumonidae	CAMPOPLEGINAE			Rhimphoctona						Förster, 1869	<p style="margin-left: 40px;"><i>PARAPYRACMON</i> Clément, 1924</p>
300630	Animalia		Arthropoda			Insecta			Hymenoptera			Ichneumonoidea	Ichneumonidae	CAMPOPLEGINAE			Rhimphoctona	Xylophylax					Kriechbaumer, 1878
300631	Animalia		Arthropoda			Insecta			Hymenoptera			Ichneumonoidea	Ichneumonidae	CAMPOPLEGINAE			Rhimphoctona	Xylophylax	megacephalus				(Gravenhorst, 1829)	<p style="margin-left: 40px;"><i>Campoplex megacephalus</i> Gravenhorst, 1829</p><p style="margin-left: 40px;"><i>corvina</i> (Gravenhorst, 1829, <i>Phytodietus</i>)</p><p style="margin-left: 40px;"><i>austriaca</i> (Tschek, 1871, <i>Pyracmon</i>)</p><p style="margin-left: 40px;"><i>megalocephalus</i> (Schulz, 1906, <i>Campoplex</i>)</p><p style="margin-left: 40px;"><i>rufipes</i> (Lange, 1911, <…							England
300632	Animalia		Arthropoda			Insecta			Hymenoptera			Ichneumonoidea	Ichneumonidae	CAMPOPLEGINAE			Rhimphoctona	Xylophylax	melanura				(Holmgren, 1860)	<p style="margin-left: 40px;"><i>Pyracmon melanurus</i> Holmgren, 1860</p><p style="margin-left: 40px;"><i>signata</i> (Habermehl, 1922, <i>Pyracmon</i>)</p>
300633	Animalia		Arthropoda			Insecta			Hymenoptera			Ichneumonoidea	Ichneumonidae	CAMPOPLEGINAE			Rhimphoctona	Xylophylax	obscuripes				(Holmgren, 1860)	<p style="margin-left: 40px;"><i>Pyracmon obscuripes</i> Holmgren, 1860</p><p style="margin-left: 40px;"><i>alpina</i> (Strobl, 1904, <i>Pyracmon</i>)</p>							Ireland
300634	Animalia		Arthropoda			Insecta			Hymenoptera			Ichneumonoidea	Ichneumonidae	CAMPOPLEGINAE			Rhimphoctona	Xylophylax	xoridiformis				(Holmgren, 1860)	<p style="margin-left: 40px;"><i>Pyracmon xoridiformis</i> Holmgren, 1860</p><p style="margin-left: 40px;"><i>nigerrima</i> (Kiss, 1924, <i>Eclytus</i>)</p>
300635	Animalia		Arthropoda			Insecta			Hymenoptera			Ichneumonoidea	Ichneumonidae	CAMPOPLEGINAE			Scirtetes						Hartig, 1838	<p style="margin-left: 40px;"><i>SPUDASTICA</i> Förster, 1869</p>
300636	Animalia		Arthropoda			Insecta			Hymenoptera			Ichneumonoidea	Ichneumonidae	CAMPOPLEGINAE			Scirtetes		robustus				(Woldstedt, 1874)	<p style="margin-left: 40px;"><i>Limneria robusta</i> Woldstedt, 1874</p><p style="margin-left: 40px;"><i>kriechbaumeri</i> (Bridgman, 1882, <i>Limneria</i>)</p><p style="margin-left: 40px;"><i>petiolaris</i> (Thomson, 1887, <i>Spudastica</i>)</p>							England, Scotland, Ireland
300637	Animalia		Arthropoda			Insecta			Hymenoptera			Ichneumonoidea	Ichneumonidae	CAMPOPLEGINAE			Sinophorus						Förster, 1869	<p style="margin-left: 40px;"><i>EULIMNERIA</i> Schmiedeknecht, 1907</p>									doubtfully placed species of Sinophorus: [paniscus (Gravenhorst, 1829, Campoplex) nom. dub.] Morley (1915) identified Sinophorus paniscus as British but this name is now a synonym of Macrus filiventris Gravenhorst, 1829 (Horstmann 1978a), a rarely collected southern European species; the identity of Morley’s specimens is not known.
300638	Animalia		Arthropoda			Insecta			Hymenoptera			Ichneumonoidea	Ichneumonidae	CAMPOPLEGINAE			Sinophorus		albidus				(Gmelin, 1790)	<p style="margin-left: 40px;"><i>Ichneumon albidus</i> Gmelin, 1790</p><p style="margin-left: 40px;"><i>hungaricus</i> (Szépligeti, 1916, <i>Omorgus</i>)</p>							England, Scotland
300639	Animalia		Arthropoda			Insecta			Hymenoptera			Ichneumonoidea	Ichneumonidae	CAMPOPLEGINAE			Sinophorus		bridgmanii				(Dalla Torre, 1901)	<p style="margin-left: 40px;"><i>Limnerium bridgmanii</i> Dalla Torre, 1901</p><p style="margin-left: 40px;"><i>distinctus</i> (Bridgman, 1887, <i>Limneria</i>)</p><p style="margin-left: 40px;"><i>renominatus</i> (Morley, 1915, <i>Limnerium</i>)</p>							England
300640	Animalia		Arthropoda			Insecta			Hymenoptera			Ichneumonoidea	Ichneumonidae	CAMPOPLEGINAE			Sinophorus		costalis				(Thomson, 1887)	<p style="margin-left: 40px;"><i>Limneria costalis</i> Thomson, 1887</p>							Ireland
300641	Animalia		Arthropoda			Insecta			Hymenoptera			Ichneumonoidea	Ichneumonidae	CAMPOPLEGINAE			Sinophorus		crassifemur				(Thomson, 1887)	<p style="margin-left: 40px;"><i>Limneria crassifemur</i> Thomson, 1887</p>							Ireland
300642	Animalia		Arthropoda			Insecta			Hymenoptera			Ichneumonoidea	Ichneumonidae	CAMPOPLEGINAE			Sinophorus		fuscicarpus				(Thomson, 1887)	<p style="margin-left: 40px;"><i>Limneria fuscicarpus</i> Thomson, 1887</p>							England		added by Sanborne (1984)
300643	Animalia		Arthropoda			Insecta			Hymenoptera			Ichneumonoidea	Ichneumonidae	CAMPOPLEGINAE			Sinophorus		geniculatus				(Gravenhorst, 1829)	<p style="margin-left: 40px;"><i>Campoplex geniculatus</i> Gravenhorst, 1829</p><p style="margin-left: 40px;"><i>nigritellus</i> (Thomson, 1887, <i>Limneria</i>)</p><p style="margin-left: 40px;"><i>argentator</i> (Aubert, 1960, <i>Campoplex</i>)</p>							Ireland
300644	Animalia		Arthropoda			Insecta			Hymenoptera			Ichneumonoidea	Ichneumonidae	CAMPOPLEGINAE			Sinophorus		juniperinus				(Holmgren, 1856)	<p style="margin-left: 40px;"><i>Campoplex juniperinus</i> Holmgren, 1856</p><p style="margin-left: 40px;"><i>ornatus</i> (Gregor, 1941, <i>Omorgus</i>)</p>							England, Ireland		added by Sanborne (1984)
300645	Animalia		Arthropoda			Insecta			Hymenoptera			Ichneumonoidea	Ichneumonidae	CAMPOPLEGINAE			Sinophorus		pleuralis				(Thomson, 1887)	<p style="margin-left: 40px;"><i>Limneria pleuralis</i> Thomson, 1887</p>							England		added by Sanborne (1984)
300646	Animalia		Arthropoda			Insecta			Hymenoptera			Ichneumonoidea	Ichneumonidae	CAMPOPLEGINAE			Sinophorus		turionum				(Ratzeburg, 1844)	<p style="margin-left: 40px;"><i>Campoplex turionum</i> Ratzeburg, 1844</p><p style="margin-left: 40px;"><i>spectabilis</i> (Rudow, 1883, <i>Limneria</i>)</p><p style="margin-left: 40px;"><i>planiscapus</i> (Thomson, 1887, <i>Limneria</i>)</p><p style="margin-left: 40px;"><i>rufifemur</i> (Thomson, 1887, <i>Limneria</i>)</p><p style="margin-left: 40px;"><i>nigrotibialis</i> (Kiss, 1926, <i>Eulimn…							England, Scotland, Ireland		some distribution data from Sanborne (1984)
300647	Animalia		Arthropoda			Insecta			Hymenoptera			Ichneumonoidea	Ichneumonidae	CAMPOPLEGINAE			Sinophorus		xanthostomus				(Gravenhorst, 1829)	<p style="margin-left: 40px;"><i>Campoplex xanthostomus</i> Gravenhorst, 1829</p><p style="margin-left: 40px;"><i>pineticola</i> (Thomson, 1887, <i>Limneria</i>)</p><p style="margin-left: 40px;"><i>deserticola</i> (Tosquinet, 1896, <i>Campoplex</i>)</p>
300648	Animalia		Arthropoda			Insecta			Hymenoptera			Ichneumonoidea	Ichneumonidae	CAMPOPLEGINAE			Synetaeris						Förster, 1869
300649	Animalia		Arthropoda			Insecta			Hymenoptera			Ichneumonoidea	Ichneumonidae	CAMPOPLEGINAE			Synetaeris		heteropus				Thomson, 1887								Scotland
300650	Animalia		Arthropoda			Insecta			Hymenoptera			Ichneumonoidea	Ichneumonidae	CAMPOPLEGINAE			Tranosema						Förster, 1869
300651	Animalia		Arthropoda			Insecta			Hymenoptera			Ichneumonoidea	Ichneumonidae	CAMPOPLEGINAE			Tranosema		carbonellum				(Thomson, 1887)	<p style="margin-left: 40px;"><i>Synetaeris carbonella</i> Thomson, 1887</p><p style="margin-left: 40px;"><i>aterrimum</i> (Strobl, 1904, <i>Pyracmon</i>)</p><p style="margin-left: 40px;"><i>rossicum</i> (Szépligeti, 1916, <i>Canidia</i>)</p>							England, Scotland		NHM, det. Broad, Perkins, added here
300652	Animalia		Arthropoda			Insecta			Hymenoptera			Ichneumonoidea	Ichneumonidae	CAMPOPLEGINAE			Tranosema		exoletum				(Thomson, 1887)	<p style="margin-left: 40px;"><i>Omorga exoleta</i> Thomson, 1887</p><p style="margin-left: 40px;"><i>geniculatum</i> (Ulbricht, 1910, <i>Omorgus</i>)</p>							England		NHM, det. Perkins, UM, added here
300653	Animalia		Arthropoda			Insecta			Hymenoptera			Ichneumonoidea	Ichneumonidae	CAMPOPLEGINAE			Tranosema		hyperboreum				(Thomson, 1887)	<p style="margin-left: 40px;"><i>Limneria hyperborea</i> Thomson, 1887</p>							England		NMS, det. Horstmann, added here
300654	Animalia		Arthropoda			Insecta			Hymenoptera			Ichneumonoidea	Ichneumonidae	CAMPOPLEGINAE			Tranosema		intermedium				(Szépligeti, 1916)	<p style="margin-left: 40px;"><i>Gonotypus intermedius</i> Szépligeti, 1916</p><p style="margin-left: 40px;"><i>majus</i> (Szépligeti, 1916, <i>Gonotypus</i>)</p><p style="margin-left: 40px;"><i>minus</i> (Szépligeti, 1916, <i>Gonotypus</i>)</p>							England		NMS, det. Horstmann, added here
300655	Animalia		Arthropoda			Insecta			Hymenoptera			Ichneumonoidea	Ichneumonidae	CAMPOPLEGINAE			Tranosema		latiusculum				(Thomson, 1887)	<p style="margin-left: 40px;"><i>Omorga latiuscula</i> Thomson, 1887</p>							England, Scotland		NMS, NHM, det. Horstmann, added here
300656	Animalia		Arthropoda			Insecta			Hymenoptera			Ichneumonoidea	Ichneumonidae	CAMPOPLEGINAE			Tranosema		nigridens				(Thomson, 1887)	<p style="margin-left: 40px;"><i>Omorga nigridens</i> Thomson, 1887</p><p style="margin-left: 40px;"><i>striolatum</i> (Thomson, 1887, <i>Omorga</i>)</p><p style="margin-left: 40px;"><i>alpinator</i> Aubert, 1966</p>							England		added by Horstmann (1978)
300657	Animalia		Arthropoda			Insecta			Hymenoptera			Ichneumonoidea	Ichneumonidae	CAMPOPLEGINAE			Tranosema		rostrale				(Brischke, 1880)	<p style="margin-left: 40px;"><i>Limneria rostralis</i> Brischke, 1880</p><p style="margin-left: 40px;"><i>arenicola</i> Thomson, 1887</p><p style="margin-left: 40px;"><i>thuringiacum</i> (Schmiedeknecht, 1907, <i>Sinophorus</i>)</p>							England, Scotland, Wales
300658	Animalia		Arthropoda			Insecta			Hymenoptera			Ichneumonoidea	Ichneumonidae	CAMPOPLEGINAE			Tranosemella						Horstmann, 1978
300659	Animalia		Arthropoda			Insecta			Hymenoptera			Ichneumonoidea	Ichneumonidae	CAMPOPLEGINAE			Tranosemella		citrofrontalis				(Hedwig, 1939)	<p style="margin-left: 40px;"><i>Anilasta citrofrontalis</i> Hedwig, 1939</p>							England, Scotland, Wales		NHM, NMS, det. Horstmann, Shaw, Broad, added here
300660	Animalia		Arthropoda			Insecta			Hymenoptera			Ichneumonoidea	Ichneumonidae	CAMPOPLEGINAE			Tranosemella		coxalis				(Brischke, 1880)	<p style="margin-left: 40px;"><i>Limneria coxalis</i> Brischke, 1880</p>							England		One British specimen in NHM is probably coxalis; another British specimen has been labelled 'robusta Wold.' (=Scirtetes) and an English specimen has been labelled as 'interruptus'. Locality data from reared specimens in NMS, det. K. Horstmann.
300661	Animalia		Arthropoda			Insecta			Hymenoptera			Ichneumonoidea	Ichneumonidae	CAMPOPLEGINAE			Tranosemella		praerogator				(Linnaeus, 1758)	<p style="margin-left: 40px;"><i>Ichneumon praerogator</i> Linnaeus, 1758</p><p style="margin-left: 40px;"><i>chrysogaster</i> (Gmelin, 1790, <i>Ichneumon</i>)</p><p style="margin-left: 40px;"><i>mandibulator</i> (Thunberg, 1824, <i>Ichneumon</i>)</p><p style="margin-left: 40px;"><i>interrupta</i> (Holmgren, 1858, <i>Limneria</i>)</p><p style="margin-left: 40px;"><i>laticrus</i> (Thomson, 1887, <…							England, Scotland, Wales, Ireland, Isle of Man		some distribution data from Shaw (1981a)
300662	Animalia		Arthropoda			Insecta			Hymenoptera			Ichneumonoidea	Ichneumonidae	CAMPOPLEGINAE			Venturia						Schrottky, 1902	<p style="margin-left: 40px;"><i>IDECHTHIS</i> Förster, 1869</p><p style="margin-left: 40px;"><i>DEVORGILLA</i> Cameron, 1907</p><p style="margin-left: 40px;"><i>NEMERITIS</i> misident.</p>
300663	Animalia		Arthropoda			Insecta			Hymenoptera			Ichneumonoidea	Ichneumonidae	CAMPOPLEGINAE			Venturia		canescens				(Gravenhorst, 1829)	<p style="margin-left: 40px;"><i>Campoplex canescens</i> Gravenhorst, 1829</p><p style="margin-left: 40px;"><i>frumentaria</i> (Rondani, 1874, <i>Campoplex</i>)</p><p style="margin-left: 40px;"><i>orientalis</i> (Schmiedeknecht, 1909, <i>Omorgus</i>)</p><p style="margin-left: 40px;"><i>compressa</i> (Hedwig, 1962, <i>Angitia</i>)</p>							England, Scotland, Ireland
300664	Animalia		Arthropoda			Insecta			Hymenoptera			Ichneumonoidea	Ichneumonidae	COLLYRIINAE									Cushman, 1924										Distribution data from Fitton (1984) and the collections of NMS.
300665	Animalia		Arthropoda			Insecta			Hymenoptera			Ichneumonoidea	Ichneumonidae	COLLYRIINAE			Collyria						Schiødte, 1839	<p style="margin-left: 40px;"><i>PACHYMERUS</i> Gravenhorst, 1829</p>
300666	Animalia		Arthropoda			Insecta			Hymenoptera			Ichneumonoidea	Ichneumonidae	COLLYRIINAE			Collyria		coxator				(Villers, 1789)	<p style="margin-left: 40px;"><i>Ichneumon coxator</i> Villers, 1789</p><p style="margin-left: 40px;"><i>?falcata</i> (Geoffroy, 1785, <i>Ichneumon</i>)</p><p style="margin-left: 40px;"><i>?arcuata</i> (Olivier, 1792, <i>Ichneumon</i>)</p><p style="margin-left: 40px;"><i>calcitrator</i> (Gravenhorst, 1807, <i>Bassus</i>)</p><p style="margin-left: 40px;"><i>puncticeps</i> (Thomson, 1877, <i>Pachym…							England
300667	Animalia		Arthropoda			Insecta			Hymenoptera			Ichneumonoidea	Ichneumonidae	COLLYRIINAE			Collyria		trichophthalma				(Thomson, 1877)	<p style="margin-left: 40px;"><i>Pachymerus trichophthalmus</i> Thomson, 1877</p>							England
300668	Animalia		Arthropoda			Insecta			Hymenoptera			Ichneumonoidea	Ichneumonidae	CREMASTINAE									Förster, 1869										Distribution data from Fitton &amp; Gauld (1980) and the collections of NMS and NHM.
300669	Animalia		Arthropoda			Insecta			Hymenoptera			Ichneumonoidea	Ichneumonidae	CREMASTINAE			Cremastus						Gravenhorst, 1829										species excluded from the British and Irish list by Fitton &amp; Gauld (1980): [crassicornis Thomson, 1890]
300670	Animalia		Arthropoda			Insecta			Hymenoptera			Ichneumonoidea	Ichneumonidae	CREMASTINAE			Cremastus		bellicosus				Gravenhorst, 1829	<p style="margin-left: 40px;"><i>partitus</i> Szépligeti, 1899</p><p style="margin-left: 40px;"><i>meridionator</i> Aubert, 1960</p>							England
300671	Animalia		Arthropoda			Insecta			Hymenoptera			Ichneumonoidea	Ichneumonidae	CREMASTINAE			Cremastus		cephalotes				Šedivý, 1970	<p style="margin-left: 40px;"><i>ponticus</i> Kolarov, 1982</p>							England
300672	Animalia		Arthropoda			Insecta			Hymenoptera			Ichneumonoidea	Ichneumonidae	CREMASTINAE			Cremastus		geminus				Gravenhorst, 1829	<p style="margin-left: 40px;"><i>areolaris</i> Strand, 1918</p>							England, Scotland, Wales, Ireland
300673	Animalia		Arthropoda			Insecta			Hymenoptera			Ichneumonoidea	Ichneumonidae	CREMASTINAE			Cremastus		infirmus				Gravenhorst, 1829	<p style="margin-left: 40px;"><i>filicaudis</i> Szépligeti, 1905</p>							England, Ireland
300674	Animalia		Arthropoda			Insecta			Hymenoptera			Ichneumonoidea	Ichneumonidae	CREMASTINAE			Cremastus		kratochvili				Šedivý, 1970								England		added by Fitton &amp; Gauld (1980)
300675	Animalia		Arthropoda			Insecta			Hymenoptera			Ichneumonoidea	Ichneumonidae	CREMASTINAE			Cremastus		pungens				Gravenhorst, 1829	<p style="margin-left: 40px;"><i>laeviusculus</i> Thomson, 1890</p>							England, Ireland
300676	Animalia		Arthropoda			Insecta			Hymenoptera			Ichneumonoidea	Ichneumonidae	CREMASTINAE			Cremastus		spectator				Gravenhorst, 1829	<p style="margin-left: 40px;"><i>binotatus</i> Gravenhorst, 1829</p><p style="margin-left: 40px;"><i>melanarius</i> Szépligeti, 1901</p>							England, Wales, Ireland
300677	Animalia		Arthropoda			Insecta			Hymenoptera			Ichneumonoidea	Ichneumonidae	CREMASTINAE			Dimophora						Förster, 1869	<p style="margin-left: 40px;"><i>DIMOPHORUS</i> Thomson, 1889</p>
300678	Animalia		Arthropoda			Insecta			Hymenoptera			Ichneumonoidea	Ichneumonidae	CREMASTINAE			Dimophora		nitens				(Gravenhorst, 1829)	<p style="margin-left: 40px;"><i>Campoplex nitens</i> Gravenhorst, 1829</p><p style="margin-left: 40px;"><i>robusta</i> Brischke, 1880</p><p style="margin-left: 40px;"><i>similis</i> Brischke, 1880</p><p style="margin-left: 40px;"><i>arenicola</i> (Thomson, 1890, <i>Dimophorus</i>)</p>							England
300679	Animalia		Arthropoda			Insecta			Hymenoptera			Ichneumonoidea	Ichneumonidae	CREMASTINAE			Pristomerus						Curtis, 1836
300680	Animalia		Arthropoda			Insecta			Hymenoptera			Ichneumonoidea	Ichneumonidae	CREMASTINAE			Pristomerus		armatus				(Lucas, 1849)	<p style="margin-left: 40px;"><i>Collyria armata</i> Lucas, 1849</p><p style="margin-left: 40px;"><i>glandarius</i> (Rondani, 1877, <i>Odontomerus</i>)</p><p style="margin-left: 40px;"><i>gratiosus</i> Tosquinet, 1896</p><p style="margin-left: 40px;"><i>cingulatus</i> Szépligeti, 1905</p>							England		NMS, det. Shaw &amp; Narolsky, added here
300681	Animalia		Arthropoda			Insecta			Hymenoptera			Ichneumonoidea	Ichneumonidae	CREMASTINAE			Pristomerus		horribilis				Narolsky, 1987								England		NHM, det. Broad, added here
300682	Animalia		Arthropoda			Insecta			Hymenoptera			Ichneumonoidea	Ichneumonidae	CREMASTINAE			Pristomerus		vulnerator				(Panzer, 1799)	<p style="margin-left: 40px;"><i>Ichneumon vulnerator</i> Panzer, 1799</p><p style="margin-left: 40px;"><i>marginalis</i> Habermehl, 1923</p><p style="margin-left: 40px;"><i>stigmaticus</i> Hellén, 1949</p>							England, Ireland
300683	Animalia		Arthropoda			Insecta			Hymenoptera			Ichneumonoidea	Ichneumonidae	CREMASTINAE			Temelucha						Förster, 1869	<p style="margin-left: 40px;"><i>PARACREMASTUS</i> Szépligeti, 1899</p>									species excluded from the British and Irish list by Fitton &amp; Gauld (1980): [decorata (Gravenhorst, 1829, Cremastus)] [subnasuta (Thomson, 1890, Cremastus)]
300684	Animalia		Arthropoda			Insecta			Hymenoptera			Ichneumonoidea	Ichneumonidae	CREMASTINAE			Temelucha		arenosa				(Szépligeti, 1899)	<p style="margin-left: 40px;"><i>Cremastus arenosus</i> Szépligeti, 1899</p>							England, Ireland		added by Fitton &amp; Gauld (1980)
300685	Animalia		Arthropoda			Insecta			Hymenoptera			Ichneumonoidea	Ichneumonidae	CREMASTINAE			Temelucha		interruptor				(Gravenhorst, 1829)	<p style="margin-left: 40px;"><i>Cremastus interruptor</i> Gravenhorst, 1829</p><p style="margin-left: 40px;"><i>buoliana</i> (Curtis, 1854, <i>Cremastus</i>)</p>							England
300686	Animalia		Arthropoda			Insecta			Hymenoptera			Ichneumonoidea	Ichneumonidae	CREMASTINAE			Temelucha		ophthalmica				(Holmgren, 1860)	<p style="margin-left: 40px;"><i>Cremastus ophthalmicus</i> Holmgren, 1860</p>							England		added by Fitton &amp; Gauld (1980)
300687	Animalia		Arthropoda			Insecta			Hymenoptera			Ichneumonoidea	Ichneumonidae	CREMASTINAE			Temelucha		signata				(Holmgren, 1860)	<p style="margin-left: 40px;"><i>Cremastus signatus</i> Holmgren, 1860</p>							England, Ireland		added by Fitton &amp; Gauld (1980)
300688	Animalia		Arthropoda			Insecta			Hymenoptera			Ichneumonoidea	Ichneumonidae	CRYPTINAE									Kirby, 1837	<p style="margin-left: 40px;"><i>PHYGADEUONTINAE</i> Förster, 1869</p><p style="margin-left: 40px;"><i>GELINAE</i> Viereck, 1918</p><p style="margin-left: 40px;"><i>HEMITELINAE</i> Förster, 1869</p>
300689	Animalia		Arthropoda			Insecta			Hymenoptera			Ichneumonoidea	Ichneumonidae	CRYPTINAE	CRYPTINI								Kirby, 1837	<p style="margin-left: 40px;"><i>MESOSTENINI</i> Ashmead, 1900</p><p style="margin-left: 40px;"><i>ECHTHRINI</i> Narayanan &amp; Kundanlal, 1958</p>									Unless noted otherwise, distribution data from Schwarz &amp; Shaw (1998) and the collections of NHM and UM, with further references given.
300690	Animalia		Arthropoda			Insecta			Hymenoptera			Ichneumonoidea	Ichneumonidae	CRYPTINAE	CRYPTINI		Acroricnus						Ratzeburg, 1852	<p style="margin-left: 40px;"><i>XENODOCON</i> Förster, 1855</p><p style="margin-left: 40px;"><i>MACROBATUS</i> Holmgren, 1856</p><p style="margin-left: 40px;"><i>LINOCERAS</i> Taschenberg, 1865</p><p style="margin-left: 40px;"><i>LEPTOBATIDES</i> Buysson, 1896</p>
300691	Animalia		Arthropoda			Insecta			Hymenoptera			Ichneumonoidea	Ichneumonidae	CRYPTINAE	CRYPTINI		Acroricnus		stylator				(Thunberg, 1824)	<p style="margin-left: 40px;"><i>Ichneumon stylator</i> Thunberg, 1824</p><p style="margin-left: 40px;"><i>macrobatus</i> (Gravenhorst, 1829, <i>Cryptus</i>)</p><p style="margin-left: 40px;"><i>schaumii</i> Ratzeburg, 1852</p><p style="margin-left: 40px;"><i>clavator</i> (Holmgren, 1856, <i>Macrobatus</i>)</p><p style="margin-left: 40px;"><i>exannulatus</i> (Kriechbaumer, 1894, <i>Linoceras</i>)<…							England, Ireland
300692	Animalia		Arthropoda			Insecta			Hymenoptera			Ichneumonoidea	Ichneumonidae	CRYPTINAE	CRYPTINI		Agrothereutes						Förster, 1850	<p style="margin-left: 40px;"><i>SPILOCRYPTUS</i> Thomson, 1873</p>
300693	Animalia		Arthropoda			Insecta			Hymenoptera			Ichneumonoidea	Ichneumonidae	CRYPTINAE	CRYPTINI		Agrothereutes		abbreviatus				(Fabricius, 1794)	<p style="margin-left: 40px;"><i>Ichneumon abbreviatus</i> Fabricius, 1794</p><p style="margin-left: 40px;"><i>abbreviator</i> (Fabricius, 1793, <i>Ichneumon</i>)</p><p style="margin-left: 40px;"><i>abbreviator</i> (Fabricius, 1798, <i>Ichneumon</i>)</p><p style="margin-left: 40px;"><i>breviator</i> (Thunberg, 1824, <i>Ichneumon</i>)</p><p style="margin-left: 40px;"><i>marginellus</i> (Gravenhors…							England, Wales, Ireland, Isle of Man		Schwarz &amp; Shaw (1998) separately list the distributions of three forms of abbreviatus, f. brevipennis (Marshall, 1867, Cryptus) (syn. batavus Vollenhoven, 1873), f. hopei (Gravenhorst, 1829, Pezomachus) and f. incubitor (Gravenhorst, 1829, Cryptus).
300694	Animalia		Arthropoda			Insecta			Hymenoptera			Ichneumonoidea	Ichneumonidae	CRYPTINAE	CRYPTINI		Agrothereutes		adustus				(Gravenhorst, 1829)	<p style="margin-left: 40px;"><i>Cryptus adustus</i> Gravenhorst, 1829</p><p style="margin-left: 40px;"><i>albolineatus</i> (Gravenhorst, 1829, <i>Cryptus</i>)</p><p style="margin-left: 40px;"><i>nubeculatus</i> (Gravenhorst, 1829, <i>Cryptus</i>)</p><p style="margin-left: 40px;"><i>opisoleucus</i> (Gravenhorst, 1829, <i>Cryptus</i>)</p><p style="margin-left: 40px;"><i>leucostictus</i> (Hartig, 1…
300695	Animalia		Arthropoda			Insecta			Hymenoptera			Ichneumonoidea	Ichneumonidae	CRYPTINAE	CRYPTINI		Agrothereutes		aterrimus				(Gravenhorst, 1829)	<p style="margin-left: 40px;"><i>Cryptus aterrimus</i> Gravenhorst, 1829</p><p style="margin-left: 40px;"><i>bicingulatus</i> (Gravenhorst, 1829, <i>Cryptus</i>)</p>
300696	Animalia		Arthropoda			Insecta			Hymenoptera			Ichneumonoidea	Ichneumonidae	CRYPTINAE	CRYPTINI		Agrothereutes		fumipennis				(Gravenhorst, 1829)	<p style="margin-left: 40px;"><i>Cryptus fumipennis</i> Gravenhorst, 1829</p><p style="margin-left: 40px;"><i>zygaenarum</i> (Thomson, 1873, <i>Spilocryptus</i>)</p><p style="margin-left: 40px;"><i>hymotomadum</i> (Rudow, 1883, <i>Cryptus</i>)</p><p style="margin-left: 40px;"><i>nigricans</i> (Kiss, 1915, <i>Spilocryptus</i>)</p><p style="margin-left: 40px;"><i>gracilentus</i> (Habermehl, 1929, <…							England, Wales
300697	Animalia		Arthropoda			Insecta			Hymenoptera			Ichneumonoidea	Ichneumonidae	CRYPTINAE	CRYPTINI		Agrothereutes		hospes				(Tschek, 1871)	<p style="margin-left: 40px;"><i>Cryptus hospes</i> Tschek, 1871</p><p style="margin-left: 40px;"><i>solitarius</i> (Tschek, 1871, <i>Cryptus</i>)</p><p style="margin-left: 40px;"><i>intermedius</i> (Verhoeff, 1890, <i>Cryptus</i>)</p>
300698	Animalia		Arthropoda			Insecta			Hymenoptera			Ichneumonoidea	Ichneumonidae	CRYPTINAE	CRYPTINI		Agrothereutes		leucorhaeus				(Donovan, 1810)	<p style="margin-left: 40px;"><i>Ichneumon leucorhaeus</i> Donovan, 1810</p><p style="margin-left: 40px;"><i>migrator</i> misident.</p><p style="margin-left: 40px;"><i>bombycis</i> (Boudier, 1836, <i>Cryptus</i>)</p><p style="margin-left: 40px;"><i>?tibialis</i> (Thomson, 1873, <i>Spilocryptus</i>)</p><p style="margin-left: 40px;"><i>temporalis</i> (Szépligeti, 1916, <i>Gambrus</i>)</p>							England, Scotland
300699	Animalia		Arthropoda			Insecta			Hymenoptera			Ichneumonoidea	Ichneumonidae	CRYPTINAE	CRYPTINI		Agrothereutes		mandator				(Linnaeus, 1758)	<p style="margin-left: 40px;"><i>Ichneumon mandator</i> Linnaeus, 1758</p><p style="margin-left: 40px;"><i>ischioleucus</i> (Gravenhorst, 1829, <i>Cryptus</i>)</p><p style="margin-left: 40px;"><i>cimbicis</i> (Tschek, 1871, <i>Cryptus</i>)</p>							England, Scotland
300700	Animalia		Arthropoda			Insecta			Hymenoptera			Ichneumonoidea	Ichneumonidae	CRYPTINAE	CRYPTINI		Agrothereutes		mansuetor				(Tschek, 1871)	<p style="margin-left: 40px;"><i>Cryptus mansuetor</i> Tschek, 1871</p><p style="margin-left: 40px;"><i>nasutus</i> (Thomson, 1873, <i>Spilocryptus</i>)</p><p style="margin-left: 40px;"><i>curiosus</i> (Szépligeti, 1916, <i>Gambrus</i>)</p>							Scotland		added by Schwarz &amp; Shaw (1998)
300701	Animalia		Arthropoda			Insecta			Hymenoptera			Ichneumonoidea	Ichneumonidae	CRYPTINAE	CRYPTINI		Agrothereutes		saturniae				(Boie, 1855)	<p style="margin-left: 40px;"><i>Cryptus saturniae</i> Boie, 1855</p><p style="margin-left: 40px;"><i>pavoniae</i> (Bauer, 1937, <i>Spilocryptus</i>)</p>							England, Scotland, Ireland
300702	Animalia		Arthropoda			Insecta			Hymenoptera			Ichneumonoidea	Ichneumonidae	CRYPTINAE	CRYPTINI		Apsilops						Förster, 1869	<p style="margin-left: 40px;"><i>DAPANUS</i> Förster, 1869</p><p style="margin-left: 40px;"><i>HETEROTYPUS</i> Förster, 1869</p><p style="margin-left: 40px;"><i>SOBAS</i> Förster, 1869</p><p style="margin-left: 40px;"><i>TRICHOCRYPTUS</i> Thomson, 1873</p>
300703	Animalia		Arthropoda			Insecta			Hymenoptera			Ichneumonoidea	Ichneumonidae	CRYPTINAE	CRYPTINI		Apsilops		aquaticus				(Thomson, 1874)	<p style="margin-left: 40px;"><i>Trichocrytus aquaticus</i> Thomson, 1874</p><p style="margin-left: 40px;"><i>napiformis</i> (Rudow, 1882, <i>Cryptus</i>)</p>							England
300704	Animalia		Arthropoda			Insecta			Hymenoptera			Ichneumonoidea	Ichneumonidae	CRYPTINAE	CRYPTINI		Apsilops		cinctorius				(Fabricius, 1775)	<p style="margin-left: 40px;"><i>Ichneumon cinctorius</i> Fabricius, 1775</p><p style="margin-left: 40px;"><i>scirpi</i> (Geoffroy, 1785, <i>Ichneumon</i>)</p><p style="margin-left: 40px;"><i>spinuosus</i> (Rudow, 1886, <i>Phygadeuon</i>)</p>							England, Wales
300705	Animalia		Arthropoda			Insecta			Hymenoptera			Ichneumonoidea	Ichneumonidae	CRYPTINAE	CRYPTINI		Aritranis						Förster, 1869	<p style="margin-left: 40px;"><i>PYCNOCRYPTUS</i> Thomson, 1873</p>									Schwarz &amp; Shaw (1998) clarified the uses of the generic names Aritranis, Hoplocryptus and Pycnocryptus.
300706	Animalia		Arthropoda			Insecta			Hymenoptera			Ichneumonoidea	Ichneumonidae	CRYPTINAE	CRYPTINI		Aritranis		director				(Thunberg, 1824)	<p style="margin-left: 40px;"><i>Ichneumon director</i> Thunberg, 1824</p><p style="margin-left: 40px;"><i>peregrinator</i> misident.</p>							England, Scotland, Wales, Ireland, Isle of Man
300707	Animalia		Arthropoda			Insecta			Hymenoptera			Ichneumonoidea	Ichneumonidae	CRYPTINAE	CRYPTINI		Aritranis		nigripes				(Gravenhorst, 1829)	<p style="margin-left: 40px;"><i>Cryptus nigripes</i> Gravenhorst, 1829</p><p style="margin-left: 40px;"><i>fuscomarginatus</i> (Gravenhorst, 1829, <i>Cryptus</i>)</p><p style="margin-left: 40px;"><i>insectator</i> (Tschek, 1871, <i>Cryptus</i>)</p><p style="margin-left: 40px;"><i>jonicus</i> (Tschek, 1872, <i>Cryptus</i>)</p>							England
300708	Animalia		Arthropoda			Insecta			Hymenoptera			Ichneumonoidea	Ichneumonidae	CRYPTINAE	CRYPTINI		Aritranis		occisor				(Gravenhorst, 1829)	<p style="margin-left: 40px;"><i>Cryptus occisor</i> Gravenhorst, 1829</p><p style="margin-left: 40px;"><i>gracilis</i> (Taschenberg, 1865, <i>Cryptus</i>)</p><p style="margin-left: 40px;"><i>fuscicornis</i> (Tschek, 1871, <i>Cryptus</i>)</p><p style="margin-left: 40px;"><i>notabilis</i> (Habermehl, 1926, <i>Hoplocryptus</i>)</p><p style="margin-left: 40px;"><i>punguri</i> (Kiss, 1915, <i>Spilocr…									Listed as a valid species by Yu &amp; Horstmann (1997), as a synonym of nigripes by Schwarz &amp; Shaw (1998) and then taken out of synonymy with nigripes by Sawoniewicz (2003) and treated as a valid species, with revised synonymy of both species, by Schwarz (2005).
300709	Animalia		Arthropoda			Insecta			Hymenoptera			Ichneumonoidea	Ichneumonidae	CRYPTINAE	CRYPTINI		Ateleute						Förster, 1869	<p style="margin-left: 40px;"><i>ATELEUTA</i> 0</p>
300710	Animalia		Arthropoda			Insecta			Hymenoptera			Ichneumonoidea	Ichneumonidae	CRYPTINAE	CRYPTINI		Ateleute		linearis				Förster, 1871	<p style="margin-left: 40px;"><i>lissonotoides</i> (Thomson, 1885, <i>Hemiteles</i>)</p><p style="margin-left: 40px;"><i>egregia</i> (Schmiedeknecht, 1933, <i>Hemiteles</i>)</p>							England		added by Schwarz &amp; Shaw (1998)
300711	Animalia		Arthropoda			Insecta			Hymenoptera			Ichneumonoidea	Ichneumonidae	CRYPTINAE	CRYPTINI		Buathra						Cameron, 1903
300712	Animalia		Arthropoda			Insecta			Hymenoptera			Ichneumonoidea	Ichneumonidae	CRYPTINAE	CRYPTINI		Buathra		laborator				(Thunberg, 1824)	<p style="margin-left: 40px;"><i>Ichneumon laborator</i> Thunberg, 1824</p><p style="margin-left: 40px;"><i>fabricii</i> (Schiødte, 1839, <i>Cryptus</i>)</p><p style="margin-left: 40px;"><i>fulvipes</i> (Magretti, 1884, <i>Cryptus</i>)</p><p style="margin-left: 40px;"><i>fulvipes</i> (Habermehl, 1902, <i>Cryptus</i>)</p>							England, Scotland, Wales
300713	Animalia		Arthropoda			Insecta			Hymenoptera			Ichneumonoidea	Ichneumonidae	CRYPTINAE	CRYPTINI		Buathra		tarsoleuca				(Schrank, 1781)	<p style="margin-left: 40px;"><i>Ichneumon tarsoleucos</i> Schrank, 1781</p><p style="margin-left: 40px;"><i>leucopus</i> (Gmelin, 1790, <i>Ichneumon</i>)</p><p style="margin-left: 40px;"><i>leucotarsos</i> (Gmelin, 1790, <i>Ichneumon</i>)</p><p style="margin-left: 40px;"><i>curvicauda</i> (Thomson, 1896, <i>Cryptus</i>)</p>							England, Scotland
300714	Animalia		Arthropoda			Insecta			Hymenoptera			Ichneumonoidea	Ichneumonidae	CRYPTINAE	CRYPTINI		Caenocryptus						Thomson, 1873
300715	Animalia		Arthropoda			Insecta			Hymenoptera			Ichneumonoidea	Ichneumonidae	CRYPTINAE	CRYPTINI		Caenocryptus		rufiventris				(Gravenhorst, 1829)	<p style="margin-left: 40px;"><i>Cryptus rufiventris</i> Gravenhorst, 1829</p><p style="margin-left: 40px;"><i>eborinus</i> (Ratzeburg, 1852, <i>Cryptus</i>)</p><p style="margin-left: 40px;"><i>collaris</i> (Rudow, 1883, <i>Cryptus</i>)</p>							England, Scotland		British specimens belong to the subspecies impunctatus Schwarz, 1991 (Schwarz &amp; Shaw, 1998).
300716	Animalia		Arthropoda			Insecta			Hymenoptera			Ichneumonoidea	Ichneumonidae	CRYPTINAE	CRYPTINI		Cryptus						Fabricius, 1804	<p style="margin-left: 40px;"><i>EUCRYPTUS</i> Haldeman, 1842</p><p style="margin-left: 40px;"><i>ITAMOPLEX</i> Förster, 1869</p>
300717	Animalia		Arthropoda			Insecta			Hymenoptera			Ichneumonoidea	Ichneumonidae	CRYPTINAE	CRYPTINI		Cryptus		apparitorius				(Villers, 1789)	<p style="margin-left: 40px;"><i>Ichneumon apparitorius</i> Villers, 1789</p><p style="margin-left: 40px;"><i>pungens</i> Gravenhorst, 1829</p><p style="margin-left: 40px;"><i>gratiosus</i> Tschek, 1871</p><p style="margin-left: 40px;"><i>histrionicus</i> Rudow, 1882</p>
300718	Animalia		Arthropoda			Insecta			Hymenoptera			Ichneumonoidea	Ichneumonidae	CRYPTINAE	CRYPTINI		Cryptus		arenicola				Thomson, 1873								England		added by Schwarz (2005); identified by Schwarz (2005) as Cryptus macellus Tschek, 1871 with arenicola synonymised under macellus but later Schwarz (2015) raised arenicola from synonymy and confirmed that British specimens are arenicola.
300719	Animalia		Arthropoda			Insecta			Hymenoptera			Ichneumonoidea	Ichneumonidae	CRYPTINAE	CRYPTINI		Cryptus		armator				Fabricius, 1804	<p style="margin-left: 40px;"><i>albatorius</i> misident.</p><p style="margin-left: 40px;"><i>cunctator</i> (Fabricius, 1793, <i>Ichneumon</i>)</p><p style="margin-left: 40px;"><i>rusticator</i> Zetterstedt, 1838</p><p style="margin-left: 40px;"><i>filicornis</i> Rudow, 1886</p>							England, Scotland, Wales
300720	Animalia		Arthropoda			Insecta			Hymenoptera			Ichneumonoidea	Ichneumonidae	CRYPTINAE	CRYPTINI		Cryptus		dianae				Gravenhorst, 1829	<p style="margin-left: 40px;"><i>gracilicornis</i> Gravenhorst, 1829</p><p style="margin-left: 40px;"><i>leucostomus</i> Gravenhorst, 1829</p><p style="margin-left: 40px;"><i>stenogaster</i> Gravenhorst, 1829</p><p style="margin-left: 40px;"><i>seticornis</i> (Ratzeburg, 1844, <i>Ichneumon</i>)</p><p style="margin-left: 40px;"><i>bolivari</i> Kriechbaumer, 1898</p><p style="margin-left: 40px;"><i…							England
300721	Animalia		Arthropoda			Insecta			Hymenoptera			Ichneumonoidea	Ichneumonidae	CRYPTINAE	CRYPTINI		Cryptus		fibulatus				Gravenhorst, 1829	<p style="margin-left: 40px;"><i>rhenanus</i> Ulbricht, 1911</p><p style="margin-left: 40px;"><i>antennalis</i> Szépligeti, 1916</p>							Scotland, Wales, Ireland		added by Schwarz &amp; Shaw (1998)
300722	Animalia		Arthropoda			Insecta			Hymenoptera			Ichneumonoidea	Ichneumonidae	CRYPTINAE	CRYPTINI		Cryptus		inculcator				(Linnaeus, 1758)	<p style="margin-left: 40px;"><i>Ichneumon inculcator</i> Linnaeus, 1758</p><p style="margin-left: 40px;"><i>sponsor</i> (Fabricius, 1793, <i>Ichneumon</i>)</p><p style="margin-left: 40px;"><i>regenerator</i> (Panzer, 1804, <i>Ichneumon</i>)</p><p style="margin-left: 40px;"><i>quadrilineatus</i> Gravenhorst, 1829</p><p style="margin-left: 40px;"><i>filicornis</i> Ratzeburg, 1844</p><p style="marg…
300723	Animalia		Arthropoda			Insecta			Hymenoptera			Ichneumonoidea	Ichneumonidae	CRYPTINAE	CRYPTINI		Cryptus		minator				Gravenhorst, 1829
300724	Animalia		Arthropoda			Insecta			Hymenoptera			Ichneumonoidea	Ichneumonidae	CRYPTINAE	CRYPTINI		Cryptus		moschator				(Fabricius, 1787)	<p style="margin-left: 40px;"><i>Ichneumon moschator</i> Fabricius, 1787</p><p style="margin-left: 40px;"><i>polytropus</i> Heinrich, 1951</p>							England
300725	Animalia		Arthropoda			Insecta			Hymenoptera			Ichneumonoidea	Ichneumonidae	CRYPTINAE	CRYPTINI		Cryptus		obscuripes				Zetterstedt, 1838	<p style="margin-left: 40px;"><i>borealis</i> Thomson, 1873</p><p style="margin-left: 40px;"><i>carpathicus</i> Szépligeti, 1916</p>							England		NHM, det. Schwarz, added here
300726	Animalia		Arthropoda			Insecta			Hymenoptera			Ichneumonoidea	Ichneumonidae	CRYPTINAE	CRYPTINI		Cryptus		spinosus				Gravenhorst, 1829	<p style="margin-left: 40px;"><i>armatorius</i> misident.</p><p style="margin-left: 40px;"><i>leucostictus</i> Gravenhorst, 1829</p>							England
300727	Animalia		Arthropoda			Insecta			Hymenoptera			Ichneumonoidea	Ichneumonidae	CRYPTINAE	CRYPTINI		Cryptus		spiralis				(Geoffroy, 1785)	<p style="margin-left: 40px;"><i>Ichneumon spiralis</i> Geoffroy, 1785</p><p style="margin-left: 40px;"><i>inconspicuus</i> Gravenhorst, 1829</p><p style="margin-left: 40px;"><i>hispanicus</i> Habermehl, 1918</p>
300728	Animalia		Arthropoda			Insecta			Hymenoptera			Ichneumonoidea	Ichneumonidae	CRYPTINAE	CRYPTINI		Cryptus		titubator				(Thunberg, 1824)	<p style="margin-left: 40px;"><i>Ichneumon titubator</i> Thunberg, 1824</p><p style="margin-left: 40px;"><i>difficilis</i> Tschek, 1871</p><p style="margin-left: 40px;"><i>infumatus</i> Thomson, 1873</p>							England, Scotland, Wales, Ireland, Isle of Man
300729	Animalia		Arthropoda			Insecta			Hymenoptera			Ichneumonoidea	Ichneumonidae	CRYPTINAE	CRYPTINI		Cryptus		tuberculatus				Gravenhorst, 1829	<p style="margin-left: 40px;"><i>investigator</i> Tschek, 1871</p><p style="margin-left: 40px;"><i>solivagus</i> Rossem, 1989</p>							England
300730	Animalia		Arthropoda			Insecta			Hymenoptera			Ichneumonoidea	Ichneumonidae	CRYPTINAE	CRYPTINI		Cryptus		viduatorius				Fabricius, 1804	<p style="margin-left: 40px;"><i>germari</i> Taschenberg, 1865</p>							England, Scotland, Wales, Ireland
300731	Animalia		Arthropoda			Insecta			Hymenoptera			Ichneumonoidea	Ichneumonidae	CRYPTINAE	CRYPTINI		Echthrus						Gravenhorst, 1829	<p style="margin-left: 40px;"><i>SPHAETES</i> Bremi, 1849</p>									Echthrus is placed in the Cryptini, following Laurenne et al. (2006), rather than in the Hemigastrini, where it was placed by Townes (1969). Townes &amp; Townes (1960) had previously placed Echthrus in the Cryptini based on similarities to the genera that Townes (1970) classified as the subtribe Gabuniina. The molecular results of Laurenne et al. (2006) support this interpretation, in agreement w…
300732	Animalia		Arthropoda			Insecta			Hymenoptera			Ichneumonoidea	Ichneumonidae	CRYPTINAE	CRYPTINI		Echthrus		reluctator				(Linnaeus, 1758)	<p style="margin-left: 40px;"><i>Ichneumon reluctator</i> Linnaeus, 1758</p><p style="margin-left: 40px;"><i>usurpator</i> (Scopoli, 1763, <i>Ichneumon</i>)</p><p style="margin-left: 40px;"><i>obex</i> (Müller, 1776, <i>Ichneumon</i>)</p><p style="margin-left: 40px;"><i>rubiginosus</i> (Christ, 1791, <i>Ichneumon</i>)</p><p style="margin-left: 40px;"><i>carbonator</i> (Thunberg, 1824, <i>Ichneumo…							England
300733	Animalia		Arthropoda			Insecta			Hymenoptera			Ichneumonoidea	Ichneumonidae	CRYPTINAE	CRYPTINI		Enclisis						Townes, 1970
300734	Animalia		Arthropoda			Insecta			Hymenoptera			Ichneumonoidea	Ichneumonidae	CRYPTINAE	CRYPTINI		Enclisis		alpicola				(Habermehl, 1926)	<p style="margin-left: 40px;"><i>Caenocryptus alpicola</i> Habermehl, 1926</p>							England		added by Schwarz (1989); omitted from the British list by Schwarz &amp; Shaw (1998)
300735	Animalia		Arthropoda			Insecta			Hymenoptera			Ichneumonoidea	Ichneumonidae	CRYPTINAE	CRYPTINI		Enclisis		macilenta				(Gravenhorst, 1829)	<p style="margin-left: 40px;"><i>Cryptus macilentus</i> Gravenhorst, 1829</p><p style="margin-left: 40px;"><i>remex</i> (Tschek, 1871, <i>Cryptus</i>)</p><p style="margin-left: 40px;"><i>inflata</i> (Thomson, 1873, <i>Caenocryptus</i>)</p><p style="margin-left: 40px;"><i>gracilipes</i> (Gravenhorst, 1829, <i>Cryptus</i>)</p><p style="margin-left: 40px;"><i>antennata</i> (Bridgman, 1881, <i>Cryptu…							England, Wales
300736	Animalia		Arthropoda			Insecta			Hymenoptera			Ichneumonoidea	Ichneumonidae	CRYPTINAE	CRYPTINI		Enclisis		ruficeps				(Desvignes, 1856)	<p style="margin-left: 40px;"><i>Cryptus ruficeps</i> Desvignes, 1856</p><p style="margin-left: 40px;"><i>pulchella</i> Schwarz, 1989</p>
300737	Animalia		Arthropoda			Insecta			Hymenoptera			Ichneumonoidea	Ichneumonidae	CRYPTINAE	CRYPTINI		Enclisis		vindex				(Tschek, 1871)	<p style="margin-left: 40px;"><i>Cryptus vindex</i> Tschek, 1871</p><p style="margin-left: 40px;"><i>pubiventris</i> (Thomson, 1873, <i>Caenocryptus</i>)</p><p style="margin-left: 40px;"><i>tener</i> (Thomson, 1873, <i>Caenocryptus</i>)</p><p style="margin-left: 40px;"><i>nubifer</i> (Thomson, 1896, <i>Caenocryptus</i>)</p><p style="margin-left: 40px;"><i>striolata</i> (Thomson, 1896, <i>Caenocry…							England, Scotland
300738	Animalia		Arthropoda			Insecta			Hymenoptera			Ichneumonoidea	Ichneumonidae	CRYPTINAE	CRYPTINI		Gambrus						Förster, 1869	<p style="margin-left: 40px;"><i>KALTENBACHIA</i> Förster, 1869</p><p style="margin-left: 40px;"><i>HYGROCRYPTUS</i> Thomson, 1873</p>
300739	Animalia		Arthropoda			Insecta			Hymenoptera			Ichneumonoidea	Ichneumonidae	CRYPTINAE	CRYPTINI		Gambrus		amoenus				(Gravenhorst, 1829)	<p style="margin-left: 40px;"><i>Cryptus amoenus</i> Gravenhorst, 1829</p>
300740	Animalia		Arthropoda			Insecta			Hymenoptera			Ichneumonoidea	Ichneumonidae	CRYPTINAE	CRYPTINI		Gambrus		bipunctatus				(Tschek, 1872)	<p style="margin-left: 40px;"><i>Cryptus bipunctatus</i> Tschek, 1872</p><p style="margin-left: 40px;"><i>ornatus</i> misident.</p><p style="margin-left: 40px;"><i>maculatus</i> Brischke, 1888</p>							England, Scotland, Wales		added by Schwarz &amp; Shaw (1998); transferred from Aritranis by Schwarz &amp; Shaw (1998).
300741	Animalia		Arthropoda			Insecta			Hymenoptera			Ichneumonoidea	Ichneumonidae	CRYPTINAE	CRYPTINI		Gambrus		carnifex				(Gravenhorst, 1829)	<p style="margin-left: 40px;"><i>Cryptus carnifex</i> Gravenhorst, 1829</p><p style="margin-left: 40px;"><i>varicoxis</i> (Taschenberg, 1865, <i>Cryptus</i>)</p>							England, Scotland, Wales
300742	Animalia		Arthropoda			Insecta			Hymenoptera			Ichneumonoidea	Ichneumonidae	CRYPTINAE	CRYPTINI		Gambrus		incubitor				(Linnaeus, 1758)	<p style="margin-left: 40px;"><i>Ichneumon incubitor</i> Linnaeus, 1758</p><p style="margin-left: 40px;"><i>vibex</i> (Müller, 1776, <i>Ichneumon</i>)</p><p style="margin-left: 40px;"><i>upsaliensis</i> (Geoffroy, 1785, <i>Ichneumon</i>)</p><p style="margin-left: 40px;"><i>superus</i> Thomson, 1896</p><p style="margin-left: 40px;"><i>quadricinctus</i> (Strobl, 1901, <i>Spilocryptus</i>)</p><p sty…							England, Scotland		Schwarz &amp; Shaw (1998) recorded Gambrus incubitor (including ornatus) from England, Scotland and Wales but, following Schwarz’s (2005) separation of incubitor and ornatus, most specimens in NMS actually belong to ornatus (M. Schwarz, pers. comm.).
300743	Animalia		Arthropoda			Insecta			Hymenoptera			Ichneumonoidea	Ichneumonidae	CRYPTINAE	CRYPTINI		Gambrus		ornatus				(Gravenhorst, 1829)	<p style="margin-left: 40px;"><i>Cryptus ornatus</i> Gravenhorst, 1829</p><p style="margin-left: 40px;"><i>ornatulus</i> (Thomson, 1873, <i>Spilocryptus</i>)</p><p style="margin-left: 40px;"><i>inferus</i> Thomson, 1896</p><p style="margin-left: 40px;"><i>quadricinctus</i> (Strobl, 1901, <i>Spilocryptus</i>)</p><p style="margin-left: 40px;"><i>ruficoxis</i> Habermehl, 1919</p><p style="margin-lef…							England, Scotland, Wales, Ireland		added by Schwarz (2005); see note under incubitor. Irish occurrence confirmed by a specimen (coll. A. Anderson) identified by M. Schwarz. The species referred to as ornatus in older literature is now known to be bipunctatus (Schwarz &amp; Shaw, 1998).
300744	Animalia		Arthropoda			Insecta			Hymenoptera			Ichneumonoidea	Ichneumonidae	CRYPTINAE	CRYPTINI		Gambrus		tricolor				(Gravenhorst, 1829)	<p style="margin-left: 40px;"><i>Cryptus tricolor</i> Gravenhorst, 1829</p><p style="margin-left: 40px;"><i>subcinctus</i> (Gravenhorst, 1829, <i>Cryptus</i>)</p><p style="margin-left: 40px;"><i>opacus</i> Szépligeti, 1916</p>							England, Scotland, Wales		Listed as a species of Thrybius by Yu &amp; Horstmann (1997), Schwarz &amp; Shaw’s (1998) treatment is followed here.
300745	Animalia		Arthropoda			Insecta			Hymenoptera			Ichneumonoidea	Ichneumonidae	CRYPTINAE	CRYPTINI		Helcostizus						Förster, 1869	<p style="margin-left: 40px;"><i>BRACHYCENTRUS</i> Taschenberg, 1865</p><p style="margin-left: 40px;"><i>CYRTOCRYPTUS</i> Marshall, 1872</p><p style="margin-left: 40px;"><i>MESOCRYPTUS</i> Thomson, 1873</p><p style="margin-left: 40px;"><i>HETEROCRYPTUS</i> Woldstedt, 1874</p><p style="margin-left: 40px;"><i>CHENBERGUS</i> Navás, 1930</p>									Helcostizus is transferred here from the Phygadeuontini, following the molecular phylogenetic results of Laurenne et al. (2006). The combination of morphological characters associated with parasitising wood-boring hosts had previously led Townes &amp; Townes (1962) to classify this genus in the Cryptini. Distribution data from Townes (1983) and Schwarz &amp; Shaw (2010).
300746	Animalia		Arthropoda			Insecta			Hymenoptera			Ichneumonoidea	Ichneumonidae	CRYPTINAE	CRYPTINI		Helcostizus		restaurator				(Fabricius, 1775)	<p style="margin-left: 40px;"><i>Ichneumon restaurator</i> Fabricius, 1775</p><p style="margin-left: 40px;"><i>albator</i> (Thunberg, 1824, <i>Ichneumon</i>)</p><p style="margin-left: 40px;"><i>brachycentrus</i> (Gravenhorst, 1829, <i>Cryptus</i>)</p><p style="margin-left: 40px;"><i>crassipes</i> (Hartig, 1847, <i>Echthrus</i>)</p><p style="margin-left: 40px;"><i>hercynianus</i> (Hartig, 1847, <i…							England, Ireland
300747	Animalia		Arthropoda			Insecta			Hymenoptera			Ichneumonoidea	Ichneumonidae	CRYPTINAE	CRYPTINI		Hidryta						Förster, 1869	<p style="margin-left: 40px;"><i>BRACHYCRYPTUS</i> Thomson, 1873</p><p style="margin-left: 40px;"><i>EUTHYCRYPTUS</i> Jussel, 1907</p>
300748	Animalia		Arthropoda			Insecta			Hymenoptera			Ichneumonoidea	Ichneumonidae	CRYPTINAE	CRYPTINI		Hidryta		nigricoxa				(Provancher, 1888)	<p style="margin-left: 40px;"><i>Cryptus nigricoxus</i> Provancher, 1888</p><p style="margin-left: 40px;"><i>scrobiculifer</i> (Jussel, 1907, <i>Euthycryptus</i>)</p>							Wales		added by Schwarz &amp; Shaw (1998)
300749	Animalia		Arthropoda			Insecta			Hymenoptera			Ichneumonoidea	Ichneumonidae	CRYPTINAE	CRYPTINI		Hidryta		sordida				(Tschek, 1871)	<p style="margin-left: 40px;"><i>Cryptus sordidus</i> Tschek, 1871</p><p style="margin-left: 40px;"><i>melanopus</i> (Taschenberg, 1865, <i>Cryptus</i>)</p><p style="margin-left: 40px;"><i>erythrocera</i> (Thomson, 1873, <i>Brachycryptus</i>)</p><p style="margin-left: 40px;"><i>sordidula</i> (Thomson, 1873, <i>Brachycryptus</i>)</p><p style="margin-left: 40px;"><i>hueberi</i> (Dalla Torre, 1901, …							England, Scotland, Wales, Ireland		added by Edgar (1971); overlooked by Fitton (1978) and thus omitted from the British list (Schwarz &amp; Shaw, 1998).
300750	Animalia		Arthropoda			Insecta			Hymenoptera			Ichneumonoidea	Ichneumonidae	CRYPTINAE	CRYPTINI		Hoplocryptus						Thomson, 1873
300751	Animalia		Arthropoda			Insecta			Hymenoptera			Ichneumonoidea	Ichneumonidae	CRYPTINAE	CRYPTINI		Hoplocryptus		bellosus				(Curtis, 1837)	<p style="margin-left: 40px;"><i>Cryptus bellosus</i> Curtis, 1837</p><p style="margin-left: 40px;"><i>signatorius</i> (Fabricius, 1793, <i>Ichneumon</i>)</p><p style="margin-left: 40px;"><i>pulcher</i> Thomson, 1873</p><p style="margin-left: 40px;"><i>fuscipes</i> (Tschek, 1871, <i>Cryptus</i>)</p><p style="margin-left: 40px;"><i>thoracicus</i> (Brischke, 1881, <i>Hygrocryptus</i>)</p><p style="…							England, Ireland
300752	Animalia		Arthropoda			Insecta			Hymenoptera			Ichneumonoidea	Ichneumonidae	CRYPTINAE	CRYPTINI		Hoplocryptus		bohemani				(Holmgren, 1856)	<p style="margin-left: 40px;"><i>Cryptus bohemani</i> Holmgren, 1856</p><p style="margin-left: 40px;"><i>rufoniger</i> (Desvignes, 1856, <i>Cryptus</i>)</p><p style="margin-left: 40px;"><i>mesoxanthus</i> Thomson, 1873</p>
300753	Animalia		Arthropoda			Insecta			Hymenoptera			Ichneumonoidea	Ichneumonidae	CRYPTINAE	CRYPTINI		Hoplocryptus		confector				(Gravenhorst, 1829)	<p style="margin-left: 40px;"><i>Cryptus confector</i> Gravenhorst, 1829</p><p style="margin-left: 40px;"><i>albus</i> (Taschenberg, 1865, <i>Cryptus</i>)</p><p style="margin-left: 40px;"><i>brachysoma</i> (Taschenberg, 1865, <i>Cryptus</i>)</p><p style="margin-left: 40px;"><i>dubius</i> (Taschenberg, 1865, <i>Cryptus</i>)</p><p style="margin-left: 40px;"><i>elegans</i> Thomson, 1873</p><p style=…							England
300754	Animalia		Arthropoda			Insecta			Hymenoptera			Ichneumonoidea	Ichneumonidae	CRYPTINAE	CRYPTINI		Hoplocryptus		melanocephalus				(Gravenhorst, 1829)	<p style="margin-left: 40px;"><i></i> </p>							England		added by Schwarz (2007)
300755	Animalia		Arthropoda			Insecta			Hymenoptera			Ichneumonoidea	Ichneumonidae	CRYPTINAE	CRYPTINI		Hoplocryptus		murarius				(Börner, 1782)	<p style="margin-left: 40px;"><i>Ichneumon murarius</i> Börner, 1782</p><p style="margin-left: 40px;"><i>olitorius</i> (Fabricius, 1793, <i>Ichneumon</i>)</p><p style="margin-left: 40px;"><i>fugitivus</i> (Gravenhorst, 1829, <i>Cryptus</i>)</p><p style="margin-left: 40px;"><i>gracilis</i> (Gravenhorst, 1829, <i>Cryptus</i>)</p><p style="margin-left: 40px;"><i>binotatulus</i> Thomson, 1873</p><p s…									Ichneumon murarius has priority over fugitivus (as used by Schwarz &amp; Shaw, 1998) or olitorius; Hoplocryptus binotatulus f. grandis Habermehl, 1926 was removed from synonymy and is a junior synonym of the extralimital H. besseianus (Seyrig, 1926) (Schwarz, 2007).
300756	Animalia		Arthropoda			Insecta			Hymenoptera			Ichneumonoidea	Ichneumonidae	CRYPTINAE	CRYPTINI		Hoplocryptus		quadriguttatus				(Gravenhorst, 1829)	<p style="margin-left: 40px;"><i>Cryptus quadriguttatus</i> Gravenhorst, 1829</p><p style="margin-left: 40px;"><i>cognatus</i> (Fonscolombe, 1850, <i>Cryptus</i>)</p><p style="margin-left: 40px;"><i>mallorcanus</i> Kriechbaumer, 1894</p><p style="margin-left: 40px;"><i>enslini</i> Habermehl, 1921</p><p style="margin-left: 40px;"><i>hebraicator</i> (Aubert, 1970, <i>Aritranis</i>)</p><p style="mar…							England
300757	Animalia		Arthropoda			Insecta			Hymenoptera			Ichneumonoidea	Ichneumonidae	CRYPTINAE	CRYPTINI		Idiolispa						Förster, 1869	<p style="margin-left: 40px;"><i>LIOCRYPTUS</i> Thomson, 1873</p><p style="margin-left: 40px;"><i>PARACRYPTUS</i> Szépligeti, 1916</p>									species of Idiolispa deleted from the British and Irish list by Schwarz &amp; Shaw (1998): [obfuscator (Villers, 1789, Ichneumon)] Fitton (1978) listed obfuscator (Villers) as a doubtfully placed species of Trychosis but it was probably misidentified.
300758	Animalia		Arthropoda			Insecta			Hymenoptera			Ichneumonoidea	Ichneumonidae	CRYPTINAE	CRYPTINI		Idiolispa		analis				(Gravenhorst, 1807)	<p style="margin-left: 40px;"><i>Bassus analis</i> Gravenhorst, 1807</p><p style="margin-left: 40px;"><i>cursor</i> (Thunberg, 1824, <i>Ichneumon</i>)</p><p style="margin-left: 40px;"><i>elevata</i> (Zetterstedt, 1838, <i>Cryptus</i>)</p><p style="margin-left: 40px;"><i>dubiosa</i> (Kiss, 1924, <i>Spilocryptus</i>)</p>							England, Scotland, Wales, Ireland
300759	Animalia		Arthropoda			Insecta			Hymenoptera			Ichneumonoidea	Ichneumonidae	CRYPTINAE	CRYPTINI		Idiolispa		?hungarica				(Szépligeti, 1916)	<p style="margin-left: 40px;"><i>Paracryptus hungaricus</i> Szépligeti, 1916</p><p style="margin-left: 40px;"><i>?grossa</i> misident.</p><p style="margin-left: 40px;"><i>meyeri</i> (Habermehl, 1926, <i>Spilocryptus</i>)</p>									Status as a British species (listed as Agrothereutes grossus (Grav.) by Fitton, 1978) regarded as tentative by Schwarz &amp; Shaw (1998).
300760	Animalia		Arthropoda			Insecta			Hymenoptera			Ichneumonoidea	Ichneumonidae	CRYPTINAE	CRYPTINI		Idiolispa		subalpina				(Schmiedeknecht, 1904)	<p style="margin-left: 40px;"><i>Spilocryptus subalpinus</i> Schmiedeknecht, 1904</p><p style="margin-left: 40px;"><i>heydeni</i> (Habermehl, 1919, <i>Spilocryptus</i>)</p>							Scotland		added by Schwarz &amp; Shaw (1998)
300761	Animalia		Arthropoda			Insecta			Hymenoptera			Ichneumonoidea	Ichneumonidae	CRYPTINAE	CRYPTINI		Ischnus						Gravenhorst, 1829	<p style="margin-left: 40px;"><i>HABROCRYPTUS</i> Thomson, 1873</p>
300762	Animalia		Arthropoda			Insecta			Hymenoptera			Ichneumonoidea	Ichneumonidae	CRYPTINAE	CRYPTINI		Ischnus		agitator				(Olivier, 1792)	<p style="margin-left: 40px;"><i>Ichneumon agitator</i> Olivier, 1792</p><p style="margin-left: 40px;"><i>destructorius</i> (Fabricius, 1793, <i>Ichneumon</i>)</p><p style="margin-left: 40px;"><i>rubricator</i> (Panzer, 1801, <i>Ichneumon</i>)</p><p style="margin-left: 40px;"><i>constrictor</i> (Fabricius, 1804, <i>Cryptus</i>)</p><p style="margin-left: 40px;"><i>minutorius</i> (Fabricius, 1804, …
300763	Animalia		Arthropoda			Insecta			Hymenoptera			Ichneumonoidea	Ichneumonidae	CRYPTINAE	CRYPTINI		Ischnus		alternator				(Gravenhorst, 1829)	<p style="margin-left: 40px;"><i>Cryptus alternator</i> Gravenhorst, 1829</p><p style="margin-left: 40px;"><i>unicinctus</i> (Gravenhorst, 1829, <i>Cryptus</i>)</p><p style="margin-left: 40px;"><i>striatellus</i> (Zetterstedt, 1838, <i>Cryptus</i>)</p><p style="margin-left: 40px;"><i>annulipes</i> (Taschenberg, 1865, <i>Cryptus</i>)</p><p style="margin-left: 40px;"><i>annulitarsis</i> (Rudow, 188…							England, Scotland, Wales
300764	Animalia		Arthropoda			Insecta			Hymenoptera			Ichneumonoidea	Ichneumonidae	CRYPTINAE	CRYPTINI		Ischnus		inquisitorius				(Müller, 1776)	<p style="margin-left: 40px;"><i>Ichneumon inquisitorius</i> Müller, 1776</p><p style="margin-left: 40px;"><i>migrator</i> misident.</p><p style="margin-left: 40px;"><i>dictator</i> (Geoffroy, 1785, <i>Ichneumon</i>)</p><p style="margin-left: 40px;"><i>porrectorius</i> (Fabricius, 1787, <i>Ichneumon</i>)</p><p style="margin-left: 40px;"><i>leucostictos</i> (Gmelin, 1790, <i>Ichneumon</i>)</p><p s…							England		Horstmann (1968) misidentified Fabricius’s migrator, a mistake followed by Schwarz &amp; Shaw (1998). Horstmann’s subsequent (2001b) lectotype designations resulted in inquisitorius becoming the valid name for migrator sensu Horstmann (1968) and Schwarz &amp; Shaw (1998) and migrator being the senior synonym for collaris. Sawoniewicz (2003) correctly applied the names (Horstmann, pers. comm.).
300765	Animalia		Arthropoda			Insecta			Hymenoptera			Ichneumonoidea	Ichneumonidae	CRYPTINAE	CRYPTINI		Ischnus		migrator				(Fabricius, 1775)	<p style="margin-left: 40px;"><i>Ichneumon migrator</i> Fabricius, 1775</p><p style="margin-left: 40px;"><i>collaris</i> (Tschek, 1872, <i>Cryptus</i>)</p><p style="margin-left: 40px;"><i>punctiger</i> (Thomson, 1896, <i>Habrocryptus</i>)</p><p style="margin-left: 40px;"><i>insulanus</i> (Krieger, 1897, <i>Habrocryptus</i>)</p><p style="margin-left: 40px;"><i>helveticator</i> Aubert, 1968</p>							England, Scotland
300766	Animalia		Arthropoda			Insecta			Hymenoptera			Ichneumonoidea	Ichneumonidae	CRYPTINAE	CRYPTINI		Listrognathus						Tschek, 1871	<p style="margin-left: 40px;"><i>MESOSTENIDEA</i> Viereck, 1914</p><p style="margin-left: 40px;"><i>MESOSTENUS</i> misident.</p>
300767	Animalia		Arthropoda			Insecta			Hymenoptera			Ichneumonoidea	Ichneumonidae	CRYPTINAE	CRYPTINI		Listrognathus		firmator				(Fabricius, 1798)	<p style="margin-left: 40px;"><i>Ichneumon firmator</i> Fabricius, 1798</p><p style="margin-left: 40px;"><i>ligator</i> (Gravenhorst, 1829, <i>Mesostenus</i>)</p><p style="margin-left: 40px;"><i>senilis</i> (Rudow, 1882, <i>Cryptus</i>)</p><p style="margin-left: 40px;"><i>aculeatus</i> (Rudow, 1883, <i>Cryptus</i>)</p>							England		The valid name according to Horstmann (2001b); listed as ligator by Schwarz &amp; Shaw (1998). Distribution data from Horstmann (1990a)
300768	Animalia		Arthropoda			Insecta			Hymenoptera			Ichneumonoidea	Ichneumonidae	CRYPTINAE	CRYPTINI		Listrognathus		mactator				(Thunberg, 1824)	<p style="margin-left: 40px;"><i>Ichneumon mactator</i> Thunberg, 1824</p><p style="margin-left: 40px;"><i>niveatus</i> (Gravenhorst, 1829, <i>Mesostenus</i>)</p><p style="margin-left: 40px;"><i>pygostolus</i> (Gravenhorst, 1829, <i>Mesostenus</i>)</p><p style="margin-left: 40px;"><i>tricolor</i> Tschek, 1872</p><p style="margin-left: 40px;"><i>intermedius</i> (Szépligeti, 1916, <i>Mesostenus</i>…
300769	Animalia		Arthropoda			Insecta			Hymenoptera			Ichneumonoidea	Ichneumonidae	CRYPTINAE	CRYPTINI		Listrognathus		mengersseni				Schmiedeknecht, 1905								England		added by Horstmann (1990a)
300770	Animalia		Arthropoda			Insecta			Hymenoptera			Ichneumonoidea	Ichneumonidae	CRYPTINAE	CRYPTINI		Listrognathus		obnoxius				(Gravenhorst, 1829)	<p style="margin-left: 40px;"><i>Mesostenus obnoxius</i> Gravenhorst, 1829</p><p style="margin-left: 40px;"><i>zygaenarum</i> (Ratzeburg, 1847, <i>Cryptus</i>)</p><p style="margin-left: 40px;"><i>subovalis</i> (Thomson, 1873, <i>Mesostenus</i>)</p><p style="margin-left: 40px;"><i>robustus</i> (Rudow, 1882, <i>Cryptus</i>)</p><p style="margin-left: 40px;"><i>subcircularis</i> (Thomson, 1896, <i>Me…							England, Wales
300771	Animalia		Arthropoda			Insecta			Hymenoptera			Ichneumonoidea	Ichneumonidae	CRYPTINAE	CRYPTINI		Meringopus						Förster, 1869	<p style="margin-left: 40px;"><i>GONIOCRYPTUS</i> Thomson, 1873</p>
300772	Animalia		Arthropoda			Insecta			Hymenoptera			Ichneumonoidea	Ichneumonidae	CRYPTINAE	CRYPTINI		Meringopus		attentorius				(Panzer, 1804)	<p style="margin-left: 40px;"><i>Ichneumon attentorius</i> Panzer, 1804</p><p style="margin-left: 40px;"><i>confiscator</i> (Fabricius, 1804, <i>Cryptus</i>)</p><p style="margin-left: 40px;"><i>alboannulatus</i> (Szépligeti, 1916, <i>Cryptus</i>)</p>
300773	Animalia		Arthropoda			Insecta			Hymenoptera			Ichneumonoidea	Ichneumonidae	CRYPTINAE	CRYPTINI		Meringopus		cyanator				(Gravenhorst, 1829)	<p style="margin-left: 40px;"><i>Cryptus cyanator</i> Gravenhorst, 1829</p><p style="margin-left: 40px;"><i>?fuscescens</i> (Gmelin, 1790, <i>Ichneumon</i>)</p><p style="margin-left: 40px;"><i>?roeselii</i> (Bechstein &amp; Scharfenberg, 1805, <i>Ichneumon</i>)</p>
300774	Animalia		Arthropoda			Insecta			Hymenoptera			Ichneumonoidea	Ichneumonidae	CRYPTINAE	CRYPTINI		Meringopus		titillator				(Linnaeus, 1758)	<p style="margin-left: 40px;"><i>Ichneumon titillator</i> Linnaeus, 1758</p><p style="margin-left: 40px;"><i>recreator</i> (Fabricius, 1804, <i>Cryptus</i>)</p><p style="margin-left: 40px;"><i>tornator</i> (Panzer, 1804, <i>Ichneumon</i>)</p><p style="margin-left: 40px;"><i>pupurator</i> (Thunberg, 1824, <i>Ichneumon</i>)</p><p style="margin-left: 40px;"><i>australis</i> (Tschek, 1871, <i>Cryptus…							England
300775	Animalia		Arthropoda			Insecta			Hymenoptera			Ichneumonoidea	Ichneumonidae	CRYPTINAE	CRYPTINI		Mesostenus						Gravenhorst, 1829	<p style="margin-left: 40px;"><i>STENARAEUS</i> Thomson, 1896</p>
300776	Animalia		Arthropoda			Insecta			Hymenoptera			Ichneumonoidea	Ichneumonidae	CRYPTINAE	CRYPTINI		Mesostenus		transfuga				Gravenhorst, 1829	<p style="margin-left: 40px;"><i>gallarum</i> (Rudow, 1881, <i>Hemiteles</i>)</p><p style="margin-left: 40px;"><i>gallarum</i> (Rudow, 1882, <i>Hemiteles</i>)</p><p style="margin-left: 40px;"><i>ingenuus</i> Tosquinet, 1896</p><p style="margin-left: 40px;"><i>niger</i> Kiss, 1929</p>							England
300777	Animalia		Arthropoda			Insecta			Hymenoptera			Ichneumonoidea	Ichneumonidae	CRYPTINAE	CRYPTINI		Nematopodius						Gravenhorst, 1829	<p style="margin-left: 40px;"><i>PSEUDOPIMPLA</i> Fahringer, 1935</p>
300778	Animalia		Arthropoda			Insecta			Hymenoptera			Ichneumonoidea	Ichneumonidae	CRYPTINAE	CRYPTINI		Nematopodius		debilis				(Ratzeburg, 1852)	<p style="margin-left: 40px;"><i>Mesostenus debilis</i> Ratzeburg, 1852</p><p style="margin-left: 40px;"><i>formosus</i> misident.</p><p style="margin-left: 40px;"><i>tricolor</i> (Haupt, 1954, <i>Mesostenus</i>)</p><p style="margin-left: 40px;"><i>homonymator</i> (Aubert, 1959, <i>Mesostenus</i>)</p>							England
300779	Animalia		Arthropoda			Insecta			Hymenoptera			Ichneumonoidea	Ichneumonidae	CRYPTINAE	CRYPTINI		Picardiella						Lichtenstein, 1920	<p style="margin-left: 40px;"><i>BORCIELLA</i> Constantineanu, 1929</p><p style="margin-left: 40px;"><i>NIPPORICNUS</i> Uchida, 1931</p><p style="margin-left: 40px;"><i>PARETHA</i> Seyrig, 1952</p>
300780	Animalia		Arthropoda			Insecta			Hymenoptera			Ichneumonoidea	Ichneumonidae	CRYPTINAE	CRYPTINI		Picardiella		melanoleuca				(Gravenhorst, 1829)	<p style="margin-left: 40px;"><i>Cryptus melanoleucus</i> Gravenhorst, 1829</p><p style="margin-left: 40px;"><i>argiola</i> (Rudow, 1882, <i>Mesostenus</i>)</p><p style="margin-left: 40px;"><i>peregrina</i> (Schmiedeknecht, 1905, <i>Mesostenus</i>)</p><p style="margin-left: 40px;"><i>crenulata</i> (Constantineanu, 1929, <i>Borciella</i>)</p><p style="margin-left: 40px;"><i>tarsoleuca</i> (Kiss, 1…							England		NHM, det. Broad, added here
300781	Animalia		Arthropoda			Insecta			Hymenoptera			Ichneumonoidea	Ichneumonidae	CRYPTINAE	CRYPTINI		Polytribax						Förster, 1869	<p style="margin-left: 40px;"><i>EPIPHOBUS</i> Förster, 1869</p><p style="margin-left: 40px;"><i>NELEOPHRON</i> Förster, 1869</p><p style="margin-left: 40px;"><i>PLESIGNATHUS</i> Förster, 1869</p>									Polytribax is transferred here from the Phygadeuontini, following the molecular phylogenetic results of Laurenne et al. (2006). Unlike hemigastrine genera (where known), Polytribax attack Lepidoptera pupae.
300782	Animalia		Arthropoda			Insecta			Hymenoptera			Ichneumonoidea	Ichneumonidae	CRYPTINAE	CRYPTINI		Polytribax		arrogans				(Gravenhorst, 1829)	<p style="margin-left: 40px;"><i>Cryptus arrogans</i> Gravenhorst, 1829</p><p style="margin-left: 40px;"><i>sectator</i> (Gravenhorst, 1829, <i>Phygadeuon</i>)</p><p style="margin-left: 40px;"><i>longipes</i> (Hartig, 1838, <i>Cryptus</i>)</p><p style="margin-left: 40px;"><i>halensis</i> (Taschenberg, 1865, <i>Phygadeuon</i>)</p><p style="margin-left: 40px;"><i>nigriventris</i> (Habermehl, 1917, …							England, Scotland, Wales, Ireland, Isle of Man
300783	Animalia		Arthropoda			Insecta			Hymenoptera			Ichneumonoidea	Ichneumonidae	CRYPTINAE	CRYPTINI		Polytribax		perspicillator				(Gravenhorst, 1807)	<p style="margin-left: 40px;"><i>Ichneumon perspicillator</i> Gravenhorst, 1807</p><p style="margin-left: 40px;"><i>desertor</i> (Gravenhorst, 1829, <i>Phygadeuon</i>)</p><p style="margin-left: 40px;"><i>obscuripes</i> (Taschenberg, 1865, <i>Phygadeuon</i>)</p><p style="margin-left: 40px;"><i>errator</i> (Marshall, 1868, <i>Phygadeuon</i>)</p><p style="margin-left: 40px;"><i>rufofemoratus</i> (St…							England, Scotland, Ireland
300784	Animalia		Arthropoda			Insecta			Hymenoptera			Ichneumonoidea	Ichneumonidae	CRYPTINAE	CRYPTINI		Polytribax		picticornis				(Ruthe, 1859)	<p style="margin-left: 40px;"><i>Cryptus picticornis</i> Ruthe, 1859</p><p style="margin-left: 40px;"><i>gravenhorstii</i> (Thomson, 1883, <i>Microcryptus</i>)</p>							England, Scotland, Wales		NMS, NHM, added here
300785	Animalia		Arthropoda			Insecta			Hymenoptera			Ichneumonoidea	Ichneumonidae	CRYPTINAE	CRYPTINI		Polytribax		rufipes				(Gravenhorst, 1829)	<p style="margin-left: 40px;"><i>Cryptus rufipes</i> Gravenhorst, 1829</p><p style="margin-left: 40px;"><i>curvus</i> (Schrank, 1802, <i>Ichneumon</i>)</p><p style="margin-left: 40px;"><i>rufipes</i> (Schrank, 1835, <i>Ichneumon</i>)</p><p style="margin-left: 40px;"><i>vexator</i> (Pfankuch, 1921, <i>Microcryptus</i>)</p>							England, Ireland
300786	Animalia		Arthropoda			Insecta			Hymenoptera			Ichneumonoidea	Ichneumonidae	CRYPTINAE	CRYPTINI		Sphecophaga						Westwood, 1840	<p style="margin-left: 40px;"><i>CHRYONOMON</i> Desvignes, 1856</p><p style="margin-left: 40px;"><i>CACOTROPA</i> Förster, 1869</p>
300787	Animalia		Arthropoda			Insecta			Hymenoptera			Ichneumonoidea	Ichneumonidae	CRYPTINAE	CRYPTINI		Sphecophaga		vesparum				(Curtis, 1828)	<p style="margin-left: 40px;"><i>Anomalon vesparum</i> Curtis, 1828</p><p style="margin-left: 40px;"><i>striata</i> (Zetterstedt, 1838, <i>Bassus</i>)</p><p style="margin-left: 40px;"><i>vesparum</i> (Ratzeburg, 1852, <i>Tryphon</i>)</p><p style="margin-left: 40px;"><i>sericea</i> (Thomson, 1888, <i>Cacotropa</i>)</p><p style="margin-left: 40px;"><i>thuringiaca</i> Schmiedeknecht, 1914</p>							England, Scotland, Ireland
300788	Animalia		Arthropoda			Insecta			Hymenoptera			Ichneumonoidea	Ichneumonidae	CRYPTINAE	CRYPTINI		Thrybius						Townes, 1965
300789	Animalia		Arthropoda			Insecta			Hymenoptera			Ichneumonoidea	Ichneumonidae	CRYPTINAE	CRYPTINI		Thrybius		brevispina				(Thomson, 1896)	<p style="margin-left: 40px;"><i>Hygrocryptus brevispina</i> Thomson, 1896</p><p style="margin-left: 40px;"><i>puhlmanni</i> (Ulbricht, 1909, <i>Hygrocryptus</i>)</p>							England		Incorrectly listed as a synonym of praedator in Yu &amp; Horstmann (1997).
300790	Animalia		Arthropoda			Insecta			Hymenoptera			Ichneumonoidea	Ichneumonidae	CRYPTINAE	CRYPTINI		Thrybius		praedator				(Rossi, 1792)	<p style="margin-left: 40px;"><i>Ichneumon praedator</i> Rossi, 1792</p><p style="margin-left: 40px;"><i>leucopygus</i> (Gravenhorst, 1829, <i>Hoplismenus</i>)</p><p style="margin-left: 40px;"><i>praedator</i> (Gravenhorst, 1829, <i>Cryptus</i>)</p><p style="margin-left: 40px;"><i>sanguinolentus</i> (Gravenhorst, 1829, <i>Cryptus</i>)</p><p style="margin-left: 40px;"><i>elegans</i> (Desvignes, 18…							England, Wales
300791	Animalia		Arthropoda			Insecta			Hymenoptera			Ichneumonoidea	Ichneumonidae	CRYPTINAE	CRYPTINI		Trychosis						Förster, 1869
300792	Animalia		Arthropoda			Insecta			Hymenoptera			Ichneumonoidea	Ichneumonidae	CRYPTINAE	CRYPTINI		Trychosis		ambigua				(Tschek, 1871)	<p style="margin-left: 40px;"><i>Cryptus ambiguus</i> Tschek, 1871</p><p style="margin-left: 40px;"><i>mesocastana</i> (Tschek, 1871, <i>Cryptus</i>)</p><p style="margin-left: 40px;"><i>molesta</i> (Tschek, 1871, <i>Cryptus</i>)</p><p style="margin-left: 40px;"><i>annulicornis</i> (Thomson, 1896, <i>Goniocryptus</i>)</p><p style="margin-left: 40px;"><i>trisculpta</i> (Habermehl, 1929, <i>Goniocry…							England		NHM, det. Schwarz, added here
300793	Animalia		Arthropoda			Insecta			Hymenoptera			Ichneumonoidea	Ichneumonidae	CRYPTINAE	CRYPTINI		Trychosis		atripes				(Gravenhorst, 1829)	<p style="margin-left: 40px;"><i>Cryptus atripes</i> Gravenhorst, 1829</p><p style="margin-left: 40px;"><i>castaniventris</i> (Tschek, 1871, <i>Cryptus</i>)</p><p style="margin-left: 40px;"><i>curvipes</i> (Tschek, 1871, <i>Cryptus</i>)</p><p style="margin-left: 40px;"><i>jugorum</i> (Strobl, 1901, <i>Idiolispa</i>)</p>							England		NHM, det. Schwarz, added here
300794	Animalia		Arthropoda			Insecta			Hymenoptera			Ichneumonoidea	Ichneumonidae	CRYPTINAE	CRYPTINI		Trychosis		?ingrata				(Tschek, 1871)	<p style="margin-left: 40px;"><i>Cryptus ingratus</i> Tschek, 1871</p><p style="margin-left: 40px;"><i>macroura</i> (Thomson, 1873, <i>Goniocryptus</i>)</p>									added by Schwarz &amp; Shaw (1998); tentative identification by Schwarz &amp; Shaw (1998).
300795	Animalia		Arthropoda			Insecta			Hymenoptera			Ichneumonoidea	Ichneumonidae	CRYPTINAE	CRYPTINI		Trychosis		insularis				Rossem, 1990								England		added by Schwarz &amp; Shaw (1998)
300796	Animalia		Arthropoda			Insecta			Hymenoptera			Ichneumonoidea	Ichneumonidae	CRYPTINAE	CRYPTINI		Trychosis		legator				(Thunberg, 1824)	<p style="margin-left: 40px;"><i>Ichneumon legator</i> Thunberg, 1824</p><p style="margin-left: 40px;"><i>mesocastana</i> misident.</p><p style="margin-left: 40px;"><i>titillator</i> misident.</p><p style="margin-left: 40px;"><i>bicolor</i> (Lucas, 1849, <i>Cryptus</i>)</p><p style="margin-left: 40px;"><i>abnormis</i> (Tschek, 1871, <i>Cryptus</i>)</p><p style="margin-left: 40px;"><i>inimica</i> …							England, Scotland, Wales, Ireland, Isle of Man
300797	Animalia		Arthropoda			Insecta			Hymenoptera			Ichneumonoidea	Ichneumonidae	CRYPTINAE	CRYPTINI		Trychosis		neglecta				(Tschek, 1871)	<p style="margin-left: 40px;"><i>Cryptus neglectus</i> Tschek, 1871</p>							England		NHM, det. Schwarz, added here
300798	Animalia		Arthropoda			Insecta			Hymenoptera			Ichneumonoidea	Ichneumonidae	CRYPTINAE	CRYPTINI		Trychosis		picta				(Thomson, 1873)	<p style="margin-left: 40px;"><i>Goniocryptus pictus</i> Thomson, 1873</p>							England, Scotland		added by Schwarz &amp; Shaw (1998)
300799	Animalia		Arthropoda			Insecta			Hymenoptera			Ichneumonoidea	Ichneumonidae	CRYPTINAE	CRYPTINI		Trychosis		tristator				(Tschek, 1871)	<p style="margin-left: 40px;"><i>Cryptus tristator</i> Tschek, 1871</p><p style="margin-left: 40px;"><i>glabricula</i> (Thomson, 1873, <i>Goniocryptus</i>)</p><p style="margin-left: 40px;"><i>pleuralis</i> (Thomson, 1896, <i>Goniocryptus</i>)</p><p style="margin-left: 40px;"><i>tristatrix</i> Schulz, 1906</p>							England		added by Schwarz &amp; Shaw (1998); UM
300800	Animalia		Arthropoda			Insecta			Hymenoptera			Ichneumonoidea	Ichneumonidae	CRYPTINAE	CRYPTINI		Xylophrurus						Förster, 1869	<p style="margin-left: 40px;"><i>NYXEOPHILUS</i> Förster, 1869</p><p style="margin-left: 40px;"><i>MACROCRYPTUS</i> Thomson, 1873</p><p style="margin-left: 40px;"><i>NYXEOPHILUS</i> Thomson, 1885</p>
300801	Animalia		Arthropoda			Insecta			Hymenoptera			Ichneumonoidea	Ichneumonidae	CRYPTINAE	CRYPTINI		Xylophrurus		lancifer				(Gravenhorst, 1829)	<p style="margin-left: 40px;"><i>Echthrus lancifer</i> Gravenhorst, 1829</p><p style="margin-left: 40px;"><i>dispar</i> (Thunberg, 1824, <i>Ichneumon</i>)</p><p style="margin-left: 40px;"><i>?nubeculatus</i> (Gravenhorst, 1829, <i>Echthrus</i>)</p><p style="margin-left: 40px;"><i>?dentifer</i> (Thomson, 1896, <i>Caenocryptus</i>)</p><p style="margin-left: 40px;"><i>?castaniventris</i> (Habermehl,…							England, Scotland		added by Schwarz &amp; Shaw (1998)
300802	Animalia		Arthropoda			Insecta			Hymenoptera			Ichneumonoidea	Ichneumonidae	CRYPTINAE	CRYPTINI		Xylophrurus		tumidus				(Desvignes, 1856)	<p style="margin-left: 40px;"><i>Cryptus tumidus</i> Desvignes, 1856</p><p style="margin-left: 40px;"><i>longiseta</i> (Rudow, 1882, <i>Cryptus</i>)</p>							England		Separated from lancifer by Schwarz &amp; Shaw (1998).
300803	Animalia		Arthropoda			Insecta			Hymenoptera			Ichneumonoidea	Ichneumonidae	CRYPTINAE	CRYPTINI		Stenarella						Szépligeti, 1916										Species of Stenarella excluded from the British ad Irish list by Schwarz &amp; Shaw (1998): [domator (Poda, 1761, Ichneumon) gladiator (Scopoli, 1763, Ichneumon)]
300804	Animalia		Arthropoda			Insecta			Hymenoptera			Ichneumonoidea	Ichneumonidae	CRYPTINAE	HEMIGASTRINI								Ashmead, 1900	<p style="margin-left: 40px;"><i>APTESINI</i> Smith &amp; Shenefelt, 1955</p><p style="margin-left: 40px;"><i>ECHTHRINI</i> Narayanan &amp; Kundanlal, 1958</p>									Following the molecular phylogenetic results of Laurenne et al. (2006), the genera Echthrus and Polytribax have been transferred to the Cryptini, together with Helcostizus from Phygadeuontini. ‘Hemigastrini’ is to be preferred over ‘Hemigasterini’ (Burks, 2012). Distribution data from NHM, NMS (mostly det. M. Schwarz and J. Sawoniewicz in the latter) and UM; Fitton (1976) also supplies some data …
300805	Animalia		Arthropoda			Insecta			Hymenoptera			Ichneumonoidea	Ichneumonidae	CRYPTINAE	HEMIGASTRINI		Aconias						Cameron, 1904
300806	Animalia		Arthropoda			Insecta			Hymenoptera			Ichneumonoidea	Ichneumonidae	CRYPTINAE	HEMIGASTRINI		Aconias		tarsatus				(Bridgman, 1881)	<p style="margin-left: 40px;"><i>Phygadeuon tarsatus</i> Bridgman, 1881</p><p style="margin-left: 40px;"><i>pectoralis</i> (Thomson, 1896, <i>Plectocryptus</i>)</p><p style="margin-left: 40px;"><i>lateannulatus</i> (Strobl, 1901, <i>Chaeretymma</i>)</p><p style="margin-left: 40px;"><i>nigrofemoratus</i> (Strobl, 1901, <i>Plectocryptus</i>)</p>							England, Scotland, Ireland
300807	Animalia		Arthropoda			Insecta			Hymenoptera			Ichneumonoidea	Ichneumonidae	CRYPTINAE	HEMIGASTRINI		Aptesis						Förster, 1850	<p style="margin-left: 40px;"><i>PEZOPORUS</i> Förster, 1869</p><p style="margin-left: 40px;"><i>CLYPEODIODON</i> Aubert, 1968</p>									doubtfully placed species of Aptesis: [leucosticta (Gravenhorst, 1829, Cryptus) nom. dub.]
300808	Animalia		Arthropoda			Insecta			Hymenoptera			Ichneumonoidea	Ichneumonidae	CRYPTINAE	HEMIGASTRINI		Aptesis		assimilis				(Gravenhorst, 1829)	<p style="margin-left: 40px;"><i>Phygadeuon assimilis</i> Gravenhorst, 1829</p><p style="margin-left: 40px;"><i>distans</i> (Thomson, 1883, <i>Microcryptus</i>)</p>							Ireland, Isle of Man
300809	Animalia		Arthropoda			Insecta			Hymenoptera			Ichneumonoidea	Ichneumonidae	CRYPTINAE	HEMIGASTRINI		Aptesis		cretata				(Gravenhorst, 1829)	<p style="margin-left: 40px;"><i>Phygadeuon cretatus</i> Gravenhorst, 1829</p>							England
300810	Animalia		Arthropoda			Insecta			Hymenoptera			Ichneumonoidea	Ichneumonidae	CRYPTINAE	HEMIGASTRINI		Aptesis		femoralis				(Thomson, 1883)	<p style="margin-left: 40px;"><i>Microcryptus femoralis</i> Thomson, 1883</p><p style="margin-left: 40px;"><i>zonata</i> (Kriechbaumer, 1893, <i>Microcryptus</i>)</p><p style="margin-left: 40px;"><i>alpina</i> (Strobl, 1901, <i>Microcryptus</i>)</p>							England, Ireland
300811	Animalia		Arthropoda			Insecta			Hymenoptera			Ichneumonoidea	Ichneumonidae	CRYPTINAE	HEMIGASTRINI		Aptesis		flagitator				(Rossius, 1794)	<p style="margin-left: 40px;"><i>Icheumon flagitator</i> Rossius, 1794</p><p style="margin-left: 40px;"><i>pumilio</i> (Gravenhorst, 1829, <i>Phygadeuon</i>)</p><p style="margin-left: 40px;"><i>tyranna</i> (Gravenhorst, 1829, <i>Phygadeuon</i>)</p><p style="margin-left: 40px;"><i>hopei</i> (Desvignes, 1856, <i>Cryptus</i>)</p><p style="margin-left: 40px;"><i>proximator</i> (Costa, 1886, <i>Phygad…							England, Ireland
300812	Animalia		Arthropoda			Insecta			Hymenoptera			Ichneumonoidea	Ichneumonidae	CRYPTINAE	HEMIGASTRINI		Aptesis		improba				(Gravenhorst, 1829)	<p style="margin-left: 40px;"><i>Phygadeuon improbus</i> Gravenhorst, 1829</p><p style="margin-left: 40px;"><i>exigua</i> (Habermehl, 1909, <i>Microcryptus</i>)</p><p style="margin-left: 40px;"><i>bisignata</i> (Habermehl, 1919, <i>Microcryptus</i>)</p>							Ireland
300813	Animalia		Arthropoda			Insecta			Hymenoptera			Ichneumonoidea	Ichneumonidae	CRYPTINAE	HEMIGASTRINI		Aptesis		jejunator				(Gravenhorst, 1807)	<p style="margin-left: 40px;"><i>Ichneumon jejunator</i> Gravenhorst, 1807</p><p style="margin-left: 40px;"><i>abdominator</i> (Gravenhorst, 1829, <i>Phygadeuon</i>)</p><p style="margin-left: 40px;"><i>nematorum</i> (Rudow, 1886, <i>Phygadeuon</i>)</p><p style="margin-left: 40px;"><i>genalis</i> (Kriechbaumer, 1895, <i>Microcryptus</i>)</p><p style="margin-left: 40px;"><i>albilarva</i> (Speiser, …							England, Ireland
300814	Animalia		Arthropoda			Insecta			Hymenoptera			Ichneumonoidea	Ichneumonidae	CRYPTINAE	HEMIGASTRINI		Aptesis		nigricollis				(Thomson, 1883)	<p style="margin-left: 40px;"><i>Acanthocryptus nigricollis</i> Thomson, 1883</p>							England, Ireland		Listed as a species of Rhembobius by Fitton (1978).
300815	Animalia		Arthropoda			Insecta			Hymenoptera			Ichneumonoidea	Ichneumonidae	CRYPTINAE	HEMIGASTRINI		Aptesis		nigritula				(Thomson, 1885)	<p style="margin-left: 40px;"><i>Microcryptus nigritulus</i> Thomson, 1885</p><p style="margin-left: 40px;"><i>nigripes</i> (Strobl, 1901, <i>Stenocryptus</i>)</p>							England, Ireland
300816	Animalia		Arthropoda			Insecta			Hymenoptera			Ichneumonoidea	Ichneumonidae	CRYPTINAE	HEMIGASTRINI		Aptesis		nigrocincta				(Gravenhorst, 1815)	<p style="margin-left: 40px;"><i>Ichneumon nigrocinctus</i> Gravenhorst, 1815</p><p style="margin-left: 40px;"><i>?bimaculata</i> (Christ, 1791, <i>Ichneumon</i>)</p><p style="margin-left: 40px;"><i>sudetica</i> (Gravenhorst, 1815, <i>Ichneumon</i>)</p><p style="margin-left: 40px;"><i>duplicatoria</i> (Thunberg, 1824, <i>Ichneumon, Ichneumon</i>)</p><p style="margin-left: 40px;"><i>flaveolata</i>…							England, Scotland, Wales, Ireland
300817	Animalia		Arthropoda			Insecta			Hymenoptera			Ichneumonoidea	Ichneumonidae	CRYPTINAE	HEMIGASTRINI		Aptesis		orbitalis				(Thomson, 1883)	<p style="margin-left: 40px;"><i>Microcryptus orbitalis</i> Thomson, 1883</p>									NHM, added here; specimen labelled as from British Isles, Billups coll.
300818	Animalia		Arthropoda			Insecta			Hymenoptera			Ichneumonoidea	Ichneumonidae	CRYPTINAE	HEMIGASTRINI		Aptesis		scotica				(Marshall, 1868)	<p style="margin-left: 40px;"><i>Phygadeuon scoticus</i> Marshall, 1868</p>							Scotland
300819	Animalia		Arthropoda			Insecta			Hymenoptera			Ichneumonoidea	Ichneumonidae	CRYPTINAE	HEMIGASTRINI		Aptesis		terminata				(Gravenhorst, 1829)	<p style="margin-left: 40px;"><i>Phygadeuon terminatus</i> Gravenhorst, 1829</p><p style="margin-left: 40px;"><i>gilvipes</i> (Gravenhorst, 1829, <i>Phygadeuon</i>)</p><p style="margin-left: 40px;"><i>ceilonota</i> (Taschenberg, 1865, <i>Phygadeuon</i>)</p>							England
300820	Animalia		Arthropoda			Insecta			Hymenoptera			Ichneumonoidea	Ichneumonidae	CRYPTINAE	HEMIGASTRINI		Colocnema						Förster, 1869	<p style="margin-left: 40px;"><i>COELOCRYPTUS</i> Thomson, 1873</p>
300821	Animalia		Arthropoda			Insecta			Hymenoptera			Ichneumonoidea	Ichneumonidae	CRYPTINAE	HEMIGASTRINI		Colocnema		rufina				(Gravenhorst, 1829)	<p style="margin-left: 40px;"><i>Phygadeuon rufinus</i> Gravenhorst, 1829</p><p style="margin-left: 40px;"><i>romani</i> (Pfankuch, 1914, <i>Plectocryptus</i>)</p>							England
300822	Animalia		Arthropoda			Insecta			Hymenoptera			Ichneumonoidea	Ichneumonidae	CRYPTINAE	HEMIGASTRINI		Cratocryptus						Thomson, 1873
300823	Animalia		Arthropoda			Insecta			Hymenoptera			Ichneumonoidea	Ichneumonidae	CRYPTINAE	HEMIGASTRINI		Cratocryptus		?furcator				(Gravenhorst, 1829)	<p style="margin-left: 40px;"><i>Cryptus ?furcator</i> Gravenhorst, 1829</p>							Scotland		Material in UM, det. J.P. Brock, but see note under subpetiolatus.
300824	Animalia		Arthropoda			Insecta			Hymenoptera			Ichneumonoidea	Ichneumonidae	CRYPTINAE	HEMIGASTRINI		Cratocryptus		subpetiolatus				(Gravenhorst, 1829)	<p style="margin-left: 40px;"><i>Cryptus subpetiolatus</i> Gravenhorst, 1829</p>							England		Transferred from Cubocephalus by Sawoniewicz &amp; Wanat (2003). This species seems to have been confused with furcator and it is not clear if furcator occurs in Britain or Ireland.
300825	Animalia		Arthropoda			Insecta			Hymenoptera			Ichneumonoidea	Ichneumonidae	CRYPTINAE	HEMIGASTRINI		Cubocephalus						Ratzeburg, 1848	<p style="margin-left: 40px;"><i>CHAERETYMMA</i> Förster, 1869</p><p style="margin-left: 40px;"><i>ECPORTHETOR</i> Förster, 1869</p><p style="margin-left: 40px;"><i>PAMMACHUS</i> Förster, 1869</p><p style="margin-left: 40px;"><i>MICROCRYPTUS</i> Thomson, 1873</p><p style="margin-left: 40px;"><i>STENOCRYPTUS</i> Thomson, 1873</p><p style="margin-left: 40px;"><i>PLANOCRYPTUS</i> Heinrich, 1949</p>
300826	Animalia		Arthropoda			Insecta			Hymenoptera			Ichneumonoidea	Ichneumonidae	CRYPTINAE	HEMIGASTRINI		Cubocephalus		anatorius				(Gravenhorst, 1829)	<p style="margin-left: 40px;"><i>Cryptus anatorius</i> Gravenhorst, 1829</p><p style="margin-left: 40px;"><i>?dumetorum</i> (Geoffroy, 1785, <i>Ichneumon</i>)</p><p style="margin-left: 40px;"><i>stomaticus</i> (Gravenhorst, 1829, <i>Cryptus</i>)</p><p style="margin-left: 40px;"><i>exareolatus</i> (Habermehl, 1917, <i>Cratocryptus</i>)</p><p style="margin-left: 40px;"><i>albopictus</i> (Kiss, 1924…							England, Wales, Ireland
300827	Animalia		Arthropoda			Insecta			Hymenoptera			Ichneumonoidea	Ichneumonidae	CRYPTINAE	HEMIGASTRINI		Cubocephalus		associator				(Thunberg, 1824)	<p style="margin-left: 40px;"><i>Ichneumon associator</i> Thunberg, 1824</p><p style="margin-left: 40px;"><i>ruficoxis</i> (Thomson, 1873, <i>Cratocryptus</i>)</p>							England
300828	Animalia		Arthropoda			Insecta			Hymenoptera			Ichneumonoidea	Ichneumonidae	CRYPTINAE	HEMIGASTRINI		Cubocephalus		brevicornis				(Taschenberg, 1865)	<p style="margin-left: 40px;"><i>Phygadeuon brevicornis</i> Taschenberg, 1865</p><p style="margin-left: 40px;"><i>oviventris</i> misident.</p>							England, Ireland
300829	Animalia		Arthropoda			Insecta			Hymenoptera			Ichneumonoidea	Ichneumonidae	CRYPTINAE	HEMIGASTRINI		Cubocephalus		distinctor				(Thunberg, 1824)	<p style="margin-left: 40px;"><i>Ichneumon distinctor</i> Thunberg, 1824</p><p style="margin-left: 40px;"><i>fortipes</i> misident.</p>							England, Scotland, Wales, Ireland		Sawoniewicz (2003) treats fortipes (Gravenhorst, 1829, Cryptus), with canaliculatus (Gravenhorst, 1829, Ichneumon) as a synonym, as distinct from distinctor. Despite Sawoniewicz’s quote of Morley (1907) for the concept of fortipes, all the British material in NHM is referrable to distinctor, based on Sawoniewicz’s (2003) characters for separation of the species. NMS material has been identified b…
300830	Animalia		Arthropoda			Insecta			Hymenoptera			Ichneumonoidea	Ichneumonidae	CRYPTINAE	HEMIGASTRINI		Cubocephalus		femoralis				(Thomson, 1873)	<p style="margin-left: 40px;"><i>Cratocryptus femoralis</i> Thomson, 1873</p><p style="margin-left: 40px;"><i>kriegeri</i> (Habermehl, 1911, <i>Cratocryptus</i>)</p>
300831	Animalia		Arthropoda			Insecta			Hymenoptera			Ichneumonoidea	Ichneumonidae	CRYPTINAE	HEMIGASTRINI		Cubocephalus		nigriventris				(Thomson, 1874)	<p style="margin-left: 40px;"><i>Stenocryptus nigriventris</i> Thomson, 1874</p>							England, Scotland, Wales, Ireland
300832	Animalia		Arthropoda			Insecta			Hymenoptera			Ichneumonoidea	Ichneumonidae	CRYPTINAE	HEMIGASTRINI		Cubocephalus		sperator				(Müller, 1776)	<p style="margin-left: 40px;"><i>Ichneumon sperator</i> Müller, 1776</p><p style="margin-left: 40px;"><i>bilineatus</i> (Gravenhorst, 1829, <i>Cryptus</i>)</p><p style="margin-left: 40px;"><i>erythrinus</i> (Gravenhorst, 1829, <i>Cryptus</i>)</p><p style="margin-left: 40px;"><i>lacteator</i> (Gravenhorst, 1829, <i>Cryptus</i>)</p><p style="margin-left: 40px;"><i>semiorbitalis</i> (Gravenhorst, 18…							England, Scotland, Ireland		Listed as a species of Pleolophus in Yu &amp; Horstmann (1997) but included in Cubocephalus by Sawoniewicz (2003).
300833	Animalia		Arthropoda			Insecta			Hymenoptera			Ichneumonoidea	Ichneumonidae	CRYPTINAE	HEMIGASTRINI		Demopheles						Förster, 1869
300834	Animalia		Arthropoda			Insecta			Hymenoptera			Ichneumonoidea	Ichneumonidae	CRYPTINAE	HEMIGASTRINI		Demopheles		corruptor				(Taschenberg, 1865)	<p style="margin-left: 40px;"><i>Phygadeuon corruptor</i> Taschenberg, 1865</p>							England, Scotland, Ireland		Phygadeuon caliginosus Grav. is listed as a synonym of D. corruptor by Fitton (1978) but is now treated as a synonym of Phygadeuon ovatus Grav.
300835	Animalia		Arthropoda			Insecta			Hymenoptera			Ichneumonoidea	Ichneumonidae	CRYPTINAE	HEMIGASTRINI		Giraudia						Förster, 1869	<p style="margin-left: 40px;"><i>CALOCRYPTUS</i> Thomson, 1873</p><p style="margin-left: 40px;"><i>PSEUDOCRYPTUS</i> Kriechbaumer, 1893</p>
300836	Animalia		Arthropoda			Insecta			Hymenoptera			Ichneumonoidea	Ichneumonidae	CRYPTINAE	HEMIGASTRINI		Giraudia		grisescens				(Gravenhorst, 1829)	<p style="margin-left: 40px;"><i>Cryptus grisescens</i> Gravenhorst, 1829</p><p style="margin-left: 40px;"><i>scansor</i> (Thomson, 1890, <i>Plectocryptus</i>)</p><p style="margin-left: 40px;"><i>nigritarsis</i> (Ulbricht, 1910, <i>Plectocryptus</i>)</p>							Ireland
300837	Animalia		Arthropoda			Insecta			Hymenoptera			Ichneumonoidea	Ichneumonidae	CRYPTINAE	HEMIGASTRINI		Giraudia		gyratoria				(Thunberg, 1824)	<p style="margin-left: 40px;"><i>Ichneumon gyratorius</i> Thunberg, 1824</p><p style="margin-left: 40px;"><i>congruens</i> (Gravenhorst, 1829, <i>Cryptus</i>)</p><p style="margin-left: 40px;"><i>dimimilis</i> (Kiss, 1924, <i>Megaplectes</i>)</p>
300838	Animalia		Arthropoda			Insecta			Hymenoptera			Ichneumonoidea	Ichneumonidae	CRYPTINAE	HEMIGASTRINI		Javra						Cameron, 1903	<p style="margin-left: 40px;"><i>MONOCRYPTUS</i> Hellén, 1957</p>
300839	Animalia		Arthropoda			Insecta			Hymenoptera			Ichneumonoidea	Ichneumonidae	CRYPTINAE	HEMIGASTRINI		Javra		anomala				(Morley, 1908)	<p style="margin-left: 40px;"><i>Diadegma anomala</i> Morley, 1908</p><p style="margin-left: 40px;"><i>hedwigi</i> (Habermehl, 1929, <i>Microcryptus</i>)</p>							England, Scotland, Wales
300840	Animalia		Arthropoda			Insecta			Hymenoptera			Ichneumonoidea	Ichneumonidae	CRYPTINAE	HEMIGASTRINI		Javra		opaca				(Thomson, 1873)	<p style="margin-left: 40px;"><i>Cratocryptus opacus</i> Thomson, 1873</p><p style="margin-left: 40px;"><i>gracilicornis</i> (Kriechbaumer, 1891, <i>Microcryptus</i>)</p><p style="margin-left: 40px;"><i>jenneri</i> (Heinrich, 1949, <i>Microcryptus</i>)</p>							Scotland
300841	Animalia		Arthropoda			Insecta			Hymenoptera			Ichneumonoidea	Ichneumonidae	CRYPTINAE	HEMIGASTRINI		Javra		tricincta				(Gravenhorst, 1829)	<p style="margin-left: 40px;"><i>Cryptus tricinctus</i> Gravenhorst, 1829</p><p style="margin-left: 40px;"><i>areolaris</i> (Thomson, 1883, <i>Microcryptus</i>)</p><p style="margin-left: 40px;"><i>prominens</i> (Schmiedeknecht, 1931, <i>Microcryptus</i>)</p>							England, Wales
300842	Animalia		Arthropoda			Insecta			Hymenoptera			Ichneumonoidea	Ichneumonidae	CRYPTINAE	HEMIGASTRINI		Listrocryptus						Brauns, 1905
300843	Animalia		Arthropoda			Insecta			Hymenoptera			Ichneumonoidea	Ichneumonidae	CRYPTINAE	HEMIGASTRINI		Listrocryptus		spatulatus				Brauns, 1905								England		NMS (det. Schwarz), NHM, added here
300844	Animalia		Arthropoda			Insecta			Hymenoptera			Ichneumonoidea	Ichneumonidae	CRYPTINAE	HEMIGASTRINI		Megaplectes						Förster, 1869	<p style="margin-left: 40px;"><i>IOCRYPTUS</i> Thomson, 1873</p><p style="margin-left: 40px;"><i>MEGALOPLECTES</i> Schulz, 1906</p>
300845	Animalia		Arthropoda			Insecta			Hymenoptera			Ichneumonoidea	Ichneumonidae	CRYPTINAE	HEMIGASTRINI		Megaplectes		monticola				(Gravenhorst, 1829)	<p style="margin-left: 40px;"><i>Ichneumon monticola</i> Gravenhorst, 1829</p><p style="margin-left: 40px;"><i>regius</i> (Taschenberg, 1865, <i>Phygadeuon</i>)</p><p style="margin-left: 40px;"><i>andrei</i> (Berthoumieu, 1897, <i>Eurylabus</i>)</p><p style="margin-left: 40px;"><i>lucens</i> Torka, 1935</p>
300846	Animalia		Arthropoda			Insecta			Hymenoptera			Ichneumonoidea	Ichneumonidae	CRYPTINAE	HEMIGASTRINI		Oresbius						Marshall, 1867	<p style="margin-left: 40px;"><i>OPIDNUS</i> Förster, 1869</p>
300847	Animalia		Arthropoda			Insecta			Hymenoptera			Ichneumonoidea	Ichneumonidae	CRYPTINAE	HEMIGASTRINI		Oresbius		arridens				(Gravenhorst, 1829)	<p style="margin-left: 40px;"><i>Phygadeuon arridens</i> Gravenhorst, 1829</p><p style="margin-left: 40px;"><i>niveatus</i> (Desvignes, 1856, <i>Ichneumon</i>)</p><p style="margin-left: 40px;"><i>rhombifer</i> (Kriechbaumer, 1893, <i>Microcryptus</i>)</p>							England, Ireland
300848	Animalia		Arthropoda			Insecta			Hymenoptera			Ichneumonoidea	Ichneumonidae	CRYPTINAE	HEMIGASTRINI		Oresbius		castaneus				Marshall, 1867	<p style="margin-left: 40px;"><i>terrestris</i> (Roman, 1909, <i>Microcryptus</i>)</p>							Scotland
300849	Animalia		Arthropoda			Insecta			Hymenoptera			Ichneumonoidea	Ichneumonidae	CRYPTINAE	HEMIGASTRINI		Oresbius		funereus				(Schmiedeknecht, 1905)	<p style="margin-left: 40px;"><i>Microcryptus funereus</i> Schmiedeknecht, 1905</p>
300850	Animalia		Arthropoda			Insecta			Hymenoptera			Ichneumonoidea	Ichneumonidae	CRYPTINAE	HEMIGASTRINI		Oresbius		galactinus				(Gravenhorst, 1829)	<p style="margin-left: 40px;"><i>Phygadeuon galactinus</i> Gravenhorst, 1829</p><p style="margin-left: 40px;"><i>fulgens</i> (Taschenberg, 1865, <i>Phygadeuon</i>)</p><p style="margin-left: 40px;"><i>nigricans</i> (Pfankuch, 1923, <i>Microcryptus</i>)</p>							Ireland
300851	Animalia		Arthropoda			Insecta			Hymenoptera			Ichneumonoidea	Ichneumonidae	CRYPTINAE	HEMIGASTRINI		Oresbius		leucopsis				(Gravenhorst, 1829)	<p style="margin-left: 40px;"><i>Cryptus leucopsis</i> Gravenhorst, 1829</p><p style="margin-left: 40px;"><i>nycthemerus</i> (Gravenhorst, 1829, <i>Phygadeuon</i>)</p><p style="margin-left: 40px;"><i>brumatae</i> (Rudow, 1886, <i>Phygadeuon</i>)</p><p style="margin-left: 40px;"><i>nigriventris</i> (Thomson, 1896, <i>Mesocryptus</i>)</p><p style="margin-left: 40px;"><i>victorovi</i> Jonaitis, 1981…							England, Ireland
300852	Animalia		Arthropoda			Insecta			Hymenoptera			Ichneumonoidea	Ichneumonidae	CRYPTINAE	HEMIGASTRINI		Oresbius		nivalis				(Zetterstedt, 1838)	<p style="margin-left: 40px;"><i>Cryptus nivalis</i> Zetterstedt, 1838</p><p style="margin-left: 40px;"><i>opacus</i> (Taschenberg, 1865, <i>Cryptus</i>)</p><p style="margin-left: 40px;"><i>borealis</i> (Thomson, 1883, <i>Microcryptus</i>)</p><p style="margin-left: 40px;"><i>exannulatus</i> (Roman, 1909, <i>Microcryptus</i>)</p>
300853	Animalia		Arthropoda			Insecta			Hymenoptera			Ichneumonoidea	Ichneumonidae	CRYPTINAE	HEMIGASTRINI		Oresbius		subguttatus				(Gravenhorst, 1829)	<p style="margin-left: 40px;"><i>Cryptus subguttatus</i> Gravenhorst, 1829</p><p style="margin-left: 40px;"><i>contracta</i> (Gravenhorst, 1829, <i>Cryptus</i>)</p><p style="margin-left: 40px;"><i>punctata</i> (Ratzeburg, 1844, <i>Cryptus</i>)</p><p style="margin-left: 40px;"><i>abscissa</i> (Ratzeburg, 1852, <i>Cryptus</i>)</p><p style="margin-left: 40px;"><i>incerta</i> (Ratzeburg, 1852, <i>Cry…							England, Ireland		Listed as a species of Aptesis by Yu &amp; Horstmann (1997).
300854	Animalia		Arthropoda			Insecta			Hymenoptera			Ichneumonoidea	Ichneumonidae	CRYPTINAE	HEMIGASTRINI		Parmortha						Townes, 1962
300855	Animalia		Arthropoda			Insecta			Hymenoptera			Ichneumonoidea	Ichneumonidae	CRYPTINAE	HEMIGASTRINI		Parmortha		parvula				(Gravenhorst, 1829)	<p style="margin-left: 40px;"><i>Cryptus parvulus</i> Gravenhorst, 1829</p><p style="margin-left: 40px;"><i>erythropus</i> (Gravenhorst, 1829, <i>Cryptus</i>)</p>							England, Scotland, Ireland
300856	Animalia		Arthropoda			Insecta			Hymenoptera			Ichneumonoidea	Ichneumonidae	CRYPTINAE	HEMIGASTRINI		Parmortha		pleuralis				(Thomson, 1873)	<p style="margin-left: 40px;"><i>Cratocryptus pleuralis</i> Thomson, 1873</p>							England, Scotland, Ireland, Isle of Man
300857	Animalia		Arthropoda			Insecta			Hymenoptera			Ichneumonoidea	Ichneumonidae	CRYPTINAE	HEMIGASTRINI		Plectocryptus						Thomson, 1873
300858	Animalia		Arthropoda			Insecta			Hymenoptera			Ichneumonoidea	Ichneumonidae	CRYPTINAE	HEMIGASTRINI		Plectocryptus		albulatorius				(Gravenhorst, 1829)	<p style="margin-left: 40px;"><i>Cryptus albulatorius</i> Gravenhorst, 1829</p><p style="margin-left: 40px;"><i>hilarulus</i> Schmiedeknecht, 1905</p>
300859	Animalia		Arthropoda			Insecta			Hymenoptera			Ichneumonoidea	Ichneumonidae	CRYPTINAE	HEMIGASTRINI		Plectocryptus		digitatus				(Gmelin, 1790)	<p style="margin-left: 40px;"><i>Ichneumon digitatus</i> Gmelin, 1790</p><p style="margin-left: 40px;"><i>bivinctus</i> (Gravenhorst, 1829, <i>Cryptus</i>)</p><p style="margin-left: 40px;"><i>poecilopus</i> (Rudow, 1883, <i>Cryptus</i>)</p><p style="margin-left: 40px;"><i>niger</i> (Kiss, 1926, <i>Habrocryptus</i>)</p>							England, Scotland
300860	Animalia		Arthropoda			Insecta			Hymenoptera			Ichneumonoidea	Ichneumonidae	CRYPTINAE	HEMIGASTRINI		Plectocryptus		effeminatus				(Gravenhorst, 1829)	<p style="margin-left: 40px;"><i>Cryptus effeminatus</i> Gravenhorst, 1829</p><p style="margin-left: 40px;"><i>flavopunctatus</i> (Bridgman, 1889, <i>Phygadeuon</i>)</p><p style="margin-left: 40px;"><i>armatus</i> (Kriechbaumer, 1893, <i>Microcryptus</i>)</p><p style="margin-left: 40px;"><i>clavatus</i> (Kriechbaumer, 1893, <i>Microcryptus</i>)</p><p style="margin-left: 40px;"><i>sellatus</i> Ulb…							England
300861	Animalia		Arthropoda			Insecta			Hymenoptera			Ichneumonoidea	Ichneumonidae	CRYPTINAE	HEMIGASTRINI		Plectocryptus		periculosus				(Schmiedeknecht, 1905)	<p style="margin-left: 40px;"><i>Microcryptus periculosus</i> Schmiedeknecht, 1905</p>							England		NMS, det. Schwarz, added here
300862	Animalia		Arthropoda			Insecta			Hymenoptera			Ichneumonoidea	Ichneumonidae	CRYPTINAE	HEMIGASTRINI		Pleolophus						Townes, 1962
300863	Animalia		Arthropoda			Insecta			Hymenoptera			Ichneumonoidea	Ichneumonidae	CRYPTINAE	HEMIGASTRINI		Pleolophus		basizonus				(Gravenhorst, 1829)	<p style="margin-left: 40px;"><i>Phygadeuon basizonus</i> Gravenhorst, 1829</p><p style="margin-left: 40px;"><i>larvincola</i> (Scharfenberg, 1805, <i>Ichneumon</i>)</p><p style="margin-left: 40px;"><i>varicolor</i> (Gravenhorst, 1829, <i>Cryptus</i>)</p><p style="margin-left: 40px;"><i>pteronum</i> (Hartig, 1838, <i>Phygadeuon</i>)</p><p style="margin-left: 40px;"><i>commutatus</i> (Ratzeburg, 1…							England, Scotland, Ireland
300864	Animalia		Arthropoda			Insecta			Hymenoptera			Ichneumonoidea	Ichneumonidae	CRYPTINAE	HEMIGASTRINI		Pleolophus		brachypterus				(Gravenhorst, 1815)	<p style="margin-left: 40px;"><i>Ichneumon brachypterus</i> Gravenhorst, 1815</p><p style="margin-left: 40px;"><i>micropterus</i> misident.</p><p style="margin-left: 40px;"><i>assimilis</i> (Förster, 1850, <i>Aptesis</i>)</p><p style="margin-left: 40px;"><i>curtulus</i> (Kriechbaumer, 1891, <i>Microcryptus</i>)</p><p style="margin-left: 40px;"><i>antennalis</i> (Kiss, 1924, <i>Habrocryptus</i>)</…							England, Scotland, Wales, Ireland, Isle of Man
300865	Animalia		Arthropoda			Insecta			Hymenoptera			Ichneumonoidea	Ichneumonidae	CRYPTINAE	HEMIGASTRINI		Pleolophus		sericans				(Gravenhorst, 1829)	<p style="margin-left: 40px;"><i>Phygadeuon sericans</i> Gravenhorst, 1829</p><p style="margin-left: 40px;"><i>pictus</i> (Gmelin, 1790, <i>Ichneumon</i>)</p><p style="margin-left: 40px;"><i>eximius</i> (Habermehl, 1935, <i>Microcryptus</i>)</p>							England, Ireland
300866	Animalia		Arthropoda			Insecta			Hymenoptera			Ichneumonoidea	Ichneumonidae	CRYPTINAE	HEMIGASTRINI		Pleolophus		vestigialis				(Förster, 1850)	<p style="margin-left: 40px;"><i>Aptesis vestigialis</i> Förster, 1850</p><p style="margin-left: 40px;"><i>aphyopterus</i> (Förster, 1850, <i>Aptesis</i>)</p><p style="margin-left: 40px;"><i>formosus</i> (Förster, 1850, <i>Aptesis</i>)</p><p style="margin-left: 40px;"><i>unifasciatus</i> (Schmiedeknecht, 1905, <i>Microcryptus</i>)</p><p style="margin-left: 40px;"><i>alpinus</i> (Rudow, 1917, <i>A…
300867	Animalia		Arthropoda			Insecta			Hymenoptera			Ichneumonoidea	Ichneumonidae	CRYPTINAE	HEMIGASTRINI		Rhembobius						Förster, 1869	<p style="margin-left: 40px;"><i>ULOTHYMUS</i> Förster, 1869</p><p style="margin-left: 40px;"><i>ACANTHOCRYPTUS</i> Thomson, 1873</p>									Since Townes (1970), Rhembobius has been placed in the Phygadeuontini, subtribe Ethelurgina, along with other parasitoids of syrphid (Diptera) larvae, but Quicke et al. (2009) always found Rhembobius to group with the Hemigastrini in their molecular phylogenetic analyses. Distribution data from Horstmann (2000a), Schwarz &amp; Shaw (2010), NHM, plus additional reference.
300868	Animalia		Arthropoda			Insecta			Hymenoptera			Ichneumonoidea	Ichneumonidae	CRYPTINAE	HEMIGASTRINI		Rhembobius		bifrons				(Gmelin, 1790)	<p style="margin-left: 40px;"><i>Ichneumon bifrons</i> Gmelin, 1790</p><p style="margin-left: 40px;"><i>rufoniger</i> (Bridgman, 1889, <i>Phygadeuon</i>)</p><p style="margin-left: 40px;"><i>minimus</i> (Lange, 1911, <i>Microcryptus</i>)</p>							England, Scotland, Wales, Ireland		Listed as a species of Aptesis by Fitton (1978).
300869	Animalia		Arthropoda			Insecta			Hymenoptera			Ichneumonoidea	Ichneumonidae	CRYPTINAE	HEMIGASTRINI		Rhembobius		perscrutator				(Thunberg, 1824)	<p style="margin-left: 40px;"><i>Ichneumon perscrutator</i> Thunberg, 1824</p><p style="margin-left: 40px;"><i>basalis</i> (Smith, 1874, <i>Cryptus</i>)</p>							England, Scotland, Wales, Ireland		some distribution data from Godfrey &amp; Whitehead (2001)
300870	Animalia		Arthropoda			Insecta			Hymenoptera			Ichneumonoidea	Ichneumonidae	CRYPTINAE	HEMIGASTRINI		Rhembobius		quadrispinus				(Gravenhorst, 1829)	<p style="margin-left: 40px;"><i>Phygadeuon quadrispinus</i> Gravenhorst, 1829</p><p style="margin-left: 40px;"><i>ambiguus</i> (Berthoumieu, 1914, <i>Platylabus</i>)</p><p style="margin-left: 40px;"><i>albicoxis</i> (Kiss, 1915, <i>Ryssolabus</i>)</p><p style="margin-left: 40px;"><i>limnophilus</i> (Smits$<i></i>)</p><p style="margin-left: 40px;"><i>nigrobasicus</i> (Kiss, 1924, <i>Acanthocryptu…							England, Scotland, Wales, Ireland, Isle of Man
300871	Animalia		Arthropoda			Insecta			Hymenoptera			Ichneumonoidea	Ichneumonidae	CRYPTINAE	HEMIGASTRINI		Schenkia						Förster, 1869	<p style="margin-left: 40px;"><i>ECPAGLUS</i> Förster, 1869</p><p style="margin-left: 40px;"><i>SCHENCKIA</i> Dalla Torre, 1901</p>
300872	Animalia		Arthropoda			Insecta			Hymenoptera			Ichneumonoidea	Ichneumonidae	CRYPTINAE	HEMIGASTRINI		Schenkia		graminicola				(Gravenhorst, 1829)	<p style="margin-left: 40px;"><i>Phygadeuon graminicola</i> Gravenhorst, 1829</p><p style="margin-left: 40px;"><i>brevicornis</i> (Gravenhorst, 1829, <i>Cryptus</i>)</p><p style="margin-left: 40px;"><i>humilis</i> (Gravenhorst, 1829, <i>Cryptus</i>)</p><p style="margin-left: 40px;"><i>alta</i> Jonaitis, 1981</p>							England, Scotland, Ireland
300873	Animalia		Arthropoda			Insecta			Hymenoptera			Ichneumonoidea	Ichneumonidae	CRYPTINAE	HEMIGASTRINI		Schenkia		labralis				(Gravenhorst, 1829)	<p style="margin-left: 40px;"><i>Phygadeuon labralis</i> Gravenhorst, 1829</p>							Ireland
300874	Animalia		Arthropoda			Insecta			Hymenoptera			Ichneumonoidea	Ichneumonidae	CRYPTINAE	HEMIGASTRINI		Schenkia		spinolae				(Gravenhorst, 1829)	<p style="margin-left: 40px;"><i>Phygadeuon spinolae</i> Gravenhorst, 1829</p>
300875	Animalia		Arthropoda			Insecta			Hymenoptera			Ichneumonoidea	Ichneumonidae	CRYPTINAE	PHYGADEUONTINI								Förster, 1869	<p style="margin-left: 40px;"><i>HEMITELINI</i> Förster, 1869</p><p style="margin-left: 40px;"><i>GELINI</i> Viereck, 1918</p>									Helcostizus is transferred here to the Cryptini, following the molecular phylogenetic results of Laurenne et al. (2006), which also accords better with its morphology, very aberrant within the Phygadeuontini. See notes under ‘Cryptini’. Distribution data mainly taken from Schwarz &amp; Shaw (1999, 2000, 2010, 2011), with some additional data from NHM, in particular, also UM and some type localiti…
300876	Animalia		Arthropoda			Insecta			Hymenoptera			Ichneumonoidea	Ichneumonidae	CRYPTINAE	PHYGADEUONTINI		Aclastus						Förster, 1869	<p style="margin-left: 40px;"><i>DAETORA</i> Förster, 1869</p><p style="margin-left: 40px;"><i>MICROPLEX</i> Förster, 1869</p><p style="margin-left: 40px;"><i>OPISTHOSTENUS</i> Förster, 1869</p><p style="margin-left: 40px;"><i>FETIALIS</i> Rossem, 1990</p>
300877	Animalia		Arthropoda			Insecta			Hymenoptera			Ichneumonoidea	Ichneumonidae	CRYPTINAE	PHYGADEUONTINI		Aclastus		borealis				(Boheman, 1866)	<p style="margin-left: 40px;"><i>Hemiteles borealis</i> Boheman, 1866</p><p style="margin-left: 40px;"><i>septentrionalis</i> (Holmgren, 1869, <i>Hemiteles</i>)</p>							Scotland		added by Horstmann (1980b)
300878	Animalia		Arthropoda			Insecta			Hymenoptera			Ichneumonoidea	Ichneumonidae	CRYPTINAE	PHYGADEUONTINI		Aclastus		eugracilis				Horstmann, 1980								England, Scotland, Wales		added by Schwarz &amp; Shaw (2000)
300879	Animalia		Arthropoda			Insecta			Hymenoptera			Ichneumonoidea	Ichneumonidae	CRYPTINAE	PHYGADEUONTINI		Aclastus		flavipes				Horstmann, 1980								England		added by Horstmann (1980b)
300880	Animalia		Arthropoda			Insecta			Hymenoptera			Ichneumonoidea	Ichneumonidae	CRYPTINAE	PHYGADEUONTINI		Aclastus		gracilis				(Thomson, 1884)	<p style="margin-left: 40px;"><i>Hemiteles gracilis</i> Thomson, 1884</p><p style="margin-left: 40px;"><i>furcifer</i> Hellén, 1967</p>							England, Scotland, Wales, Ireland, Isle of Man
300881	Animalia		Arthropoda			Insecta			Hymenoptera			Ichneumonoidea	Ichneumonidae	CRYPTINAE	PHYGADEUONTINI		Aclastus		micator				(Gravenhorst, 1807)	<p style="margin-left: 40px;"><i>Ichneumon micator</i> Gravenhorst, 1807</p><p style="margin-left: 40px;"><i>necator</i> misident.</p><p style="margin-left: 40px;"><i>caudator</i> Hellén, 1967</p>							England, Scotland, Wales		Listed, as necator (Fab.) (a name belonging to the Braconidae, Horstmann, 2001b), as a doubtfully placed species of Hemiteles by Fitton (1978); Morley’s (1907) redescription of necator refers partly to micator (Schwarz &amp; Shaw, 2000).
300882	Animalia		Arthropoda			Insecta			Hymenoptera			Ichneumonoidea	Ichneumonidae	CRYPTINAE	PHYGADEUONTINI		Aclastus		minutus				(Bridgman, 1886)	<p style="margin-left: 40px;"><i>Hemiteles minutus</i> Bridgman, 1886</p>							England, Scotland, Ireland		Irish occurrence from Anderson et al. (2006)
300883	Animalia		Arthropoda			Insecta			Hymenoptera			Ichneumonoidea	Ichneumonidae	CRYPTINAE	PHYGADEUONTINI		Aclastus		pilosus				Horstmann, 1980								England, Scotland, Wales, Ireland		added by Horstmann (1980b)
300884	Animalia		Arthropoda			Insecta			Hymenoptera			Ichneumonoidea	Ichneumonidae	CRYPTINAE	PHYGADEUONTINI		Aclastus		solutus				(Thomson, 1884)	<p style="margin-left: 40px;"><i>Hemiteles solutus</i> Thomson, 1884</p>							England, Scotland, Wales, Ireland
300885	Animalia		Arthropoda			Insecta			Hymenoptera			Ichneumonoidea	Ichneumonidae	CRYPTINAE	PHYGADEUONTINI		Aclastus		transversalis				Horstmann, 1980								England, Wales		added by Horstmann (1980b)
300886	Animalia		Arthropoda			Insecta			Hymenoptera			Ichneumonoidea	Ichneumonidae	CRYPTINAE	PHYGADEUONTINI		Acrolyta						Förster, 1869	<p style="margin-left: 40px;"><i>RHADINOCERA</i> Förster, 1869</p>
300887	Animalia		Arthropoda			Insecta			Hymenoptera			Ichneumonoidea	Ichneumonidae	CRYPTINAE	PHYGADEUONTINI		Acrolyta		flagellator				Schwarz &amp; Shaw, 2000								Scotland		added by Schwarz &amp; Shaw (2000)
300888	Animalia		Arthropoda			Insecta			Hymenoptera			Ichneumonoidea	Ichneumonidae	CRYPTINAE	PHYGADEUONTINI		Acrolyta		marginata				(Bridgman, 1883)	<p style="margin-left: 40px;"><i>Hemiteles marginatus</i> Bridgman, 1883</p>							England, Scotland
300889	Animalia		Arthropoda			Insecta			Hymenoptera			Ichneumonoidea	Ichneumonidae	CRYPTINAE	PHYGADEUONTINI		Acrolyta		nens				(Hartig, 1838)	<p style="margin-left: 40px;"><i>Hemiteles nens</i> Hartig, 1838</p><p style="margin-left: 40px;"><i>submarginata</i> (Bridgman, 1883, <i>Hemiteles</i>)</p><p style="margin-left: 40px;"><i>rufizonata</i> (Schmiedeknecht, 1905, <i>Hemiteles</i>)</p>							England, Scotland, Wales, Ireland
300890	Animalia		Arthropoda			Insecta			Hymenoptera			Ichneumonoidea	Ichneumonidae	CRYPTINAE	PHYGADEUONTINI		Acrolyta		okadai				(Uchida, 1942)	<p style="margin-left: 40px;"><i>Adiastola okadai</i> Uchida, 1942</p>									added by Schwarz &amp; Shaw (2000); transferred from Eudelus by Schwarz &amp; Shaw (2000).
300891	Animalia		Arthropoda			Insecta			Hymenoptera			Ichneumonoidea	Ichneumonidae	CRYPTINAE	PHYGADEUONTINI		Acrolyta		pseudonens				Schwarz &amp; Shaw, 2000								England, Scotland		added by Schwarz &amp; Shaw (2000)
300892	Animalia		Arthropoda			Insecta			Hymenoptera			Ichneumonoidea	Ichneumonidae	CRYPTINAE	PHYGADEUONTINI		Acrolyta		rufocincta				(Gravenhorst, 1829)	<p style="margin-left: 40px;"><i>Hemiteles rufocinctus</i> Gravenhorst, 1829</p><p style="margin-left: 40px;"><i>distincta</i> (Bridgman, 1883, <i>Hemiteles</i>)</p><p style="margin-left: 40px;"><i>capreolus</i> (Thomson, 1884, <i>Hemiteles</i>)</p><p style="margin-left: 40px;"><i>quadrimaculata</i> (Lange, 1911, <i>Hemiteles</i>)</p><p style="margin-left: 40px;"><i>obscurata</i> (Kiss, 1924, <i>…							England, Scotland, Wales		The name rufocincta was listed as a doubtfully placed species of Hemiteles by Fitton (1978) whilst the names distincta and capreola were listed as species of Acrolyta and Eudelus, respectively.
300893	Animalia		Arthropoda			Insecta			Hymenoptera			Ichneumonoidea	Ichneumonidae	CRYPTINAE	PHYGADEUONTINI		Acrolyta		semistrigosa				(Schmiedeknecht, 1897)	<p style="margin-left: 40px;"><i>Hemiteles semistrigosus</i> Schmiedeknecht, 1897</p>							England		added by Schwarz &amp; Shaw (2000)
300894	Animalia		Arthropoda			Insecta			Hymenoptera			Ichneumonoidea	Ichneumonidae	CRYPTINAE	PHYGADEUONTINI		Agasthenes						Förster, 1869	<p style="margin-left: 40px;"><i>ASTHENOPTERA</i> Förster, 1869</p>									Some distribution data from Townes (1983).
300895	Animalia		Arthropoda			Insecta			Hymenoptera			Ichneumonoidea	Ichneumonidae	CRYPTINAE	PHYGADEUONTINI		Agasthenes		subarcticus				(Jussila, 1965)	<p style="margin-left: 40px;"><i>Hemiteles subarcticus</i> Jussila, 1965</p>							Scotland, Ireland		added by Horstmann (1998a)
300896	Animalia		Arthropoda			Insecta			Hymenoptera			Ichneumonoidea	Ichneumonidae	CRYPTINAE	PHYGADEUONTINI		Agasthenes		varitarsus				(Gravenhorst, 1829)	<p style="margin-left: 40px;"><i>Hemiteles varitarsus</i> Gravenhorst, 1829</p><p style="margin-left: 40px;"><i>stagnalis</i> (Thomson, 1884, <i>Hemiteles</i>)</p>							England, Wales, Ireland
300897	Animalia		Arthropoda			Insecta			Hymenoptera			Ichneumonoidea	Ichneumonidae	CRYPTINAE	PHYGADEUONTINI		Amphibulus						Kriechbaumer, 1893										Some dstribution data from Sawoniewicz (1985).
300898	Animalia		Arthropoda			Insecta			Hymenoptera			Ichneumonoidea	Ichneumonidae	CRYPTINAE	PHYGADEUONTINI		Amphibulus		gracilis				Kriechbaumer, 1893	<p style="margin-left: 40px;"><i>bispinus</i> (Thomson, 1894, <i>Cratocryptus</i>)</p><p style="margin-left: 40px;"><i>aertsi</i> (Habermehl, 1926, <i>Stylocryptus</i>)</p>							England, Scotland, Ireland
300899	Animalia		Arthropoda			Insecta			Hymenoptera			Ichneumonoidea	Ichneumonidae	CRYPTINAE	PHYGADEUONTINI		Arotrephes						Townes, 1970										Some distribution data from Horstmann (1993b).
300900	Animalia		Arthropoda			Insecta			Hymenoptera			Ichneumonoidea	Ichneumonidae	CRYPTINAE	PHYGADEUONTINI		Arotrephes		laeviscutum				Horstmann, 1993								England		added by Horstmann (1993b)
300901	Animalia		Arthropoda			Insecta			Hymenoptera			Ichneumonoidea	Ichneumonidae	CRYPTINAE	PHYGADEUONTINI		Arotrephes		parvipennis				(Thomson, 1884)	<p style="margin-left: 40px;"><i>Phygadeuon parvipennis</i> Thomson, 1884</p>							England, Scotland		added by Horstmann (1993b)
300902	Animalia		Arthropoda			Insecta			Hymenoptera			Ichneumonoidea	Ichneumonidae	CRYPTINAE	PHYGADEUONTINI		Arotrephes		perfusor				(Gravenhorst, 1829)	<p style="margin-left: 40px;"><i>Cryptus perfusor</i> Gravenhorst, 1829</p><p style="margin-left: 40px;"><i>nitidus</i> (Bridgman, 1889, <i>Hemiteles</i>)</p>							England, Scotland, Ireland		Listed by Fitton (1978) as Charitopes nitidus (Bridg.).
300903	Animalia		Arthropoda			Insecta			Hymenoptera			Ichneumonoidea	Ichneumonidae	CRYPTINAE	PHYGADEUONTINI		Arotrephes		speculator				(Gravenhorst, 1829)	<p style="margin-left: 40px;"><i>Phygadeuon speculator</i> Gravenhorst, 1829</p>							England, Scotland, Ireland
300904	Animalia		Arthropoda			Insecta			Hymenoptera			Ichneumonoidea	Ichneumonidae	CRYPTINAE	PHYGADEUONTINI		Atractodes						Gravenhorst, 1829										Distribution data from Jussila (1979; 1983; 2001), and the collections of NMS (det. Jussila), with additional references given. doubtfully placed species of Atractodes [dionaeus Haliday, 1837 nom. nud. E I Fitton (1976)] [piceicornis Haliday, 1837 nom. nud. I Fitton (1976)] [salius Haliday, 1837 nom. nud. I Fitton (1976)] [vestalis Haliday, 1837 nom. nud.]
300905	Animalia		Arthropoda			Insecta			Hymenoptera			Ichneumonoidea	Ichneumonidae	CRYPTINAE	PHYGADEUONTINI		Atractodes	Asyncrita					Förster, 1876
300906	Animalia		Arthropoda			Insecta			Hymenoptera			Ichneumonoidea	Ichneumonidae	CRYPTINAE	PHYGADEUONTINI		Atractodes	Asyncrita	acuminator				Roman, 1909								England		added by Jussila (2001)
300907	Animalia		Arthropoda			Insecta			Hymenoptera			Ichneumonoidea	Ichneumonidae	CRYPTINAE	PHYGADEUONTINI		Atractodes	Asyncrita	albovinctus				Haliday, 1837	<p style="margin-left: 40px;"><i>mediatus</i> (Förster, 1876, <i>Asyncrita</i>)</p>							Ireland		Treated as a nomen nudum by Fitton (1976) but was established as a senior synonym of mediatus by Jussila (1994b).
300908	Animalia		Arthropoda			Insecta			Hymenoptera			Ichneumonoidea	Ichneumonidae	CRYPTINAE	PHYGADEUONTINI		Atractodes	Asyncrita	ambiguus				Ruthe, 1859	<p style="margin-left: 40px;"><i>truncator</i> Roman, 1909</p>							England
300909	Animalia		Arthropoda			Insecta			Hymenoptera			Ichneumonoidea	Ichneumonidae	CRYPTINAE	PHYGADEUONTINI		Atractodes	Asyncrita	angustipennis				Förster, 1876	<p style="margin-left: 40px;"><i>adversarius</i> Förster, 1876</p><p style="margin-left: 40px;"><i>affinis</i> Förster, 1876</p><p style="margin-left: 40px;"><i>cryptonastes</i> Förster, 1876</p><p style="margin-left: 40px;"><i>gracilentus</i> Förster, 1876</p><p style="margin-left: 40px;"><i>invalidus</i> Förster, 1876</p><p style="margin-left: 40px;"><i>subdentatus</i> Förster, 1876</p><p style…							Scotland, Ireland
300910	Animalia		Arthropoda			Insecta			Hymenoptera			Ichneumonoidea	Ichneumonidae	CRYPTINAE	PHYGADEUONTINI		Atractodes	Asyncrita	assimilis				Förster, 1876	<p style="margin-left: 40px;"><i>minusculus</i> Förster, 1876</p><p style="margin-left: 40px;"><i>sordidus</i> Förster, 1876</p><p style="margin-left: 40px;"><i>sponsus</i> Förster, 1876</p>							Scotland		added by Jussila (2001)
300911	Animalia		Arthropoda			Insecta			Hymenoptera			Ichneumonoidea	Ichneumonidae	CRYPTINAE	PHYGADEUONTINI		Atractodes	Asyncrita	croceicornis				Haliday, 1839	<p style="margin-left: 40px;"><i>acceptus</i> Förster, 1876</p><p style="margin-left: 40px;"><i>aemulator</i> Förster, 1876</p><p style="margin-left: 40px;"><i>alticola</i> Förster, 1876</p><p style="margin-left: 40px;"><i>atricornis</i> Förster, 1876</p><p style="margin-left: 40px;"><i>contrarius</i> Förster, 1876</p><p style="margin-left: 40px;"><i>designatus</i> Förster, 1876</p><p style="marg…							England, Scotland, Ireland, Isle of Man
300912	Animalia		Arthropoda			Insecta			Hymenoptera			Ichneumonoidea	Ichneumonidae	CRYPTINAE	PHYGADEUONTINI		Atractodes	Asyncrita	cryptobius				Förster, 1876	<p style="margin-left: 40px;"><i>eryptobius</i> misspelling</p><p style="margin-left: 40px;"><i>carinatus</i> Förster, 1876</p><p style="margin-left: 40px;"><i>conspicuus</i> Förster, 1876</p><p style="margin-left: 40px;"><i>custoditor</i> Förster, 1876</p><p style="margin-left: 40px;"><i>fulvicornis</i> Förster, 1876</p><p style="margin-left: 40px;"><i>parallelus</i> Thomson, 1884</p>							Ireland		added by Jussila (1979)
300913	Animalia		Arthropoda			Insecta			Hymenoptera			Ichneumonoidea	Ichneumonidae	CRYPTINAE	PHYGADEUONTINI		Atractodes	Asyncrita	cultellator				Haliday, 1839								Ireland
300914	Animalia		Arthropoda			Insecta			Hymenoptera			Ichneumonoidea	Ichneumonidae	CRYPTINAE	PHYGADEUONTINI		Atractodes	Asyncrita	exilis				Haliday, 1839	<p style="margin-left: 40px;"><i>alpicola</i> (Förster, 1876, <i>Asyncrita</i>)</p><p style="margin-left: 40px;"><i>angustulus</i> Förster, 1876</p><p style="margin-left: 40px;"><i>delicatulus</i> Förster, 1876</p><p style="margin-left: 40px;"><i>dispar</i> Förster, 1876</p><p style="margin-left: 40px;"><i>flavicoxis</i> Förster, 1876</p><p style="margin-left: 40px;"><i>longiventris</i> (Förster,…							England, Scotland, Ireland
300915	Animalia		Arthropoda			Insecta			Hymenoptera			Ichneumonoidea	Ichneumonidae	CRYPTINAE	PHYGADEUONTINI		Atractodes	Asyncrita	exitialis				Förster, 1876	<p style="margin-left: 40px;"><i>breviusculus</i> Förster, 1876</p><p style="margin-left: 40px;"><i>callidus</i> Förster, 1876</p><p style="margin-left: 40px;"><i>debilis</i> Förster, 1876</p><p style="margin-left: 40px;"><i>difformis</i> Förster, 1876</p><p style="margin-left: 40px;"><i>infimus</i> Förster, 1876</p><p style="margin-left: 40px;"><i>parilis</i> Förster, 1876</p><p style="margin-le…							Scotland		added by Jussila (2001)
300916	Animalia		Arthropoda			Insecta			Hymenoptera			Ichneumonoidea	Ichneumonidae	CRYPTINAE	PHYGADEUONTINI		Atractodes	Asyncrita	foveolatus				Gravenhorst, 1829	<p style="margin-left: 40px;"><i>canaliculatus</i> (Hellén, 1944, <i>Asyncrita</i>)</p>							England
300917	Animalia		Arthropoda			Insecta			Hymenoptera			Ichneumonoidea	Ichneumonidae	CRYPTINAE	PHYGADEUONTINI		Atractodes	Asyncrita	picipes				Holmgren, 1860	<p style="margin-left: 40px;"><i>nigripes</i> Förster, 1876</p>
300918	Animalia		Arthropoda			Insecta			Hymenoptera			Ichneumonoidea	Ichneumonidae	CRYPTINAE	PHYGADEUONTINI		Atractodes	Asyncrita	spiraculator				Roman, 1918								Scotland		added by Jussila (2001)
300919	Animalia		Arthropoda			Insecta			Hymenoptera			Ichneumonoidea	Ichneumonidae	CRYPTINAE	PHYGADEUONTINI		Atractodes	Atractodes					Gravenhorst, 1829	<p style="margin-left: 40px;"><i>ZETESIMA</i> Förster, 1876</p>
300920	Animalia		Arthropoda			Insecta			Hymenoptera			Ichneumonoidea	Ichneumonidae	CRYPTINAE	PHYGADEUONTINI		Atractodes	Atractodes	alpestris				Roman, 1918								Ireland		added by Jussila (1979)
300921	Animalia		Arthropoda			Insecta			Hymenoptera			Ichneumonoidea	Ichneumonidae	CRYPTINAE	PHYGADEUONTINI		Atractodes	Atractodes	arator				Haliday, 1839	<p style="margin-left: 40px;"><i>rufiventris</i> Strobl, 1901</p>							Scotland, Ireland
300922	Animalia		Arthropoda			Insecta			Hymenoptera			Ichneumonoidea	Ichneumonidae	CRYPTINAE	PHYGADEUONTINI		Atractodes	Atractodes	bicolor				Gravenhorst, 1829	<p style="margin-left: 40px;"><i>pygmaeator</i> (Zetterstedt, 1838, <i>Ichneumon</i>)</p><p style="margin-left: 40px;"><i>alpigradus</i> Förster, 1876</p><p style="margin-left: 40px;"><i>analogus</i> Förster, 1876</p><p style="margin-left: 40px;"><i>cultrarius</i> Förster, 1876</p><p style="margin-left: 40px;"><i>destructor</i> Förster, 1876</p><p style="margin-left: 40px;"><i>incommodus</i> Förs…							Scotland
300923	Animalia		Arthropoda			Insecta			Hymenoptera			Ichneumonoidea	Ichneumonidae	CRYPTINAE	PHYGADEUONTINI		Atractodes	Atractodes	citator				Haliday, 1839								Ireland
300924	Animalia		Arthropoda			Insecta			Hymenoptera			Ichneumonoidea	Ichneumonidae	CRYPTINAE	PHYGADEUONTINI		Atractodes	Atractodes	fumatus				Haliday, 1839	<p style="margin-left: 40px;"><i>abnormis</i> Förster, 1876</p><p style="margin-left: 40px;"><i>ambifarius</i> Förster, 1876</p><p style="margin-left: 40px;"><i>avidus</i> Förster, 1876</p><p style="margin-left: 40px;"><i>castus</i> Förster, 1876</p><p style="margin-left: 40px;"><i>discolor</i> Förster, 1876</p><p style="margin-left: 40px;"><i>dissidens</i> Förster, 1876</p><p style="margin-left:…							England, Scotland
300925	Animalia		Arthropoda			Insecta			Hymenoptera			Ichneumonoidea	Ichneumonidae	CRYPTINAE	PHYGADEUONTINI		Atractodes	Atractodes	gilvipes				Holmgren, 1860
300926	Animalia		Arthropoda			Insecta			Hymenoptera			Ichneumonoidea	Ichneumonidae	CRYPTINAE	PHYGADEUONTINI		Atractodes	Atractodes	gravidus				Gravenhorst, 1829	<p style="margin-left: 40px;"><i>fraternus</i> Förster, 1876</p><p style="margin-left: 40px;"><i>areolaris</i> (Habermehl, 1909, <i>Exolytus</i>)</p><p style="margin-left: 40px;"><i>archangelicae</i> Roman, 1913</p><p style="margin-left: 40px;"><i>brevicornis</i> Bauer, 1958</p>							England
300927	Animalia		Arthropoda			Insecta			Hymenoptera			Ichneumonoidea	Ichneumonidae	CRYPTINAE	PHYGADEUONTINI		Atractodes	Atractodes	magnus				Jussila, 2001								England		Ely coll., det Jussila, added here
300928	Animalia		Arthropoda			Insecta			Hymenoptera			Ichneumonoidea	Ichneumonidae	CRYPTINAE	PHYGADEUONTINI		Atractodes	Atractodes	obsoletor				(Zetterstedt, 1838)	<p style="margin-left: 40px;"><i>Porizon obsoletor</i> Zetterstedt, 1838</p><p style="margin-left: 40px;"><i>agilis</i> Förster, 1876</p><p style="margin-left: 40px;"><i>declinis</i> Förster, 1876</p><p style="margin-left: 40px;"><i>neophytus</i> Förster, 1876</p><p style="margin-left: 40px;"><i>niger</i> Förster, 1876</p><p style="margin-left: 40px;"><i>foersteri</i> Dalla Torre, 1901</p>							England, Wales		added by Jussila (1979)
300929	Animalia		Arthropoda			Insecta			Hymenoptera			Ichneumonoidea	Ichneumonidae	CRYPTINAE	PHYGADEUONTINI		Atractodes	Atractodes	pauxillus				Förster, 1876	<p style="margin-left: 40px;"><i>montanus</i> Förster, 1876</p><p style="margin-left: 40px;"><i>breviscapus</i> Thomson, 1884</p>							England, Scotland, Ireland
300930	Animalia		Arthropoda			Insecta			Hymenoptera			Ichneumonoidea	Ichneumonidae	CRYPTINAE	PHYGADEUONTINI		Atractodes	Atractodes	pusillus				Förster, 1876	<p style="margin-left: 40px;"><i>calceatus</i> Förster, 1876</p><p style="margin-left: 40px;"><i>linearis</i> Förster, 1876</p><p style="margin-left: 40px;"><i>tenellus</i> Förster, 1876</p><p style="margin-left: 40px;"><i>liogaster</i> Förster, 1876</p><p style="margin-left: 40px;"><i>pernitens</i> Kokujev, 1909</p>							England, Scotland, Ireland
300931	Animalia		Arthropoda			Insecta			Hymenoptera			Ichneumonoidea	Ichneumonidae	CRYPTINAE	PHYGADEUONTINI		Atractodes	Atractodes	tenuipes				Thomson, 1884								England, Scotland		added by Bass &amp; Cooling (1983)
300932	Animalia		Arthropoda			Insecta			Hymenoptera			Ichneumonoidea	Ichneumonidae	CRYPTINAE	PHYGADEUONTINI		Atractodes	Atractodes	townesi				Jussila, 1983	<p style="margin-left: 40px;"><i>thomsoni</i> Jussila, 1979</p>							Scotland		added by Jussila (2001)
300933	Animalia		Arthropoda			Insecta			Hymenoptera			Ichneumonoidea	Ichneumonidae	CRYPTINAE	PHYGADEUONTINI		Atractodes	Cyclaulatractodes					Jussila, 1979
300934	Animalia		Arthropoda			Insecta			Hymenoptera			Ichneumonoidea	Ichneumonidae	CRYPTINAE	PHYGADEUONTINI		Atractodes	Cyclaulatractodes	helveticus				Förster, 1876	<p style="margin-left: 40px;"><i>aequilongus</i> Förster, 1876</p><p style="margin-left: 40px;"><i>oreophilus</i> Förster, 1876</p>							Ireland
300935	Animalia		Arthropoda			Insecta			Hymenoptera			Ichneumonoidea	Ichneumonidae	CRYPTINAE	PHYGADEUONTINI		Atractodes	Cyclaulatractodes	punctator				Roman, 1909								England, Scotland, Wales		added by Jussila (2001)
300936	Animalia		Arthropoda			Insecta			Hymenoptera			Ichneumonoidea	Ichneumonidae	CRYPTINAE	PHYGADEUONTINI		Atractodes	Hadratractodes					Jussila, 1979
300937	Animalia		Arthropoda			Insecta			Hymenoptera			Ichneumonoidea	Ichneumonidae	CRYPTINAE	PHYGADEUONTINI		Atractodes	Hadratractodes	vicinus				Förster, 1876	<p style="margin-left: 40px;"><i>absconditus</i> Förster, 1876</p><p style="margin-left: 40px;"><i>cautior</i> Förster, 1876</p><p style="margin-left: 40px;"><i>inquilinus</i> Förster, 1876</p><p style="margin-left: 40px;"><i>intersectus</i> Förster, 1876</p><p style="margin-left: 40px;"><i>lentus</i> Förster, 1876</p><p style="margin-left: 40px;"><i>rufipes</i> Förster, 1876</p><p style="margin-…							Scotland
300938	Animalia		Arthropoda			Insecta			Hymenoptera			Ichneumonoidea	Ichneumonidae	CRYPTINAE	PHYGADEUONTINI		Atractodes	Rugratractodes					Jussila, 1979
300939	Animalia		Arthropoda			Insecta			Hymenoptera			Ichneumonoidea	Ichneumonidae	CRYPTINAE	PHYGADEUONTINI		Atractodes	Rugratractodes	alpinus				Förster, 1876	<p style="margin-left: 40px;"><i>inimicus</i> Förster, 1876</p>							Scotland		added by Jussila (2001)
300940	Animalia		Arthropoda			Insecta			Hymenoptera			Ichneumonoidea	Ichneumonidae	CRYPTINAE	PHYGADEUONTINI		Atractodes	Rugratractodes	incrassator				Roman, 1926								Scotland		added by Jussila (2001)
300941	Animalia		Arthropoda			Insecta			Hymenoptera			Ichneumonoidea	Ichneumonidae	CRYPTINAE	PHYGADEUONTINI		Bathythrix						Förster, 1869	<p style="margin-left: 40px;"><i>GAUSOCENTRUS</i> Förster, 1869</p><p style="margin-left: 40px;"><i>ISCHNURGOPS</i> Förster, 1869</p><p style="margin-left: 40px;"><i>PANARGYROPS</i> Förster, 1869</p><p style="margin-left: 40px;"><i>STEGANOPS</i> Förster, 1869</p><p style="margin-left: 40px;"><i>LEPTOCRYPTUS</i> Thomson, 1873</p>									Some distribution data from Sawoniewicz (1980).
300942	Animalia		Arthropoda			Insecta			Hymenoptera			Ichneumonoidea	Ichneumonidae	CRYPTINAE	PHYGADEUONTINI		Bathythrix		aerea				(Gravenhorst, 1829)	<p style="margin-left: 40px;"><i>Cryptus aereus</i> Gravenhorst, 1829</p><p style="margin-left: 40px;"><i>brevis</i> (Thomson, 1884, <i>Leptocryptus</i>)</p>							England, Scotland, Wales, Ireland
300943	Animalia		Arthropoda			Insecta			Hymenoptera			Ichneumonoidea	Ichneumonidae	CRYPTINAE	PHYGADEUONTINI		Bathythrix		alter				(Kerrich, 1942)	<p style="margin-left: 40px;"><i>Panargyrops alter</i> Kerrich, 1942</p>							England, Wales
300944	Animalia		Arthropoda			Insecta			Hymenoptera			Ichneumonoidea	Ichneumonidae	CRYPTINAE	PHYGADEUONTINI		Bathythrix		argentata				(Gravenhorst, 1829)	<p style="margin-left: 40px;"><i>Hemiteles argentatus</i> Gravenhorst, 1829</p><p style="margin-left: 40px;"><i>lacustris</i> (Schmiedeknecht, 1905, <i>Leptocryptus</i>)</p>							England
300945	Animalia		Arthropoda			Insecta			Hymenoptera			Ichneumonoidea	Ichneumonidae	CRYPTINAE	PHYGADEUONTINI		Bathythrix		claviger				(Taschenberg, 1865)	<p style="margin-left: 40px;"><i>Cryptus claviger</i> Taschenberg, 1865</p><p style="margin-left: 40px;"><i>atra</i> (Brischke, 1881, <i>Cryptus</i>)</p>							England, Scotland, Ireland
300946	Animalia		Arthropoda			Insecta			Hymenoptera			Ichneumonoidea	Ichneumonidae	CRYPTINAE	PHYGADEUONTINI		Bathythrix		collaris				(Thomson, 1896)	<p style="margin-left: 40px;"><i>Leptocryptus collaris</i> Thomson, 1896</p>							England, Scotland
300947	Animalia		Arthropoda			Insecta			Hymenoptera			Ichneumonoidea	Ichneumonidae	CRYPTINAE	PHYGADEUONTINI		Bathythrix		decipiens				(Gravenhorst, 1829)	<p style="margin-left: 40px;"><i>Hemiteles decipiens</i> Gravenhorst, 1829</p><p style="margin-left: 40px;"><i>gyrini</i> (Parfitt, 1881, <i>Hemiteles</i>)</p><p style="margin-left: 40px;"><i>signata</i> (Habermehl, 1919, <i>Leptocryptus</i>)</p><p style="margin-left: 40px;"><i>meridionator</i> (Aubert, 1960, <i>Panargyrops</i>)</p>							England, Ireland, Isle of Man		Listed (twice, as decipiens and gyrini) as doubtfully placed species of Hemiteles in Fitton (1978).
300948	Animalia		Arthropoda			Insecta			Hymenoptera			Ichneumonoidea	Ichneumonidae	CRYPTINAE	PHYGADEUONTINI		Bathythrix		formosa				(Desvignes, 1860)	<p style="margin-left: 40px;"><i>Hemiteles formosus</i> Desvignes, 1860</p><p style="margin-left: 40px;"><i>albomarginata</i> (Kriechbaumer, 1892, <i>Leptocryptus</i>)</p><p style="margin-left: 40px;"><i>?grandimacula</i> (Kriechbaumer, 1892, <i>Leptocryptus</i>)</p><p style="margin-left: 40px;"><i>geniculosa</i> (Thomson, 1884, <i>Leptocryptus</i>)</p>							England		Bathythrix formosa was separated from fragilis by Horstmann (1998a).
300949	Animalia		Arthropoda			Insecta			Hymenoptera			Ichneumonoidea	Ichneumonidae	CRYPTINAE	PHYGADEUONTINI		Bathythrix		fragilis				(Gravenhorst, 1829)	<p style="margin-left: 40px;"><i>Hemiteles fragilis</i> Gravenhorst, 1829</p><p style="margin-left: 40px;"><i>bellula</i> (Kriechbaumer, 1892, <i>Leptocryptus</i>)</p><p style="margin-left: 40px;"><i>urticarum</i> (Habermehl, 1920, <i>Leptocryptus</i>)</p>							England, Scotland, Wales
300950	Animalia		Arthropoda			Insecta			Hymenoptera			Ichneumonoidea	Ichneumonidae	CRYPTINAE	PHYGADEUONTINI		Bathythrix		lamina				(Thomson, 1884)	<p style="margin-left: 40px;"><i>Leptocryptus lamina</i> Thomson, 1884</p>							England, Scotland, Wales, Ireland, Isle of Man		some distribution data from Kerrich (1942)
300951	Animalia		Arthropoda			Insecta			Hymenoptera			Ichneumonoidea	Ichneumonidae	CRYPTINAE	PHYGADEUONTINI		Bathythrix		linearis				(Gravenhorst, 1829)	<p style="margin-left: 40px;"><i>Nematopodius linearis</i> Gravenhorst, 1829</p><p style="margin-left: 40px;"><i>heteropus</i> (Thomson, 1886, <i>Leptocryptus</i>)</p>							England
300952	Animalia		Arthropoda			Insecta			Hymenoptera			Ichneumonoidea	Ichneumonidae	CRYPTINAE	PHYGADEUONTINI		Bathythrix		margaretae				Sawoniewicz, 1980								England		added by Schwarz &amp; Shaw (2010)
300953	Animalia		Arthropoda			Insecta			Hymenoptera			Ichneumonoidea	Ichneumonidae	CRYPTINAE	PHYGADEUONTINI		Bathythrix		pellucidator				(Gravenhorst, 1829)	<p style="margin-left: 40px;"><i>Cryptus pellucidator</i> Gravenhorst, 1829</p><p style="margin-left: 40px;"><i>ruficaudata</i> (Bridgman, 1883, <i>Hemiteles</i>)</p>							England, Scotland, Wales, Ireland, Isle of Man
300954	Animalia		Arthropoda			Insecta			Hymenoptera			Ichneumonoidea	Ichneumonidae	CRYPTINAE	PHYGADEUONTINI		Bathythrix		prominens				(Strobl, 1901)	<p style="margin-left: 40px;"><i>Leptocryptus prominens</i> Strobl, 1901</p>							England, Scotland, Wales, Ireland, Isle of Man		added by Sawoniewicz (1980)
300955	Animalia		Arthropoda			Insecta			Hymenoptera			Ichneumonoidea	Ichneumonidae	CRYPTINAE	PHYGADEUONTINI		Bathythrix		rugulosa				(Thomson, 1884)	<p style="margin-left: 40px;"><i>Leptocryptus rugulosus</i> Thomson, 1884</p>							England, Scotland, Ireland		added by Sawoniewicz (1980)
300956	Animalia		Arthropoda			Insecta			Hymenoptera			Ichneumonoidea	Ichneumonidae	CRYPTINAE	PHYGADEUONTINI		Bathythrix		spheginus				(Gravenhorst, 1829)	<p style="margin-left: 40px;"><i>Mesoleptus spheginus</i> Gravenhorst, 1829</p><p style="margin-left: 40px;"><i>sphecinus</i> (Schulz, 1906, <i>Mesoleptus</i>)</p>							England		added by Sawoniewicz (1980)
300957	Animalia		Arthropoda			Insecta			Hymenoptera			Ichneumonoidea	Ichneumonidae	CRYPTINAE	PHYGADEUONTINI		Bathythrix		strigosa				(Thomson, 1884)	<p style="margin-left: 40px;"><i>Leptocryptus strigosus</i> Thomson, 1884</p><p style="margin-left: 40px;"><i>ruficollis</i> (Habermehl, 1919, <i>Leptocryptus</i>)</p>							England, Scotland		added by Schwarz &amp; Shaw (2010)
300958	Animalia		Arthropoda			Insecta			Hymenoptera			Ichneumonoidea	Ichneumonidae	CRYPTINAE	PHYGADEUONTINI		Bathythrix		tenuis				(Gravenhorst, 1829)	<p style="margin-left: 40px;"><i>Cryptus tenuis</i> Gravenhorst, 1829</p><p style="margin-left: 40px;"><i>rubens</i> (Kriechbaumer, 1892, <i>Leptocryptus</i>)</p>
300959	Animalia		Arthropoda			Insecta			Hymenoptera			Ichneumonoidea	Ichneumonidae	CRYPTINAE	PHYGADEUONTINI		Bathythrix		thomsoni				(Kerrich, 1942)	<p style="margin-left: 40px;"><i>Thysiotorus thomsoni</i> Kerrich, 1942</p><p style="margin-left: 40px;"><i>corsicator</i> (Aubert, 1961, <i>Panargyrops</i>)</p>							England, Scotland, Wales, Ireland, Isle of Man
300960	Animalia		Arthropoda			Insecta			Hymenoptera			Ichneumonoidea	Ichneumonidae	CRYPTINAE	PHYGADEUONTINI		Blapsidotes						Förster, 1869
300961	Animalia		Arthropoda			Insecta			Hymenoptera			Ichneumonoidea	Ichneumonidae	CRYPTINAE	PHYGADEUONTINI		Blapsidotes		vicinus				(Gravenhorst, 1829)	<p style="margin-left: 40px;"><i>Hemiteles vicinus</i> Gravenhorst, 1829</p><p style="margin-left: 40px;"><i>melanarius</i> (Gravenhorst, 1829, <i>Hemiteles</i>)</p><p style="margin-left: 40px;"><i>pimplarius</i> (Berthoumieu, 1904, <i>Platylabus</i>)</p>							England, Scotland, Ireland		Listed (as melanarius) as a doubtfully placed species of Hemiteles by Fitton (1978).
300962	Animalia		Arthropoda			Insecta			Hymenoptera			Ichneumonoidea	Ichneumonidae	CRYPTINAE	PHYGADEUONTINI		Cephalobaris						Kryger, 1915
300963	Animalia		Arthropoda			Insecta			Hymenoptera			Ichneumonoidea	Ichneumonidae	CRYPTINAE	PHYGADEUONTINI		Cephalobaris		eskelundi				Kryger, 1915								England		added by Schwarz &amp; Shaw (2011)
300964	Animalia		Arthropoda			Insecta			Hymenoptera			Ichneumonoidea	Ichneumonidae	CRYPTINAE	PHYGADEUONTINI		Ceratophygadeuon						Viereck, 1924	<p style="margin-left: 40px;"><i>EUROMONZIA</i> Aubert, 1965</p>
300965	Animalia		Arthropoda			Insecta			Hymenoptera			Ichneumonoidea	Ichneumonidae	CRYPTINAE	PHYGADEUONTINI		Ceratophygadeuon		bellus				(Gravenhorst, 1829)	<p style="margin-left: 40px;"><i>Ichneumon bellus</i> Gravenhorst, 1829</p><p style="margin-left: 40px;"><i>longiceps</i> (Thomson, 1884, <i>Phygadeuon</i>)</p>									Not included in Fitton’s (1978) checklist but described from a British specimen.
300966	Animalia		Arthropoda			Insecta			Hymenoptera			Ichneumonoidea	Ichneumonidae	CRYPTINAE	PHYGADEUONTINI		Ceratophygadeuon		gracilicornis				Horstmann, 1979								England		added by Schwarz &amp; Shaw (2011)
300967	Animalia		Arthropoda			Insecta			Hymenoptera			Ichneumonoidea	Ichneumonidae	CRYPTINAE	PHYGADEUONTINI		Ceratophygadeuon		?parvicaudator				(Aubert, 1965)	<p style="margin-left: 40px;"><i>Remonzia ?parvicaudator</i> Aubert, 1965</p>							England		added by Schwarz &amp; Shaw (2011); tentative identification
300968	Animalia		Arthropoda			Insecta			Hymenoptera			Ichneumonoidea	Ichneumonidae	CRYPTINAE	PHYGADEUONTINI		Ceratophygadeuon		varicornis				(Thomson, 1885)	<p style="margin-left: 40px;"><i>Phygadeuon varicornis</i> Thomson, 1885</p><p style="margin-left: 40px;"><i>maritimus</i> Horstmann, 1979</p>							England		added by Horstmann (1993a)
300969	Animalia		Arthropoda			Insecta			Hymenoptera			Ichneumonoidea	Ichneumonidae	CRYPTINAE	PHYGADEUONTINI		Charitopes						Förster, 1869	<p style="margin-left: 40px;"><i>ADIASTOLA</i> Förster, 1869</p>									Some distribution data from Townes (1983) and Horstmann (1998a).
300970	Animalia		Arthropoda			Insecta			Hymenoptera			Ichneumonoidea	Ichneumonidae	CRYPTINAE	PHYGADEUONTINI		Charitopes		areolaris				(Thomson, 1884)	<p style="margin-left: 40px;"><i>Hemiteles areolaris</i> Thomson, 1884</p><p style="margin-left: 40px;"><i>brunneus</i> (Morley, 1907, <i>Hemiteles</i>)</p>							England, Scotland
300971	Animalia		Arthropoda			Insecta			Hymenoptera			Ichneumonoidea	Ichneumonidae	CRYPTINAE	PHYGADEUONTINI		Charitopes		carri				(Roman, 1923)	<p style="margin-left: 40px;"><i>Cecidonomus carri</i> Roman, 1923</p><p style="margin-left: 40px;"><i>londinensis</i> (Morley, 1947, <i>Phygadeuon</i>)</p><p style="margin-left: 40px;"><i>hemerobii</i> (Pfankuch, 1914, <i>Hemiteles</i>)</p><p style="margin-left: 40px;"><i>pusillus</i> (Habermehl, 1920, <i>Hemiteles</i>)</p>							England, Scotland, Isle of Man		Horstmann (1998a) removed carri from synonymy with areolaris.
300972	Animalia		Arthropoda			Insecta			Hymenoptera			Ichneumonoidea	Ichneumonidae	CRYPTINAE	PHYGADEUONTINI		Charitopes		clausus				(Thomson, 1888)	<p style="margin-left: 40px;"><i>Hemiteles clausus</i> Thomson, 1888</p>							England, Scotland, Ireland, Isle of Man		added by Townes (1983)
300973	Animalia		Arthropoda			Insecta			Hymenoptera			Ichneumonoidea	Ichneumonidae	CRYPTINAE	PHYGADEUONTINI		Charitopes		gastricus				(Holmgren, 1868)	<p style="margin-left: 40px;"><i>Hemiteles gastricus</i> Holmgren, 1868</p><p style="margin-left: 40px;"><i>chrysopae</i> (Brischke, 1890, <i>Hemiteles</i>)</p><p style="margin-left: 40px;"><i>flavigaster</i> (Schmiedekecht, 1897, <i>Hemiteles</i>)</p><p style="margin-left: 40px;"><i>flavocinctus</i> (Strobl, 1901, <i>Hemiteles</i>)</p><p style="margin-left: 40px;"><i>brunnescens</i> (Schmiedekec…							England, Scotland, Wales, Ireland
300974	Animalia		Arthropoda			Insecta			Hymenoptera			Ichneumonoidea	Ichneumonidae	CRYPTINAE	PHYGADEUONTINI		Charitopes		wesmaeliicida				(Roman, 1934)	<p style="margin-left: 40px;"><i>Hemiteles wesmaeliicida</i> Roman, 1934</p>							England, Scotland
300975	Animalia		Arthropoda			Insecta			Hymenoptera			Ichneumonoidea	Ichneumonidae	CRYPTINAE	PHYGADEUONTINI		Chirotica						Förster, 1869	<p style="margin-left: 40px;"><i>ALLOCOTA</i> Förster, 1869</p><p style="margin-left: 40px;"><i>DIAGLYPTA</i> Förster, 1869</p><p style="margin-left: 40px;"><i>SPINOLIA</i> Förster, 1869</p><p style="margin-left: 40px;"><i>SYNECHES</i> Förster, 1869</p><p style="margin-left: 40px;"><i>DEUTEROSPINOLIA</i> Dalla Torre, 1902</p>
300976	Animalia		Arthropoda			Insecta			Hymenoptera			Ichneumonoidea	Ichneumonidae	CRYPTINAE	PHYGADEUONTINI		Chirotica		maculipennis				(Gravenhorst, 1829)	<p style="margin-left: 40px;"><i>Hemiteles maculipennis</i> Gravenhorst, 1829</p><p style="margin-left: 40px;"><i>excellens</i> (Imhoff, 1850, <i>Hemiteles</i>)</p><p style="margin-left: 40px;"><i>mulsantii</i> (Fonscolombe, 1852, <i>Hemiteles</i>)</p><p style="margin-left: 40px;"><i>glyptonota</i> (Thomson, 1885, <i>Hemiteles</i>)</p><p style="margin-left: 40px;"><i>schiefereri</i> (Strobl, 1904…							England		Listed as a doubtfully placed species of Hemiteles by Fitton (1978).
300977	Animalia		Arthropoda			Insecta			Hymenoptera			Ichneumonoidea	Ichneumonidae	CRYPTINAE	PHYGADEUONTINI		Clypeoteles						Horstmann, 1974
300978	Animalia		Arthropoda			Insecta			Hymenoptera			Ichneumonoidea	Ichneumonidae	CRYPTINAE	PHYGADEUONTINI		Clypeoteles		distans				(Thomson, 1884)	<p style="margin-left: 40px;"><i>Hemiteles distans</i> Thomson, 1884</p><p style="margin-left: 40px;"><i>rugifrons</i> (Thomson, 1884, <i>Hemiteles</i>)</p><p style="margin-left: 40px;"><i>pseudorubiginosus</i> (Strobl, 1901, <i>Hemiteles</i>)</p><p style="margin-left: 40px;"><i>xylonomoides</i> (Morley, 1907, <i>Cecidonomus</i>)</p><p style="margin-left: 40px;"><i>fennicus</i> (Hellén, 1967, <i>…							England, Scotland		Listed as Acrolyta xylonomoides by Fitton (1978).
300979	Animalia		Arthropoda			Insecta			Hymenoptera			Ichneumonoidea	Ichneumonidae	CRYPTINAE	PHYGADEUONTINI		Cremnodes						Förster, 1850	<p style="margin-left: 40px;"><i>CAENOMERIS</i> Förster, 1869</p><p style="margin-left: 40px;"><i>STYGERA</i> Förster, 1869</p><p style="margin-left: 40px;"><i>CREMNIAS</i> Roman, 1939</p>
300980	Animalia		Arthropoda			Insecta			Hymenoptera			Ichneumonoidea	Ichneumonidae	CRYPTINAE	PHYGADEUONTINI		Cremnodes		atricapillus				(Gravenhorst, 1815)	<p style="margin-left: 40px;"><i>Icheumon atricapillus</i> Gravenhorst, 1815</p><p style="margin-left: 40px;"><i>combustus</i> Förster, 1850</p><p style="margin-left: 40px;"><i>nanodes</i> Förster, 1850</p>							England, Scotland, Wales, Ireland		some distribution data from Horstmann (1993b)
300981	Animalia		Arthropoda			Insecta			Hymenoptera			Ichneumonoidea	Ichneumonidae	CRYPTINAE	PHYGADEUONTINI		Cremnodes		costalis				Horstmann, 1992								England, Scotland		added by Horstmann (1992a)
300982	Animalia		Arthropoda			Insecta			Hymenoptera			Ichneumonoidea	Ichneumonidae	CRYPTINAE	PHYGADEUONTINI		Cremnodes		rufipes				(Perkins, 1962)	<p style="margin-left: 40px;"><i>Stygera rufipes</i> Perkins, 1962</p>							England, Wales		some distribution data from Perkins (1962)
300983	Animalia		Arthropoda			Insecta			Hymenoptera			Ichneumonoidea	Ichneumonidae	CRYPTINAE	PHYGADEUONTINI		Diaglyptidea						Viereck, 1913
300984	Animalia		Arthropoda			Insecta			Hymenoptera			Ichneumonoidea	Ichneumonidae	CRYPTINAE	PHYGADEUONTINI		Diaglyptidea		conformis				(Gmelin, 1790)	<p style="margin-left: 40px;"><i>Ichneumon conformis</i> Gmelin, 1790</p><p style="margin-left: 40px;"><i>secernenda</i> (Schmiedeknecht, 1897, <i>Hemiteles</i>)</p>							England, Scotland, Ireland, Isle of Man
300985	Animalia		Arthropoda			Insecta			Hymenoptera			Ichneumonoidea	Ichneumonidae	CRYPTINAE	PHYGADEUONTINI		Dichrogaster						Doumerc, 1855	<p style="margin-left: 40px;"><i>BRACHYCEPHALUS</i> Förster, 1869</p><p style="margin-left: 40px;"><i>MICROTORUS</i> Förster, 1869</p><p style="margin-left: 40px;"><i>OTACUSTES</i> Förster, 1869</p><p style="margin-left: 40px;"><i>XENOBRACHYS</i> Förster, 1869</p>									Some distribution data from Townes (1983) and Horstmann (1992a).
300986	Animalia		Arthropoda			Insecta			Hymenoptera			Ichneumonoidea	Ichneumonidae	CRYPTINAE	PHYGADEUONTINI		Dichrogaster		aestivalis				(Gravenhorst, 1829)	<p style="margin-left: 40px;"><i>Hemiteles aestivalis</i> Gravenhorst, 1829</p><p style="margin-left: 40px;"><i>ruficollis</i> (Gravenhorst, 1829, <i>Hemiteles</i>)</p><p style="margin-left: 40px;"><i>geniculata</i> (Thomson, 1884, <i>Hemiteles</i>)</p>							England, Scotland, Wales, Ireland
300987	Animalia		Arthropoda			Insecta			Hymenoptera			Ichneumonoidea	Ichneumonidae	CRYPTINAE	PHYGADEUONTINI		Dichrogaster		bischoffi				(Schmiedeknecht, 1905)	<p style="margin-left: 40px;"><i>Phygadeuon bischoffi</i> Schmiedeknecht, 1905</p><p style="margin-left: 40px;"><i>rufovaria</i> (Schmiedeknecht, 1905, <i>Phygadeuon</i>)</p>							England		added by Schwarz &amp; Shaw (2000)
300988	Animalia		Arthropoda			Insecta			Hymenoptera			Ichneumonoidea	Ichneumonidae	CRYPTINAE	PHYGADEUONTINI		Dichrogaster		genalis				(Habermehl, 1925)	<p style="margin-left: 40px;"><i>Phygadeuon genalis</i> Habermehl, 1925</p><p style="margin-left: 40px;"><i>varsoviensis</i> (Sawoniewicz, 1978, <i>Ethelurgus</i>)</p>							England, Scotland, Ireland		added by Townes (1983)
300989	Animalia		Arthropoda			Insecta			Hymenoptera			Ichneumonoidea	Ichneumonidae	CRYPTINAE	PHYGADEUONTINI		Dichrogaster		heteropus				(Thomson, 1896)	<p style="margin-left: 40px;"><i>Phygadeuon heteropus</i> Thomson, 1896</p><p style="margin-left: 40px;"><i>rufithorax</i> (Schmiedeknecht, 1932, <i>Phygadeuon</i>)</p>							England, Scotland		added by Horstmann (1992a)
300990	Animalia		Arthropoda			Insecta			Hymenoptera			Ichneumonoidea	Ichneumonidae	CRYPTINAE	PHYGADEUONTINI		Dichrogaster		liostylus				(Thomson, 1885)	<p style="margin-left: 40px;"><i>Hemiteles liostylus</i> Thomson, 1885</p><p style="margin-left: 40px;"><i>schaffneri</i> (Schmiedeknecht, 1897, <i>Hemiteles</i>)</p>							England, Scotland, Ireland
300991	Animalia		Arthropoda			Insecta			Hymenoptera			Ichneumonoidea	Ichneumonidae	CRYPTINAE	PHYGADEUONTINI		Dichrogaster		longicaudata				(Thomson, 1884)	<p style="margin-left: 40px;"><i>Hemiteles longicaudatus</i> Thomson, 1884</p><p style="margin-left: 40px;"><i>diatropus</i> Townes, 1983</p>							England, Scotland		NMS, det. Schwarz, added here
300992	Animalia		Arthropoda			Insecta			Hymenoptera			Ichneumonoidea	Ichneumonidae	CRYPTINAE	PHYGADEUONTINI		Dichrogaster		mandibularis				Horstmann, 1973								England		added by Horstmann (1992a)
300993	Animalia		Arthropoda			Insecta			Hymenoptera			Ichneumonoidea	Ichneumonidae	CRYPTINAE	PHYGADEUONTINI		Dichrogaster		modesta				(Gravenhorst, 1829)	<p style="margin-left: 40px;"><i>Hemiteles modestus</i> Gravenhorst, 1829</p><p style="margin-left: 40px;"><i>brunnea</i> (Kiss, 1924, <i>Herpestomus</i>)</p>							England, Scotland, Wales		added by Townes (1983)
300994	Animalia		Arthropoda			Insecta			Hymenoptera			Ichneumonoidea	Ichneumonidae	CRYPTINAE	PHYGADEUONTINI		Dichrogaster		perlae				(Doumerc, 1855)	<p style="margin-left: 40px;"><i>Microgaster perlae</i> Doumerc, 1855</p>							England		added by Townes (1983)
300995	Animalia		Arthropoda			Insecta			Hymenoptera			Ichneumonoidea	Ichneumonidae	CRYPTINAE	PHYGADEUONTINI		Dichrogaster		schimitscheki				(Fahringer, 1935)	<p style="margin-left: 40px;"><i>Phygadeuon schimitscheki</i> Fahringer, 1935</p><p style="margin-left: 40px;"><i>nigrithorax</i> Horstmann, 1976</p>							England		added by Townes (1983)
300996	Animalia		Arthropoda			Insecta			Hymenoptera			Ichneumonoidea	Ichneumonidae	CRYPTINAE	PHYGADEUONTINI		Encrateola						Strand, 1917	<p style="margin-left: 40px;"><i>ENCRATES</i> Förster, 1869</p>
300997	Animalia		Arthropoda			Insecta			Hymenoptera			Ichneumonoidea	Ichneumonidae	CRYPTINAE	PHYGADEUONTINI		Encrateola		glabra				Horstmann, 1998								England		added by Schwarz &amp; Shaw (2000)
300998	Animalia		Arthropoda			Insecta			Hymenoptera			Ichneumonoidea	Ichneumonidae	CRYPTINAE	PHYGADEUONTINI		Encrateola		laevigata				(Ratzeburg, 1848)	<p style="margin-left: 40px;"><i>Hemiteles laevigatus</i> Ratzeburg, 1848</p><p style="margin-left: 40px;"><i>furcata</i> (Taschenberg, 1865, <i>Hemiteles</i>)</p><p style="margin-left: 40px;"><i>subimpressa</i> (Brischke, 1892, <i>Hemiteles</i>)</p>							England, Scotland, Wales, Ireland, Isle of Man		Listed as a doubtfully placed species of Hemiteles by Fitton (1978).
300999	Animalia		Arthropoda			Insecta			Hymenoptera			Ichneumonoidea	Ichneumonidae	CRYPTINAE	PHYGADEUONTINI		Endasys						Förster, 1869	<p style="margin-left: 40px;"><i>BACHIA</i> Förster, 1869</p><p style="margin-left: 40px;"><i>SCINACOPUS</i> Förster, 1869</p><p style="margin-left: 40px;"><i>STYLOCRYPTUS</i> Thomson, 1873</p><p style="margin-left: 40px;"><i>BACHIANA</i> Strand, 1929</p>									Distribution data from Sawoniewicz &amp; Luhman (1992), supplemented by material in NHM and NMS. Several species were listed under Glyphicnemis by Fitton (1978).
301000	Animalia		Arthropoda			Insecta			Hymenoptera			Ichneumonoidea	Ichneumonidae	CRYPTINAE	PHYGADEUONTINI		Endasys		alutaceus				(Habermehl, 1912)	<p style="margin-left: 40px;"><i>Stylocryptus alutaceus</i> Habermehl, 1912</p><p style="margin-left: 40px;"><i>nigriventris</i> (Aerts, 1953, <i>Stylocryptus</i>)</p>							England		NHM, det. Sawoniewicz &amp; Luhman, added here
301001	Animalia		Arthropoda			Insecta			Hymenoptera			Ichneumonoidea	Ichneumonidae	CRYPTINAE	PHYGADEUONTINI		Endasys		analis				(Thomson, 1883)	<p style="margin-left: 40px;"><i>Stylocryptus analis</i> Thomson, 1883</p>							England		NHM, det. Sawoniewicz &amp; Luhman, added here
301002	Animalia		Arthropoda			Insecta			Hymenoptera			Ichneumonoidea	Ichneumonidae	CRYPTINAE	PHYGADEUONTINI		Endasys		anglianus				Sawoniewicz &amp; Luhman, 1992								England, Scotland, Wales		added by Sawoniewicz &amp; Luhman (1992)
301003	Animalia		Arthropoda			Insecta			Hymenoptera			Ichneumonoidea	Ichneumonidae	CRYPTINAE	PHYGADEUONTINI		Endasys		brevis				(Gravenhorst, 1829)	<p style="margin-left: 40px;"><i>Phygadeuon brevis</i> Gravenhorst, 1829</p>							England, Wales		added by Sawoniewicz &amp; Luhman (1992)
301004	Animalia		Arthropoda			Insecta			Hymenoptera			Ichneumonoidea	Ichneumonidae	CRYPTINAE	PHYGADEUONTINI		Endasys		brunnulus				Sawoniewicz &amp; Luhman, 1992								England		added by Sawoniewicz &amp; Luhman (1992)
301005	Animalia		Arthropoda			Insecta			Hymenoptera			Ichneumonoidea	Ichneumonidae	CRYPTINAE	PHYGADEUONTINI		Endasys		erythrogaster				(Gravenhorst, 1829)	<p style="margin-left: 40px;"><i>Phygadeuon erythrogaster</i> Gravenhorst, 1829</p><p style="margin-left: 40px;"><i>nigricoxis</i> (Habermehl, 1912, <i>Stylocryptus</i>)</p>
301006	Animalia		Arthropoda			Insecta			Hymenoptera			Ichneumonoidea	Ichneumonidae	CRYPTINAE	PHYGADEUONTINI		Endasys		minutulus				(Thomson, 1883)	<p style="margin-left: 40px;"><i>Stylocryptus minutulus</i> Thomson, 1883</p><p style="margin-left: 40px;"><i>nigripes</i> (Strobl, 1904, <i>Stylocryptus</i>)</p><p style="margin-left: 40px;"><i>fusciventris</i> (Habermehl, 1916, <i>Stylocryptus</i>)</p>							England, Wales, Ireland		added by Sawoniewicz &amp; Luhman (1992)
301007	Animalia		Arthropoda			Insecta			Hymenoptera			Ichneumonoidea	Ichneumonidae	CRYPTINAE	PHYGADEUONTINI		Endasys		parviventris				(Gravenhorst, 1829)	<p style="margin-left: 40px;"><i>Phygadeuon parviventris</i> Gravenhorst, 1829</p><p style="margin-left: 40px;"><i>pictipes</i> (Rudow, 1886, <i>Phygadeuon</i>)</p><p style="margin-left: 40px;"><i>tyrolensis</i> (Schmiedeknecht, 1905, <i>Stylocryptus</i>)</p>							England
301008	Animalia		Arthropoda			Insecta			Hymenoptera			Ichneumonoidea	Ichneumonidae	CRYPTINAE	PHYGADEUONTINI		Endasys		petiolus				Sawoniewicz &amp; Luhman, 1992								England		added by Sawoniewicz &amp; Luhman (1992)
301009	Animalia		Arthropoda			Insecta			Hymenoptera			Ichneumonoidea	Ichneumonidae	CRYPTINAE	PHYGADEUONTINI		Endasys		plagiator				(Gravenhorst, 1829)	<p style="margin-left: 40px;"><i>Phygadeuon plagiator</i> Gravenhorst, 1829</p><p style="margin-left: 40px;"><i>braunsi</i> (Lange, 1911, <i>Acanthocryptus</i>)</p><p style="margin-left: 40px;"><i>laetus</i> (Habermehl, 1929, <i>Stylocryptus</i>)</p>							England, Scotland, Isle of Man		added by Sawoniewicz &amp; Luhman (1992)
301010	Animalia		Arthropoda			Insecta			Hymenoptera			Ichneumonoidea	Ichneumonidae	CRYPTINAE	PHYGADEUONTINI		Endasys		proteuryopsis				Sawoniewicz &amp; Luhman, 1992								England		added by Sawoniewicz &amp; Luhman (1992)
301011	Animalia		Arthropoda			Insecta			Hymenoptera			Ichneumonoidea	Ichneumonidae	CRYPTINAE	PHYGADEUONTINI		Endasys		rusticus				(Habermehl, 1912)	<p style="margin-left: 40px;"><i>Stylocryptus rusticus</i> Habermehl, 1912</p>							England
301012	Animalia		Arthropoda			Insecta			Hymenoptera			Ichneumonoidea	Ichneumonidae	CRYPTINAE	PHYGADEUONTINI		Endasys		senilis				(Gmelin, 1790)	<p style="margin-left: 40px;"><i>Ichneumon senilis</i> Gmelin, 1790</p>							England
301013	Animalia		Arthropoda			Insecta			Hymenoptera			Ichneumonoidea	Ichneumonidae	CRYPTINAE	PHYGADEUONTINI		Endasys		striatus				(Kiss, 1924)	<p style="margin-left: 40px;"><i>Acanthocryptus striatus</i> Kiss, 1924</p>							England		added by Sawoniewicz &amp; Luhman (1992)
301014	Animalia		Arthropoda			Insecta			Hymenoptera			Ichneumonoidea	Ichneumonidae	CRYPTINAE	PHYGADEUONTINI		Endasys		talitzkii				(Telenga, 1961)	<p style="margin-left: 40px;"><i>Phygadaeuon talitzkii</i> Telenga, 1961</p>							England		NHM, det. Sawoniewicz &amp; Luhman, added here
301015	Animalia		Arthropoda			Insecta			Hymenoptera			Ichneumonoidea	Ichneumonidae	CRYPTINAE	PHYGADEUONTINI		Endasys		testaceipes				(Brischke, 1881)	<p style="margin-left: 40px;"><i>Phygadeuon testaceipes</i> Brischke, 1881</p><p style="margin-left: 40px;"><i>coxalis</i> (Schmiedeknecht, 1905, <i>Stylocryptus</i>)</p>							England		added by Sawoniewicz &amp; Luhman (1992)
301016	Animalia		Arthropoda			Insecta			Hymenoptera			Ichneumonoidea	Ichneumonidae	CRYPTINAE	PHYGADEUONTINI		Endasys		thunbergi				Sawoniewicz &amp; Luhman, 1992	<p style="margin-left: 40px;"><i>rubricator</i> (Thunberg, 1824, <i>Ichneumon</i>)</p>							England
301017	Animalia		Arthropoda			Insecta			Hymenoptera			Ichneumonoidea	Ichneumonidae	CRYPTINAE	PHYGADEUONTINI		Endasys		transverseareolatus				(Strobl, 1901)	<p style="margin-left: 40px;"><i>Stylocryptus transverseareolatus</i> Strobl, 1901</p>
301018	Animalia		Arthropoda			Insecta			Hymenoptera			Ichneumonoidea	Ichneumonidae	CRYPTINAE	PHYGADEUONTINI		Endasys		triannulatus				Sawoniewicz &amp; Luhman, 1992								England		added by Sawoniewicz &amp; Luhman (1992)
301019	Animalia		Arthropoda			Insecta			Hymenoptera			Ichneumonoidea	Ichneumonidae	CRYPTINAE	PHYGADEUONTINI		Endasys		varipes				(Gravenhorst, 1829)	<p style="margin-left: 40px;"><i>Phygadeuon varipes</i> Gravenhorst, 1829</p>							England, Isle of Man
301020	Animalia		Arthropoda			Insecta			Hymenoptera			Ichneumonoidea	Ichneumonidae	CRYPTINAE	PHYGADEUONTINI		Ethelurgus						Förster, 1869	<p style="margin-left: 40px;"><i>NUNECHES</i> Förster, 1869</p><p style="margin-left: 40px;"><i>TOLMERUS</i> Förster, 1869</p><p style="margin-left: 40px;"><i>PLATYCRYPTUS</i> Kriechbaumer, 1893</p>									Some distribution and synonymic data from Horstmann (2000a).
301021	Animalia		Arthropoda			Insecta			Hymenoptera			Ichneumonoidea	Ichneumonidae	CRYPTINAE	PHYGADEUONTINI		Ethelurgus		sodalis				(Taschenberg, 1865)	<p style="margin-left: 40px;"><i>Phygadeuon sodalis</i> Taschenberg, 1865</p><p style="margin-left: 40px;"><i>pseudovulnerator</i> (Strobl, 1901, <i>Phygadeuon</i>)</p><p style="margin-left: 40px;"><i>pici</i> (Berthoumieu, 1908, <i>Platylabus</i>)</p><p style="margin-left: 40px;"><i>flavocinctus</i> (Habermehl, 1909, <i>Phygadeuon</i>)</p><p style="margin-left: 40px;"><i>inermis</i> (Habermehl, …							England, Scotland, Wales, Ireland, Isle of Man
301022	Animalia		Arthropoda			Insecta			Hymenoptera			Ichneumonoidea	Ichneumonidae	CRYPTINAE	PHYGADEUONTINI		Ethelurgus		vulnerator				(Gravenhorst, 1829)	<p style="margin-left: 40px;"><i>Phygadeuon vulnerator</i> Gravenhorst, 1829</p>							England, Scotland		Townes (1983) recorded vulnerator from Ireland but his interpretation of the species also included sodalis (Horstmann 2000a); I have seen an Irish specimen of sodalis coll. A. Anderson.
301023	Animalia		Arthropoda			Insecta			Hymenoptera			Ichneumonoidea	Ichneumonidae	CRYPTINAE	PHYGADEUONTINI		Eudelus						Förster, 1869	<p style="margin-left: 40px;"><i>CALLIPHRURUS</i> Förster, 1869</p><p style="margin-left: 40px;"><i>IDEMUM</i> Förster, 1869</p>
301024	Animalia		Arthropoda			Insecta			Hymenoptera			Ichneumonoidea	Ichneumonidae	CRYPTINAE	PHYGADEUONTINI		Eudelus		pallicarpus				(Thomson, 1884)	<p style="margin-left: 40px;"><i>Hemiteles pallicarpus</i> Thomson, 1884</p><p style="margin-left: 40px;"><i>pallidicarpus</i> (Dalla Torre, 1902, <i>Hemiteles</i>)</p><p style="margin-left: 40px;"><i>crassiformis</i> (Viereck, 1917, <i>Hemiteles</i>)</p>							England		Raised from synonymy with simillimus by Schwarz &amp; Shaw (2000).
301025	Animalia		Arthropoda			Insecta			Hymenoptera			Ichneumonoidea	Ichneumonidae	CRYPTINAE	PHYGADEUONTINI		Eudelus		scabriculus				(Thomson, 1884)	<p style="margin-left: 40px;"><i>Hemiteles scabriculus</i> Thomson, 1884</p>							England		Raised from synonymy with simillimus by Schwarz &amp; Shaw (2000).
301026	Animalia		Arthropoda			Insecta			Hymenoptera			Ichneumonoidea	Ichneumonidae	CRYPTINAE	PHYGADEUONTINI		Eudelus		simillimus				(Taschenberg, 1865)	<p style="margin-left: 40px;"><i>Hemiteles simillimus</i> Taschenberg, 1865</p><p style="margin-left: 40px;"><i>?sericeus</i> (Rudow, 1886, <i>Hemiteles</i>)</p><p style="margin-left: 40px;"><i>?albidus</i> (Pfankuch, 1925, <i>Hemiteles</i>)</p><p style="margin-left: 40px;"><i>?meridionator</i> (Aubert, 1960, <i>Astomaspis</i>)</p>							England, Scotland, Ireland		Listed as a doubtfully placed species of Hemiteles by Fitton (1978). Eudelus nigricoxis (Kiss, 1924, Hemiteles) was treated as a valid species by Horstmann (2009b).
301027	Animalia		Arthropoda			Insecta			Hymenoptera			Ichneumonoidea	Ichneumonidae	CRYPTINAE	PHYGADEUONTINI		Eudelus		mediovittatus				(Schmiedeknecht, 1897)	<p style="margin-left: 40px;"><i>Hemiteles mediovittatus</i> Schmiedeknecht, 1897</p>							England		Listed as Encrateola mediovittatus by Fitton (1978), it was transferred to Acrolyta by Horstmann (1983) but left as possibly belonging to Eudelus but probably to a new genus by Schwarz &amp; Shaw (2000); although its generic position is in doubt its status as a British species is not. Recent specimens from Worcestershire (coll. J. Rush, specimens in NHM and Schwarz coll.) have been identified by …
301028	Animalia		Arthropoda			Insecta			Hymenoptera			Ichneumonoidea	Ichneumonidae	CRYPTINAE	PHYGADEUONTINI		Fianoniella						Horstmann, 1992
301029	Animalia		Arthropoda			Insecta			Hymenoptera			Ichneumonoidea	Ichneumonidae	CRYPTINAE	PHYGADEUONTINI		Fianoniella		punctiscutum				(Horstmann, 1990)	<p style="margin-left: 40px;"><i>Odontoneura punctiscutum</i> Horstmann, 1990</p>							England		added by Horstmann (1990b)
301030	Animalia		Arthropoda			Insecta			Hymenoptera			Ichneumonoidea	Ichneumonidae	CRYPTINAE	PHYGADEUONTINI		Gelis						Thunberg, 1827	<p style="margin-left: 40px;"><i>PEZOMACHUS</i> Gravenhorst, 1829</p><p style="margin-left: 40px;"><i>PEZOLOCHUS</i> Förster, 1850</p><p style="margin-left: 40px;"><i>CATALYTUS</i> Förster, 1851</p><p style="margin-left: 40px;"><i>HEMIMACHUS</i> Ratzeburg, 1852</p><p style="margin-left: 40px;"><i>ALEGINA</i> Förster, 1869</p><p style="margin-left: 40px;"><i>ASCHISTUS</i> Förster, 1869</p><p style…									species of Gelis excluded from the British list by Schwarz &amp; Shaw (1999) [alpivagus (Strobl, 1901, Hemiteles) misident.] [stevenii (Gravenhorst, 1829, Pezomachus) misident.] [taschenbergii (Schmiedeknecht, 1897, Hemiteles) misident.] Listed as a doubtfully placed species of Hemiteles by Fitton (1978).
301031	Animalia		Arthropoda			Insecta			Hymenoptera			Ichneumonoidea	Ichneumonidae	CRYPTINAE	PHYGADEUONTINI		Gelis		acarorum				(Linnaeus, 1758)	<p style="margin-left: 40px;"><i>Ichneumon acarorum</i> Linnaeus, 1758</p><p style="margin-left: 40px;"><i>nigricornis</i> (Retzius, 1783, <i>Ichneumon</i>)</p><p style="margin-left: 40px;"><i>audax</i> (Förster, 1850, <i>Pezomachus</i>)</p><p style="margin-left: 40px;"><i>cautus</i> (Förster, 1850, <i>Pezomachus</i>)</p><p style="margin-left: 40px;"><i>circumcinctus</i> (Förster, 1850, <i>Pezoma…
301032	Animalia		Arthropoda			Insecta			Hymenoptera			Ichneumonoidea	Ichneumonidae	CRYPTINAE	PHYGADEUONTINI		Gelis		agilis				(Fabricius, 1775)	<p style="margin-left: 40px;"><i>Ichneumon agilis</i> Fabricius, 1775</p><p style="margin-left: 40px;"><i>cursor</i> (Schrank, 1780, <i>Ichneumon</i>)</p><p style="margin-left: 40px;"><i>fuscicornis</i> (Retzius, 1783, <i>Ichneumon</i>)</p><p style="margin-left: 40px;"><i>ruficornis</i> (Retzius, 1783, <i>Ichneumon</i>)</p><p style="margin-left: 40px;"><i>apterus</i> (Geoffroy, 1785, <i>Ichneumon…							England, Scotland, Wales, Isle of Man
301033	Animalia		Arthropoda			Insecta			Hymenoptera			Ichneumonoidea	Ichneumonidae	CRYPTINAE	PHYGADEUONTINI		Gelis		albicinctoides				Schwarz, 1998								England		added by Horstmann (1990b)
301034	Animalia		Arthropoda			Insecta			Hymenoptera			Ichneumonoidea	Ichneumonidae	CRYPTINAE	PHYGADEUONTINI		Gelis		albipalpus				(Thomson, 1884)	<p style="margin-left: 40px;"><i>Hemiteles albipalpus</i> Thomson, 1884</p><p style="margin-left: 40px;"><i>austriacus</i> (Fahringer, 1937, <i>Hemiteles</i>)</p>							England, Scotland, Ireland
301035	Animalia		Arthropoda			Insecta			Hymenoptera			Ichneumonoidea	Ichneumonidae	CRYPTINAE	PHYGADEUONTINI		Gelis		albopilosus				Schwarz, 2002								England		added by Schwarz (2002)
301036	Animalia		Arthropoda			Insecta			Hymenoptera			Ichneumonoidea	Ichneumonidae	CRYPTINAE	PHYGADEUONTINI		Gelis		anthracinus				(Förster, 1850)	<p style="margin-left: 40px;"><i>Pezomachus anthracinus</i> Förster, 1850</p><p style="margin-left: 40px;"><i>linearis</i> (Förster, 1851, <i>Pezomachus</i>)</p><p style="margin-left: 40px;"><i>gonatopinus</i> (Thomson, 1884, <i>Pezomachus</i>)</p>							England, Scotland, Ireland
301037	Animalia		Arthropoda			Insecta			Hymenoptera			Ichneumonoidea	Ichneumonidae	CRYPTINAE	PHYGADEUONTINI		Gelis		areator				(Panzer, 1804)	<p style="margin-left: 40px;"><i>Icneumon areator</i> Panzer, 1804</p><p style="margin-left: 40px;"><i>aberrans</i> (Gravenhorst, 1829, <i>Pezomachus</i>)</p><p style="margin-left: 40px;"><i>orbiculatus</i> (Gravenhorst, 1829, <i>Hemiteles</i>)</p><p style="margin-left: 40px;"><i>pulchellus</i> (Gravenhorst, 1829, <i>Hemiteles</i>)</p><p style="margin-left: 40px;"><i>coelebs</i> (Ratzeburg, 1852,…							England, Scotland, Wales, Ireland
301038	Animalia		Arthropoda			Insecta			Hymenoptera			Ichneumonoidea	Ichneumonidae	CRYPTINAE	PHYGADEUONTINI		Gelis		avarus				(Förster, 1850)	<p style="margin-left: 40px;"><i>Pezomachus avarus</i> Förster, 1850</p>							England, Scotland, Wales, Ireland		added by Schwarz &amp; Shaw (1999)
301039	Animalia		Arthropoda			Insecta			Hymenoptera			Ichneumonoidea	Ichneumonidae	CRYPTINAE	PHYGADEUONTINI		Gelis		balteatus				(Thomson, 1885)	<p style="margin-left: 40px;"><i>Hemiteles balteatus</i> Thomson, 1885</p><p style="margin-left: 40px;"><i>brevistylus</i> (Hellén, 1967, <i>Charitopes</i>)</p>							England, Wales		Listed by Fitton (1978) as a doubtfully placed species of Hemiteles.
301040	Animalia		Arthropoda			Insecta			Hymenoptera			Ichneumonoidea	Ichneumonidae	CRYPTINAE	PHYGADEUONTINI		Gelis		bicolor				(Villers, 1789)	<p style="margin-left: 40px;"><i>Ichneumon bicolor</i> Villers, 1789</p><p style="margin-left: 40px;"><i>alacer</i> (Förster, 1850, <i>Pezomachus</i>)</p><p style="margin-left: 40px;"><i>brachyurus</i> (Förster, 1850, <i>Pezomachus</i>)</p><p style="margin-left: 40px;"><i>distinctus</i> (Förster, 1850, <i>Pezomachus</i>)</p><p style="margin-left: 40px;"><i>furtivus</i> (Förster, 1850, <i>Pezomach…							England, Scotland
301041	Animalia		Arthropoda			Insecta			Hymenoptera			Ichneumonoidea	Ichneumonidae	CRYPTINAE	PHYGADEUONTINI		Gelis		brevis				(Bridgman, 1883)	<p style="margin-left: 40px;"><i>Pezomachus brevis</i> Bridgman, 1883</p>
301042	Animalia		Arthropoda			Insecta			Hymenoptera			Ichneumonoidea	Ichneumonidae	CRYPTINAE	PHYGADEUONTINI		Gelis		caudatulus				Horstmann, 1997	<p style="margin-left: 40px;"><i>caudator</i> Horstmann, 1986</p>							Scotland		added by Schwarz &amp; Shaw (1999)
301043	Animalia		Arthropoda			Insecta			Hymenoptera			Ichneumonoidea	Ichneumonidae	CRYPTINAE	PHYGADEUONTINI		Gelis		cayennator				(Thunberg, 1824)	<p style="margin-left: 40px;"><i>Ichneumon cayennator</i> Thunberg, 1824</p><p style="margin-left: 40px;"><i>brassicae</i> Horstmann, 1986</p><p style="margin-left: 40px;"><i>sulcatus</i> (Blunck, 1951, <i>Hemiteles</i>)</p>							England, Scotland, Wales		added by Schwarz &amp; Shaw (1999)
301044	Animalia		Arthropoda			Insecta			Hymenoptera			Ichneumonoidea	Ichneumonidae	CRYPTINAE	PHYGADEUONTINI		Gelis		cinctus				(Linnaeus, 1758)	<p style="margin-left: 40px;"><i>Ichneumon cinctus</i> Linnaeus, 1758</p><p style="margin-left: 40px;"><i>cinctor</i> (Thunberg, 1824, <i>Ichneumon</i>)</p><p style="margin-left: 40px;"><i>bicolorinus</i> (Gravenhorst, 1829, <i>Hemiteles</i>)</p>							England, Scotland
301045	Animalia		Arthropoda			Insecta			Hymenoptera			Ichneumonoidea	Ichneumonidae	CRYPTINAE	PHYGADEUONTINI		Gelis		cursitans				(Fabricius, 1775)	<p style="margin-left: 40px;"><i>Ichneumon cursitans</i> Fabricius, 1775</p><p style="margin-left: 40px;"><i>tuberculatus</i> (Hartig, 1838, <i>Pezomachus</i>)</p><p style="margin-left: 40px;"><i>decipiens</i> (Förster, 1850, <i>Pezomachus</i>)</p><p style="margin-left: 40px;"><i>peregrinator</i> (Förster, 1850, <i>Pezomachus</i>)</p><p style="margin-left: 40px;"><i>alpinus</i> (Rudow, 1917, <i>P…
301046	Animalia		Arthropoda			Insecta			Hymenoptera			Ichneumonoidea	Ichneumonidae	CRYPTINAE	PHYGADEUONTINI		Gelis		curvicauda				Horstmann, 1993								England		added by Schwarz (1994)
301047	Animalia		Arthropoda			Insecta			Hymenoptera			Ichneumonoidea	Ichneumonidae	CRYPTINAE	PHYGADEUONTINI		Gelis		discedens				(Förster, 1850)	<p style="margin-left: 40px;"><i>Pezomachus discedens</i> Förster, 1850</p><p style="margin-left: 40px;"><i>vagans</i> misident.</p><p style="margin-left: 40px;"><i>calvus</i> (Förster, 1850, <i>Pezomachus</i>)</p><p style="margin-left: 40px;"><i>quaesitorius</i> (Förster, 1850, <i>Pezomachus</i>)</p><p style="margin-left: 40px;"><i>collaris</i> (Rudow, 1917, <i>Pezomachus</i>)</p><p style="margi…							England, Scotland, Wales
301048	Animalia		Arthropoda			Insecta			Hymenoptera			Ichneumonoidea	Ichneumonidae	CRYPTINAE	PHYGADEUONTINI		Gelis		divaricatus				Horstmann, 1993								England, Wales		added by Horstmann (1993a)
301049	Animalia		Arthropoda			Insecta			Hymenoptera			Ichneumonoidea	Ichneumonidae	CRYPTINAE	PHYGADEUONTINI		Gelis		edentatus				(Förster, 1850)	<p style="margin-left: 40px;"><i>Pezomachus edentatus</i> Förster, 1850</p><p style="margin-left: 40px;"><i>imbellis</i> (Förster, 1850, <i>Pezomachus</i>)</p><p style="margin-left: 40px;"><i>modestus</i> (Förster, 1850, <i>Pezomachus</i>)</p><p style="margin-left: 40px;"><i>vagantiformis</i> (Bridgman, 1886, <i>Pezomachus</i>)</p><p style="margin-left: 40px;"><i>dusmeti</i> Ceballos, 1925</p>							England
301050	Animalia		Arthropoda			Insecta			Hymenoptera			Ichneumonoidea	Ichneumonidae	CRYPTINAE	PHYGADEUONTINI		Gelis		exareolatus				(Förster, 1850)	<p style="margin-left: 40px;"><i>Pezomachus exareolatus</i> Förster, 1850</p><p style="margin-left: 40px;"><i>nigritus</i> (Förster, 1850, <i>Pezomachus</i>)</p><p style="margin-left: 40px;"><i>simulans</i> (Förster, 1850, <i>Pezomachus</i>)</p><p style="margin-left: 40px;"><i>micromelas</i> (Kriechbaumer, 1894, <i>Phygadeuon</i>)</p><p style="margin-left: 40px;"><i>lapponicus</i> Hellén, 1970</p>							England, Scotland
301051	Animalia		Arthropoda			Insecta			Hymenoptera			Ichneumonoidea	Ichneumonidae	CRYPTINAE	PHYGADEUONTINI		Gelis		falcatus				Horstmann, 1986								Scotland		added by Horstmann (1986)
301052	Animalia		Arthropoda			Insecta			Hymenoptera			Ichneumonoidea	Ichneumonidae	CRYPTINAE	PHYGADEUONTINI		Gelis		fallax				(Förster, 1850)	<p style="margin-left: 40px;"><i>Pezomachus fallax</i> Förster, 1850</p><p style="margin-left: 40px;"><i>nigricornis</i> (Förster, 1850, <i>Pezomachus</i>)</p><p style="margin-left: 40px;"><i>iglesiasi</i> Ceballos, 1925</p>							Wales, Ireland
301053	Animalia		Arthropoda			Insecta			Hymenoptera			Ichneumonoidea	Ichneumonidae	CRYPTINAE	PHYGADEUONTINI		Gelis		fasciitinctus				(Dalla Torre, 1901)	<p style="margin-left: 40px;"><i>Hemiteles fasciitinctus</i> Dalla Torre, 1901</p><p style="margin-left: 40px;"><i>fasciipennis</i> (Brischke, 1881, <i>Hemiteles</i>)</p>							England, Scotland		added by Schwarz &amp; Shaw (1999)
301054	Animalia		Arthropoda			Insecta			Hymenoptera			Ichneumonoidea	Ichneumonidae	CRYPTINAE	PHYGADEUONTINI		Gelis		festinans				(Fabricius, 1798)	<p style="margin-left: 40px;"><i>Ichneumon festinans</i> Fabricius, 1798</p><p style="margin-left: 40px;"><i>nanus</i> (Förster, 1850, <i>Pezomachus</i>)</p><p style="margin-left: 40px;"><i>pothumus</i> (Förster, 1850, <i>Pezomachus</i>)</p><p style="margin-left: 40px;"><i>pumilus</i> (Förster, 1850, <i>Pezomachus</i>)</p><p style="margin-left: 40px;"><i>tener</i> (Förster, 1850, <i>Pezomachus</i…							England, Scotland, Wales, Ireland
301055	Animalia		Arthropoda			Insecta			Hymenoptera			Ichneumonoidea	Ichneumonidae	CRYPTINAE	PHYGADEUONTINI		Gelis		formicarius				(Linnaeus, 1758)	<p style="margin-left: 40px;"><i>Mutilla formicaria</i> Linnaeus, 1758</p><p style="margin-left: 40px;"><i>ratzeburgi</i> (Förster, 1850, <i>Pezomachus</i>)</p><p style="margin-left: 40px;"><i>confusus</i> (Bridgman, 1883, <i>Hemimachus</i>)</p><p style="margin-left: 40px;"><i>verrucosus</i> (Rudow, 1917, <i>Pezomachus</i>)</p>							England
301056	Animalia		Arthropoda			Insecta			Hymenoptera			Ichneumonoidea	Ichneumonidae	CRYPTINAE	PHYGADEUONTINI		Gelis		forticornis				(Förster, 1850)	<p style="margin-left: 40px;"><i>Pezomachus forticornis</i> Förster, 1850</p><p style="margin-left: 40px;"><i>manevali</i> Seyrig, 1927</p>							England		added by Schwarz (1998)
301057	Animalia		Arthropoda			Insecta			Hymenoptera			Ichneumonoidea	Ichneumonidae	CRYPTINAE	PHYGADEUONTINI		Gelis		fuscicornis				(Retzius, 1783)	<p style="margin-left: 40px;"><i>Ichneumon fuscicornis</i> Retzius, 1783</p><p style="margin-left: 40px;"><i>longulus</i> (Zetterstedt, 1838, <i>Cryptus</i>)</p>							England, Scotland		added by Schwarz &amp; Boriani (1994)
301058	Animalia		Arthropoda			Insecta			Hymenoptera			Ichneumonoidea	Ichneumonidae	CRYPTINAE	PHYGADEUONTINI		Gelis		hortensis				(Christ, 1791)	<p style="margin-left: 40px;"><i>Ichneumon hortensis</i> Christ, 1791</p><p style="margin-left: 40px;"><i>acarorum</i> misident.</p><p style="margin-left: 40px;"><i>callidus</i> (Förster, 1850, <i>Pezomachus</i>)</p><p style="margin-left: 40px;"><i>canaliculatus</i> (Förster, 1850, <i>Pezomachus</i>)</p><p style="margin-left: 40px;"><i>gentilis</i> (Förster, 1850, <i>Pezomachus</i>)</p><p style="…							England, Scotland, Wales, Ireland
301059	Animalia		Arthropoda			Insecta			Hymenoptera			Ichneumonoidea	Ichneumonidae	CRYPTINAE	PHYGADEUONTINI		Gelis		intermedius				(Förster, 1850)	<p style="margin-left: 40px;"><i>Pezomachus intermedius</i> Förster, 1850</p><p style="margin-left: 40px;"><i>furax</i> (Förster, 1850, <i>Pezomachus</i>)</p>							England		reinstated by Schwarz &amp; Shaw (1999)
301060	Animalia		Arthropoda			Insecta			Hymenoptera			Ichneumonoidea	Ichneumonidae	CRYPTINAE	PHYGADEUONTINI		Gelis		kiesenwetteri				(Förster, 1850)	<p style="margin-left: 40px;"><i>Pezomachus kiesenwetteri</i> Förster, 1850</p><p style="margin-left: 40px;"><i>bellicosus</i> (Förster, 1850, <i>Pezomachus</i>)</p><p style="margin-left: 40px;"><i>debeyii</i> (Förster, 1850, <i>Pezomachus</i>)</p><p style="margin-left: 40px;"><i>egregius</i> (Förster, 1850, <i>Pezomachus</i>)</p><p style="margin-left: 40px;"><i>costatus</i> (Bridgmanm, 1886, <i>…							England, Scotland, Ireland
301061	Animalia		Arthropoda			Insecta			Hymenoptera			Ichneumonoidea	Ichneumonidae	CRYPTINAE	PHYGADEUONTINI		Gelis		limbatus				(Gravenhorst, 1829)	<p style="margin-left: 40px;"><i>Hemiteles limbatus</i> Gravenhorst, 1829</p>									Listed by Fitton (1978) as a doubtfully placed species of Hemiteles.
301062	Animalia		Arthropoda			Insecta			Hymenoptera			Ichneumonoidea	Ichneumonidae	CRYPTINAE	PHYGADEUONTINI		Gelis		liparae				(Giraud, 1863)	<p style="margin-left: 40px;"><i>Hemiteles liparae</i> Giraud, 1863</p><p style="margin-left: 40px;"><i>ilicicola</i> (Seyrig, 1927, <i>Hemiteles</i>)</p><p style="margin-left: 40px;"><i>ilicicolator</i> Aubert, 1966</p>							England		added by Horstmann (1986)
301063	Animalia		Arthropoda			Insecta			Hymenoptera			Ichneumonoidea	Ichneumonidae	CRYPTINAE	PHYGADEUONTINI		Gelis		longicauda				(Thomson, 1884)	<p style="margin-left: 40px;"><i>Hemiteles longicauda</i> Thomson, 1884</p>							England, Scotland, Ireland
301064	Animalia		Arthropoda			Insecta			Hymenoptera			Ichneumonoidea	Ichneumonidae	CRYPTINAE	PHYGADEUONTINI		Gelis		lucidulus				(Förster, 1850)	<p style="margin-left: 40px;"><i>Pezomachus lucidulus</i> Förster, 1850</p><p style="margin-left: 40px;"><i>inquilinus</i> (Förster, 1850, <i>Pezomachus</i>)</p><p style="margin-left: 40px;"><i>microstylus</i> (Förster, 1851, <i>Pezomachus</i>)</p>
301065	Animalia		Arthropoda			Insecta			Hymenoptera			Ichneumonoidea	Ichneumonidae	CRYPTINAE	PHYGADEUONTINI		Gelis		mangeri				(Gravenhorst, 1815)	<p style="margin-left: 40px;"><i>Ichneumon mangeri</i> Gravenhorst, 1815</p><p style="margin-left: 40px;"><i>fulveolatus</i> (Gravenhorst, 1829, <i>Pezomachus</i>)</p><p style="margin-left: 40px;"><i>longipennis</i> (Gravenhorst, 1829, <i>Pezomachus</i>)</p><p style="margin-left: 40px;"><i>foersteri</i> (Bridgman, 1882, <i>Aptesis</i>)</p>							England, Wales
301066	Animalia		Arthropoda			Insecta			Hymenoptera			Ichneumonoidea	Ichneumonidae	CRYPTINAE	PHYGADEUONTINI		Gelis		meigenii				(Förster, 1850)	<p style="margin-left: 40px;"><i>Pezomachus meigenii</i> Förster, 1850</p><p style="margin-left: 40px;"><i>denudatus</i> (Förster, 1850, <i>Pezomachus</i>)</p><p style="margin-left: 40px;"><i>geochares</i> (Förster, 1850, <i>Pezomachus</i>)</p><p style="margin-left: 40px;"><i>insolens</i> (Förster, 1850, <i>Pezomachus</i>)</p><p style="margin-left: 40px;"><i>?rufotinctus</i> (Bridgman, 1883, <i>H…							England, Wales, Scotland
301067	Animalia		Arthropoda			Insecta			Hymenoptera			Ichneumonoidea	Ichneumonidae	CRYPTINAE	PHYGADEUONTINI		Gelis		melanocephalus				(Schrank, 1781)	<p style="margin-left: 40px;"><i>Mutilla melanocephala</i> Schrank, 1781</p><p style="margin-left: 40px;"><i>fasciatus</i> (Fabricius, 1793, <i>Ichneumon</i>)</p><p style="margin-left: 40px;"><i>fasciatus</i> (Ratzeburg, 1852, <i>Hemiteles</i>)</p><p style="margin-left: 40px;"><i>hercyniae</i> (Rudow, 1917, <i>Pezomachus</i>)</p>							England, Scotland, Wales, Ireland, Isle of Man
301068	Animalia		Arthropoda			Insecta			Hymenoptera			Ichneumonoidea	Ichneumonidae	CRYPTINAE	PHYGADEUONTINI		Gelis		melanogaster				(Thomson, 1884)	<p style="margin-left: 40px;"><i>Hemiteles melanogaster</i> Thomson, 1884</p>							Wales		Added by Schwarz &amp; Shaw (1999), but it was overlooked that Fitton (1978) had treated this as a species of Charitopes.
301069	Animalia		Arthropoda			Insecta			Hymenoptera			Ichneumonoidea	Ichneumonidae	CRYPTINAE	PHYGADEUONTINI		Gelis		melanophorus				(Förster, 1851)	<p style="margin-left: 40px;"><i>Pezomachus melanophorus</i> Förster, 1851</p><p style="margin-left: 40px;"><i>fuscicornis</i> (Förster, 1850, <i>Pezomachus</i>)</p><p style="margin-left: 40px;"><i>foersteri</i> (Bridgman, 1886, <i>Pezomachus</i>)</p>							England, Scotland, Ireland		added by Schwarz &amp; Shaw (1999)
301070	Animalia		Arthropoda			Insecta			Hymenoptera			Ichneumonoidea	Ichneumonidae	CRYPTINAE	PHYGADEUONTINI		Gelis		micrurus				(Förster, 1850)	<p style="margin-left: 40px;"><i>Pezomachus micrurus</i> Förster, 1850</p><p style="margin-left: 40px;"><i>pardosae</i> (Giard, 1895, <i>Hemiteles</i>)</p>							England, Scotland, Wales, Ireland
301071	Animalia		Arthropoda			Insecta			Hymenoptera			Ichneumonoidea	Ichneumonidae	CRYPTINAE	PHYGADEUONTINI		Gelis		mitis				Schwarz, 1994								England		added by Schwarz (1994)
301072	Animalia		Arthropoda			Insecta			Hymenoptera			Ichneumonoidea	Ichneumonidae	CRYPTINAE	PHYGADEUONTINI		Gelis		mutillatus				(Gmelin, 1790)	<p style="margin-left: 40px;"><i>Ichneumon mutillatus</i> Gmelin, 1790</p><p style="margin-left: 40px;"><i>mutillarius</i> (Fabricius, 1787, <i>Ichneumon</i>)</p><p style="margin-left: 40px;"><i>vagans</i> (Olivier, 1792, <i>Ichneumon</i>)</p><p style="margin-left: 40px;"><i>pedicularius</i> (Fabricius, 1793, <i>Ichneumon</i>)</p>
301073	Animalia		Arthropoda			Insecta			Hymenoptera			Ichneumonoidea	Ichneumonidae	CRYPTINAE	PHYGADEUONTINI		Gelis		nigritulus				(Zetterstedt, 1838)	<p style="margin-left: 40px;"><i>Cryptus nigritulus</i> Zetterstedt, 1838</p><p style="margin-left: 40px;"><i>terebrator</i> (Ratzeburg, 1848, <i>Pezomachus</i>)</p>							England, Scotland
301074	Animalia		Arthropoda			Insecta			Hymenoptera			Ichneumonoidea	Ichneumonidae	CRYPTINAE	PHYGADEUONTINI		Gelis		nitidus				Horstmann, 1986								England		added by Horstmann (1986)
301075	Animalia		Arthropoda			Insecta			Hymenoptera			Ichneumonoidea	Ichneumonidae	CRYPTINAE	PHYGADEUONTINI		Gelis		obscuripes				Horstmann, 1986								England, Scotland, Wales		added by Horstmann (1986)
301076	Animalia		Arthropoda			Insecta			Hymenoptera			Ichneumonoidea	Ichneumonidae	CRYPTINAE	PHYGADEUONTINI		Gelis		papaveris				(Förster, 1856)	<p style="margin-left: 40px;"><i>Pezomachus papaveris</i> Förster, 1856</p><p style="margin-left: 40px;"><i>hieracii</i> (Bridgman, 1883, <i>Pezomachus</i>)</p><p style="margin-left: 40px;"><i>grandiceps</i> (Thomson, 1884, <i>Pezomachus</i>)</p>
301077	Animalia		Arthropoda			Insecta			Hymenoptera			Ichneumonoidea	Ichneumonidae	CRYPTINAE	PHYGADEUONTINI		Gelis		problemator				Aubert, 1989								England, Scotland		added by Schwarz (1994)
301078	Animalia		Arthropoda			Insecta			Hymenoptera			Ichneumonoidea	Ichneumonidae	CRYPTINAE	PHYGADEUONTINI		Gelis		proximus				(Förster, 1850)	<p style="margin-left: 40px;"><i>Pezomachus proximus</i> Förster, 1850</p><p style="margin-left: 40px;"><i>analis</i> (Förster, 1850, <i>Pezomachus</i>)</p><p style="margin-left: 40px;"><i>attentus</i> (Förster, 1850, <i>Pezomachus</i>)</p><p style="margin-left: 40px;"><i>celer</i> (Förster, 1850, <i>Pezomachus</i>)</p><p style="margin-left: 40px;"><i>consociatus</i> (Förster, 1850, <i>Pezomachus…							England, Scotland, Wales, Ireland, Isle of Man
301079	Animalia		Arthropoda			Insecta			Hymenoptera			Ichneumonoidea	Ichneumonidae	CRYPTINAE	PHYGADEUONTINI		Gelis		pulicarius				(Fabricius, 1793)	<p style="margin-left: 40px;"><i>Ichneumon pulicarius</i> Fabricius, 1793</p><p style="margin-left: 40px;"><i>hoffmannseggii</i> (Gravenhorst, 1815, <i>Ichneumon</i>)</p>
301080	Animalia		Arthropoda			Insecta			Hymenoptera			Ichneumonoidea	Ichneumonidae	CRYPTINAE	PHYGADEUONTINI		Gelis		recens				Schwarz, 2002								England		added by Schwarz (2002)
301081	Animalia		Arthropoda			Insecta			Hymenoptera			Ichneumonoidea	Ichneumonidae	CRYPTINAE	PHYGADEUONTINI		Gelis		rufipes				(Förster, 1850)	<p style="margin-left: 40px;"><i>Pezolochus rufipes</i> Förster, 1850</p><p style="margin-left: 40px;"><i>aries</i> (Förster, 1850, <i>Pezomachus</i>)</p><p style="margin-left: 40px;"><i>ecarinatus</i> (Förster, 1850, <i>Pezomachus</i>)</p>							England, Ireland		added by Schwarz &amp; Shaw (1999)
301082	Animalia		Arthropoda			Insecta			Hymenoptera			Ichneumonoidea	Ichneumonidae	CRYPTINAE	PHYGADEUONTINI		Gelis		rufogaster				Thunberg, 1827	<p style="margin-left: 40px;"><i>aemulus</i> (Förster, 1850, <i>Pezomachus</i>)</p><p style="margin-left: 40px;"><i>alienus</i> (Förster, 1850, <i>Pezomachus</i>)</p><p style="margin-left: 40px;"><i>anceps</i> (Förster, 1850, <i>Pezomachus</i>)</p><p style="margin-left: 40px;"><i>astutus</i> (Förster, 1850, <i>Pezomachus</i>)</p><p style="margin-left: 40px;"><i>bicinctus</i> (Förster, 1850, <i>Pe…							England, Scotland, Wales, Ireland
301083	Animalia		Arthropoda			Insecta			Hymenoptera			Ichneumonoidea	Ichneumonidae	CRYPTINAE	PHYGADEUONTINI		Gelis		rugifer				(Thomson, 1884)	<p style="margin-left: 40px;"><i>Hemiteles rugifer</i> Thomson, 1884</p>							England, Scotland, Wales
301084	Animalia		Arthropoda			Insecta			Hymenoptera			Ichneumonoidea	Ichneumonidae	CRYPTINAE	PHYGADEUONTINI		Gelis		seyrigi				Ceballos, 1925								England		added by Schwarz (1998)
301085	Animalia		Arthropoda			Insecta			Hymenoptera			Ichneumonoidea	Ichneumonidae	CRYPTINAE	PHYGADEUONTINI		Gelis		spinula				(Thomson, 1884)	<p style="margin-left: 40px;"><i>Pezomachus spinula</i> Thomson, 1884</p>							England, Scotland, Ireland
301086	Animalia		Arthropoda			Insecta			Hymenoptera			Ichneumonoidea	Ichneumonidae	CRYPTINAE	PHYGADEUONTINI		Gelis		spurius				(Förster, 1850)	<p style="margin-left: 40px;"><i>Pezomachus spurius</i> Förster, 1850</p><p style="margin-left: 40px;"><i>ruficornis</i> misident.</p>							England, Scotland
301087	Animalia		Arthropoda			Insecta			Hymenoptera			Ichneumonoidea	Ichneumonidae	CRYPTINAE	PHYGADEUONTINI		Gelis		terribilis				Schwarz, 2002								England, Scotland		added by Schwarz (2002)
301088	Animalia		Arthropoda			Insecta			Hymenoptera			Ichneumonoidea	Ichneumonidae	CRYPTINAE	PHYGADEUONTINI		Gelis		thomsoni				(Schmiedeknecht, 1933)	<p style="margin-left: 40px;"><i>Hemiteles thomsoni</i> Schmiedeknecht, 1933</p><p style="margin-left: 40px;"><i>dispar</i> (Thomson, 1885, <i>Hemiteles</i>)</p>							England		Listed by Fitton (1978) as a doubtfully placed species of Hemiteles.
301089	Animalia		Arthropoda			Insecta			Hymenoptera			Ichneumonoidea	Ichneumonidae	CRYPTINAE	PHYGADEUONTINI		Gelis		trux				(Förster, 1850)	<p style="margin-left: 40px;"><i>Pezomachus trux</i> Förster, 1850</p><p style="margin-left: 40px;"><i>ruficornis</i> Thunberg, 1827</p><p style="margin-left: 40px;"><i>blandus</i> (Förster, 1850, <i>Pezomachus</i>)</p><p style="margin-left: 40px;"><i>comes</i> (Förster, 1850, <i>Pezomachus</i>)</p><p style="margin-left: 40px;"><i>transfuga</i> (Förster, 1850, <i>Pezomachus</i>)</p>							England, Wales
301090	Animalia		Arthropoda			Insecta			Hymenoptera			Ichneumonoidea	Ichneumonidae	CRYPTINAE	PHYGADEUONTINI		Gelis		viduus				(Förster, 1850)	<p style="margin-left: 40px;"><i>Pezomachus viduus</i> Förster, 1850</p><p style="margin-left: 40px;"><i>congruus</i> (Förster, 1850, <i>Pezomachus</i>)</p><p style="margin-left: 40px;"><i>doliopus</i> (Förster, 1851, <i>Pezomachus</i>)</p><p style="margin-left: 40px;"><i>mandibularis</i> (Thomson, 1884, <i>Pezomachus</i>)</p>							England, Scotland, Wales, Ireland
301091	Animalia		Arthropoda			Insecta			Hymenoptera			Ichneumonoidea	Ichneumonidae	CRYPTINAE	PHYGADEUONTINI		Gelis		vulnerans				(Förster, 1850)	<p style="margin-left: 40px;"><i>Pezomachus vulnerans</i> Förster, 1850</p><p style="margin-left: 40px;"><i>affinis</i> (Magretti, 1884, <i>Pezomachus</i>)</p>
301092	Animalia		Arthropoda			Insecta			Hymenoptera			Ichneumonoidea	Ichneumonidae	CRYPTINAE	PHYGADEUONTINI		Gelis		zeirapherator				(Aubert, 1966)	<p style="margin-left: 40px;"><i>Alegina zeirapherator</i> Aubert, 1966</p>							Scotland		added by Schwarz &amp; Shaw (1999)
301093	Animalia		Arthropoda			Insecta			Hymenoptera			Ichneumonoidea	Ichneumonidae	CRYPTINAE	PHYGADEUONTINI		Glyphicnemis						Förster, 1869	<p style="margin-left: 40px;"><i>GNATHOCRYPTUS</i> Thomson, 1873</p>									Some distribution data from Fitton (1976) and Sawoniewicz (1985).
301094	Animalia		Arthropoda			Insecta			Hymenoptera			Ichneumonoidea	Ichneumonidae	CRYPTINAE	PHYGADEUONTINI		Glyphicnemis		atrata				(Strobl, 1901)	<p style="margin-left: 40px;"><i>Stylocryptus atratus</i> Strobl, 1901</p><p style="margin-left: 40px;"><i>alpina</i> (Strobl, 1901, <i>Stylocryptus</i>)</p><p style="margin-left: 40px;"><i>suffolciensis</i> Morley, 1907</p>							England, Scotland, Wales
301095	Animalia		Arthropoda			Insecta			Hymenoptera			Ichneumonoidea	Ichneumonidae	CRYPTINAE	PHYGADEUONTINI		Glyphicnemis		clypealis				(Thomson, 1883)	<p style="margin-left: 40px;"><i>Stylocryptus clypealis</i> Thomson, 1883</p>							England
301096	Animalia		Arthropoda			Insecta			Hymenoptera			Ichneumonoidea	Ichneumonidae	CRYPTINAE	PHYGADEUONTINI		Glyphicnemis		profligator				(Fabricius, 1775)	<p style="margin-left: 40px;"><i>Ichneumon profligator</i> Fabricius, 1775</p><p style="margin-left: 40px;"><i>abdominalis</i> (Geoffroy, 1785, <i>Ichneumon</i>)</p><p style="margin-left: 40px;"><i>nigricornis</i> (Gmelin, 1790, <i>Ichneumon</i>)</p><p style="margin-left: 40px;"><i>textor</i> (Thunberg, 1824, <i>Ichneumon</i>)</p><p style="margin-left: 40px;"><i>frequentoria</i> (Zetterstedt, 183…							England, Scotland, Wales, Ireland, Isle of Man
301097	Animalia		Arthropoda			Insecta			Hymenoptera			Ichneumonoidea	Ichneumonidae	CRYPTINAE	PHYGADEUONTINI		Glyphicnemis		vagabunda				(Gravenhorst, 1829)	<p style="margin-left: 40px;"><i>Phygadeuon vagabundus</i> Gravenhorst, 1829</p><p style="margin-left: 40px;"><i>podagrica</i> (Gravenhorst, 1829, <i>Phygadeuon</i>)</p><p style="margin-left: 40px;"><i>exannulata</i> (Hedwig, 1956, <i>Stylocryptus</i>)</p>							England
301098	Animalia		Arthropoda			Insecta			Hymenoptera			Ichneumonoidea	Ichneumonidae	CRYPTINAE	PHYGADEUONTINI		Gnotus						Förster, 1869
301099	Animalia		Arthropoda			Insecta			Hymenoptera			Ichneumonoidea	Ichneumonidae	CRYPTINAE	PHYGADEUONTINI		Gnotus		chionops				(Gravenhorst, 1829)	<p style="margin-left: 40px;"><i>Hemiteles chionops</i> Gravenhorst, 1829</p><p style="margin-left: 40px;"><i>scutellator</i> (Lange, 1911, <i>Hemiteles</i>)</p>							England, Scotland
301100	Animalia		Arthropoda			Insecta			Hymenoptera			Ichneumonoidea	Ichneumonidae	CRYPTINAE	PHYGADEUONTINI		Gnotus		macrurus				(Thomson, 1884)	<p style="margin-left: 40px;"><i>Hemiteles macrurus</i> Thomson, 1884</p>							Scotland		Listed as a doubtfully placed species of Hemiteles by Fitton (1978).
301101	Animalia		Arthropoda			Insecta			Hymenoptera			Ichneumonoidea	Ichneumonidae	CRYPTINAE	PHYGADEUONTINI		Gnotus		rugipectus				(Thomson, 1886)	<p style="margin-left: 40px;"><i>Phygadeuon rugipectus</i> Thomson, 1886</p>									Transferred from Phygadeuon by Horstmann (1998a).
301102	Animalia		Arthropoda			Insecta			Hymenoptera			Ichneumonoidea	Ichneumonidae	CRYPTINAE	PHYGADEUONTINI		Gnotus		tenuipes				(Gravenhorst, 1829)	<p style="margin-left: 40px;"><i>Phygadeuon tenuipes</i> Gravenhorst, 1829</p><p style="margin-left: 40px;"><i>tenuicornis</i> (Gravenhorst, 1829, <i>Hemiteles</i>)</p><p style="margin-left: 40px;"><i>nebulosus</i> (Rudow, 1886, <i>Hemiteles</i>)</p><p style="margin-left: 40px;"><i>cryptiformis</i> (Kiss, 1924, <i>Hemiteles</i>)</p><p style="margin-left: 40px;"><i>nigripes</i> (Bauer, 1958, <i>Pa…							England
301103	Animalia		Arthropoda			Insecta			Hymenoptera			Ichneumonoidea	Ichneumonidae	CRYPTINAE	PHYGADEUONTINI		Gnypetomorpha						Förster, 1869	<p style="margin-left: 40px;"><i>TRISACRA</i> Förster, 1869</p><p style="margin-left: 40px;"><i>VICTOROVIA</i> Tobias, 1963</p>
301104	Animalia		Arthropoda			Insecta			Hymenoptera			Ichneumonoidea	Ichneumonidae	CRYPTINAE	PHYGADEUONTINI		Gnypetomorpha		obscura				(Bridgman, 1883)	<p style="margin-left: 40px;"><i>Hemiteles obscurus</i> Bridgman, 1883</p><p style="margin-left: 40px;"><i>aperta</i> (Thomson, 1884, <i>Hemiteles</i>)</p>							England, Scotland
301105	Animalia		Arthropoda			Insecta			Hymenoptera			Ichneumonoidea	Ichneumonidae	CRYPTINAE	PHYGADEUONTINI		Gnypetomorpha		tubertae				Horstmann, 2012								England		added by Horstmann (2012a)
301106	Animalia		Arthropoda			Insecta			Hymenoptera			Ichneumonoidea	Ichneumonidae	CRYPTINAE	PHYGADEUONTINI		Grasseiteles						Aubert, 1965	<p style="margin-left: 40px;"><i>DIAGLYPTELLANA</i> Horstmann, 1976</p>
301107	Animalia		Arthropoda			Insecta			Hymenoptera			Ichneumonoidea	Ichneumonidae	CRYPTINAE	PHYGADEUONTINI		Grasseiteles		opaculus				(Thomson, 1884)	<p style="margin-left: 40px;"><i>Hemiteles opaculus</i> Thomson, 1884</p>							England, Scotland		Not mentioned by Schwarz &amp; Shaw (2000); included in Fitton (1978) and recently identified by M. Schwarz from material in NMS.
301108	Animalia		Arthropoda			Insecta			Hymenoptera			Ichneumonoidea	Ichneumonidae	CRYPTINAE	PHYGADEUONTINI		Grasseiteles		punctus				(Holmgren, 1857)	<p style="margin-left: 40px;"><i>Adelognathus punctus</i> Holmgren, 1857</p><p style="margin-left: 40px;"><i>sisyphii</i> (Verhoeff, 1891, <i>Hemiteles</i>)</p><p style="margin-left: 40px;"><i>punctata</i> Horstmann, 1986</p>							England, Scotland		added by Schwarz &amp; Shaw (2000)
301109	Animalia		Arthropoda			Insecta			Hymenoptera			Ichneumonoidea	Ichneumonidae	CRYPTINAE	PHYGADEUONTINI		Hemiteles						Gravenhorst, 1829	<p style="margin-left: 40px;"><i>OCYMORUS</i> Förster, 1869</p>									Many species listed as doubtfully placed species of Hemiteles by Fitton (1978) have since been transferred to other genera of Phygadeuontini. Hemiteles niger (Taschenberg) is now recognised to be a species of Thymaris (Tryphoninae). doubtfully placed species of Hemiteles: [liambus Thomson, 1885 nom. dub.] [piceus (Bridgman, 1883, Hemimachus) nom. dub. E Fitton (1976)]
301110	Animalia		Arthropoda			Insecta			Hymenoptera			Ichneumonoidea	Ichneumonidae	CRYPTINAE	PHYGADEUONTINI		Hemiteles		bipunctator				(Thunberg, 1824)	<p style="margin-left: 40px;"><i>Ichneumon bipunctator</i> Thunberg, 1824</p><p style="margin-left: 40px;"><i>cingulator</i> Gravenhorst, 1829</p><p style="margin-left: 40px;"><i>tristator</i> Gravenhorst, 1829</p><p style="margin-left: 40px;"><i>rufipleuris</i> Szépligeti, 1901</p>							England, Scotland, Ireland
301111	Animalia		Arthropoda			Insecta			Hymenoptera			Ichneumonoidea	Ichneumonidae	CRYPTINAE	PHYGADEUONTINI		Hemiteles		maricesca				Schwarz &amp; Shaw, 2000								England, Scotland, Wales		added by Schwarz &amp; Shaw (2000)
301112	Animalia		Arthropoda			Insecta			Hymenoptera			Ichneumonoidea	Ichneumonidae	CRYPTINAE	PHYGADEUONTINI		Hemiteles		rubropleuralis				Kiss, 1929								Scotland		added by Schwarz &amp; Shaw (2000)
301113	Animalia		Arthropoda			Insecta			Hymenoptera			Ichneumonoidea	Ichneumonidae	CRYPTINAE	PHYGADEUONTINI		Hemiteles		similis				(Gmelin, 1790)	<p style="margin-left: 40px;"><i>Ichneumon similis</i> Gmelin, 1790</p><p style="margin-left: 40px;"><i>?debellator</i> (Schrank, 1781, <i>Ichneumon</i>)</p><p style="margin-left: 40px;"><i>meridionalis</i> Gravenhorst, 1829</p><p style="margin-left: 40px;"><i>unicolor</i> Thomson, 1884</p>							England, Scotland, Wales, Ireland, Isle of Man
301114	Animalia		Arthropoda			Insecta			Hymenoptera			Ichneumonoidea	Ichneumonidae	CRYPTINAE	PHYGADEUONTINI		Holcomastrus						Horstmann, 2012
301115	Animalia		Arthropoda			Insecta			Hymenoptera			Ichneumonoidea	Ichneumonidae	CRYPTINAE	PHYGADEUONTINI		Holcomastrus		bituberculatus				(Schmiedeknecht, 1905)	<p style="margin-left: 40px;"><i>Hemiteles bituberculatus</i> Schmiedeknecht, 1905</p>							England		NHM, det. Broad, added here
301116	Animalia		Arthropoda			Insecta			Hymenoptera			Ichneumonoidea	Ichneumonidae	CRYPTINAE	PHYGADEUONTINI		Isadelphus						Förster, 1869	<p style="margin-left: 40px;"><i>PEROSIS</i> Förster, 1869</p><p style="margin-left: 40px;"><i>CECIDONOMUS</i> Bridgman, 1880</p>									See note for Mastrus.
301117	Animalia		Arthropoda			Insecta			Hymenoptera			Ichneumonoidea	Ichneumonidae	CRYPTINAE	PHYGADEUONTINI		Isadelphus		armatus				(Gravenhorst, 1829)	<p style="margin-left: 40px;"><i>Echthrus armatus</i> Gravenhorst, 1829</p><p style="margin-left: 40px;"><i>mandibulator</i> (Dufour &amp; Perris, 1840, <i>Anomalon</i>)</p><p style="margin-left: 40px;"><i>bidentulus</i> (Thomson, 1844, <i>Hemiteles</i>)</p>							England, Wales
301118	Animalia		Arthropoda			Insecta			Hymenoptera			Ichneumonoidea	Ichneumonidae	CRYPTINAE	PHYGADEUONTINI		Isadelphus		coriarius				(Taschenberg, 1865)	<p style="margin-left: 40px;"><i>Hemiteles coriarius</i> Taschenberg, 1865</p><p style="margin-left: 40px;"><i>rixator</i> (Woldstedt, 1877, <i>Polyblastus</i>)</p><p style="margin-left: 40px;"><i>trochanteratus</i> (Strobl, 1903, <i>Erromenus</i>)</p><p style="margin-left: 40px;"><i>carbonarius</i> (Schmiedeknecht, 1905, <i>Hemiteles</i>)</p>
301119	Animalia		Arthropoda			Insecta			Hymenoptera			Ichneumonoidea	Ichneumonidae	CRYPTINAE	PHYGADEUONTINI		Isadelphus		gallicola				(Bridgman, 1880)	<p style="margin-left: 40px;"><i>Cecidonomus gallicola</i> Bridgman, 1880</p><p style="margin-left: 40px;"><i>nigriventris</i> (Thomson, 1884, <i>Hemiteles</i>)</p><p style="margin-left: 40px;"><i>carpathicus</i> (Kiss, 1924, <i>Lissonota</i>)</p>							England, Scotland
301120	Animalia		Arthropoda			Insecta			Hymenoptera			Ichneumonoidea	Ichneumonidae	CRYPTINAE	PHYGADEUONTINI		Isadelphus		inimicus				(Gravenhorst, 1829)	<p style="margin-left: 40px;"><i>Hemiteles inimicus</i> Gravenhorst, 1829</p><p style="margin-left: 40px;"><i>rufus</i> (Bridgman, 1880, <i>Cecidonomus</i>)</p><p style="margin-left: 40px;"><i>obscuripes</i> (Thomson, 1884, <i>Hemiteles</i>)</p>							England, Scotland, Wales, Ireland, Isle of Man
301121	Animalia		Arthropoda			Insecta			Hymenoptera			Ichneumonoidea	Ichneumonidae	CRYPTINAE	PHYGADEUONTINI		Isadelphus		longisetosus				(Schmiedeknecht, 1897)	<p style="margin-left: 40px;"><i>Hemiteles longisetosus</i> Schmiedeknecht, 1897</p><p style="margin-left: 40px;"><i>added</i> by</p>							England, Scotland		added by Horstmann (2009c); treated as a separate species by Horstmann (2009c), rather than as a synonym of inimicus, as listed in Yu &amp; Horstmann (1997).
301122	Animalia		Arthropoda			Insecta			Hymenoptera			Ichneumonoidea	Ichneumonidae	CRYPTINAE	PHYGADEUONTINI		Isadelphus		minutus				Horstmann, 2009								England, Scotland		added by Horstmann (2009c)
301123	Animalia		Arthropoda			Insecta			Hymenoptera			Ichneumonoidea	Ichneumonidae	CRYPTINAE	PHYGADEUONTINI		Leptocryptoides						Horstmann, 1976
301124	Animalia		Arthropoda			Insecta			Hymenoptera			Ichneumonoidea	Ichneumonidae	CRYPTINAE	PHYGADEUONTINI		Leptocryptoides		clavipes				(Thomson, 1888)	<p style="margin-left: 40px;"><i>Leptocryptus clavipes</i> Thomson, 1888</p>							England, Ireland		added by Schwarz &amp; Shaw (2011)
301125	Animalia		Arthropoda			Insecta			Hymenoptera			Ichneumonoidea	Ichneumonidae	CRYPTINAE	PHYGADEUONTINI		Lochetica						Kriechbaumer, 1892										Some distribution data from Townes (1983).
301126	Animalia		Arthropoda			Insecta			Hymenoptera			Ichneumonoidea	Ichneumonidae	CRYPTINAE	PHYGADEUONTINI		Lochetica		westoni				(Bridgman, 1880)	<p style="margin-left: 40px;"><i>Cecidonomus westoni</i> Bridgman, 1880</p><p style="margin-left: 40px;"><i>pimplaria</i> (Thomson, 1884, <i>Phygadeuon</i>)</p>							England, Scotland
301127	Animalia		Arthropoda			Insecta			Hymenoptera			Ichneumonoidea	Ichneumonidae	CRYPTINAE	PHYGADEUONTINI		Lysibia						Förster, 1869	<p style="margin-left: 40px;"><i>PEMON</i> Förster, 1869</p><p style="margin-left: 40px;"><i>STIBOSCOPUS</i> Förster, 1869</p><p style="margin-left: 40px;"><i>HAPLASPIS</i> Townes, 1944</p>									Some distribution data from Perkins (1962) and Townes (1983).
301128	Animalia		Arthropoda			Insecta			Hymenoptera			Ichneumonoidea	Ichneumonidae	CRYPTINAE	PHYGADEUONTINI		Lysibia		ceylonensis				(Kerrich, 1956)	<p style="margin-left: 40px;"><i>Haplaspis ceylonensis</i> Kerrich, 1956</p><p style="margin-left: 40px;"><i>proxima</i> (Perkins, 1962, <i>Pemon</i>)</p>							England
301129	Animalia		Arthropoda			Insecta			Hymenoptera			Ichneumonoidea	Ichneumonidae	CRYPTINAE	PHYGADEUONTINI		Lysibia		nanus				(Gravenhorst, 1829)	<p style="margin-left: 40px;"><i>Tryphon nanus</i> Gravenhorst, 1829</p><p style="margin-left: 40px;"><i>fulvipes</i> (Gravenhorst, 1829, <i>Hemiteles</i>)</p><p style="margin-left: 40px;"><i>socialis</i> (Ratzeburg, 1844, <i>Hemiteles</i>)</p><p style="margin-left: 40px;"><i>populnea</i> (Boie, 1855, <i>Hemiteles</i>)</p>							England, Scotland, Wales, Ireland, Isle of Man
301130	Animalia		Arthropoda			Insecta			Hymenoptera			Ichneumonoidea	Ichneumonidae	CRYPTINAE	PHYGADEUONTINI		Lysibia		tenax				Townes, 1983								Scotland, Ireland		added by Townes (1983)
301131	Animalia		Arthropoda			Insecta			Hymenoptera			Ichneumonoidea	Ichneumonidae	CRYPTINAE	PHYGADEUONTINI		Mastrulus						Horstmann, 1978
301132	Animalia		Arthropoda			Insecta			Hymenoptera			Ichneumonoidea	Ichneumonidae	CRYPTINAE	PHYGADEUONTINI		Mastrulus		marshalli				(Bridgman &amp; Fitch, 1882)	<p style="margin-left: 40px;"><i>Phygadeuon marshalli</i> Bridgman &amp; Fitch, 1882</p><p style="margin-left: 40px;"><i>marshalli</i> (Bridgman, 1883, <i>Phygadeuon</i>)</p><p style="margin-left: 40px;"><i>capra</i> (Thomson, 1884, <i>Hemiteles</i>)</p><p style="margin-left: 40px;"><i>disputabilis</i> (Schmiedeknecht, 1897, <i>Hemiteles</i>)</p>							England, Scotland		Listed as a species of Theroscopus by Fitton (1978).
301133	Animalia		Arthropoda			Insecta			Hymenoptera			Ichneumonoidea	Ichneumonidae	CRYPTINAE	PHYGADEUONTINI		Mastrus						Förster, 1869	<p style="margin-left: 40px;"><i>AENOPLEX</i> Förster, 1869</p><p style="margin-left: 40px;"><i>DAICTES</i> Förster, 1869</p>									Mastrus sensu Townes (1970) was split by Horstmann (1978b) into Isadelphus, Mastrus, Micromonodon, Odontoneura and Zoophthorus. Species of Mastrus excluded from the British and Irish list: [pictipes (Gravenhorst, 1829, Hemiteles)] Listed as a doubtfully placed species of Hemiteles by Fitton (1978). Specimens under the name pictipes in the NHM have now been identified as albobasalis and longicauda…
301134	Animalia		Arthropoda			Insecta			Hymenoptera			Ichneumonoidea	Ichneumonidae	CRYPTINAE	PHYGADEUONTINI		Mastrus		albobasalis				(Schmiedeknecht, 1933)	<p style="margin-left: 40px;"><i>Hemiteles albobasalis</i> Schmiedeknecht, 1933</p>							England		added by Schwarz &amp; Shaw (2010)
301135	Animalia		Arthropoda			Insecta			Hymenoptera			Ichneumonoidea	Ichneumonidae	CRYPTINAE	PHYGADEUONTINI		Mastrus		boreaphilus				(Roman, 1939)	<p style="margin-left: 40px;"><i>Cecidonomus boreaphilus</i> Roman, 1939</p>							Scotland		added by Schwarz &amp; Shaw (2010)
301136	Animalia		Arthropoda			Insecta			Hymenoptera			Ichneumonoidea	Ichneumonidae	CRYPTINAE	PHYGADEUONTINI		Mastrus		costalis				(Thomson, 1884)	<p style="margin-left: 40px;"><i>Hemiteles costalis</i> Thomson, 1884</p>							England, Scotland		added by Schwarz &amp; Shaw (2010)
301137	Animalia		Arthropoda			Insecta			Hymenoptera			Ichneumonoidea	Ichneumonidae	CRYPTINAE	PHYGADEUONTINI		Mastrus		deminuens				(Hartig, 1838)	<p style="margin-left: 40px;"><i>Hemiteles deminuens</i> Hartig, 1838</p><p style="margin-left: 40px;"><i>castaneus</i> (Taschenberg, 1865, <i>Hemiteles</i>)</p><p style="margin-left: 40px;"><i>bredensis</i> (Smits$<i></i>)</p><p style="margin-left: 40px;"><i>ripicola</i> (Habermehl, 1920, <i>Hemiteles</i>)</p>							England, Scotland, Wales, Ireland
301138	Animalia		Arthropoda			Insecta			Hymenoptera			Ichneumonoidea	Ichneumonidae	CRYPTINAE	PHYGADEUONTINI		Mastrus		fumipennis				(Thomson, 1884)	<p style="margin-left: 40px;"><i>Hemiteles fumipennis</i> Thomson, 1884</p>							Ireland		Listed as a doubtfully placed species of Hemiteles by Fitton (1978).
301139	Animalia		Arthropoda			Insecta			Hymenoptera			Ichneumonoidea	Ichneumonidae	CRYPTINAE	PHYGADEUONTINI		Mastrus		longicauda				Horstmann, 1990								England		NHM, det. Broad &amp; Horstmann, added here
301140	Animalia		Arthropoda			Insecta			Hymenoptera			Ichneumonoidea	Ichneumonidae	CRYPTINAE	PHYGADEUONTINI		Mastrus		longulus				Horstmann, 1990								England		added by Horstmann (1990b)
301141	Animalia		Arthropoda			Insecta			Hymenoptera			Ichneumonoidea	Ichneumonidae	CRYPTINAE	PHYGADEUONTINI		Mastrus		mandibularis				Horstmann, 1990								England		added by Horstmann (1990b)
301142	Animalia		Arthropoda			Insecta			Hymenoptera			Ichneumonoidea	Ichneumonidae	CRYPTINAE	PHYGADEUONTINI		Mastrus		parviceps				(Hellén, 1967)	<p style="margin-left: 40px;"><i>Isadelphus parviceps</i> Hellén, 1967</p>							Scotland		added by Schwarz &amp; Shaw (2010)
301143	Animalia		Arthropoda			Insecta			Hymenoptera			Ichneumonoidea	Ichneumonidae	CRYPTINAE	PHYGADEUONTINI		Mastrus		ridibundus				(Gravenhorst, 1829)	<p style="margin-left: 40px;"><i>Hemiteles ridibundus</i> Gravenhorst, 1829</p>							England, Ireland		Listed as a doubtfully placed species of Hemiteles by Fitton (1978).
301144	Animalia		Arthropoda			Insecta			Hymenoptera			Ichneumonoidea	Ichneumonidae	CRYPTINAE	PHYGADEUONTINI		Mastrus		?rufobasalis				(Habermehl, 1920)	<p style="margin-left: 40px;"><i>Hemiteles ?rufobasalis</i> Habermehl, 1920</p>							Isle of Man		added by Schwarz &amp; Shaw (2010); tentative identification by K. Horstmann.
301145	Animalia		Arthropoda			Insecta			Hymenoptera			Ichneumonoidea	Ichneumonidae	CRYPTINAE	PHYGADEUONTINI		Mastrus		rufulus				(Thomson, 1884)	<p style="margin-left: 40px;"><i>Hemiteles rufulus</i> Thomson, 1884</p><p style="margin-left: 40px;"><i>nigrobasalis</i> (Schmiedeknecht, 1905, <i>Hemiteles</i>)</p><p style="margin-left: 40px;"><i>rusticus</i> (Habermehl, 1920, <i>Hemiteles</i>)</p><p style="margin-left: 40px;"><i>nigricoxis</i> (Hedwig, 1959, <i>Phygadeuon</i>)</p>							England, Ireland		Listed as a doubtfully placed species of Hemiteles by Fitton (1978).
301146	Animalia		Arthropoda			Insecta			Hymenoptera			Ichneumonoidea	Ichneumonidae	CRYPTINAE	PHYGADEUONTINI		Mastrus		silbernageli				(Kiss, 1929)	<p style="margin-left: 40px;"><i>Hemiteles silbernageli</i> Kiss, 1929</p><p style="margin-left: 40px;"><i>leptocryptoides</i> (Schmiedeknecht, 1933, <i>Hemiteles</i>)</p>							England, Scotland, Wales		added by Schwarz &amp; Shaw (2010)
301147	Animalia		Arthropoda			Insecta			Hymenoptera			Ichneumonoidea	Ichneumonidae	CRYPTINAE	PHYGADEUONTINI		Mastrus		sordipes				(Gravenhorst, 1829)	<p style="margin-left: 40px;"><i>Hemiteles sordipes</i> Gravenhorst, 1829</p><p style="margin-left: 40px;"><i>karpinskii</i> (Glowacki, 1967, <i>Hemiteles</i>)</p>							England, Scotland		Listed as a doubtfully placed species of Hemiteles by Fitton (1978).
301148	Animalia		Arthropoda			Insecta			Hymenoptera			Ichneumonoidea	Ichneumonidae	CRYPTINAE	PHYGADEUONTINI		Mastrus		tenuicosta				(Thomson, 1884)	<p style="margin-left: 40px;"><i>Phygadeuon tenuicosta</i> Thomson, 1884</p>							England, Scotland		added by Schwarz &amp; Shaw (2010)
301149	Animalia		Arthropoda			Insecta			Hymenoptera			Ichneumonoidea	Ichneumonidae	CRYPTINAE	PHYGADEUONTINI		Mastrus		varicoxis				(Taschenberg, 1865)	<p style="margin-left: 40px;"><i>Hemiteles varicoxis</i> Taschenberg, 1865</p><p style="margin-left: 40px;"><i>?coactus</i> (Ratzeburg, 1852, <i>Hemiteles</i>)</p><p style="margin-left: 40px;"><i>tricoloripes</i> (Schmiedeknecht, 1932, <i>Hemiteles</i>)</p>							England, Scotland, Ireland		Listed as a doubtfully placed species of Hemiteles by Fitton (1978).
301150	Animalia		Arthropoda			Insecta			Hymenoptera			Ichneumonoidea	Ichneumonidae	CRYPTINAE	PHYGADEUONTINI		Medophron						Förster, 1869	<p style="margin-left: 40px;"><i>BARYNTICA</i> Förster, 1869</p><p style="margin-left: 40px;"><i>HEDYLUS</i> Förster, 1869</p><p style="margin-left: 40px;"><i>SUBHEMITELES</i> Horstmann, 1976</p>									Some distribution data from Horstmann (1998a).
301151	Animalia		Arthropoda			Insecta			Hymenoptera			Ichneumonoidea	Ichneumonidae	CRYPTINAE	PHYGADEUONTINI		Medophron		afflictor				(Gravenhorst, 1829)	<p style="margin-left: 40px;"><i>Phygadeuon afflictor</i> Gravenhorst, 1829</p><p style="margin-left: 40px;"><i>nigritus</i> (Gravenhorst, 1829, <i>Phygadeuon</i>)</p><p style="margin-left: 40px;"><i>niger</i> Brischke, 1881</p>							Wales
301152	Animalia		Arthropoda			Insecta			Hymenoptera			Ichneumonoidea	Ichneumonidae	CRYPTINAE	PHYGADEUONTINI		Medophron		armatulus				(Thomson, 1888)	<p style="margin-left: 40px;"><i>Phygadeuon armatulus</i> Thomson, 1888</p>							England, Scotland, Isle of Man		added by Schwarz &amp; Shaw (2010)
301153	Animalia		Arthropoda			Insecta			Hymenoptera			Ichneumonoidea	Ichneumonidae	CRYPTINAE	PHYGADEUONTINI		Medophron		crassicornis				(Gravenhorst, 1829)	<p style="margin-left: 40px;"><i>Hemiteles crassicornis</i> Gravenhorst, 1829</p>
301154	Animalia		Arthropoda			Insecta			Hymenoptera			Ichneumonoidea	Ichneumonidae	CRYPTINAE	PHYGADEUONTINI		Medophron		mixtus				(Bridgman, 1883)	<p style="margin-left: 40px;"><i>Hemiteles mixtus</i> Bridgman, 1883</p><p style="margin-left: 40px;"><i>flavipes</i> (Thomson, 1888, <i>Phygadeuon</i>)</p><p style="margin-left: 40px;"><i>mandibularis</i> (Brischke, 1891, <i>Phygadeuon</i>)</p><p style="margin-left: 40px;"><i>flavitarsis</i> (Dalla Torre, 1901, <i>Phygadeuon</i>)</p>							England, Ireland
301155	Animalia		Arthropoda			Insecta			Hymenoptera			Ichneumonoidea	Ichneumonidae	CRYPTINAE	PHYGADEUONTINI		Medophron		nigriceps				(Thomson, 1883)	<p style="margin-left: 40px;"><i>Acanthocryptus nigriceps</i> Thomson, 1883</p><p style="margin-left: 40px;"><i>elegans</i> (Schmiedeknecht, 1932, <i>Stylocryptus</i>)</p>							England
301156	Animalia		Arthropoda			Insecta			Hymenoptera			Ichneumonoidea	Ichneumonidae	CRYPTINAE	PHYGADEUONTINI		Medophron		nitidus				(Horstmann, 1976)	<p style="margin-left: 40px;"><i>Subhemiteles nitidus</i> Horstmann, 1976</p>							England		added by Horstmann (1998a)
[truncated: 2,044 more rows]
